# Supplementary material for: Synthesis and biological evaluation of fluoro-substituted spiro-isoxazolines as potential anti-viral and anti-cancer agents
Source: Royal Society of Chemistry journal article supplement (doi:10.1039/d0ra06148d), 2020-01-01

## SUPPORTING INFORMATION

# Synthesis and Biological Evaluation of Fluoro-Substituted Spiro-Isoxazolines as Potential Anti-Viral and Anti-Cancer Agents

Prasanta Das,<sup>\*,a</sup> Sarah Boone,<sup>b</sup> Dipanwita Mitra,<sup>b</sup> Lindsay Turner,<sup>c</sup> Ritesh Tandon,<sup>b</sup> Drazen Raucher,<sup>c</sup> and Ashton T. Hamme II<sup>\*,a</sup>

<sup>a</sup>Department of Chemistry and Biochemistry, Jackson State University, Jackson, Mississippi 39217, United States

<sup>b</sup>Department of Microbiology and Immunology and <sup>c</sup>Department of Cellular and Molecular Biology, University of Mississippi Medical Center, Jackson, Mississippi 39216, United States

Email: prasanta.das@jsums.edu, and ashton.t.hamme@jsums.edu

| Table of Contents                                                 | Page |
|-------------------------------------------------------------------|------|
| <sup>1</sup> H and <sup>13</sup> C Spectra of <b>3b</b> .....     | S2   |
| <sup>1</sup> H and <sup>13</sup> C Spectra of <b>3c</b> .....     | S3   |
| <sup>1</sup> H and <sup>13</sup> C Spectra of <b>3e</b> .....     | S4   |
| <sup>1</sup> H and <sup>13</sup> C Spectra of <b>3g</b> .....     | S5   |
| <sup>1</sup> H and <sup>13</sup> C Spectra of <b>3h</b> .....     | S6   |
| <sup>1</sup> H and <sup>13</sup> C Spectra of <b>3j</b> .....     | S7   |
| <sup>1</sup> H and <sup>13</sup> C Spectra of <b>3l</b> .....     | S8   |
| <sup>1</sup> H and <sup>13</sup> C Spectra of <b>3n</b> .....     | S9   |
| <sup>1</sup> H and <sup>13</sup> C Spectra of <b>3o</b> .....     | S10  |
| <sup>1</sup> H and <sup>13</sup> C Spectra of <b>3q</b> .....     | S11  |
| <sup>1</sup> H and <sup>13</sup> C Spectra of <b>3r</b> .....     | S12  |
| <sup>1</sup> H and <sup>13</sup> C Spectra of <b>3t</b> .....     | S13  |
| <sup>1</sup> H and <sup>13</sup> C Spectra of <b>3v</b> .....     | S14  |
| <sup>1</sup> H and <sup>13</sup> C Spectra of <b>3w</b> .....     | S15  |
| <sup>1</sup> H and <sup>13</sup> C Spectra of <b>3x</b> .....     | S16  |
| <sup>1</sup> H and <sup>13</sup> C Spectra of <b>4a/4a'</b> ..... | S17  |
| <sup>19</sup> F spectra of <b>4a/4a'</b> .....                    | S18  |
| <sup>1</sup> H and <sup>13</sup> C Spectra of <b>4b/4b'</b> ..... | S19  |
| <sup>19</sup> F spectra of <b>4b/4b'</b> .....                    | S20  |
| <sup>1</sup> H and <sup>13</sup> C Spectra of <b>4c</b> .....     | S21  |
| <sup>1</sup> H and <sup>13</sup> C Spectra of <b>4c'</b> .....    | S22  |
| <sup>19</sup> F spectra of <b>4c/4c'</b> .....                    | S23  |
| <sup>1</sup> H and <sup>13</sup> C Spectra of <b>4d</b> .....     | S24  |
| <sup>1</sup> H and <sup>13</sup> C Spectra of <b>4d'</b> .....    | S25  |
| <sup>19</sup> F spectra of <b>4d/4d'</b> .....                    | S26  |
| <sup>1</sup> H and <sup>13</sup> C Spectra of <b>4e</b> .....     | S27  |
| <sup>1</sup> H Spectra of <b>4e'</b> .....                        | S28  |
| <sup>19</sup> F spectra of <b>4e/4e'</b> .....                    | S29  |
| <sup>1</sup> H and <sup>13</sup> C Spectra of <b>4f/4f'</b> ..... | S30  |
| <sup>19</sup> F spectra of <b>4f/4f'</b> .....                    | S31  |
| <sup>1</sup> H and <sup>13</sup> C Spectra of <b>4g</b> .....     | S32  |
| <sup>1</sup> H and <sup>19</sup> F Spectra of <b>4g'</b> .....    | S33  |
| <sup>1</sup> H and <sup>13</sup> C Spectra of <b>4h/4h'</b> ..... | S34  |
| <sup>19</sup> F spectra of <b>4h</b> .....                        | S35  |
| <sup>1</sup> H and <sup>13</sup> C Spectra of <b>4i</b> .....     | S36  |
| <sup>19</sup> F spectra of <b>4i/4i'</b> .....                    | S37  |
| <sup>1</sup> H and <sup>13</sup> C Spectra of <b>4j/4j'</b> ..... | S38  |
| <sup>19</sup> F spectra of <b>4j/4j'</b> .....                    | S39  |
| <sup>1</sup> H and <sup>13</sup> C Spectra of <b>4k/4k'</b> ..... | S40  |
| <sup>19</sup> F spectra of <b>4k/4k'</b> .....                    | S41  |
| <sup>1</sup> H and <sup>13</sup> C Spectra of <b>4l/4l'</b> ..... | S42  |
| <sup>19</sup> F spectra of <b>4l/4l'</b> .....                    | S43  |
| <sup>1</sup> H and <sup>13</sup> C Spectra of <b>4m/4m'</b> ..... | S44  |

| Table of Contents                                                 | Page |
|-------------------------------------------------------------------|------|
| <sup>19</sup> F spectra of <b>4m/4m'</b> .....                    | S45  |
| <sup>1</sup> H and <sup>13</sup> C Spectra of <b>4n/4n'</b> ..... | S46  |
| <sup>19</sup> F spectra of <b>4n'</b> .....                       | S47  |
| <sup>1</sup> H and <sup>13</sup> C Spectra of <b>4o/4o'</b> ..... | S48  |
| <sup>19</sup> F spectra of <b>4o'</b> .....                       | S49  |
| <sup>1</sup> H and <sup>13</sup> C Spectra of <b>5a</b> .....     | S50  |
| <sup>1</sup> H and <sup>13</sup> C Spectra of <b>5a'</b> .....    | S51  |
| <sup>19</sup> F spectra of <b>5a/5a'</b> .....                    | S52  |
| <sup>1</sup> H and <sup>13</sup> C Spectra of <b>5b</b> .....     | S53  |
| <sup>1</sup> H and <sup>13</sup> C Spectra of <b>5b'</b> .....    | S54  |
| <sup>19</sup> F spectra of <b>5a/5a'</b> .....                    | S55  |
| <sup>1</sup> H and <sup>13</sup> C Spectra of <b>5c</b> .....     | S56  |
| <sup>1</sup> H and <sup>13</sup> C Spectra of <b>5c'</b> .....    | S57  |
| <sup>19</sup> F spectra of <b>5c/5c'</b> .....                    | S58  |
| <sup>1</sup> H and <sup>13</sup> C Spectra of <b>5d</b> .....     | S59  |
| <sup>1</sup> H and <sup>13</sup> C Spectra of <b>5d'</b> .....    | S60  |
| <sup>19</sup> F spectra of <b>5d/5d'</b> .....                    | S61  |
| <sup>1</sup> H and <sup>13</sup> C Spectra of <b>5e</b> .....     | S62  |
| <sup>1</sup> H and <sup>13</sup> C Spectra of <b>5e'</b> .....    | S63  |
| <sup>19</sup> F spectra of <b>5e/5e'</b> .....                    | S64  |
| <sup>1</sup> H and <sup>13</sup> C Spectra of <b>5f</b> .....     | S65  |
| <sup>1</sup> H and <sup>13</sup> C Spectra of <b>5f'</b> .....    | S66  |
| <sup>19</sup> F spectra of <b>5f/5f'</b> .....                    | S67  |
| <sup>1</sup> H and <sup>13</sup> C Spectra of <b>5g</b> .....     | S68  |
| <sup>1</sup> H and <sup>13</sup> C Spectra of <b>5g'</b> .....    | S69  |
| <sup>19</sup> F spectra of <b>5g/5g'</b> .....                    | S70  |
| <sup>1</sup> H and <sup>13</sup> C Spectra of <b>5h</b> .....     | S71  |
| <sup>1</sup> H and <sup>13</sup> C Spectra of <b>5h'</b> .....    | S72  |
| <sup>19</sup> F spectra of <b>5h/5h'</b> .....                    | S73  |
| <sup>1</sup> H and <sup>13</sup> C Spectra of <b>5i</b> .....     | S74  |
| <sup>1</sup> H spectra of <b>5i'</b> .....                        | S75  |
| <sup>19</sup> F spectra of <b>5i/5i'</b> .....                    | S76  |
| <sup>1</sup> H and <sup>13</sup> C Spectra of <b>5j/5j'</b> ..... | S77  |
| <sup>19</sup> F spectra of <b>5j/5j'</b> .....                    | S78  |
| <sup>1</sup> H and <sup>13</sup> C Spectra of <b>5k/5k'</b> ..... | S79  |
| <sup>19</sup> F spectra of <b>5k/5k'</b> .....                    | S80  |

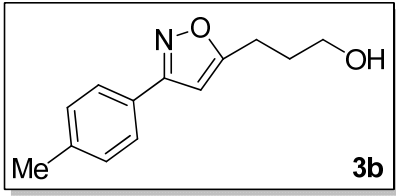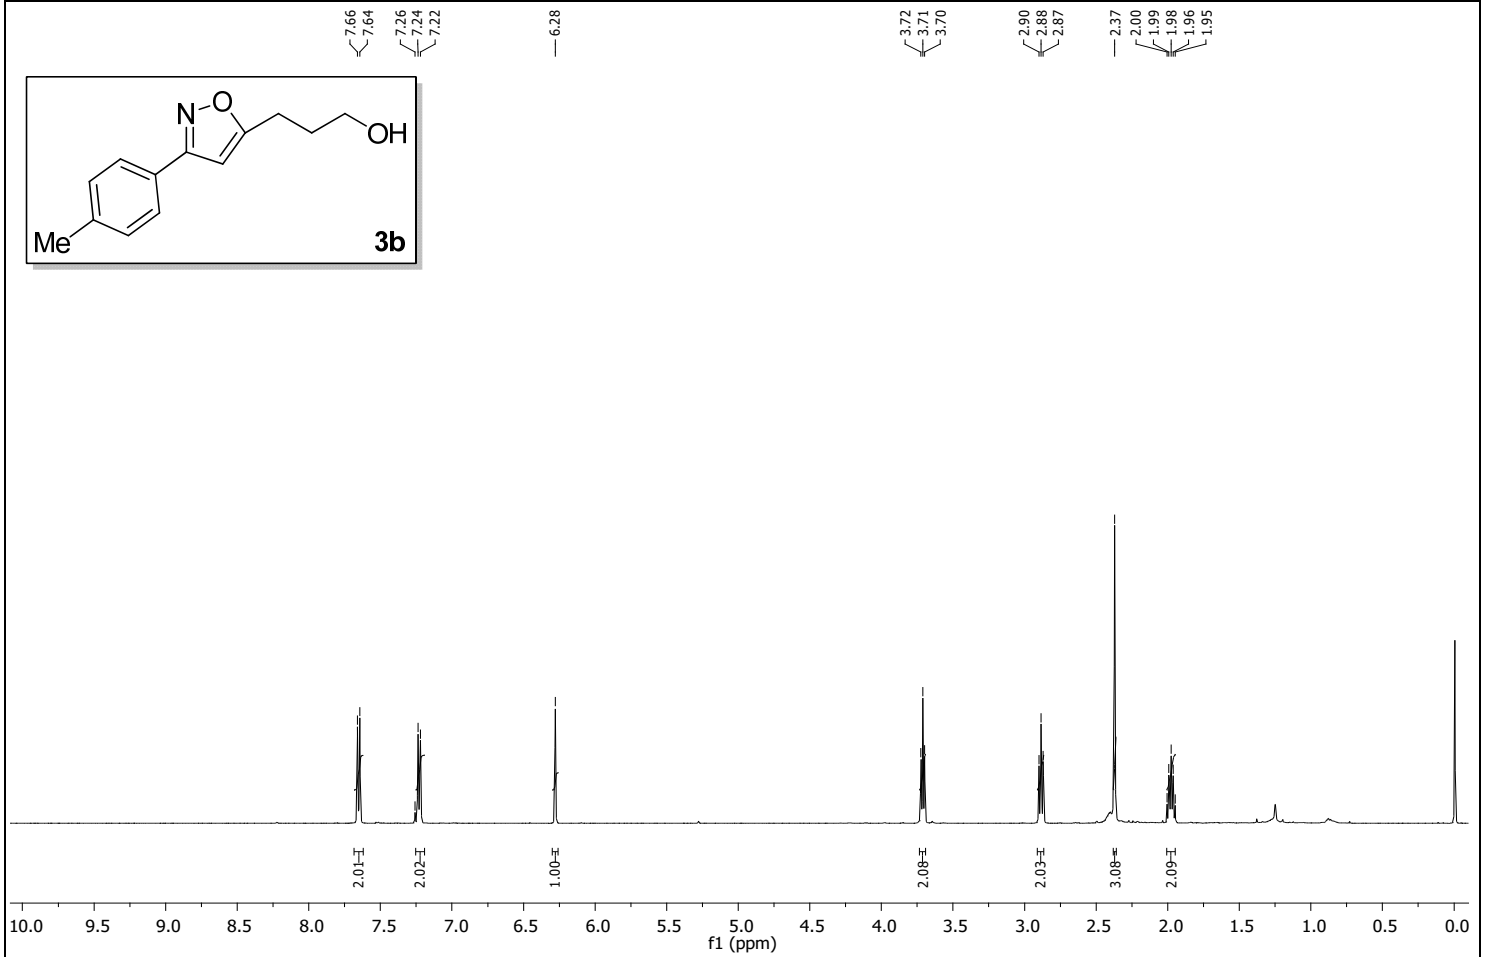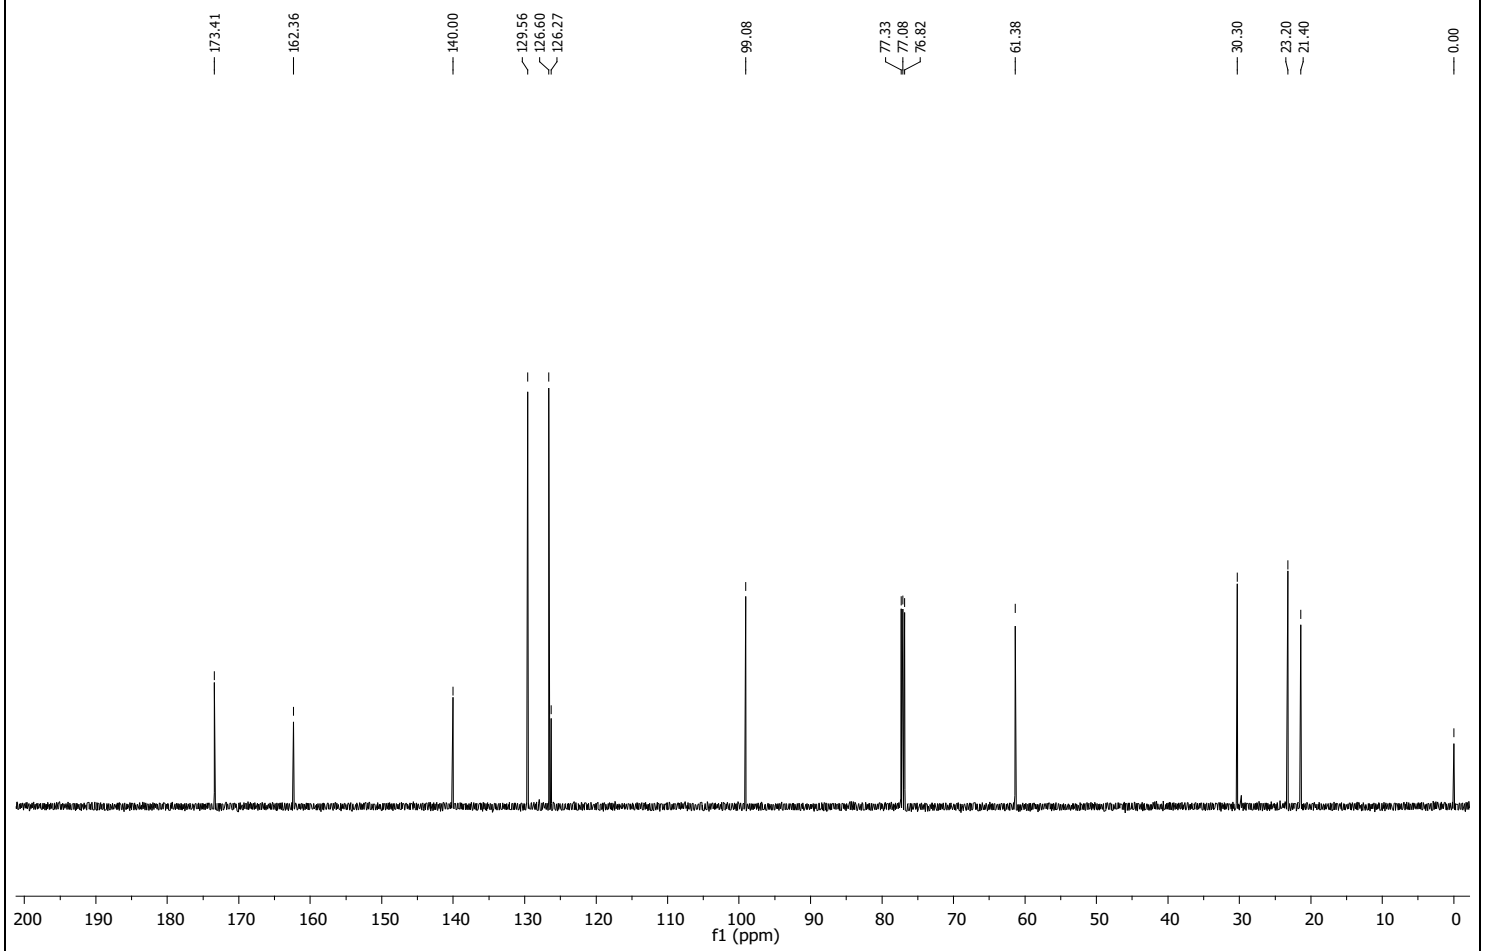

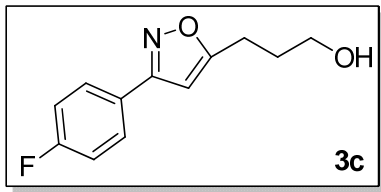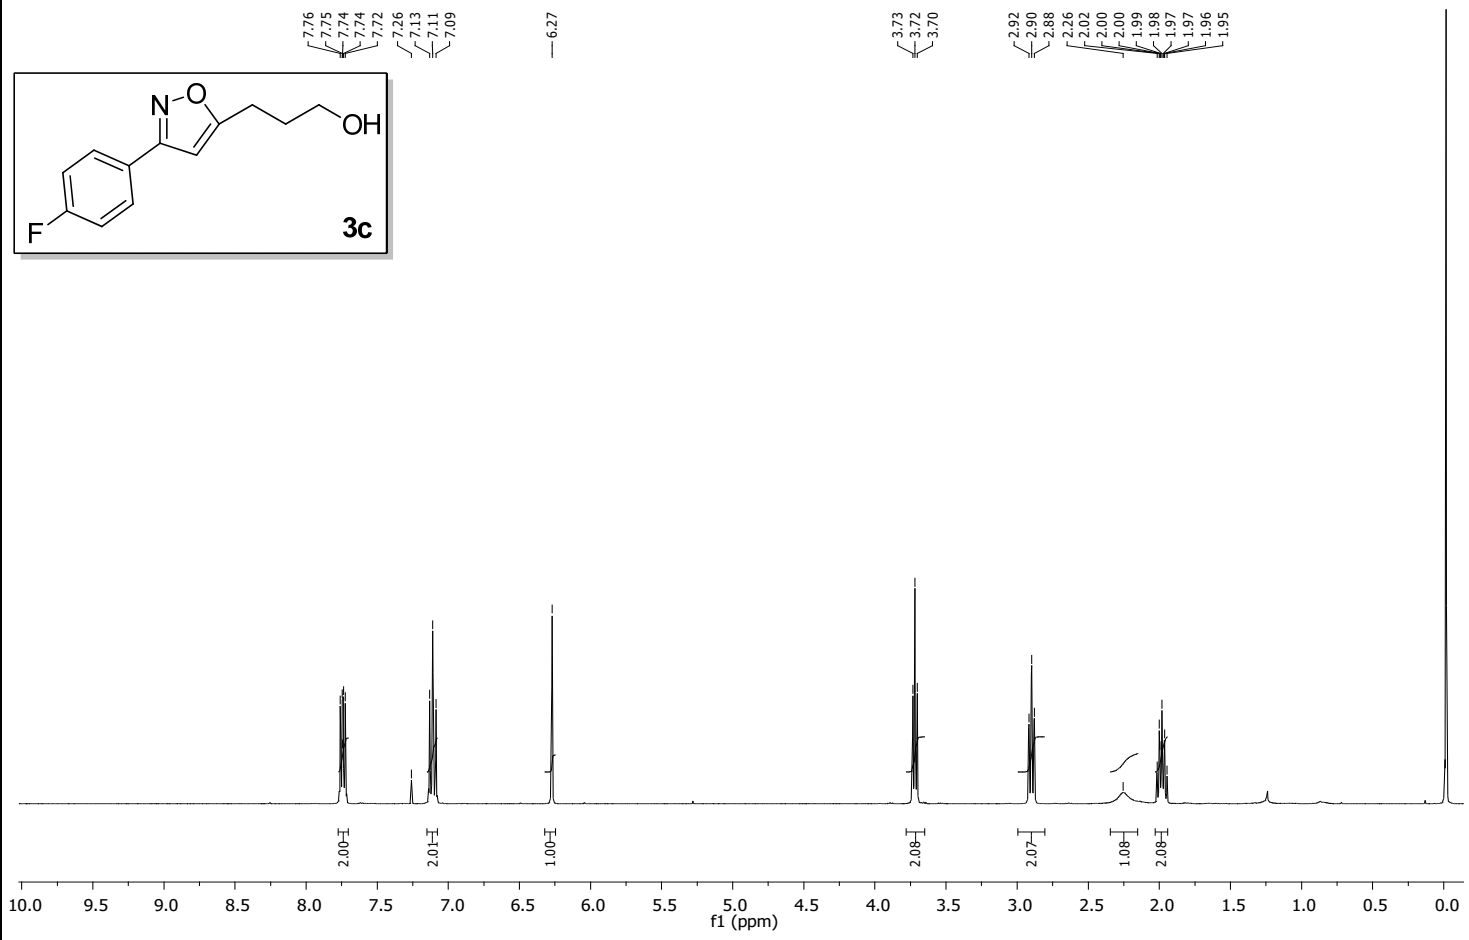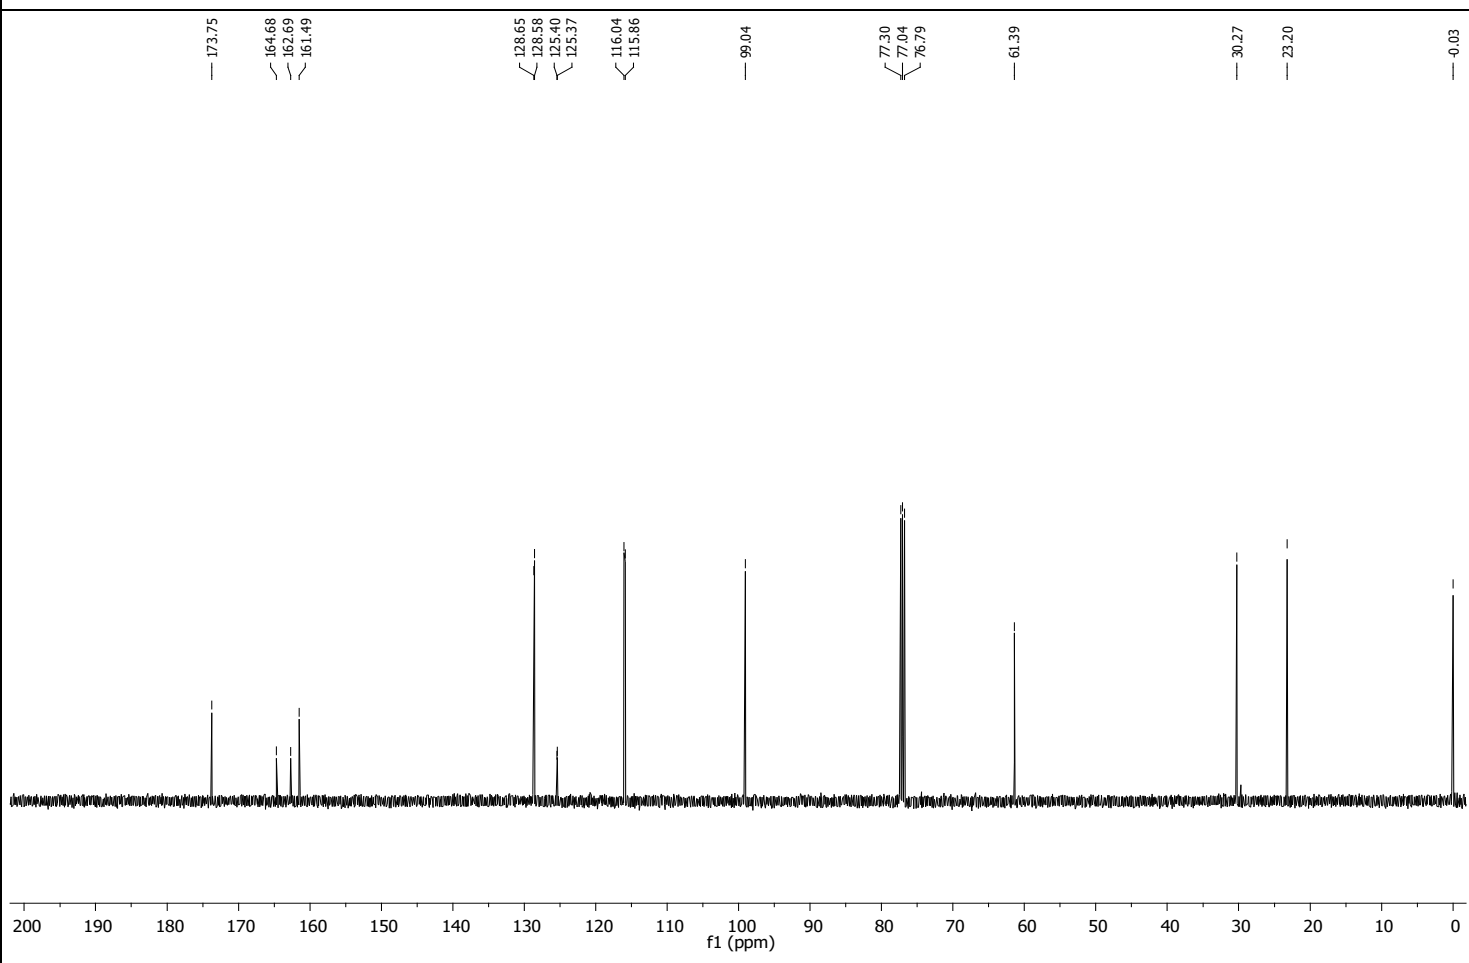

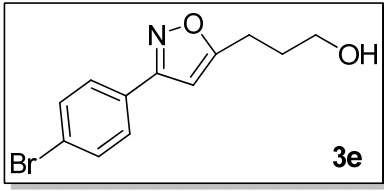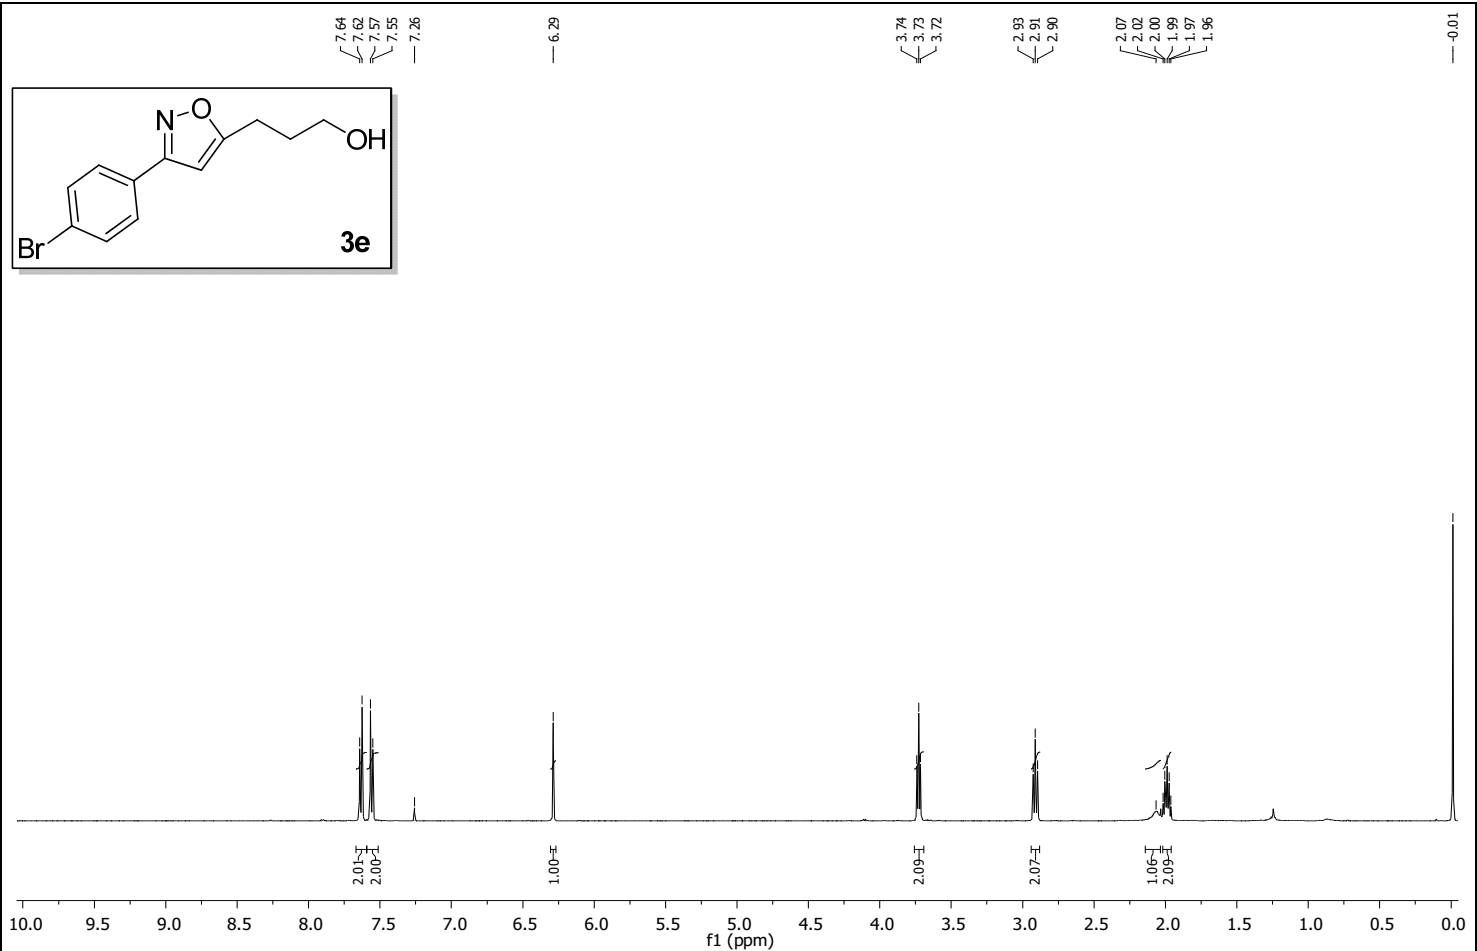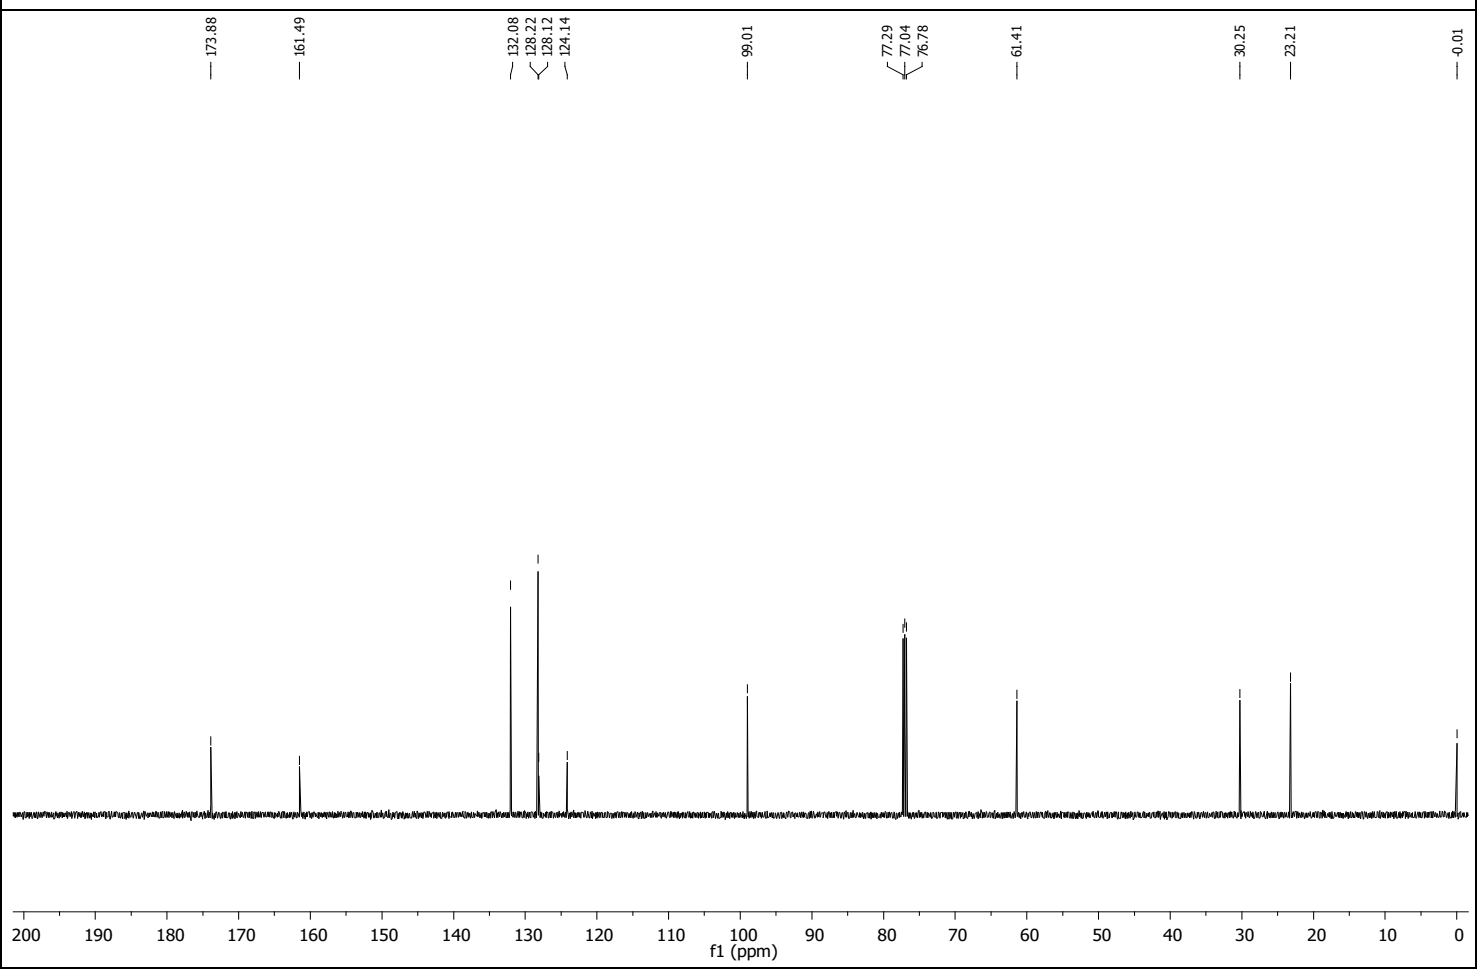

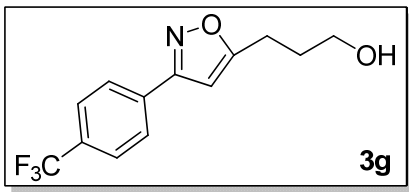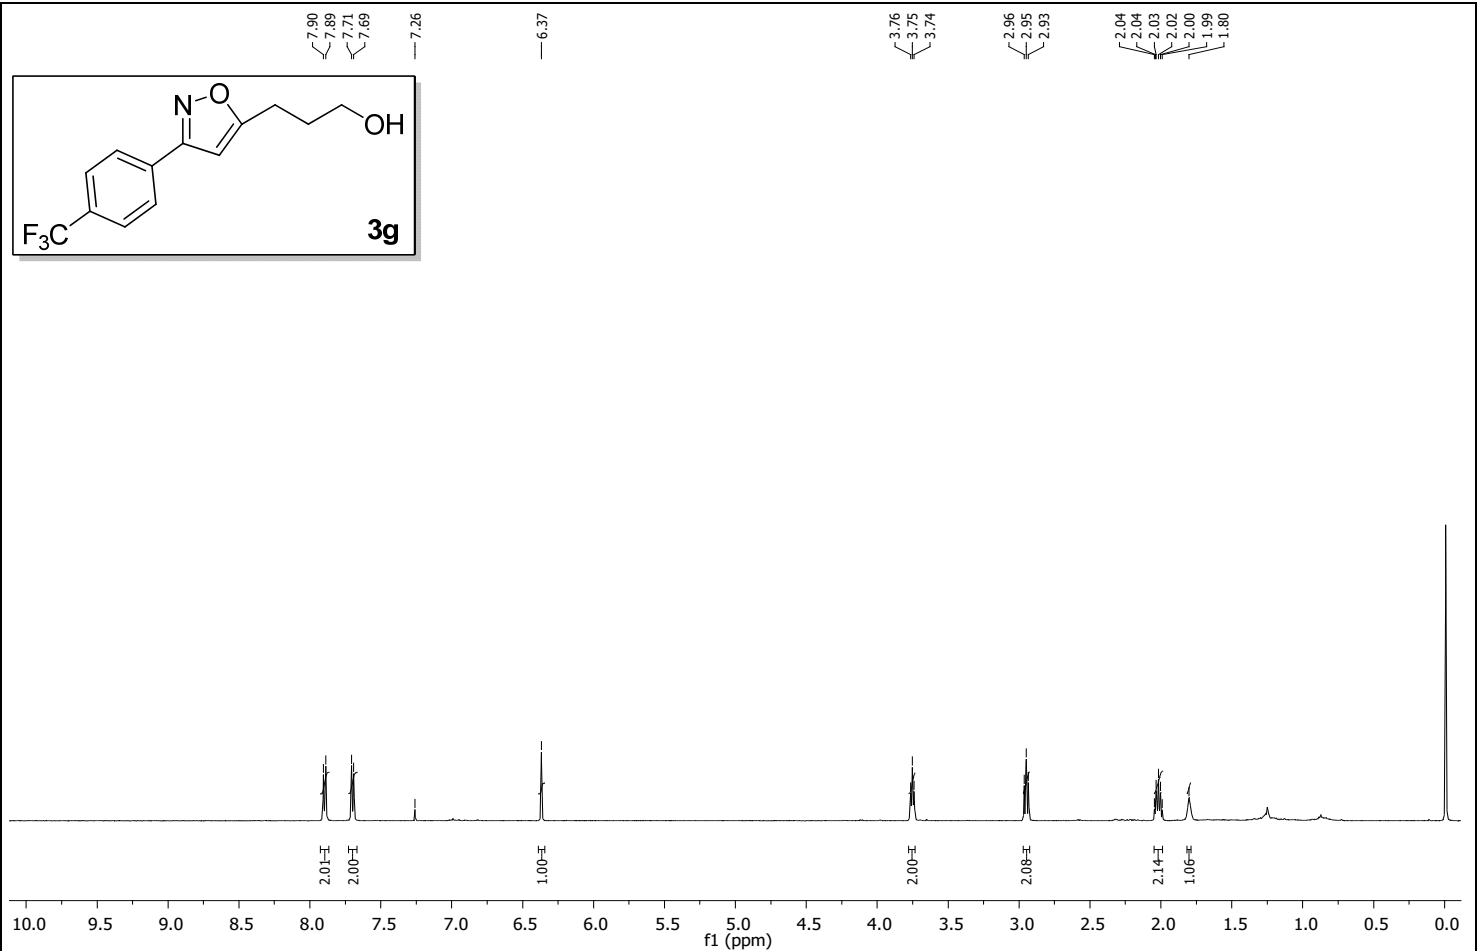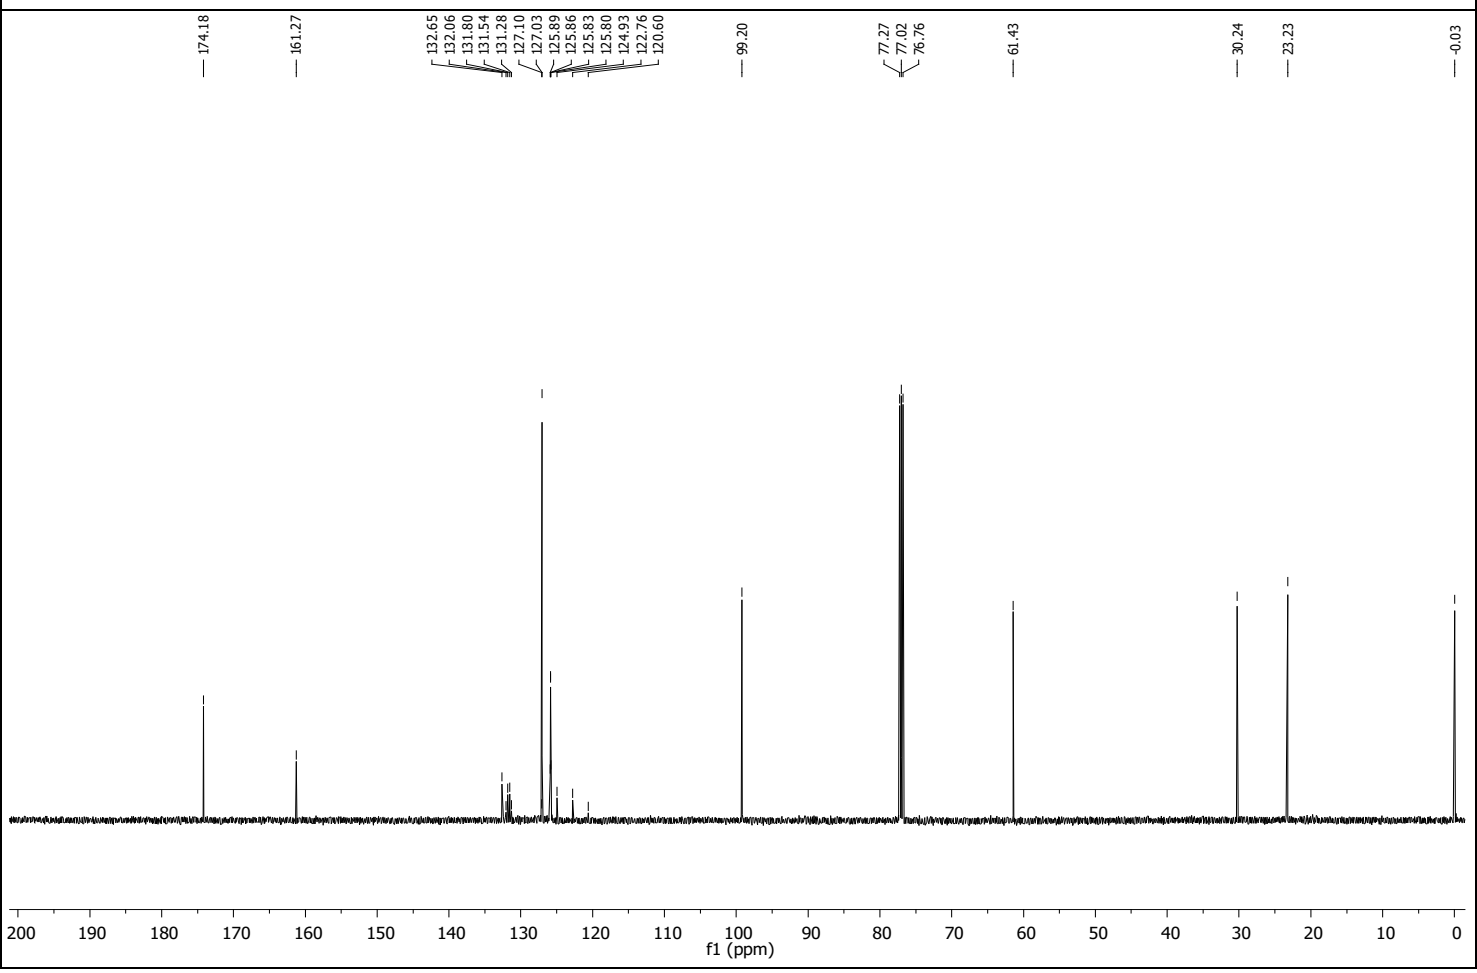

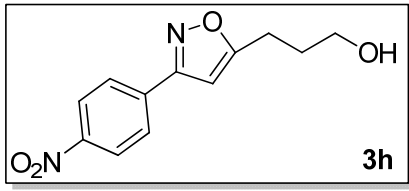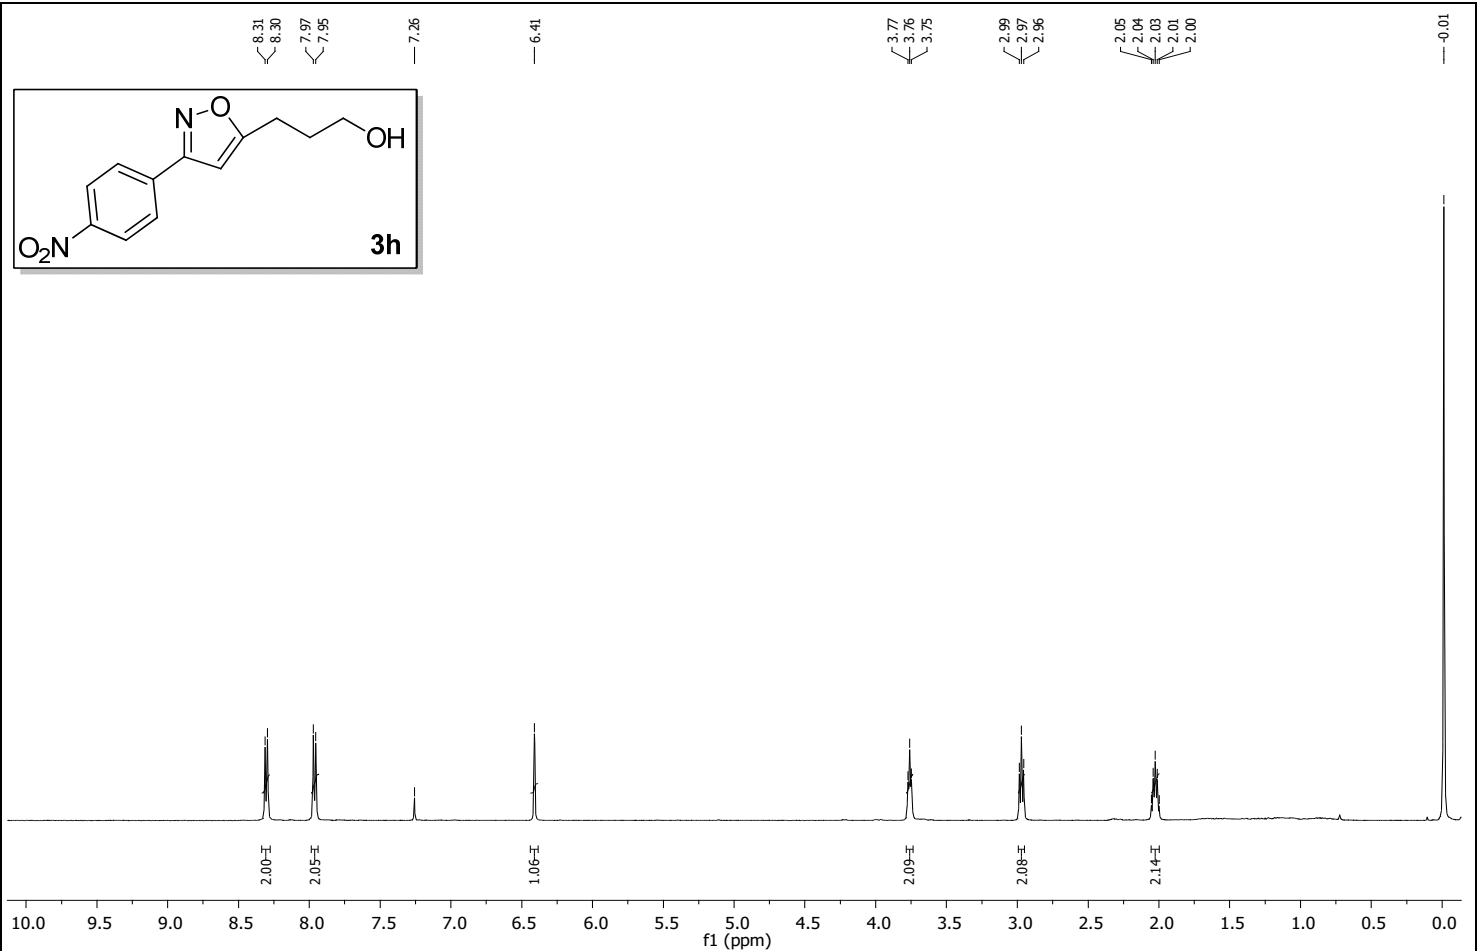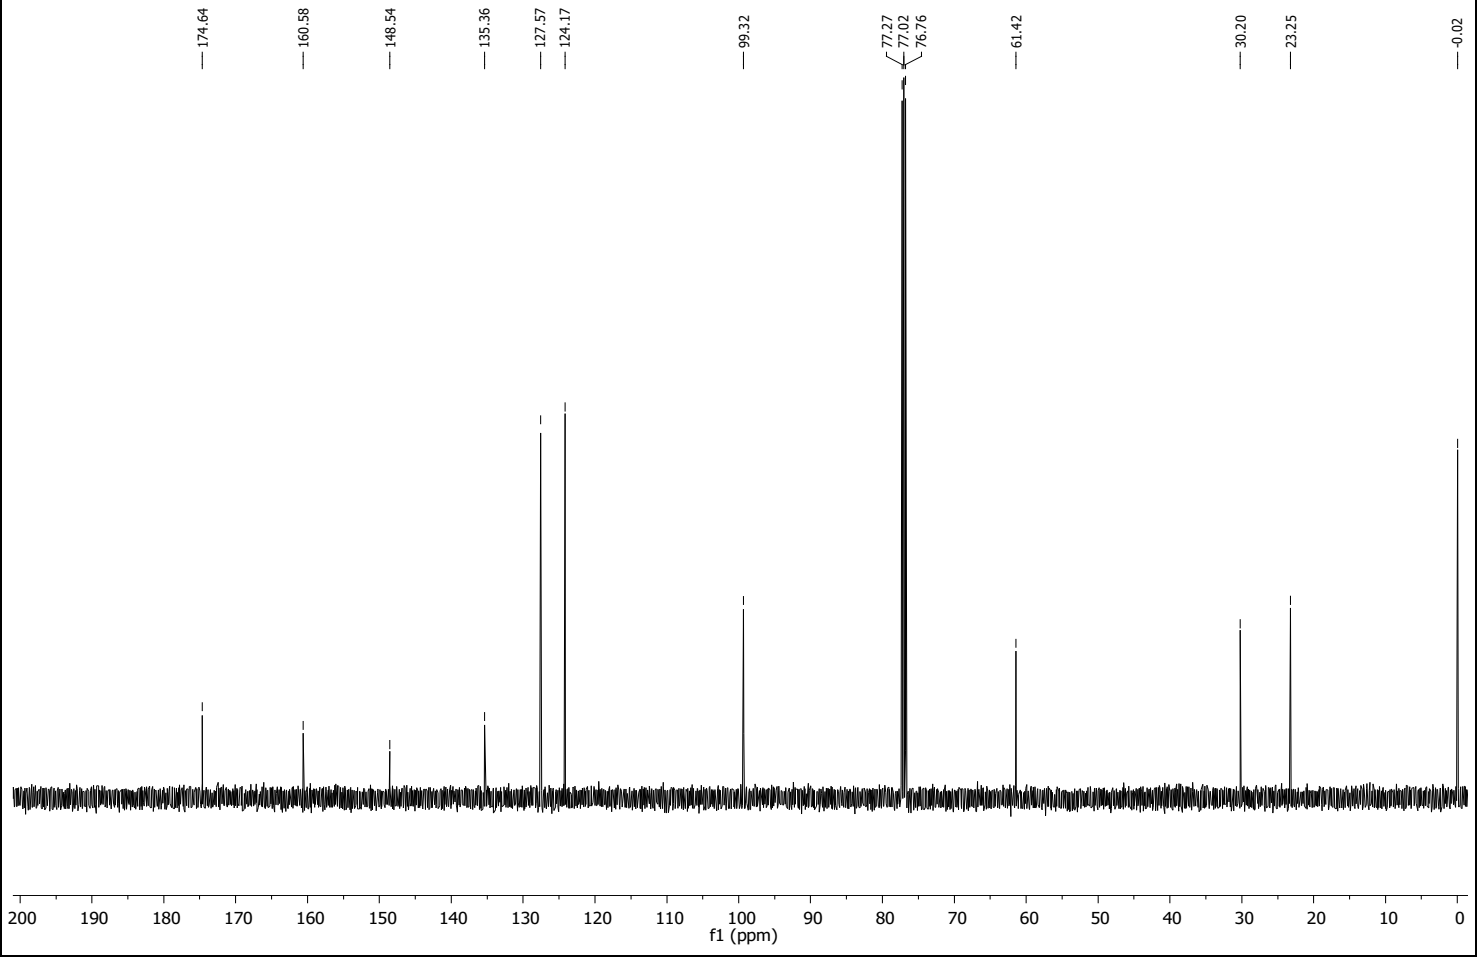

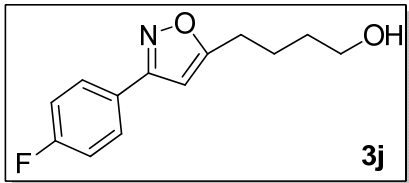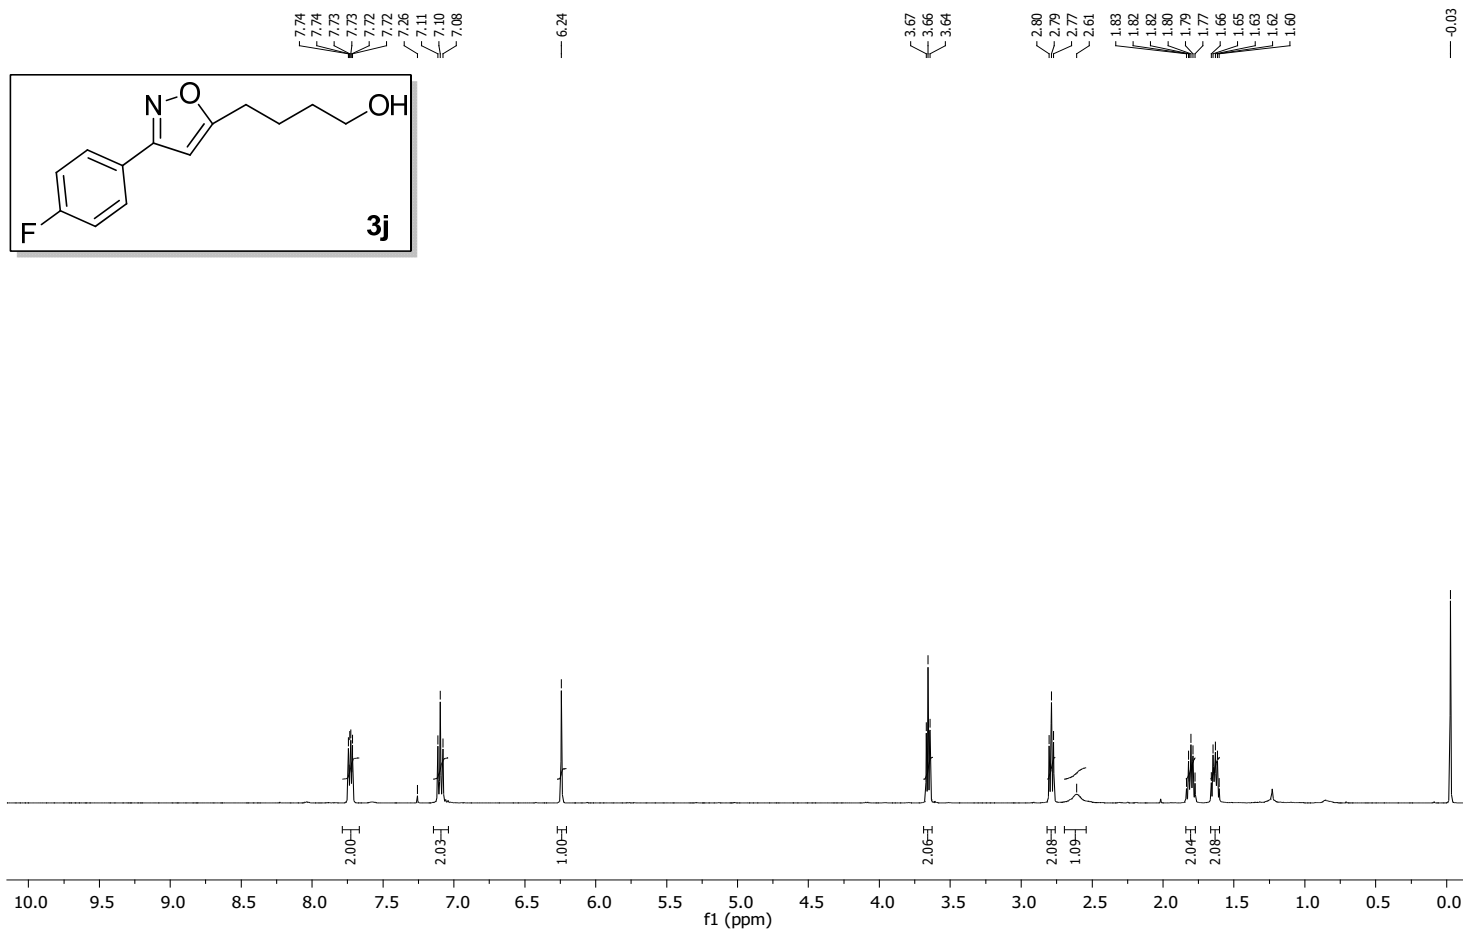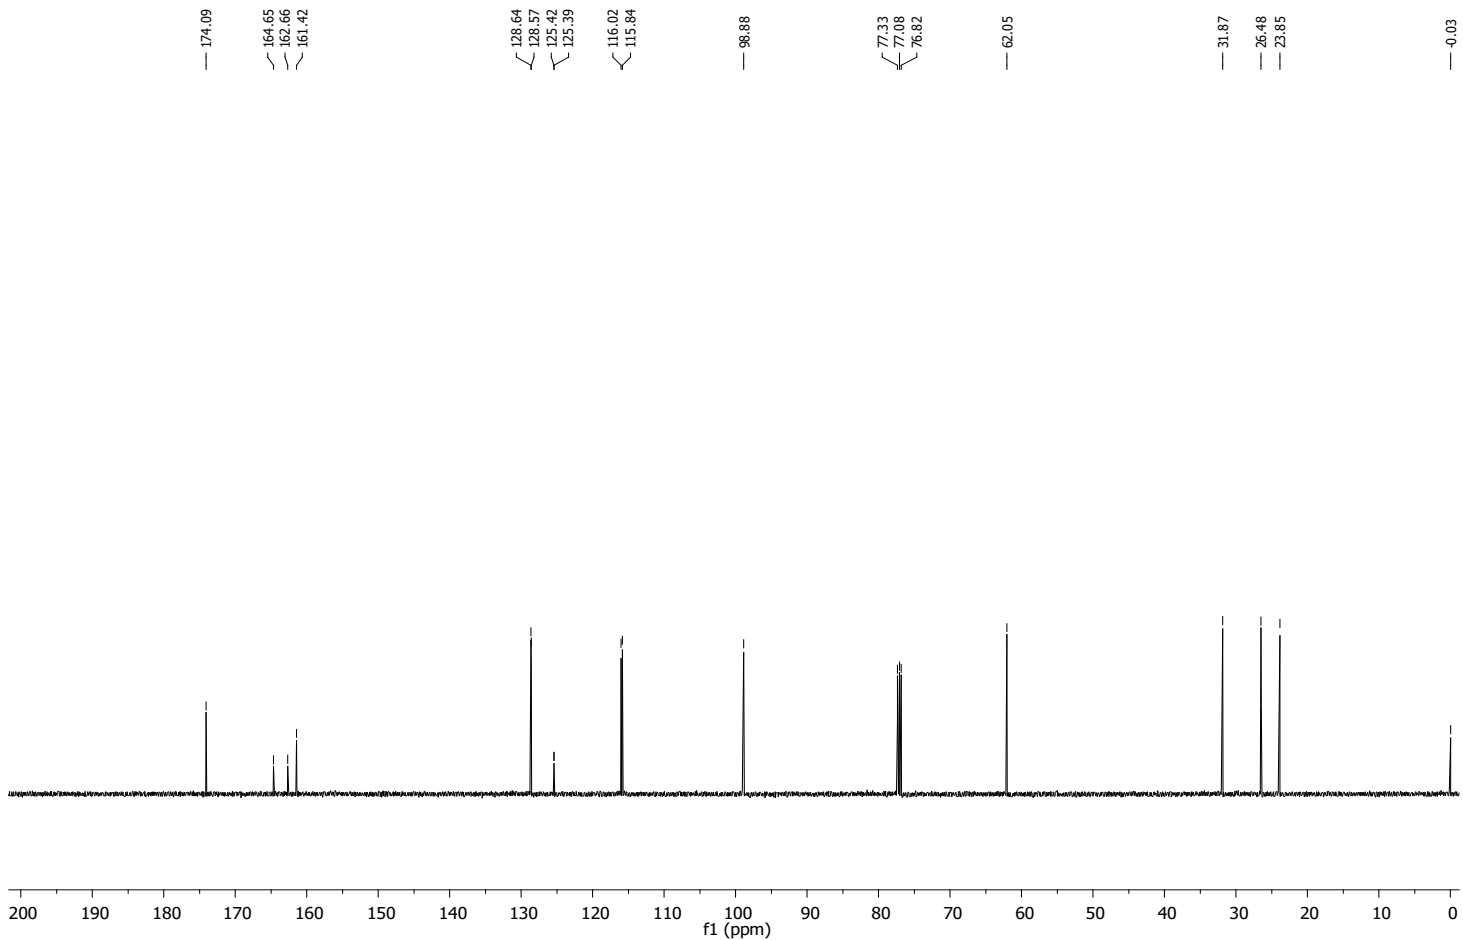

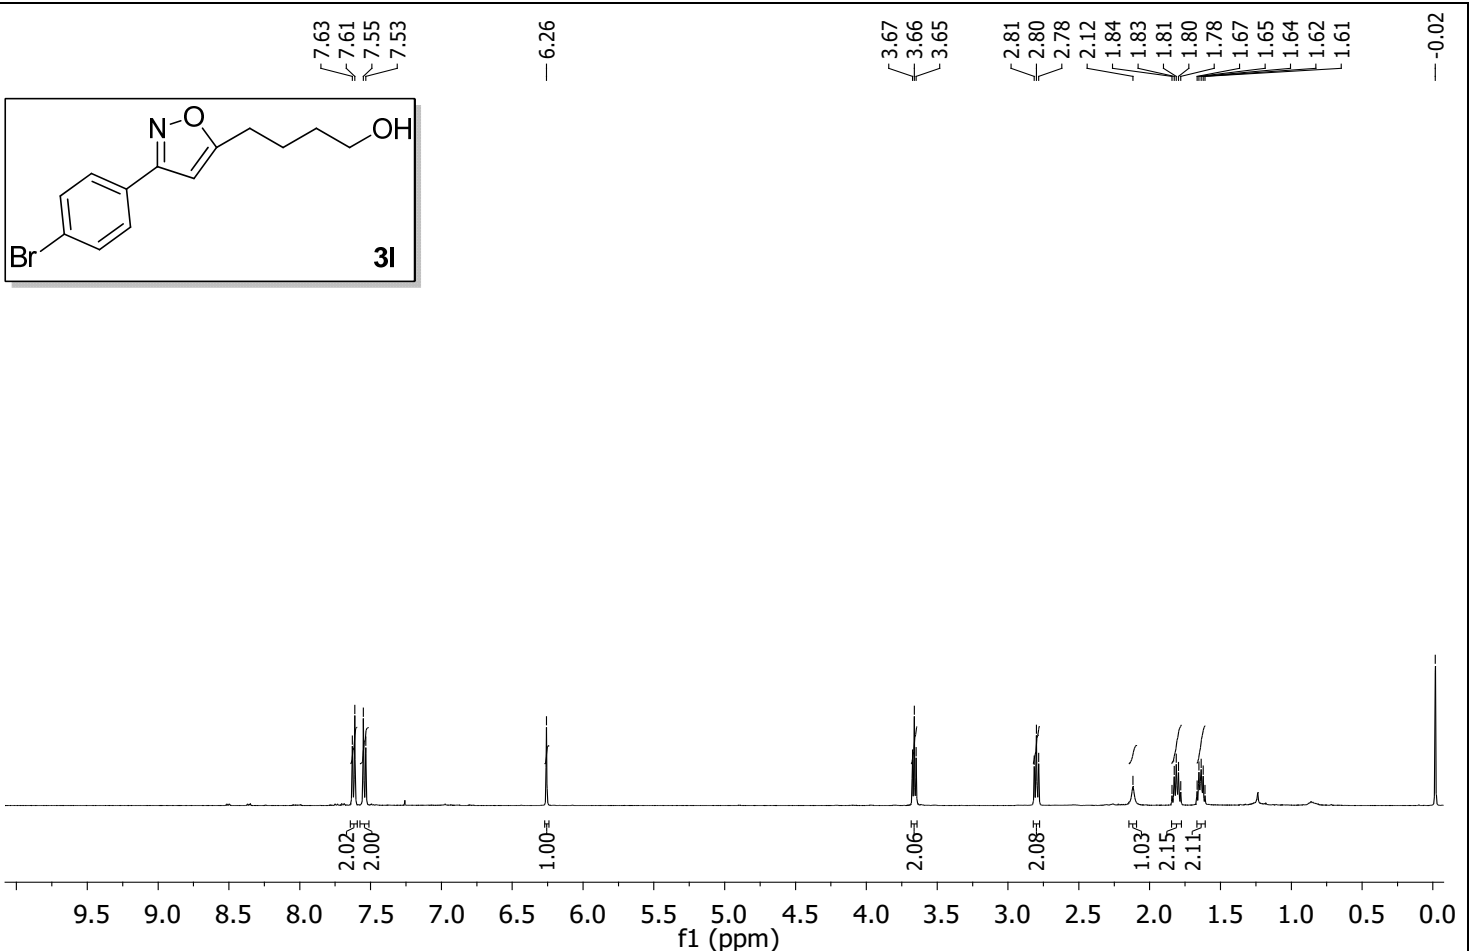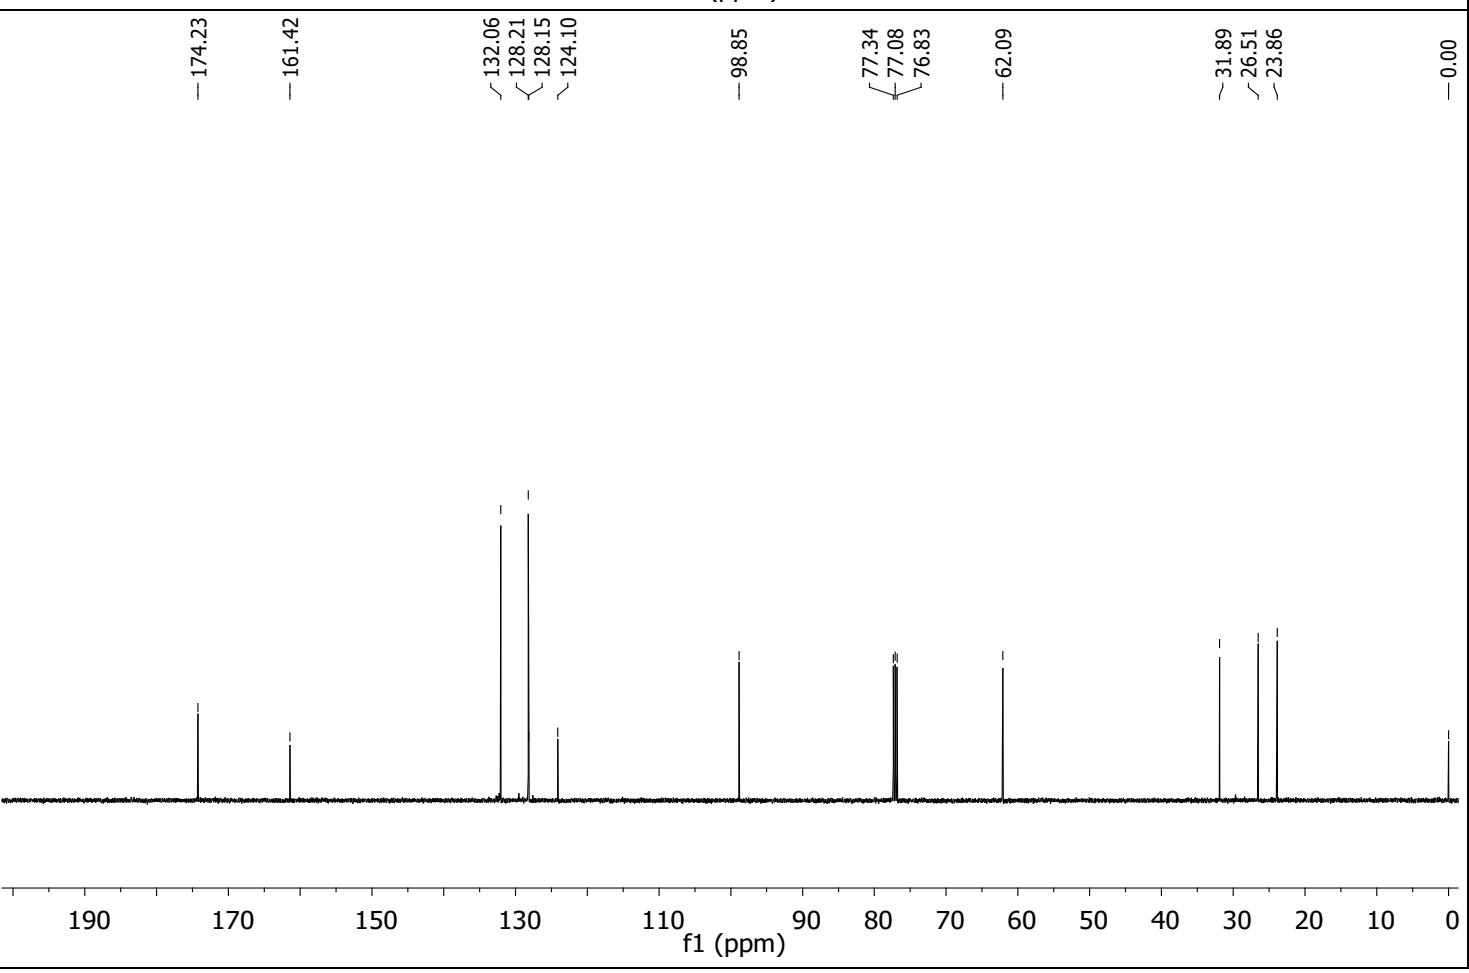



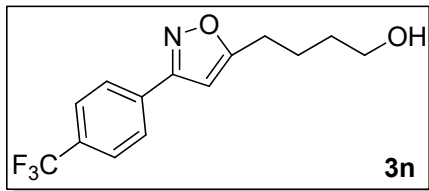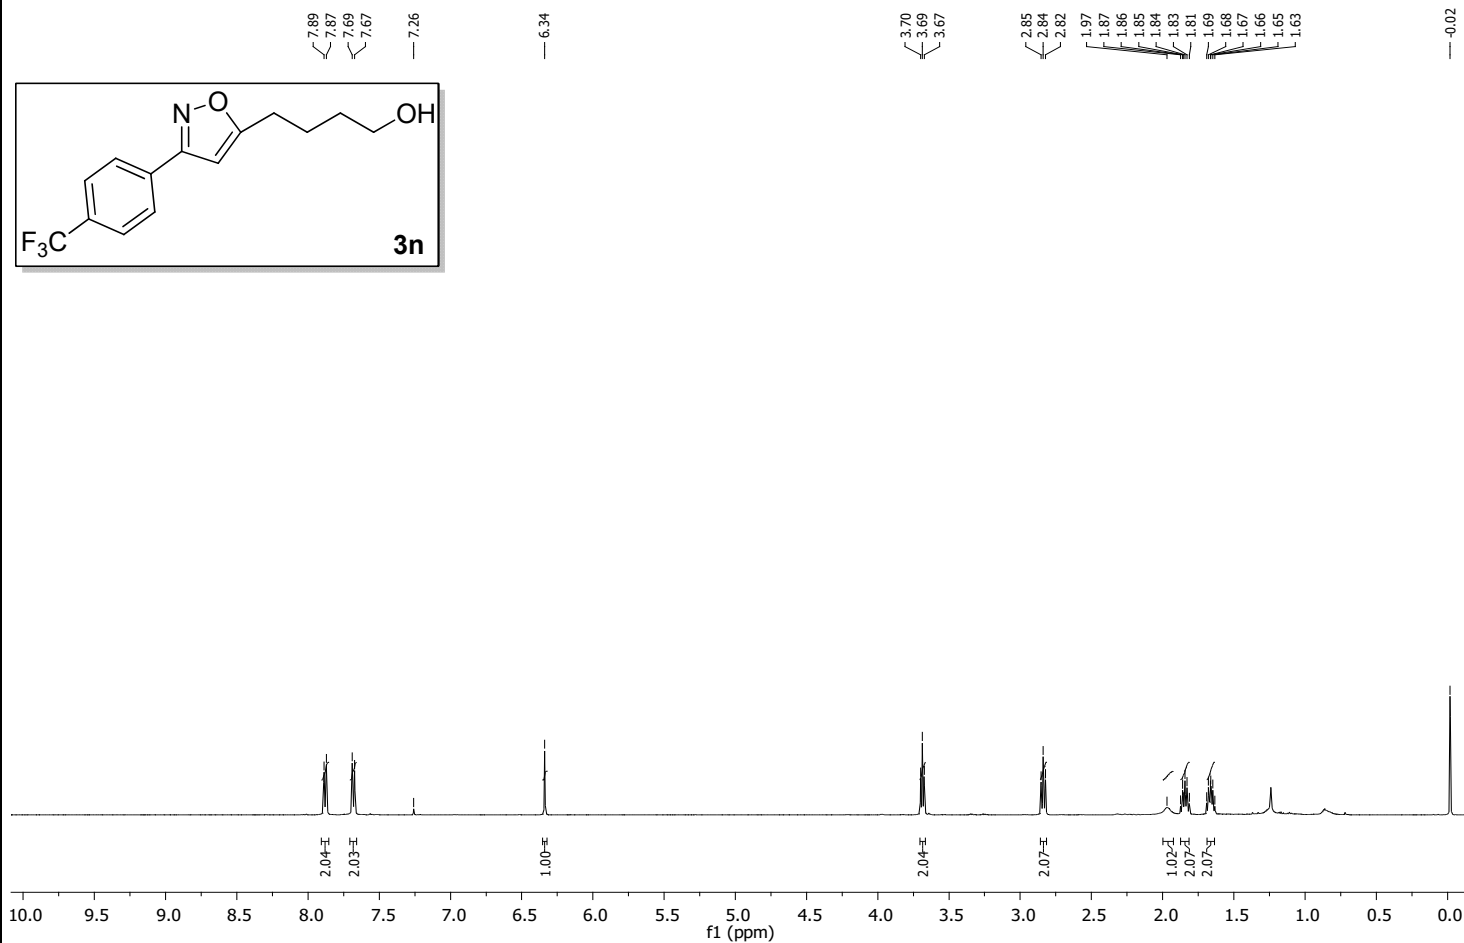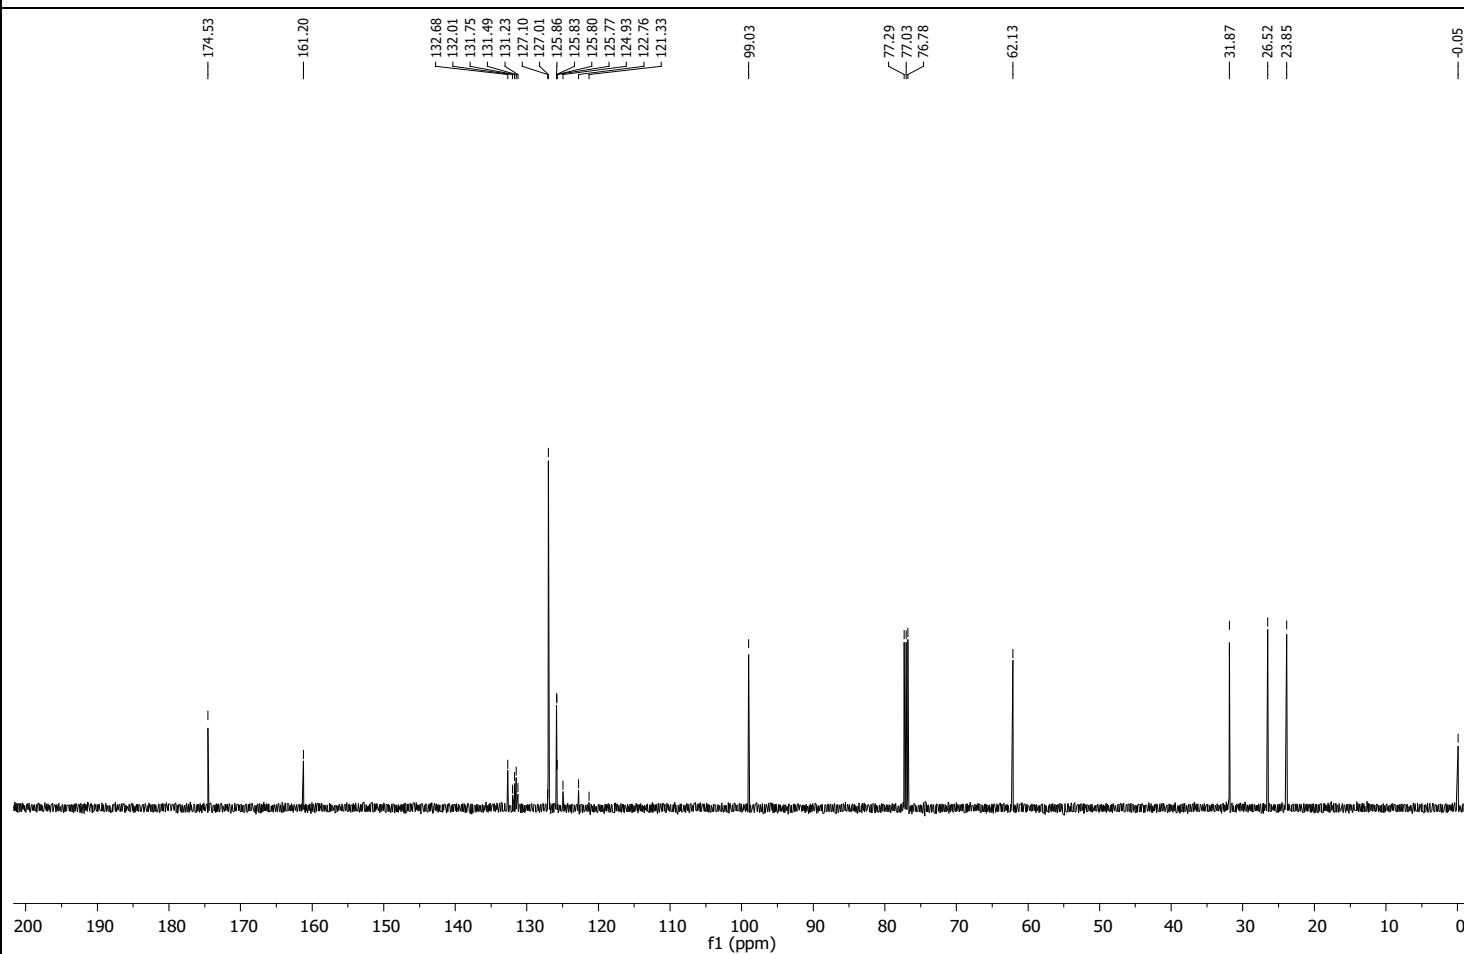

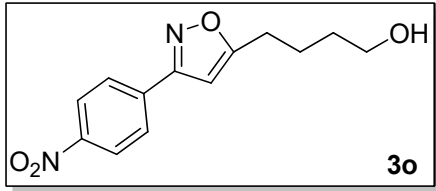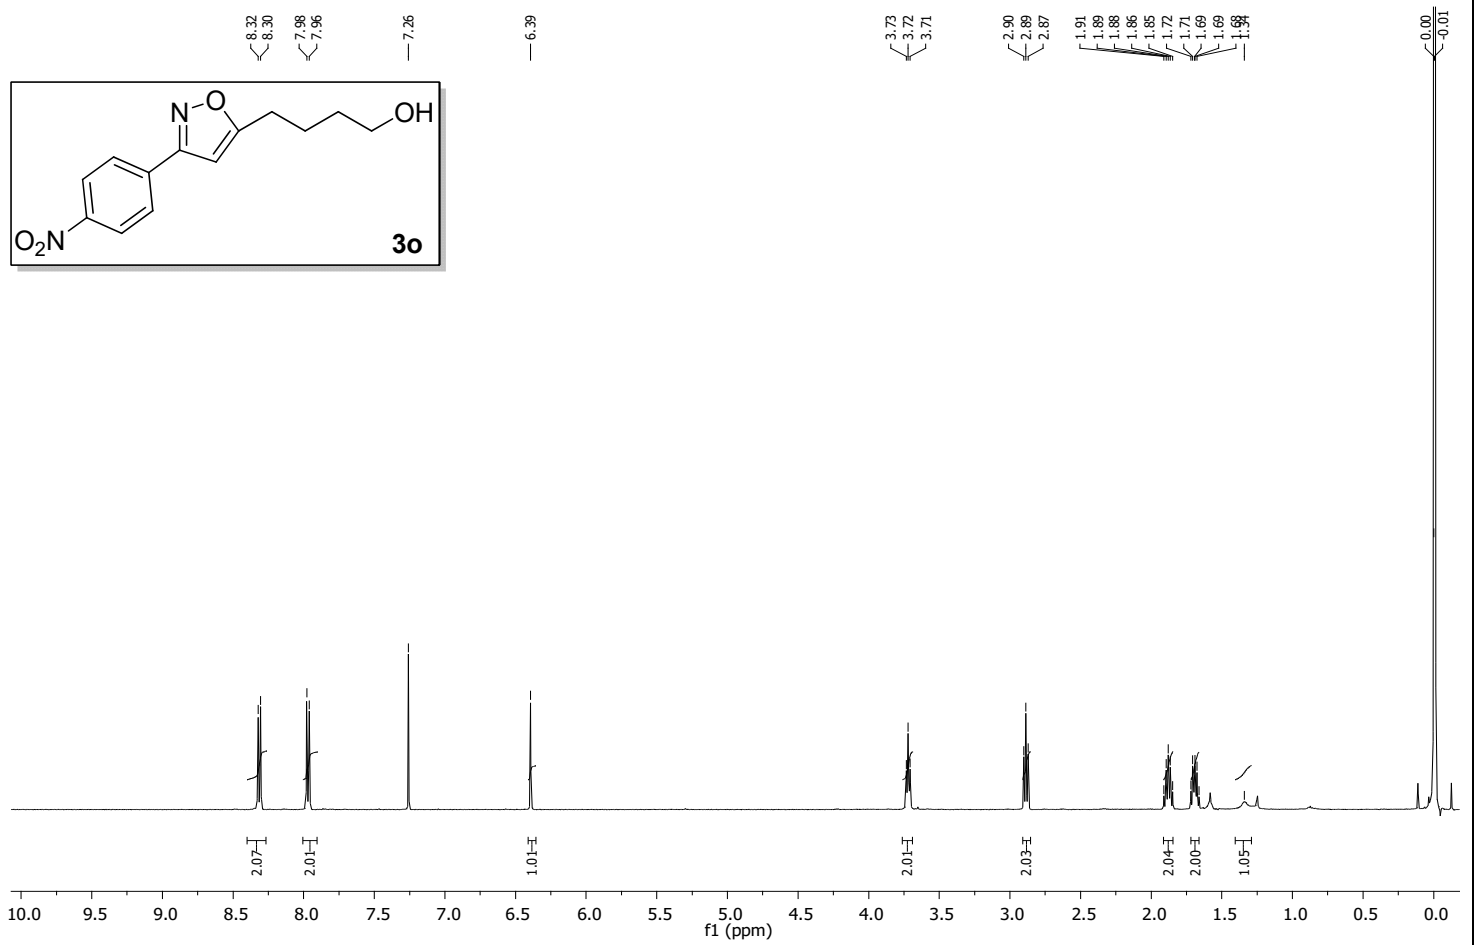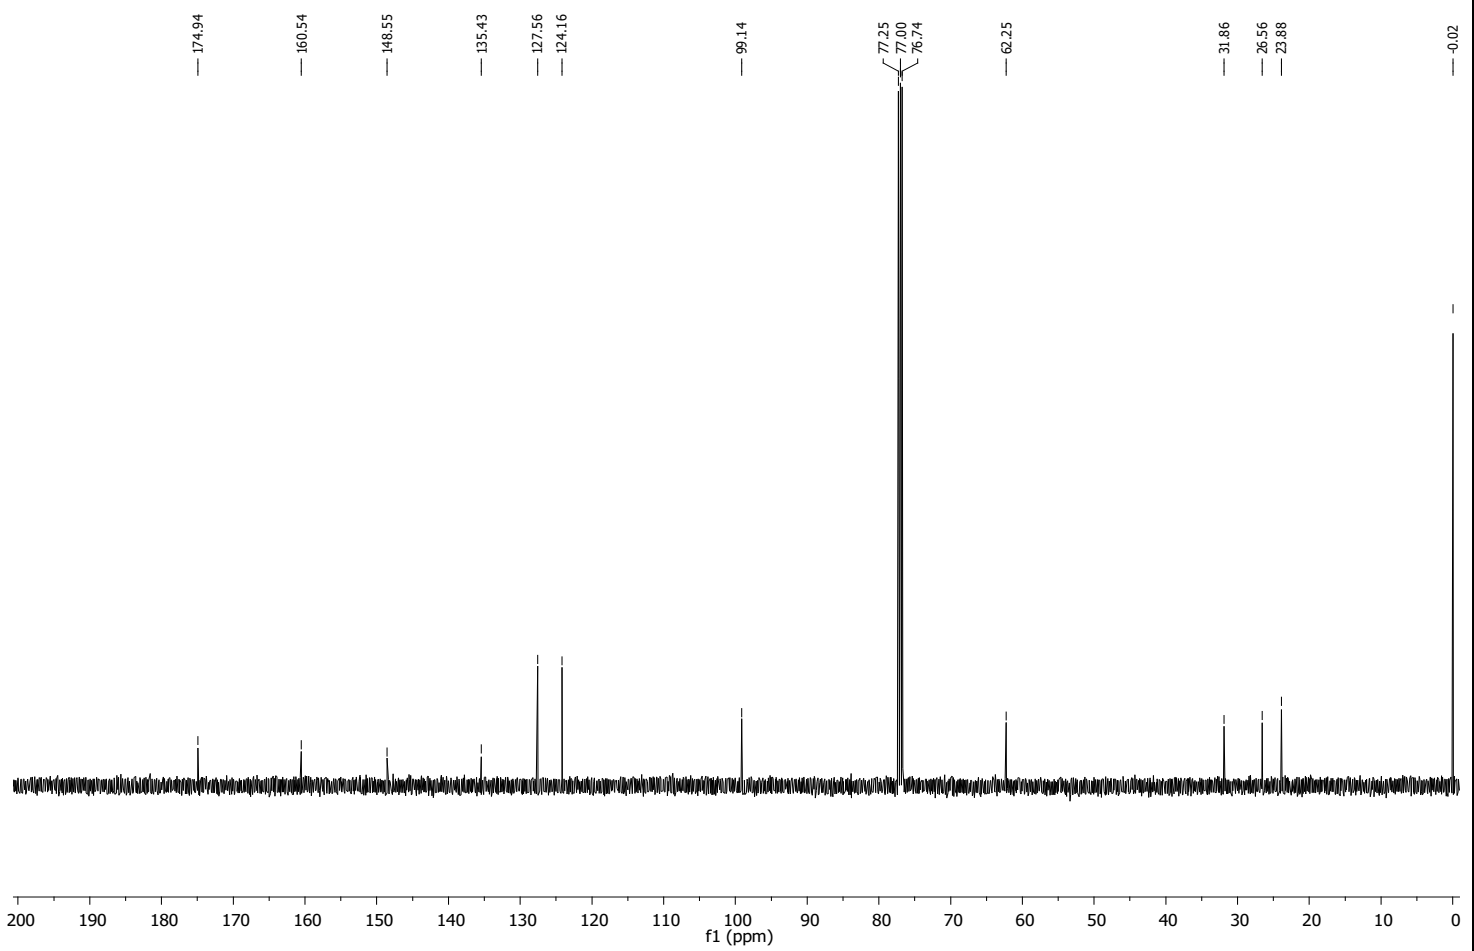

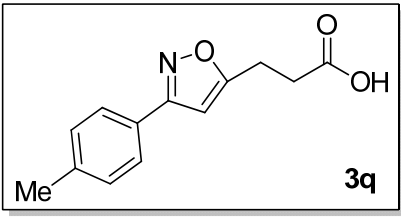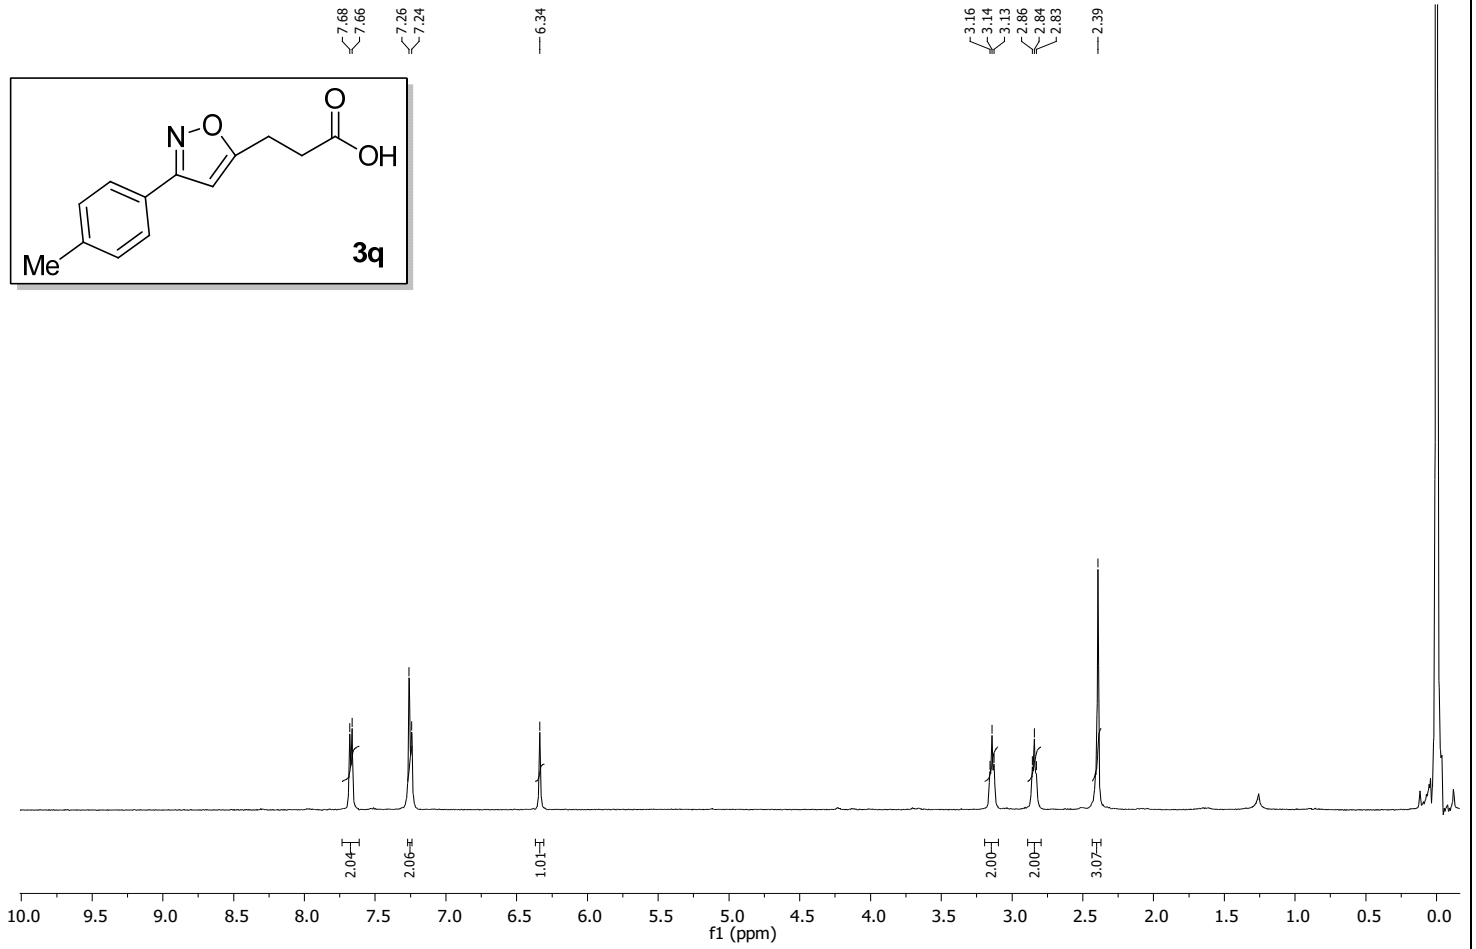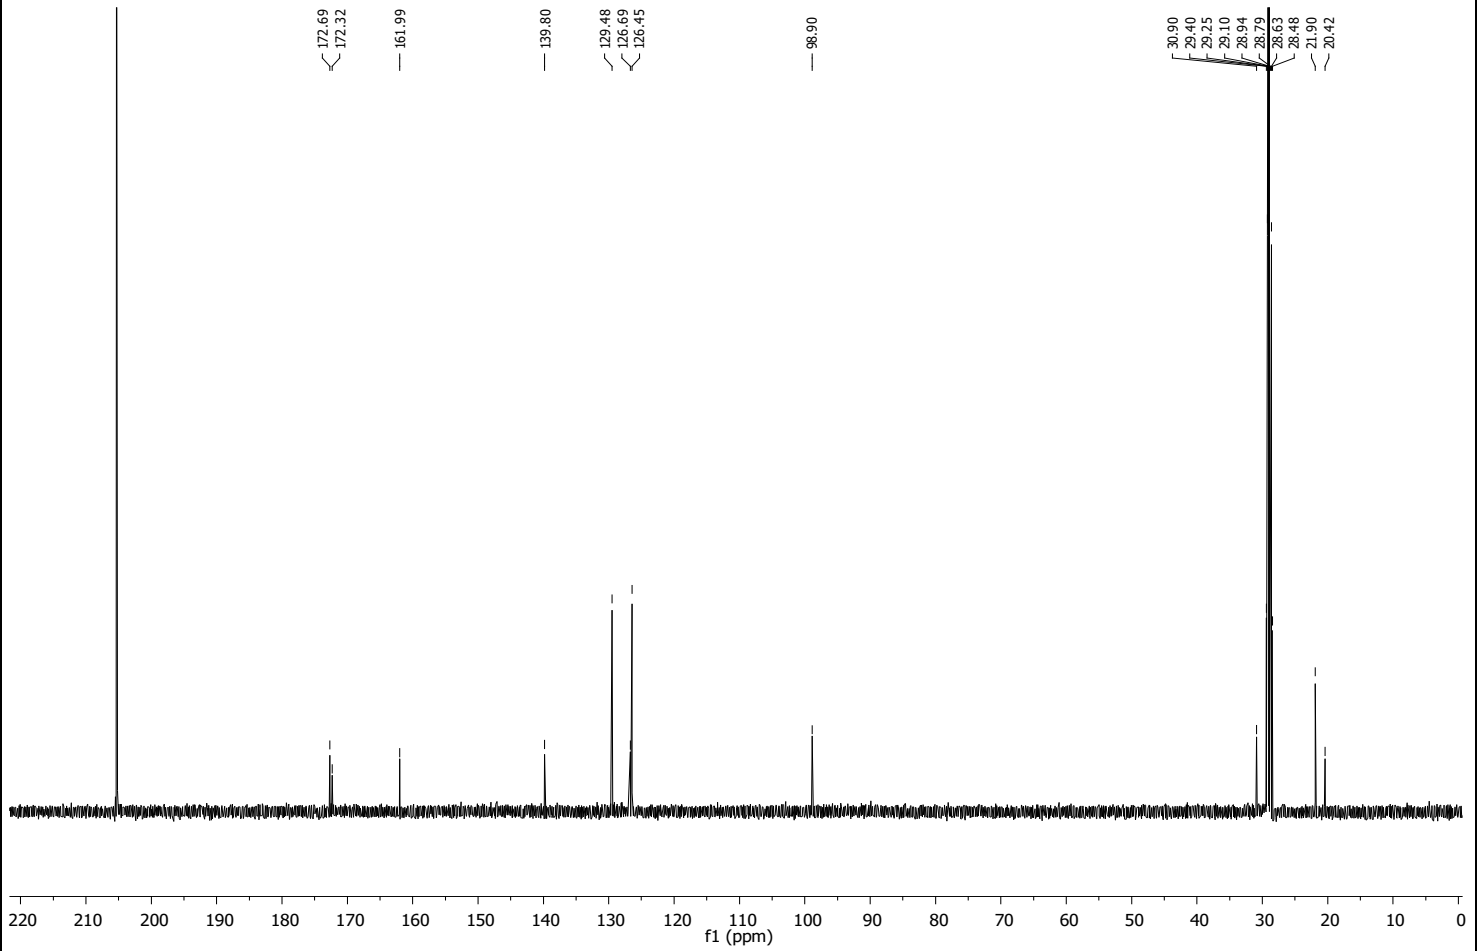

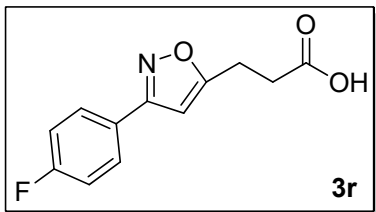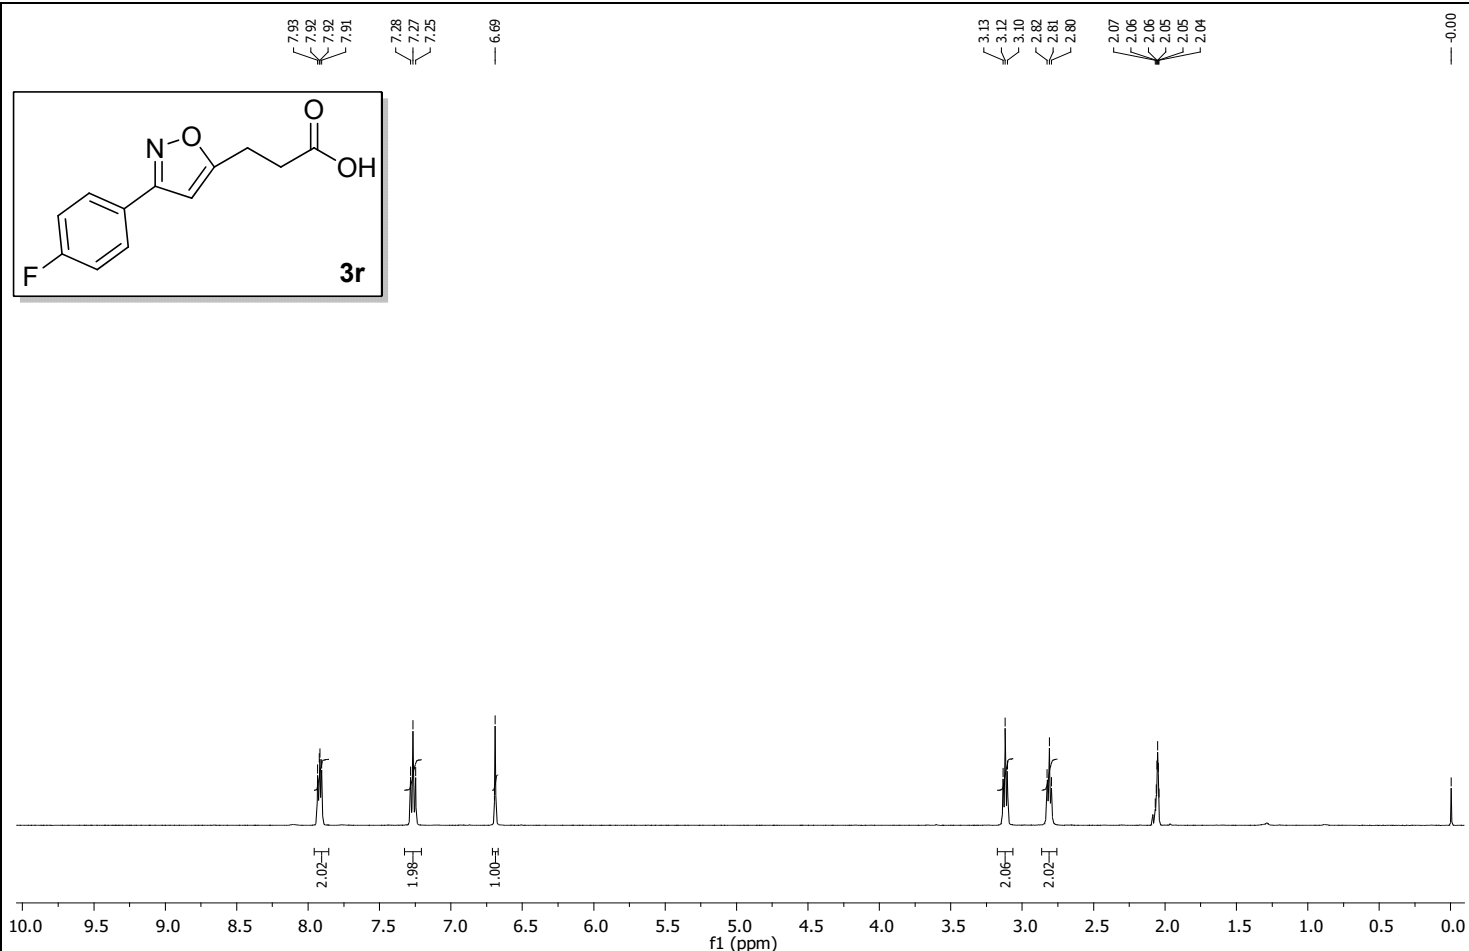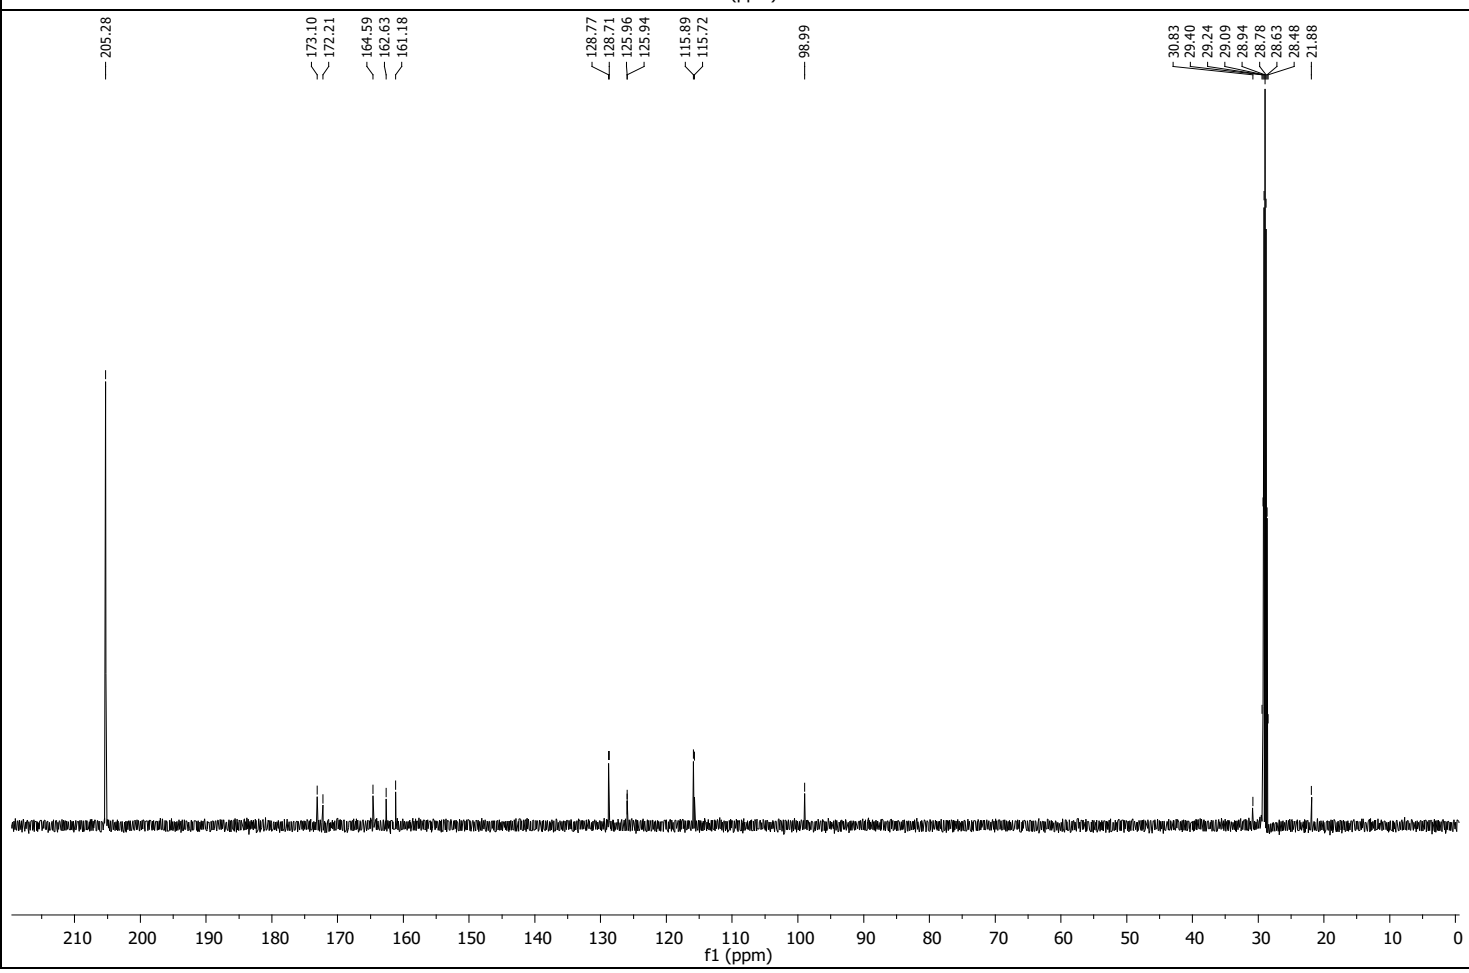

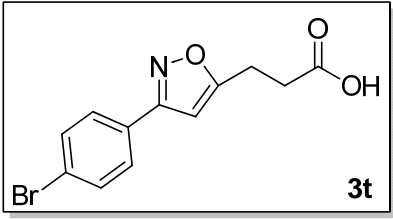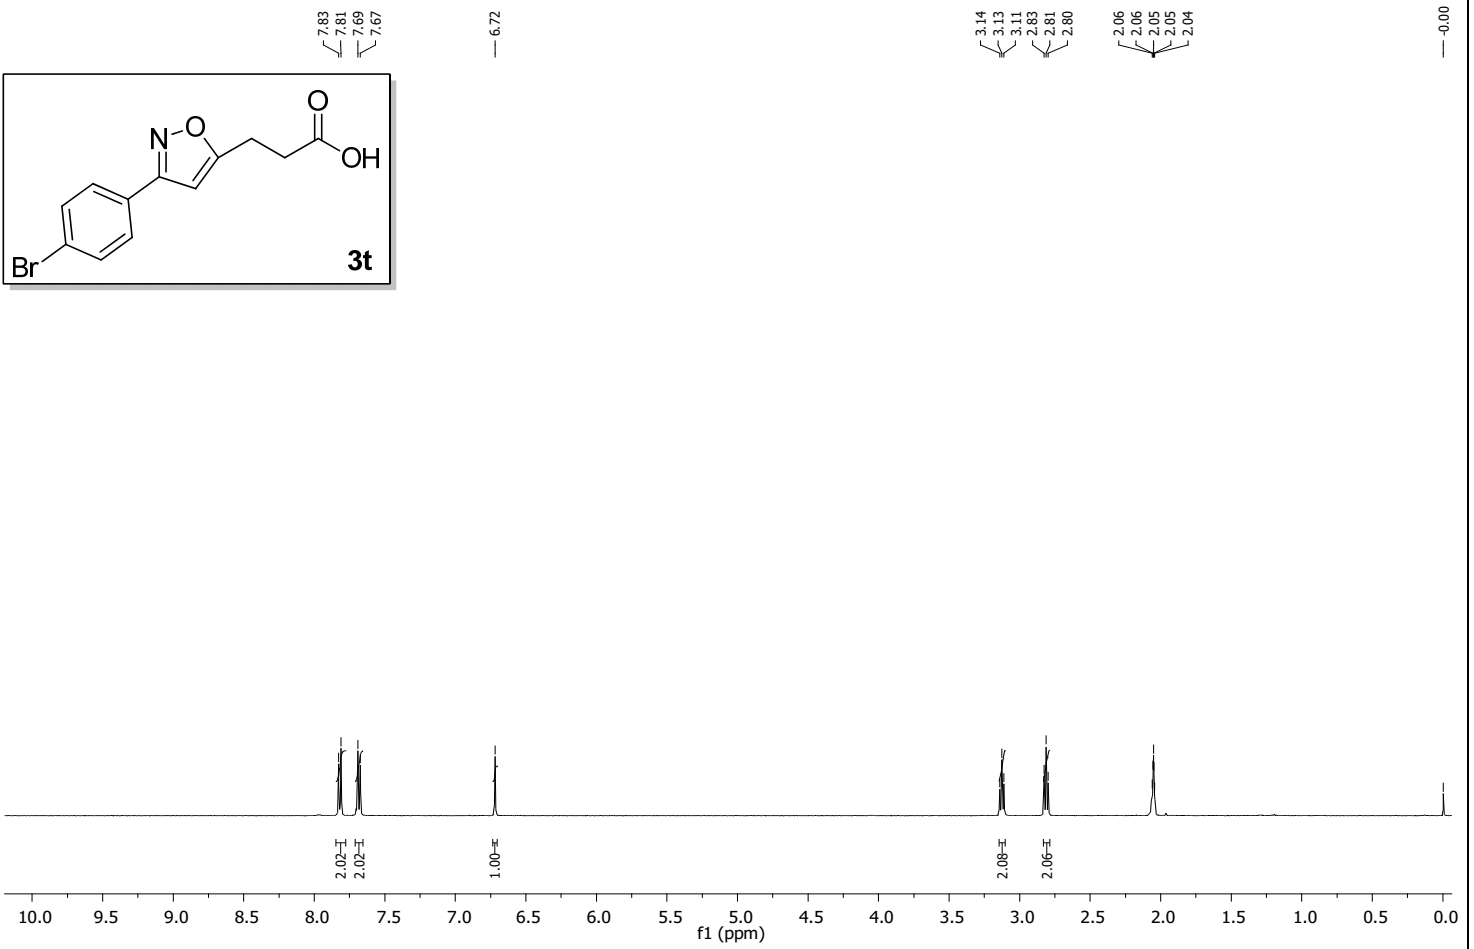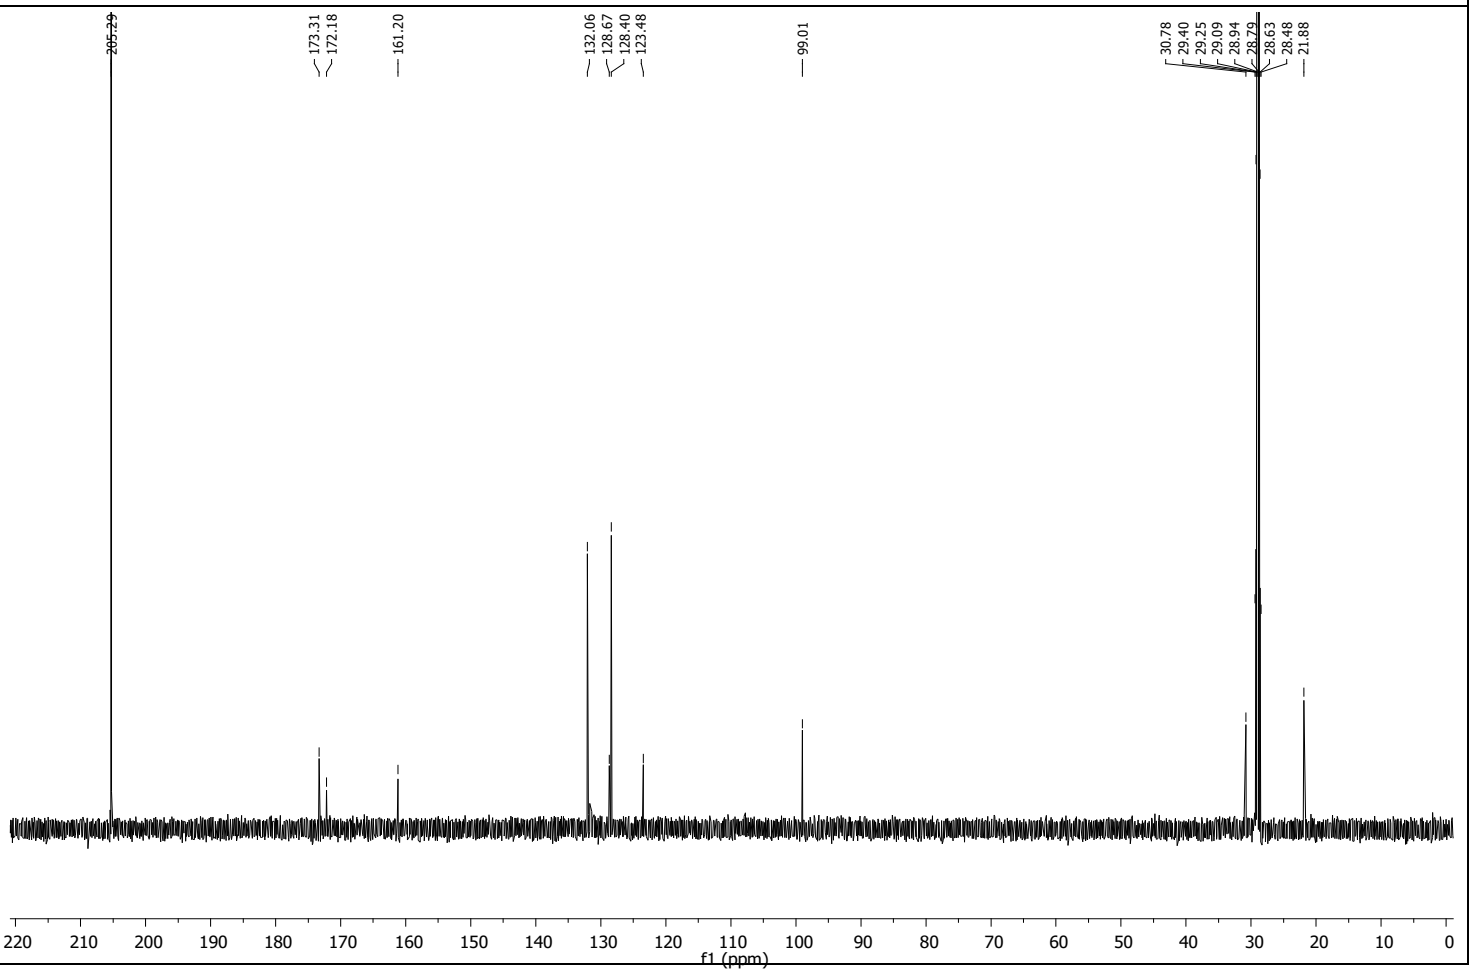

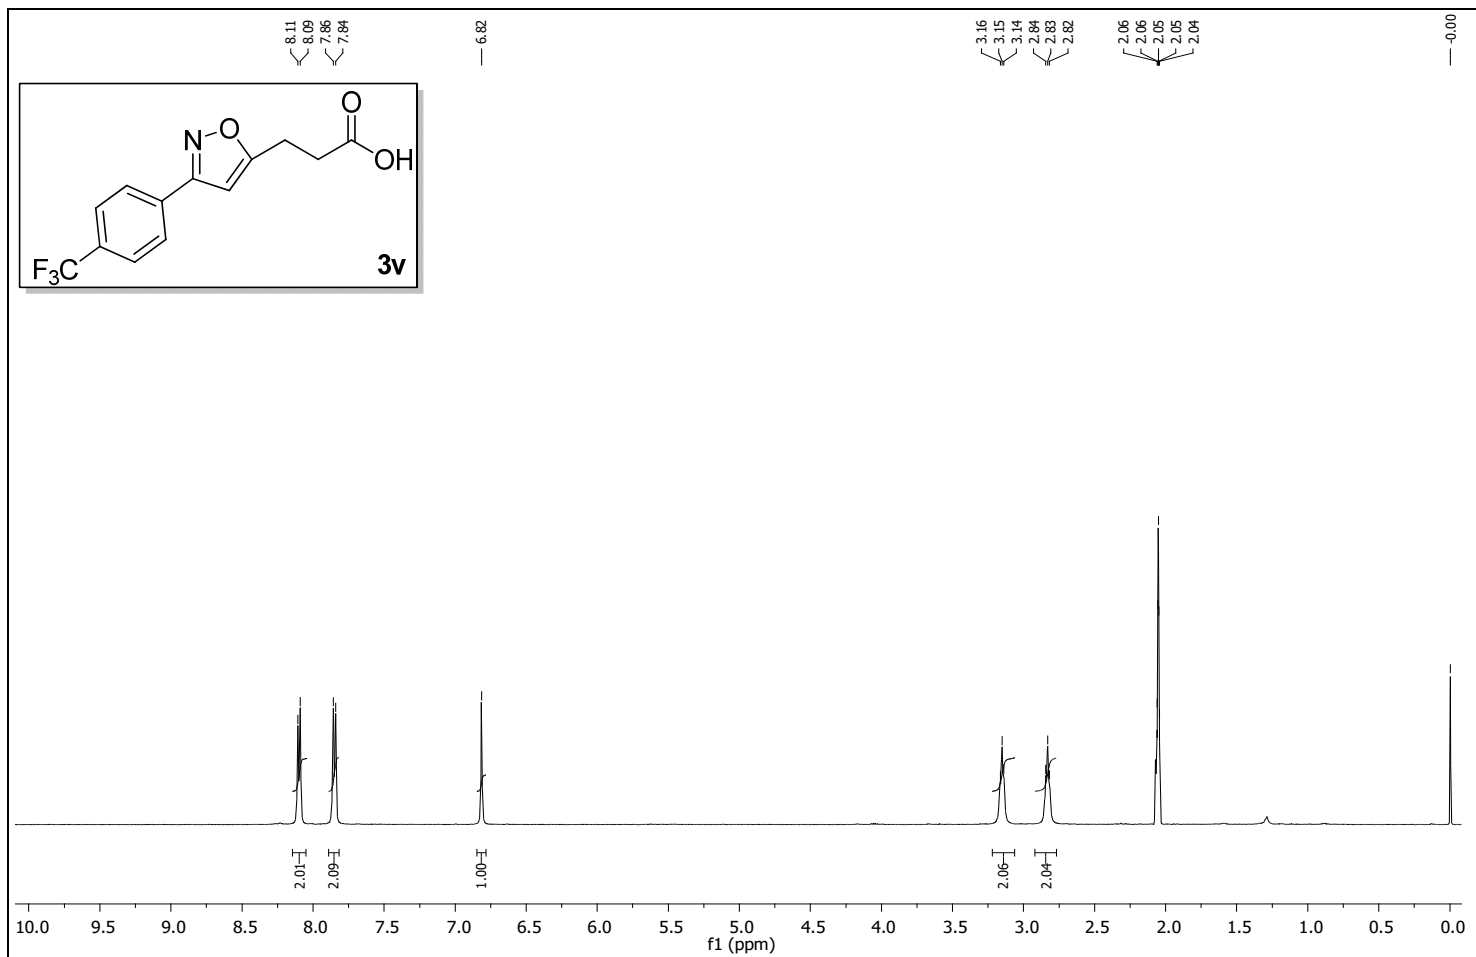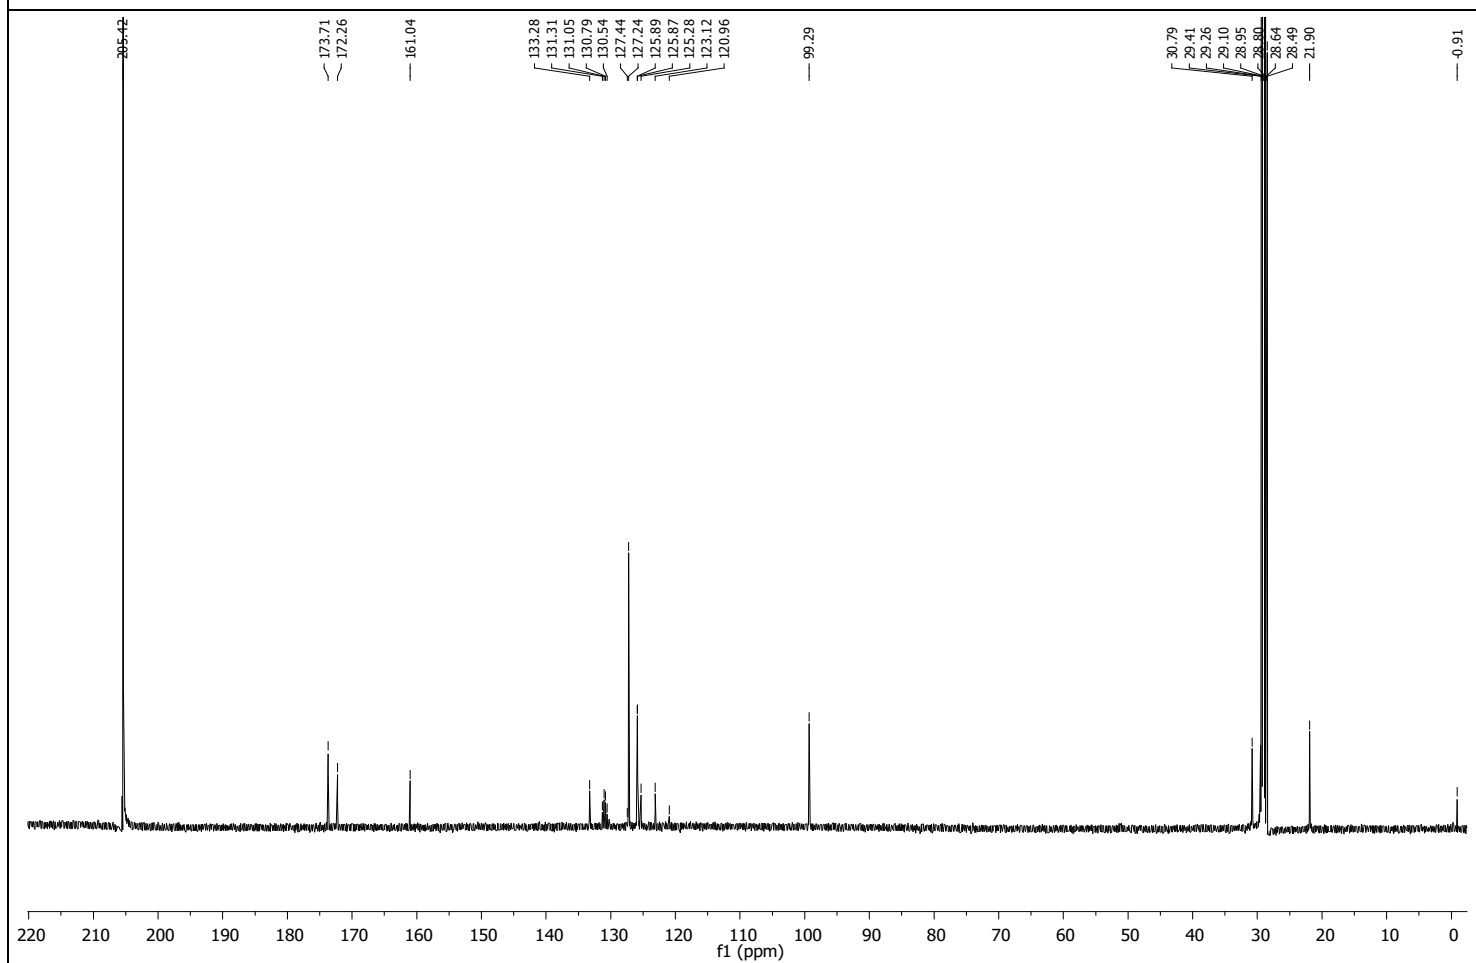

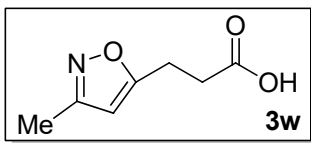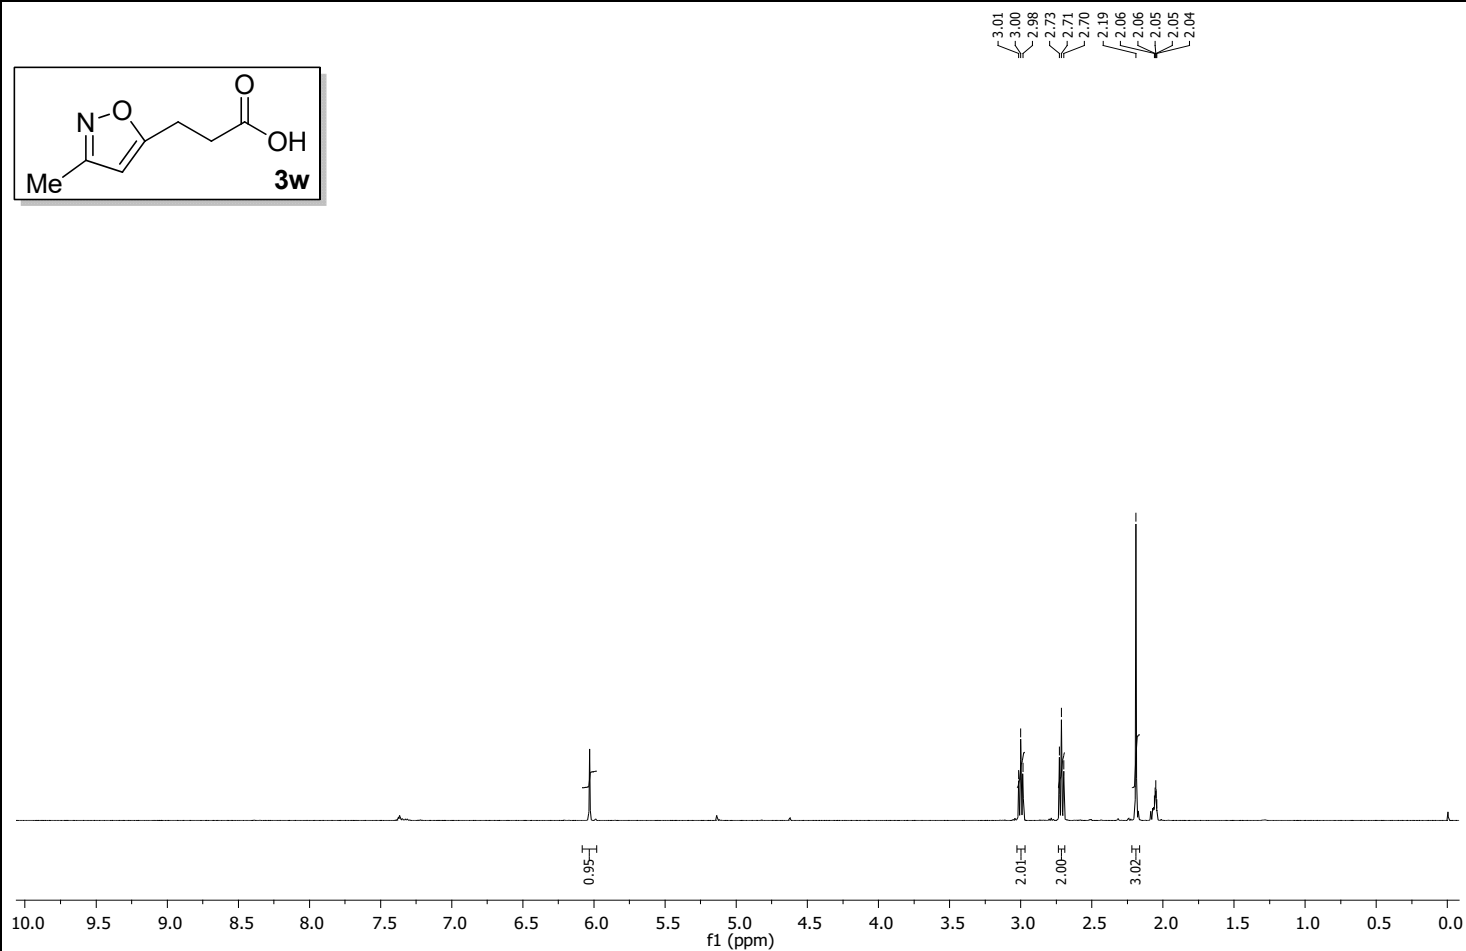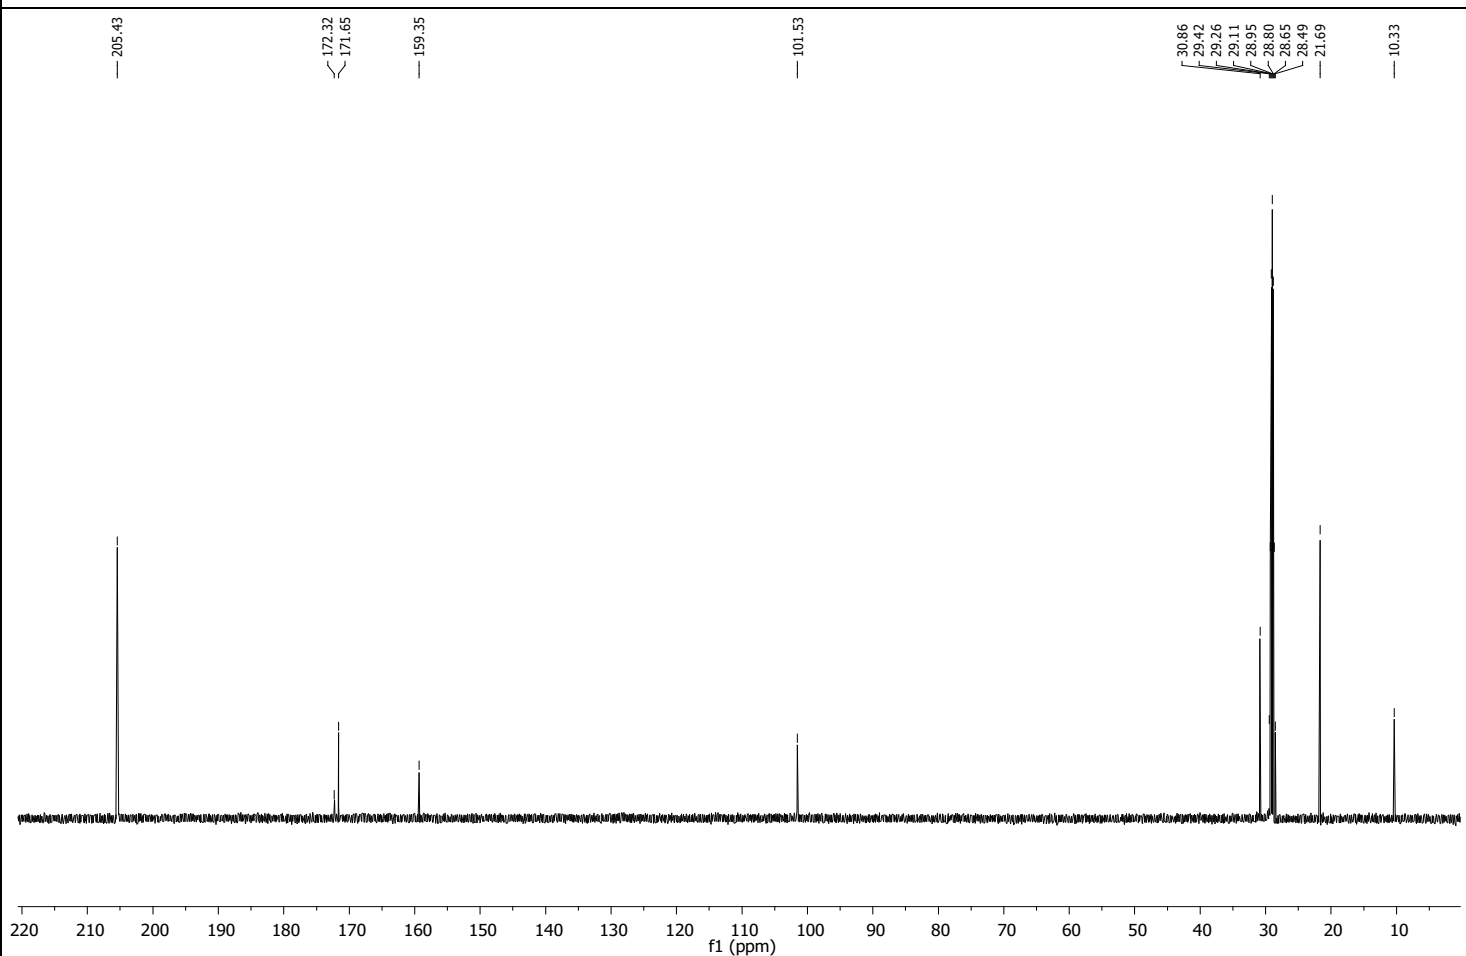

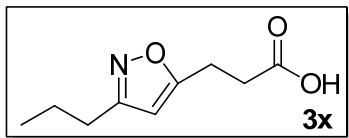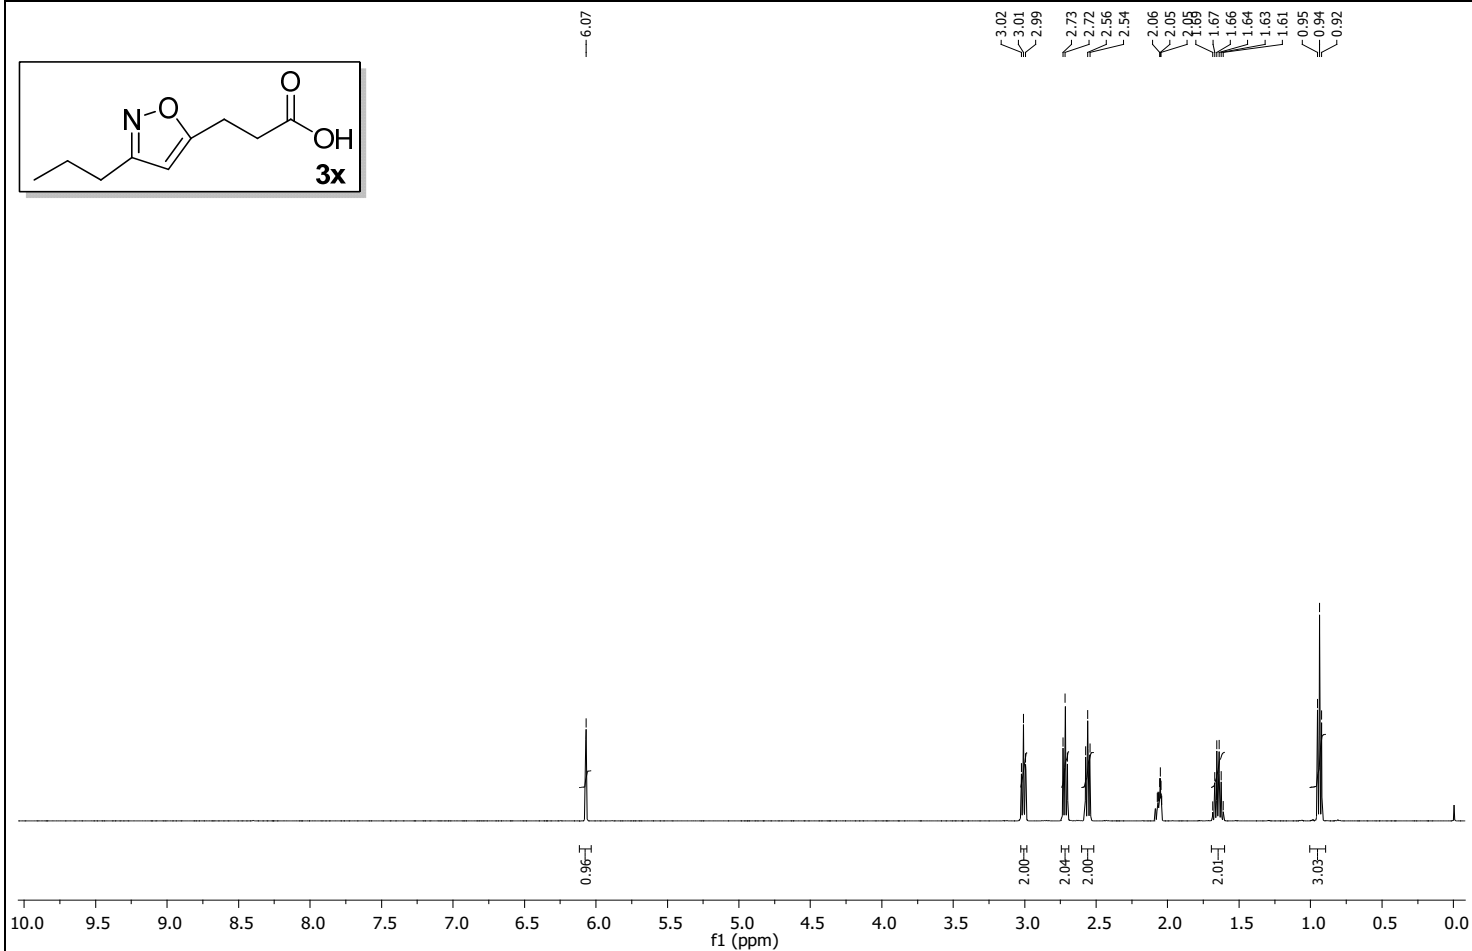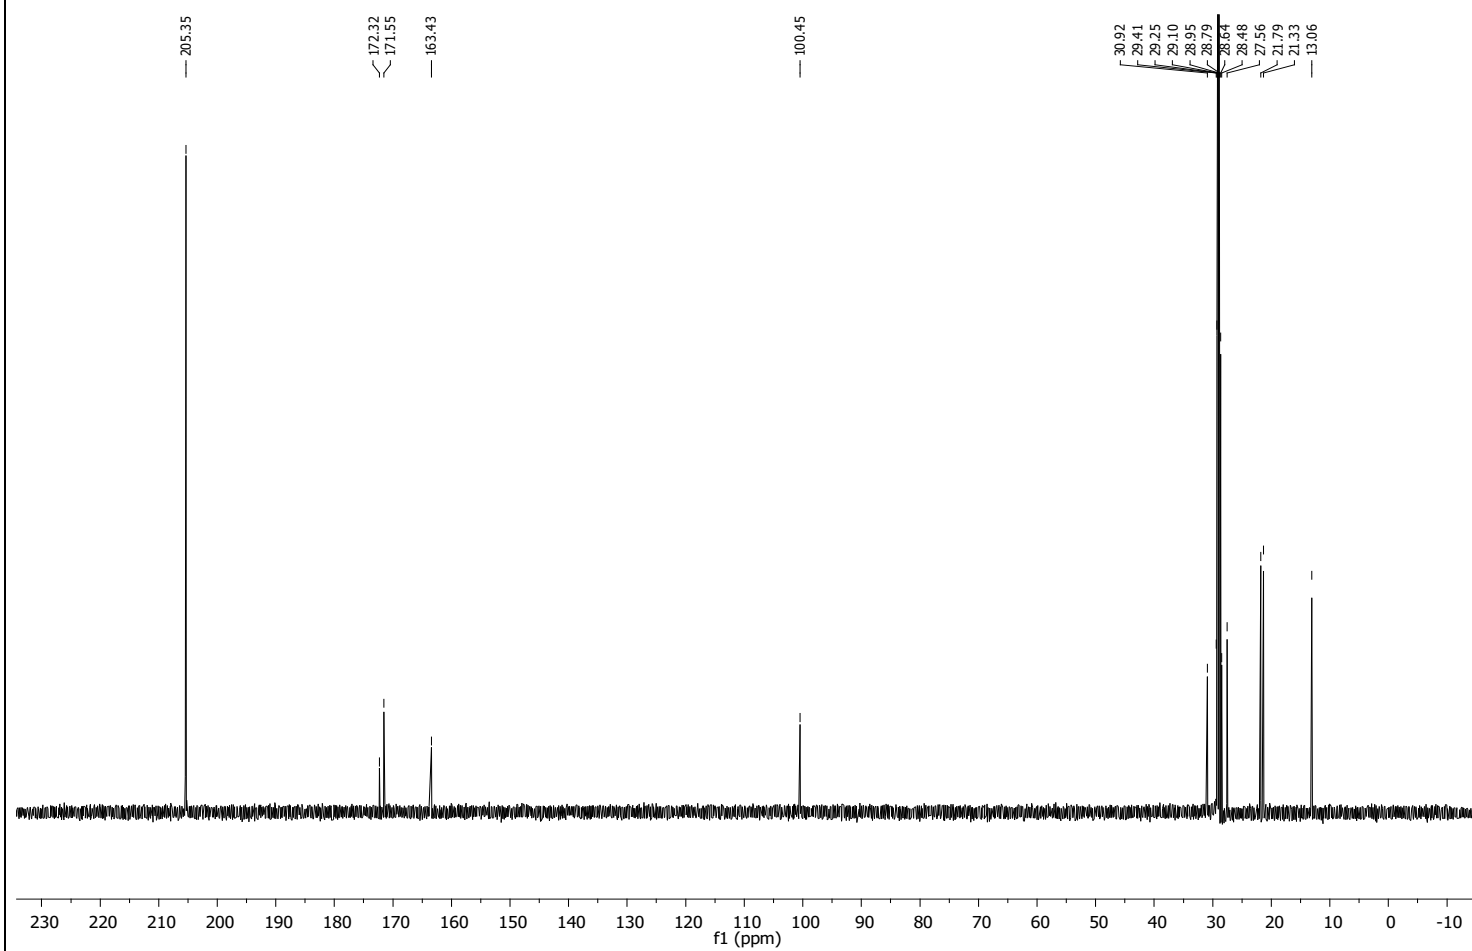



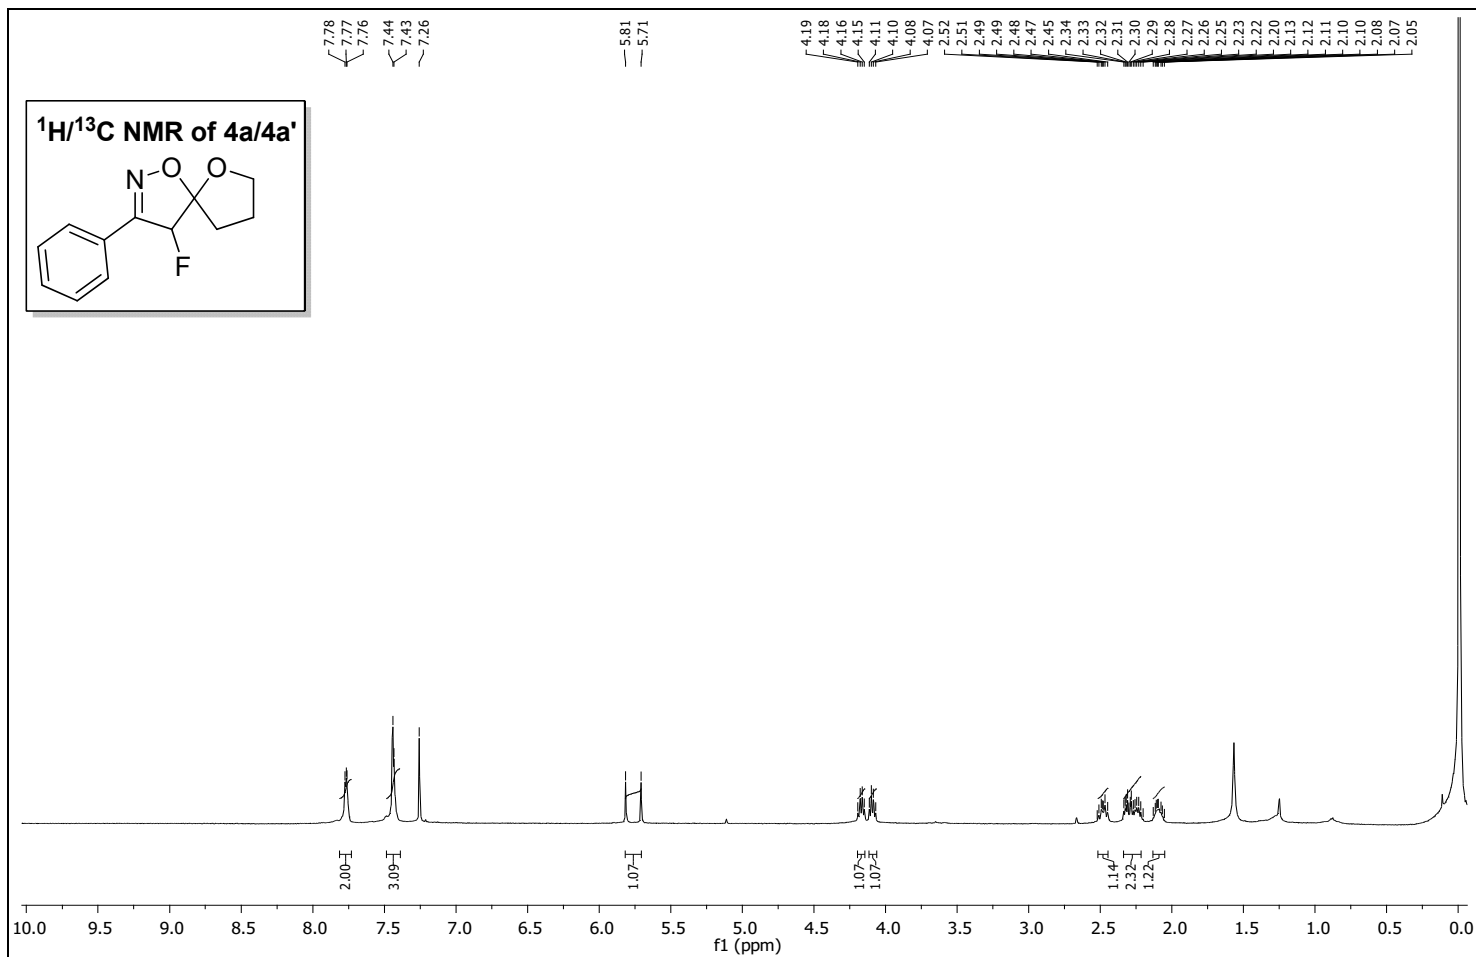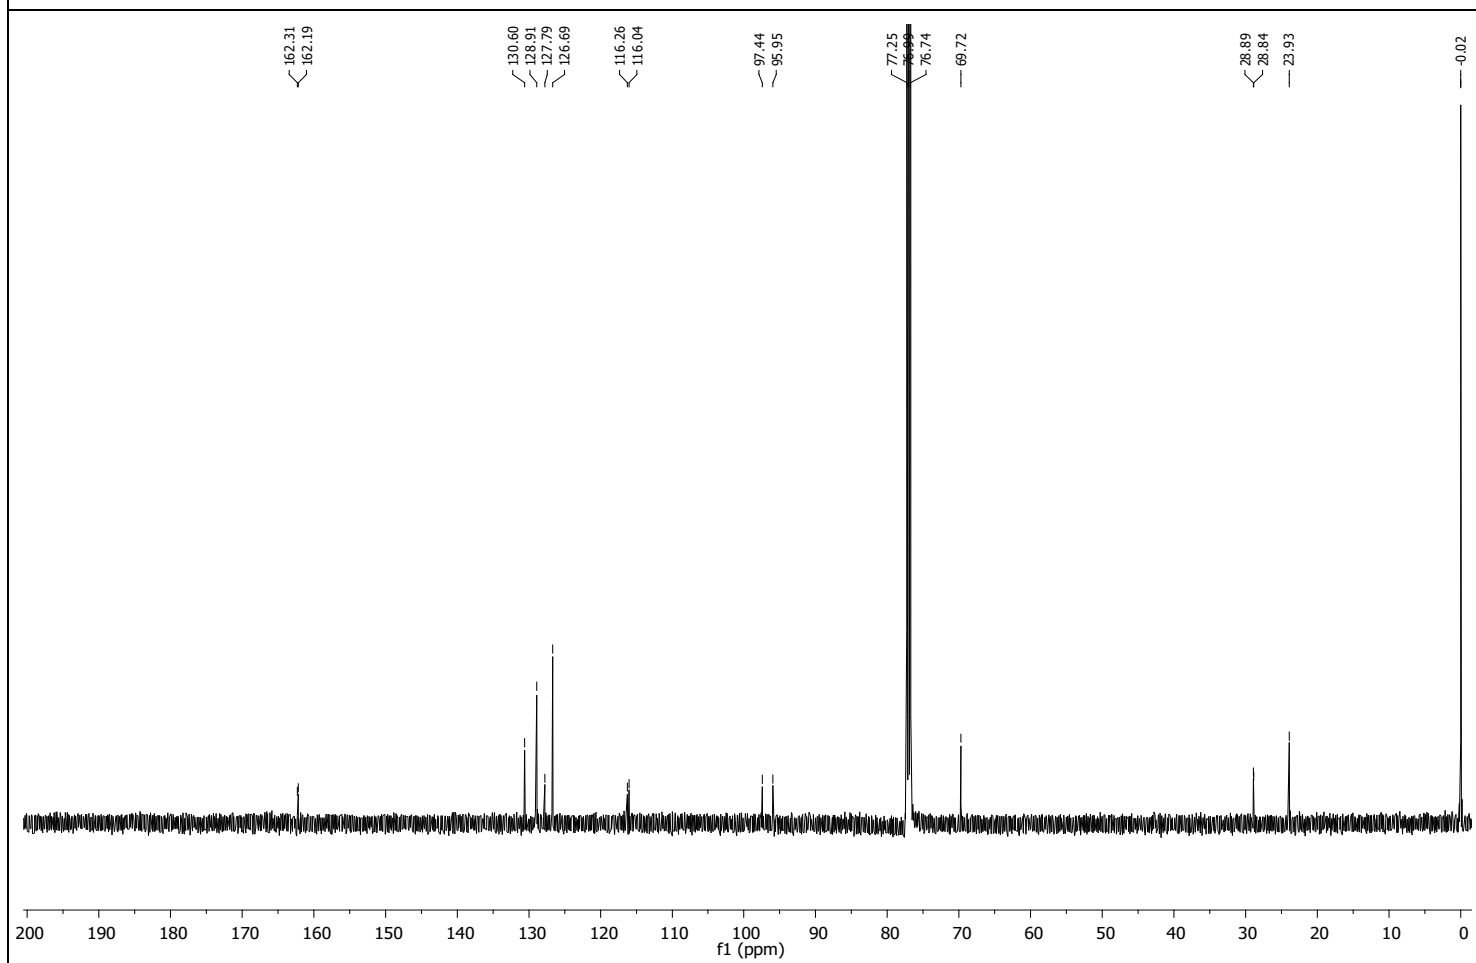

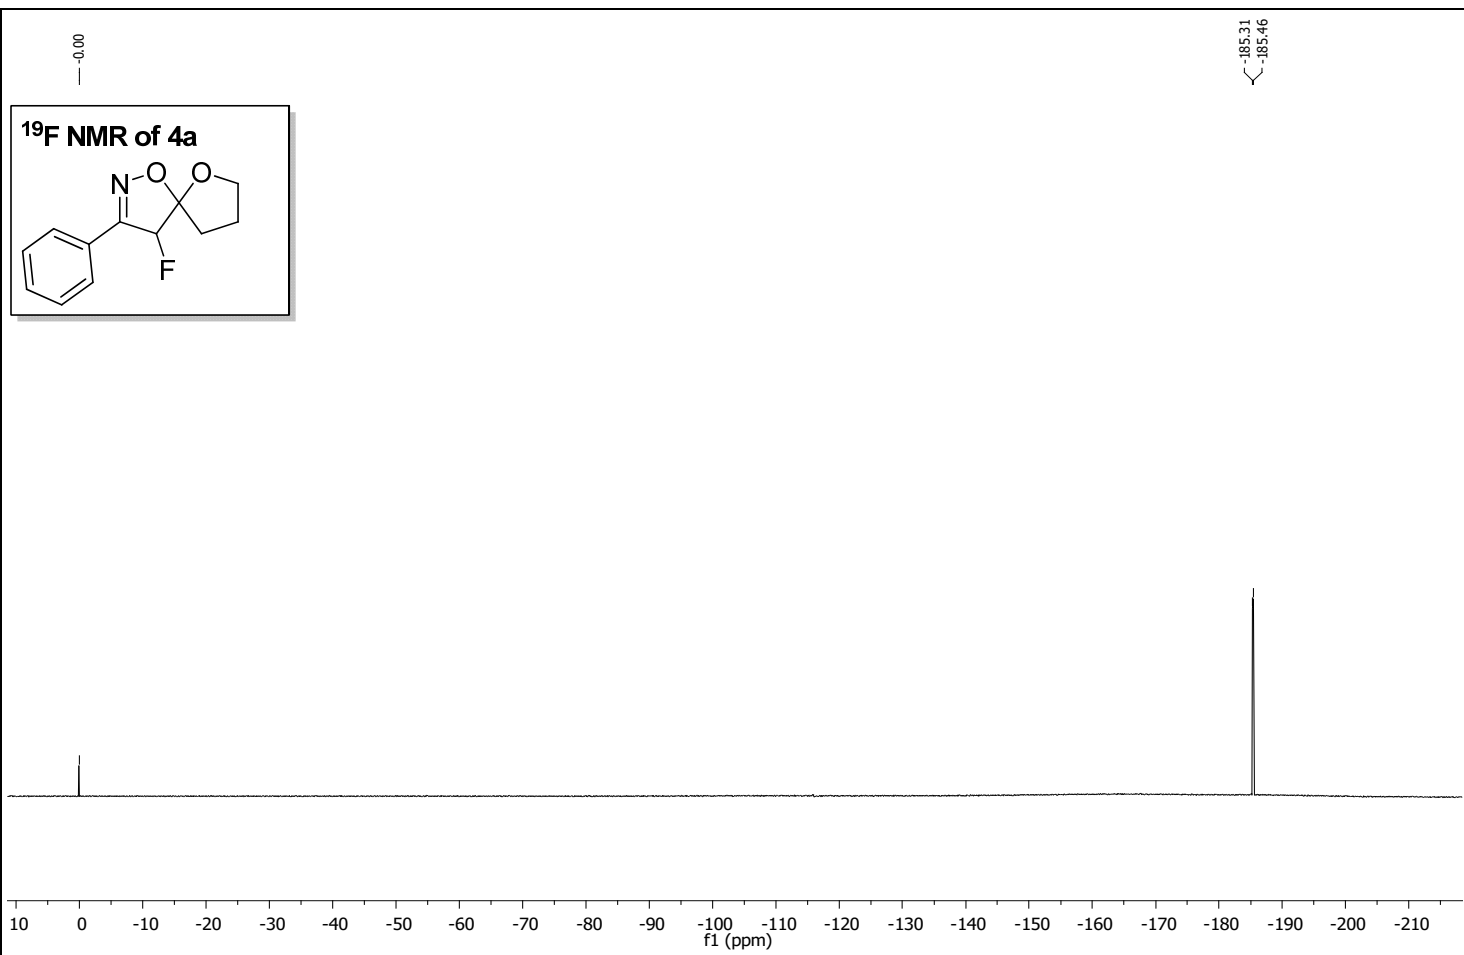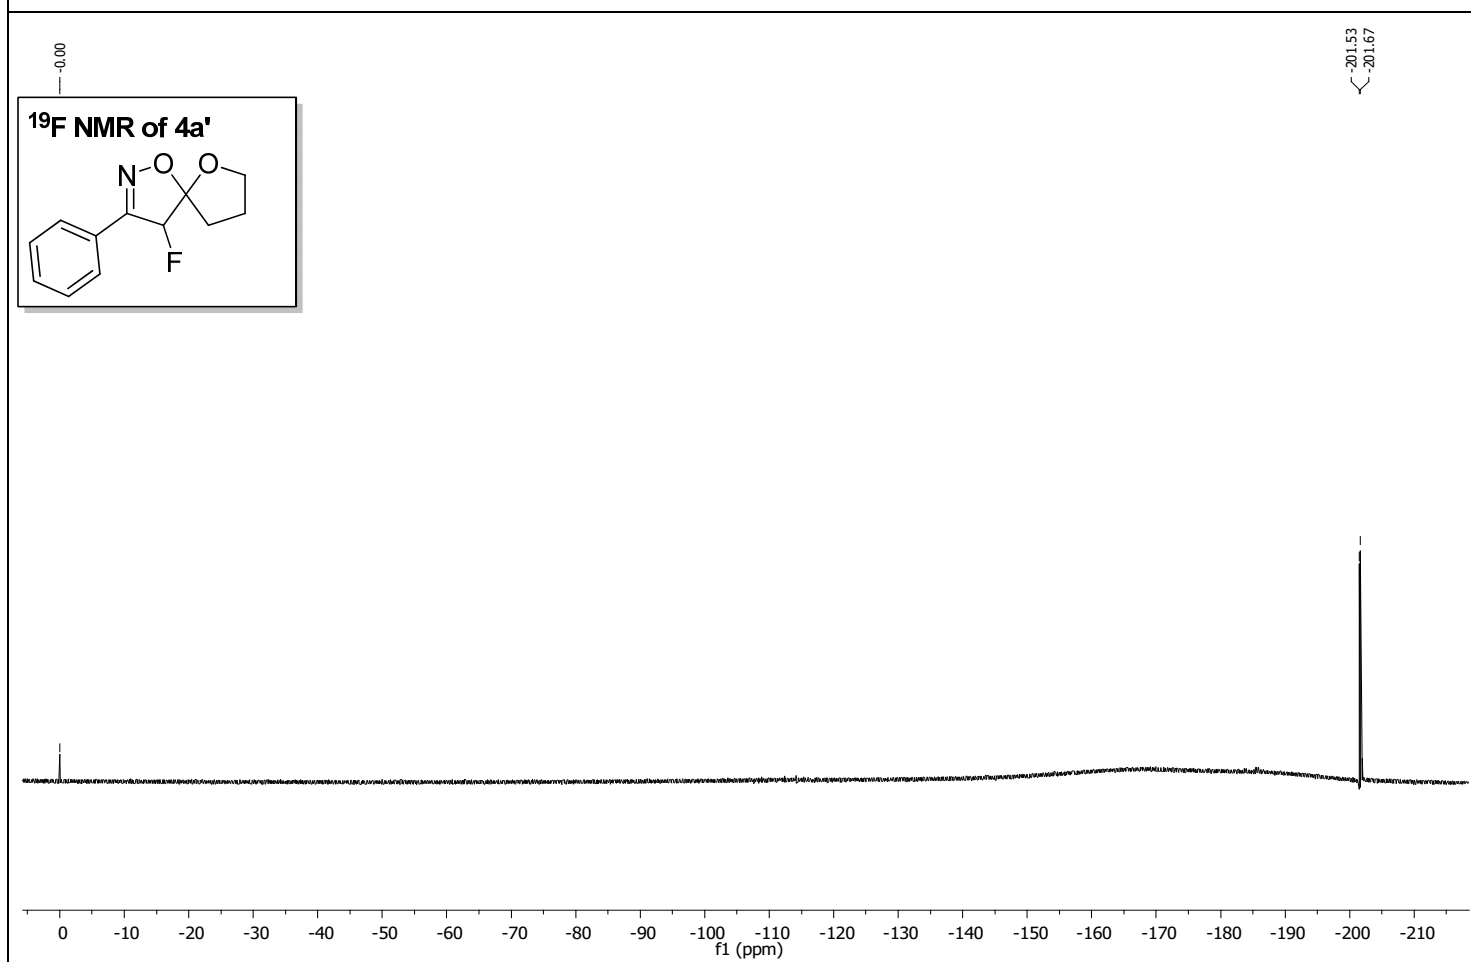

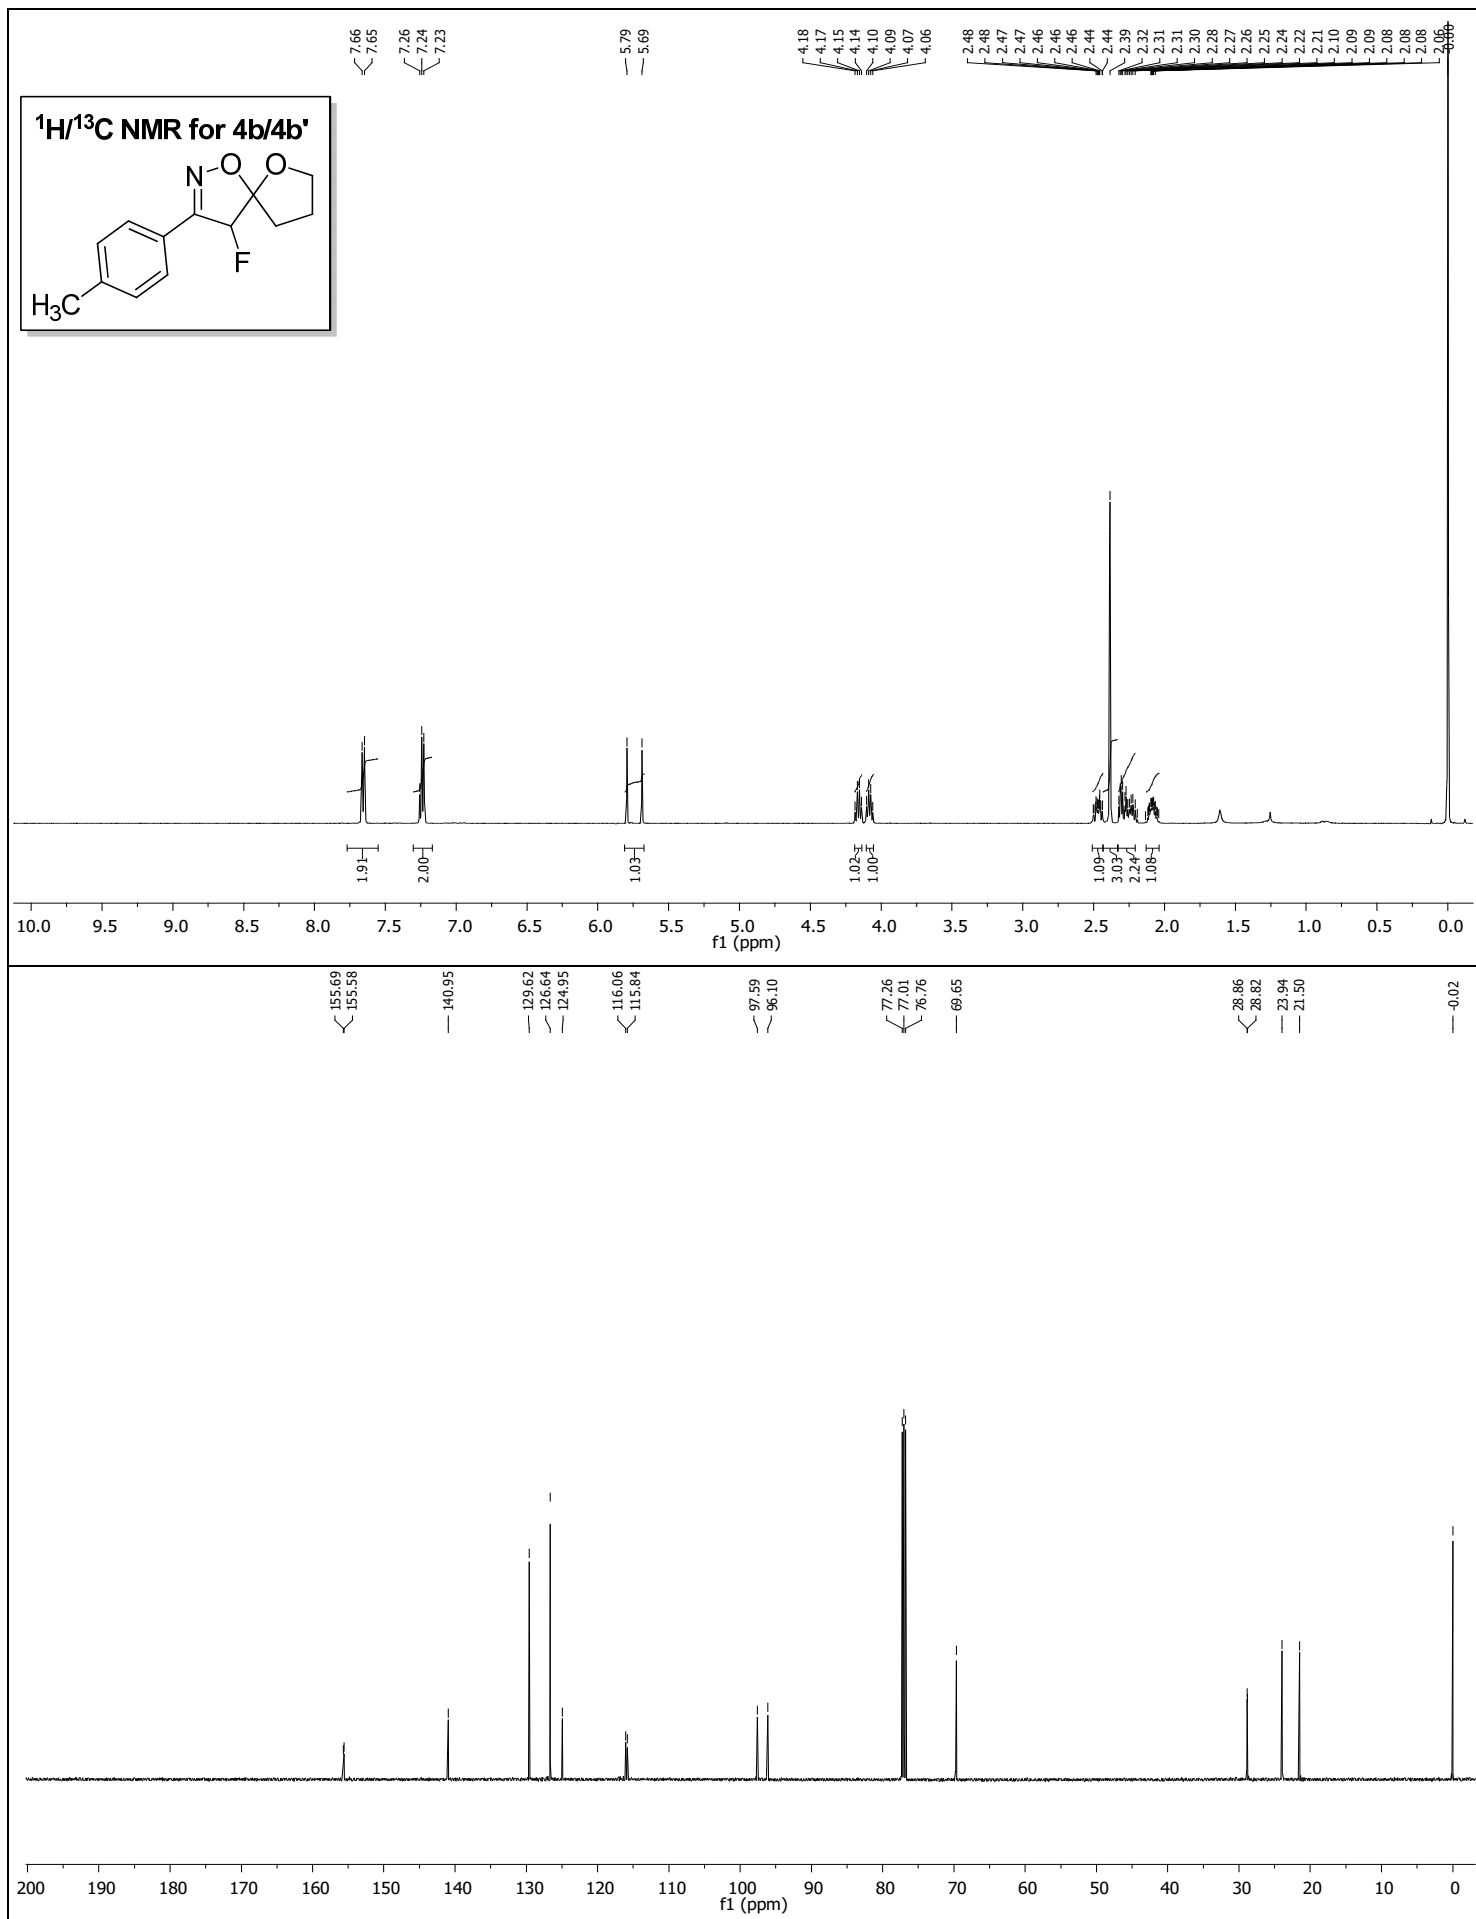

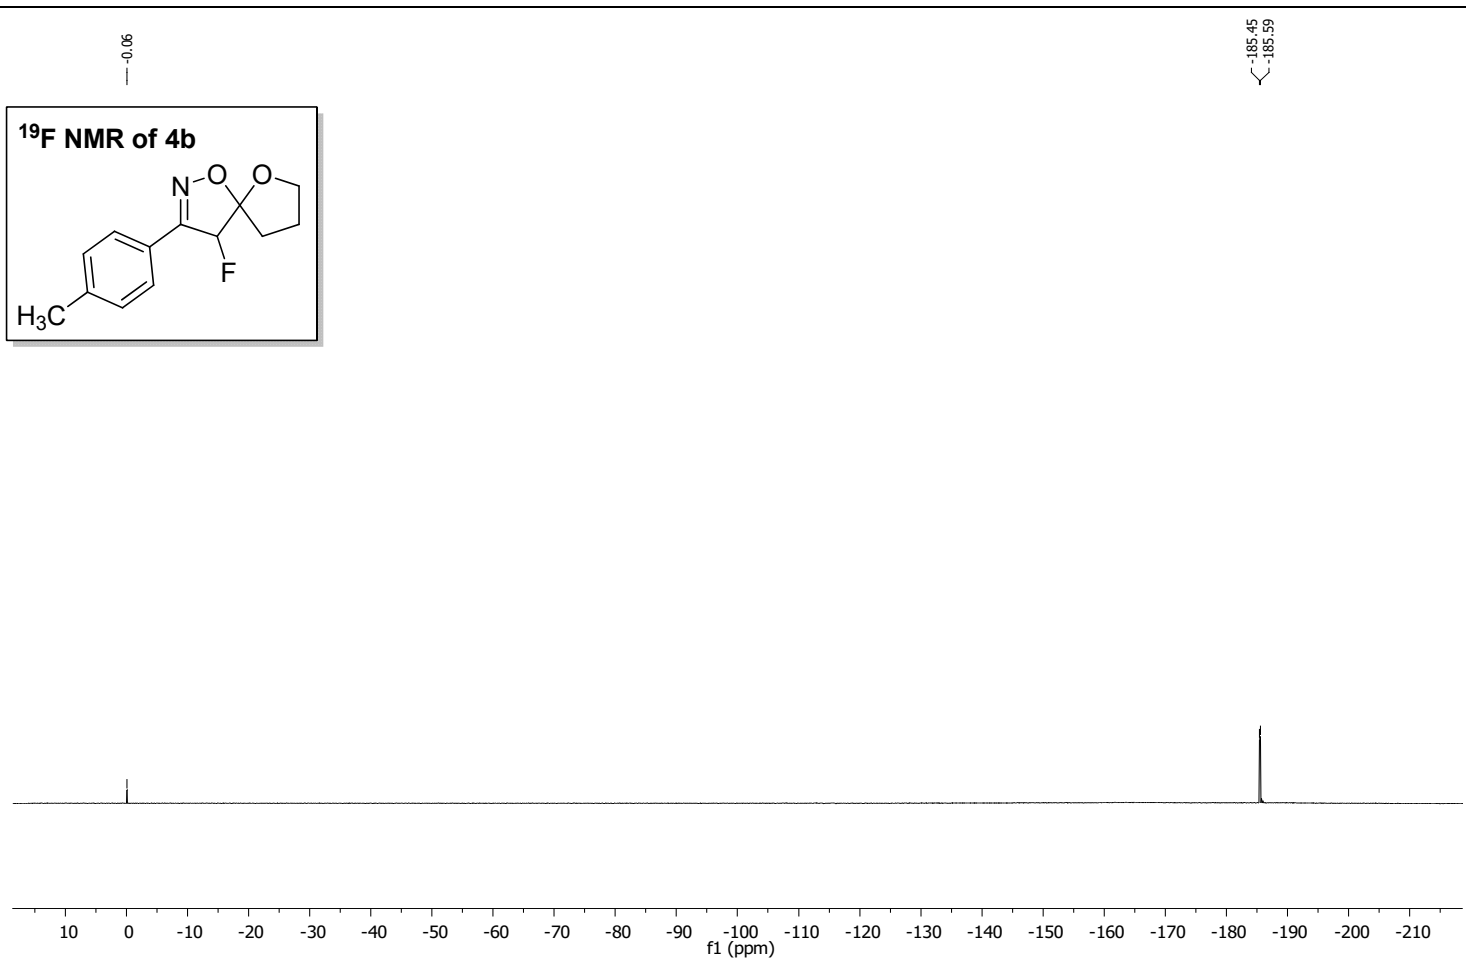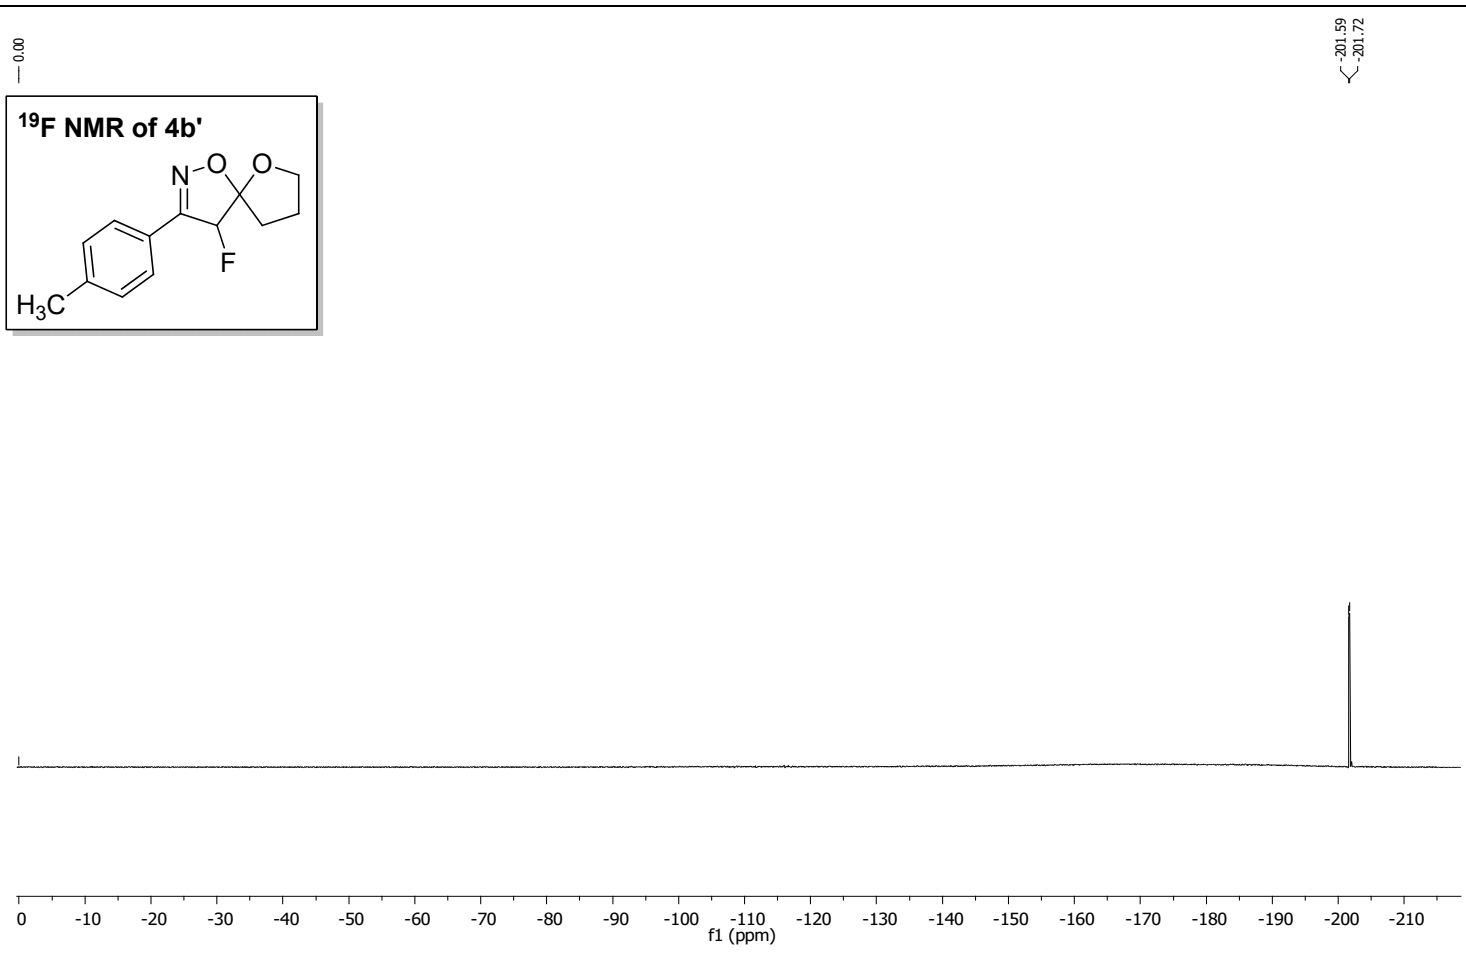

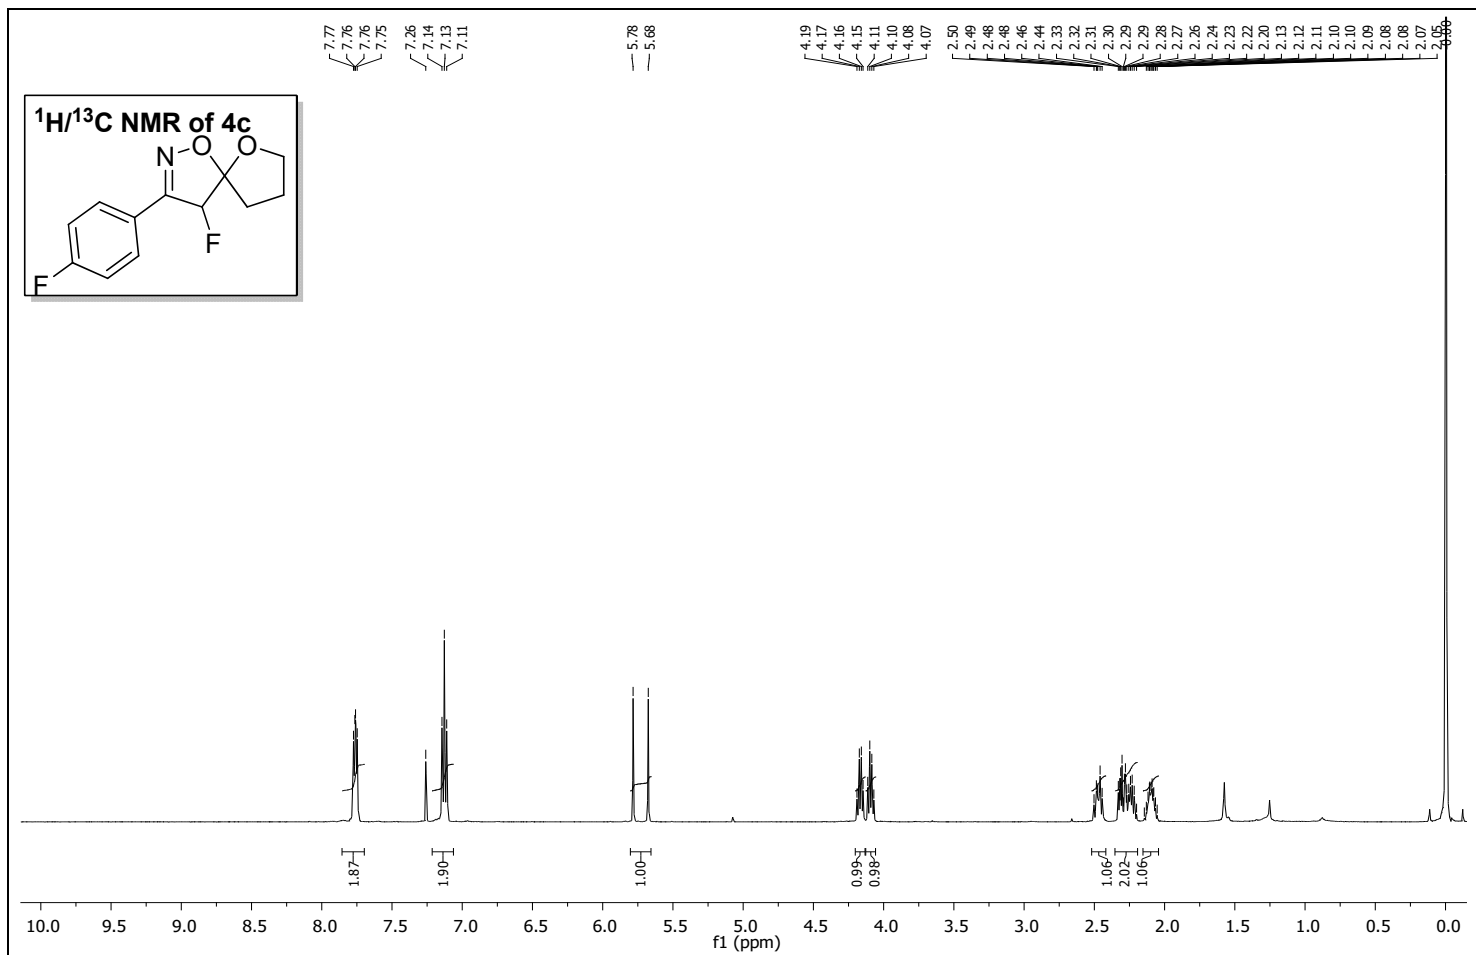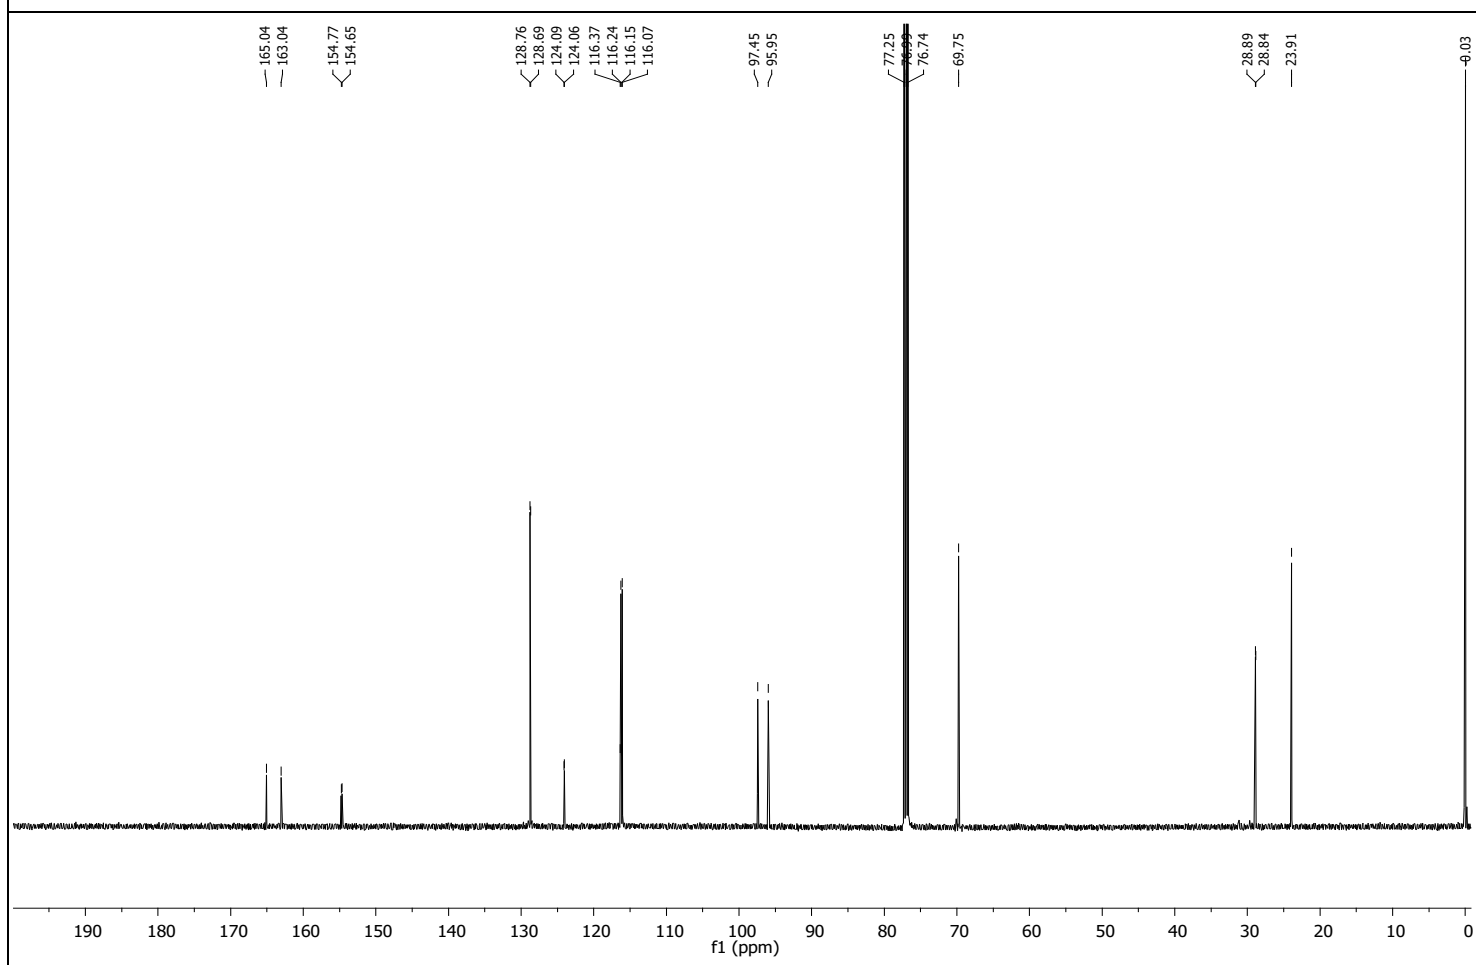

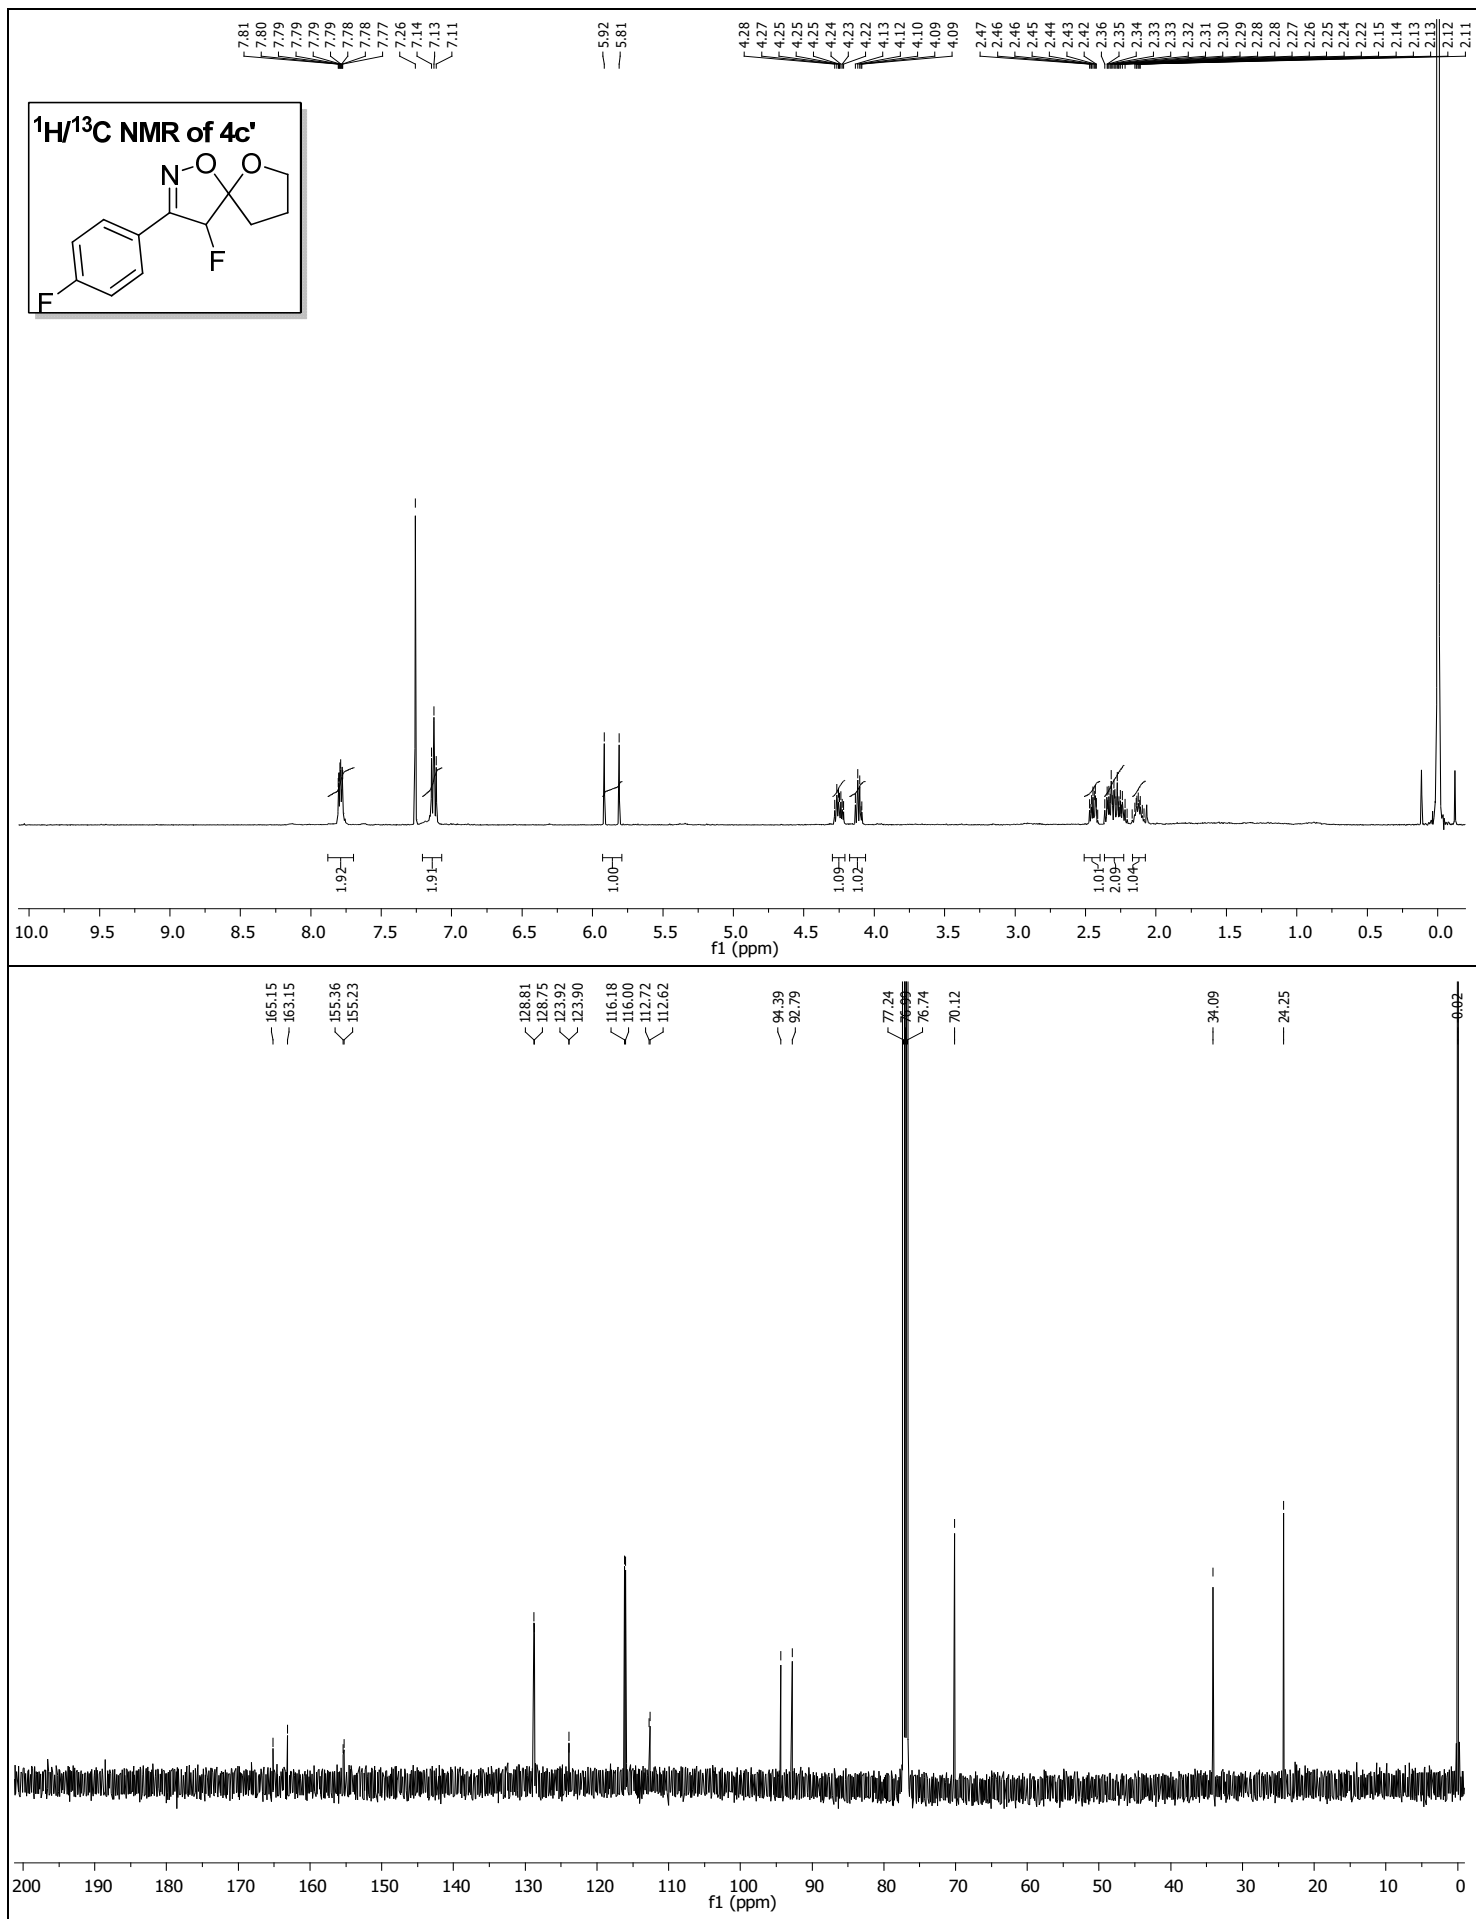

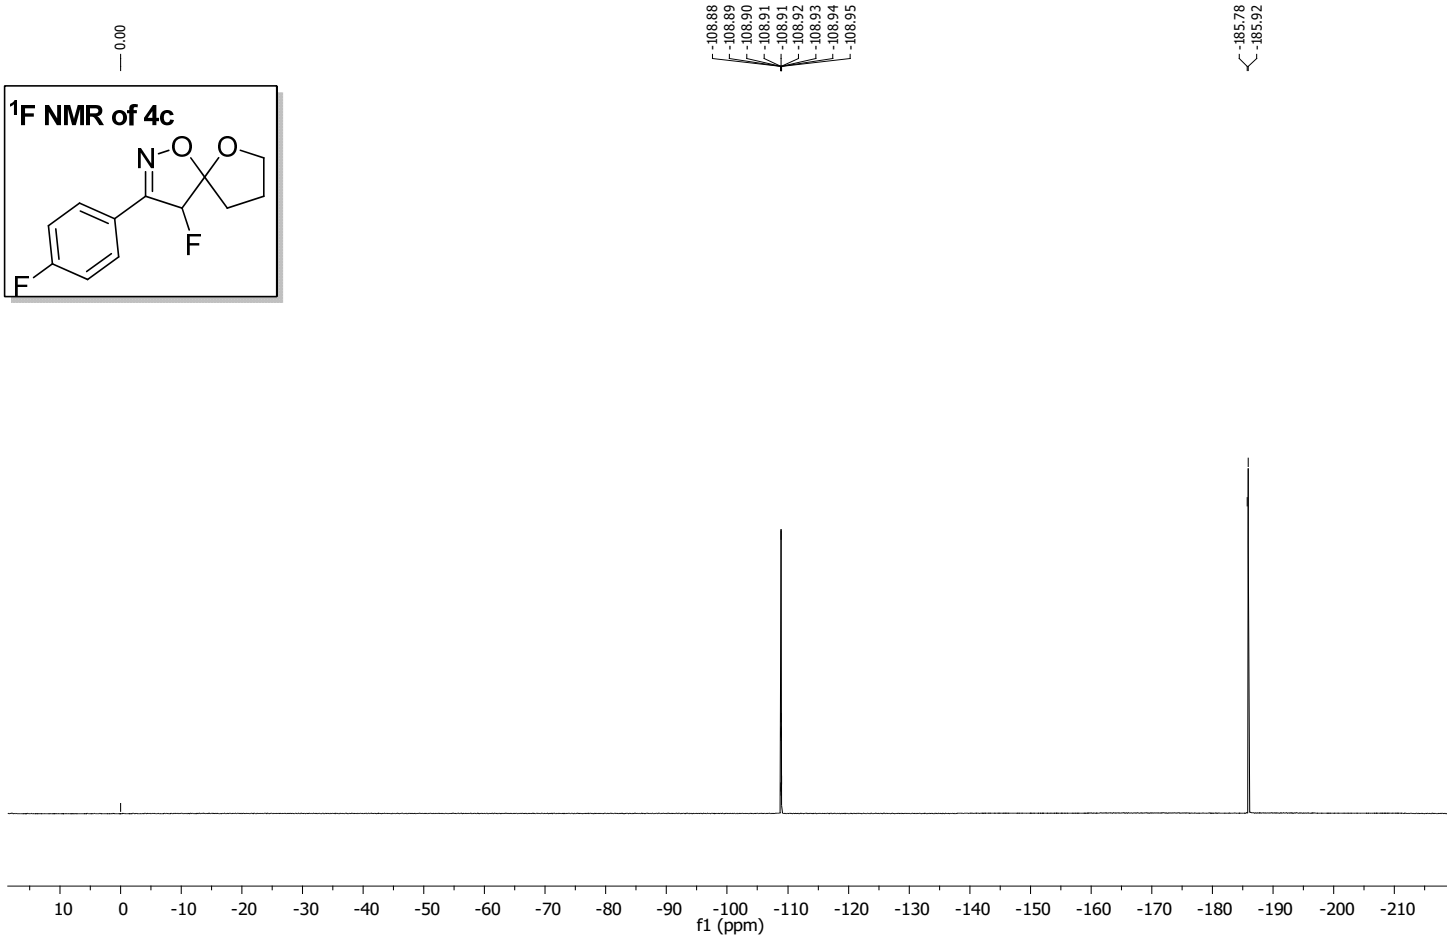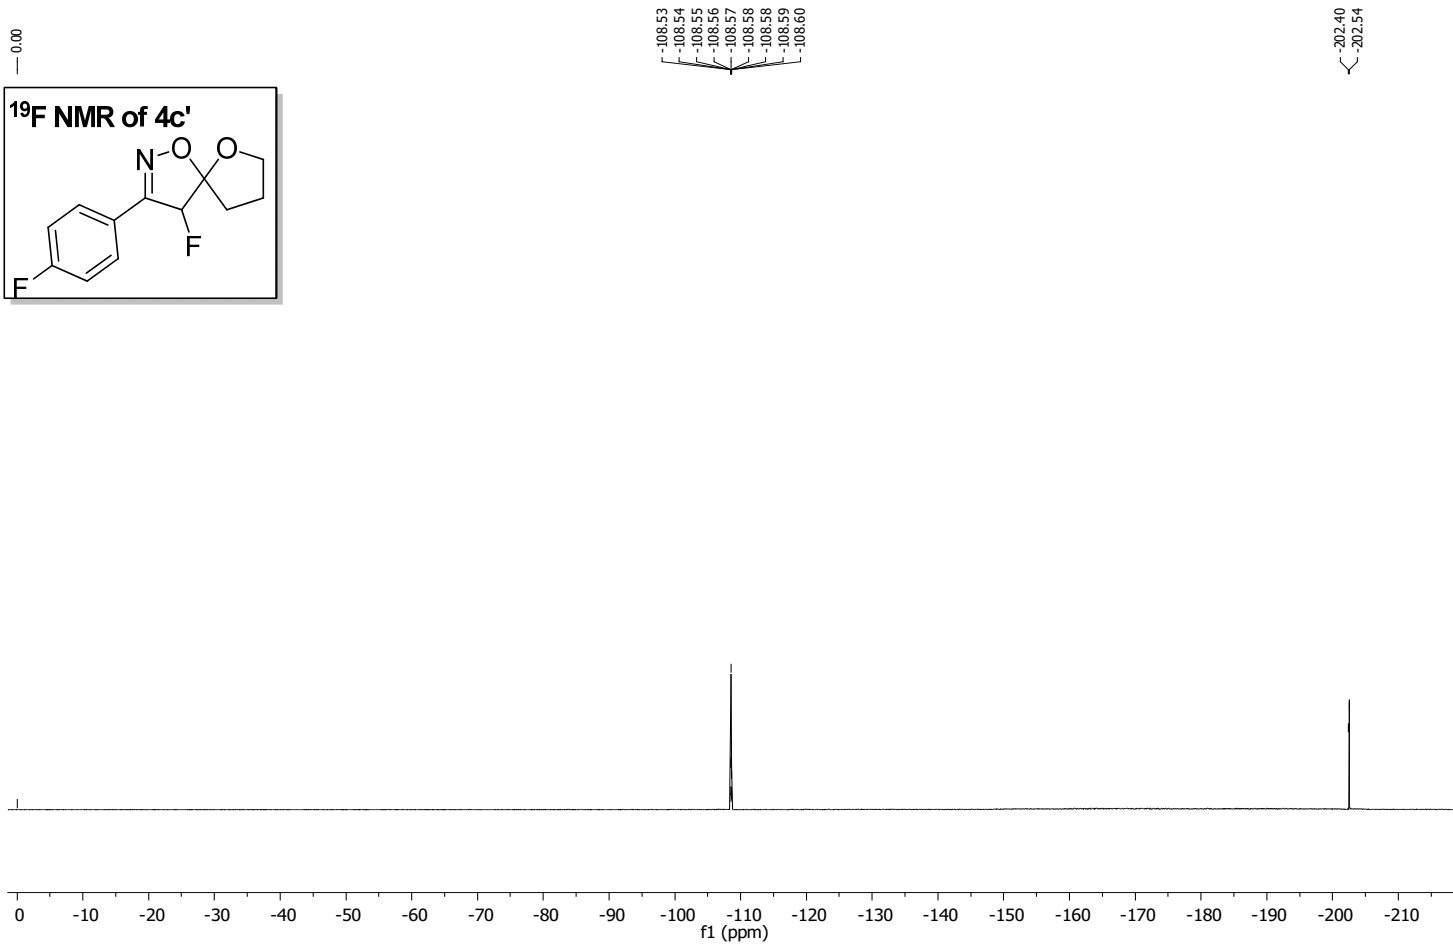

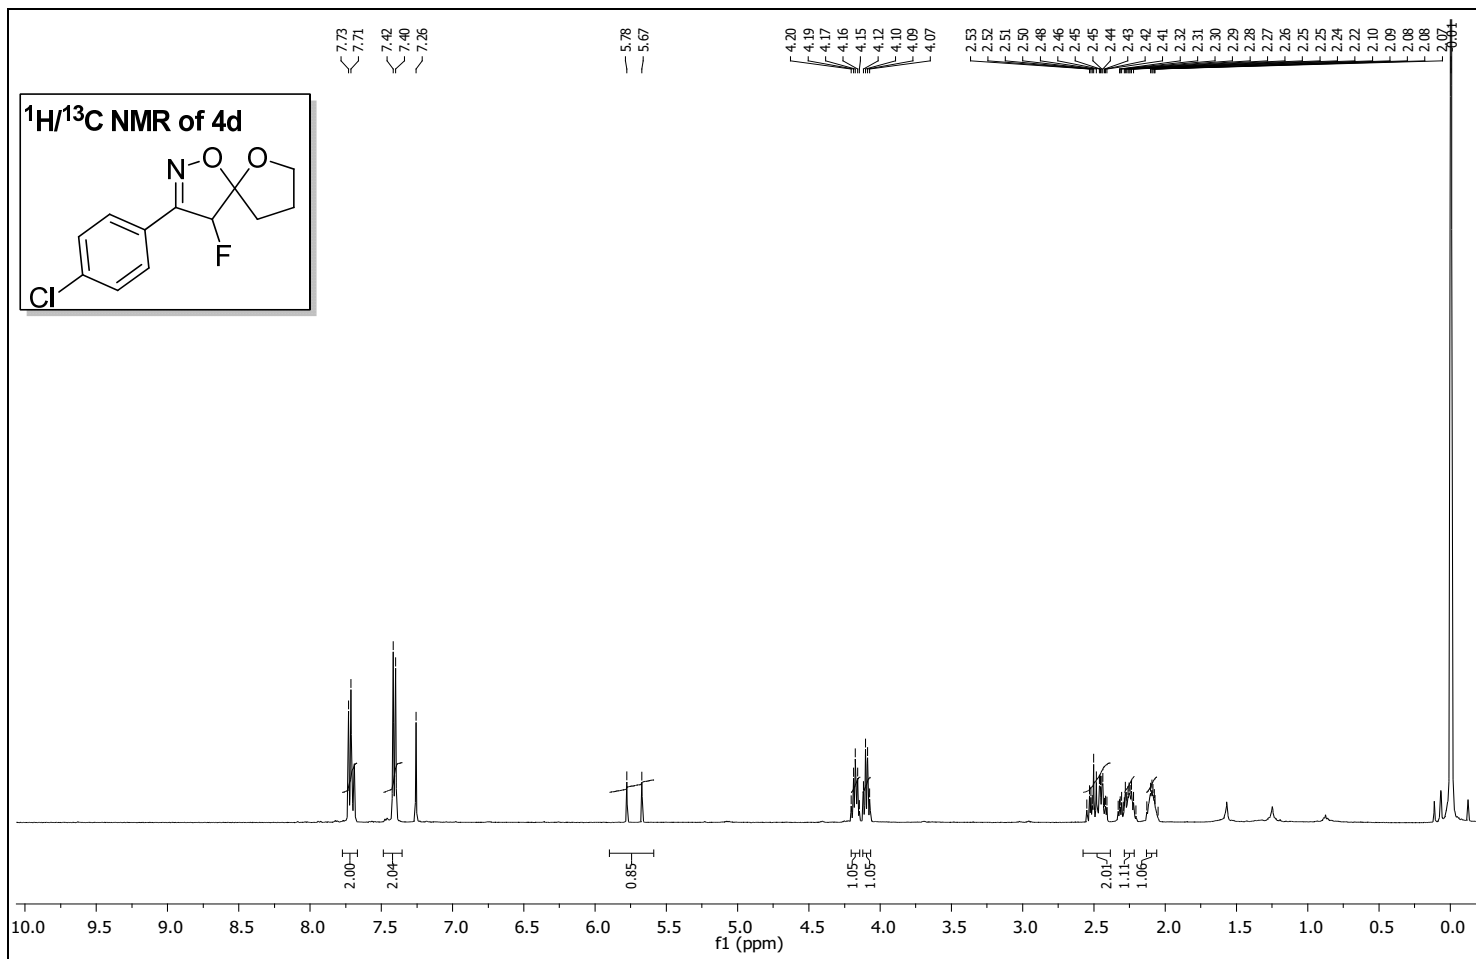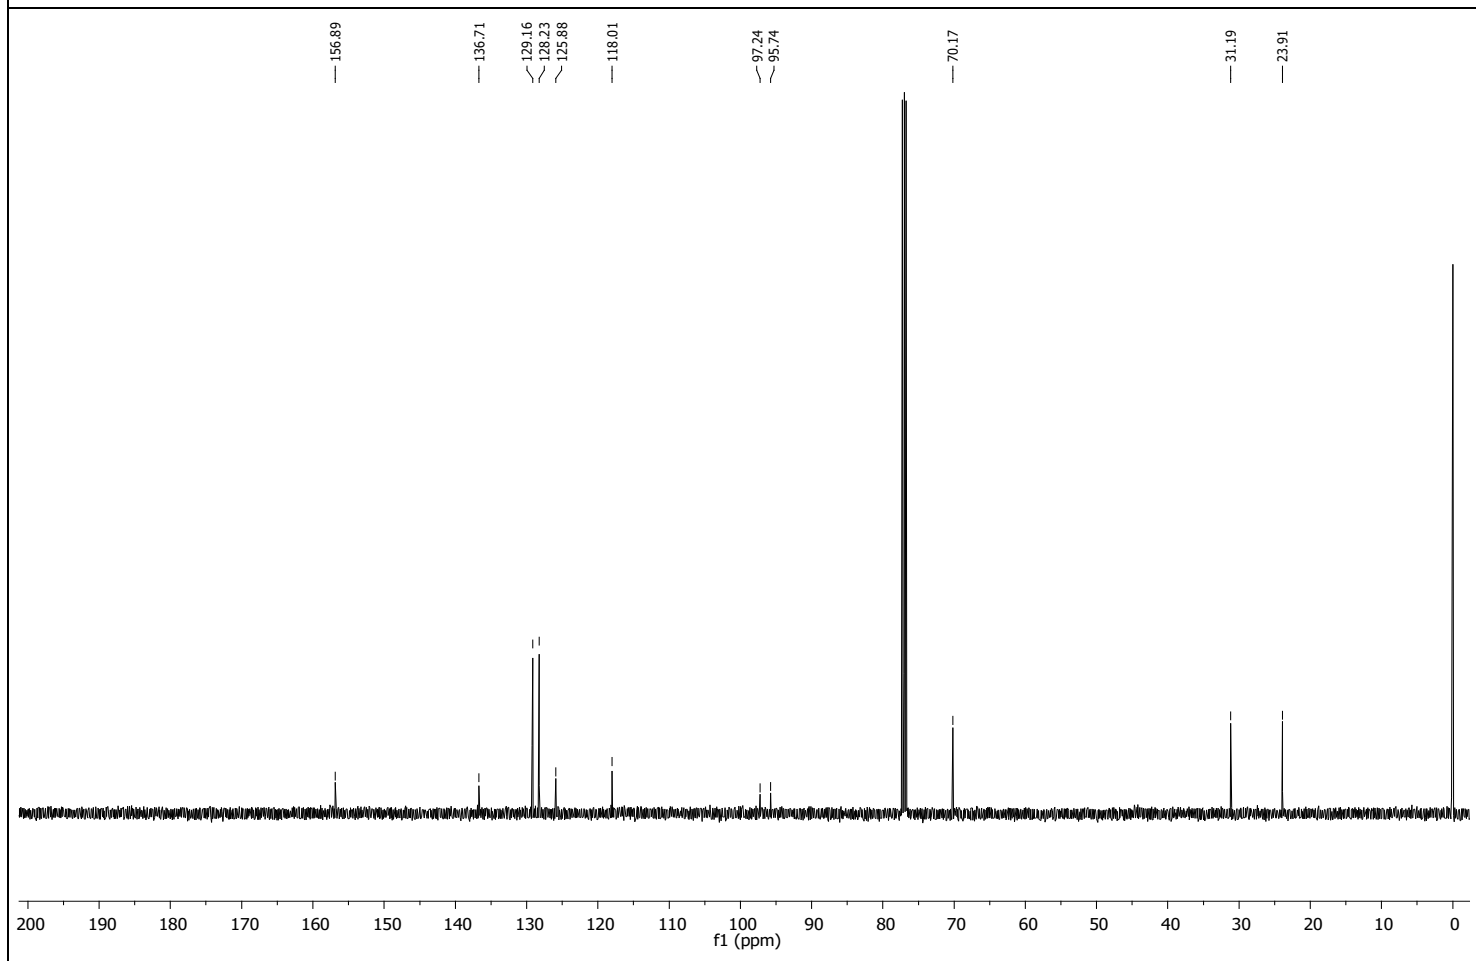



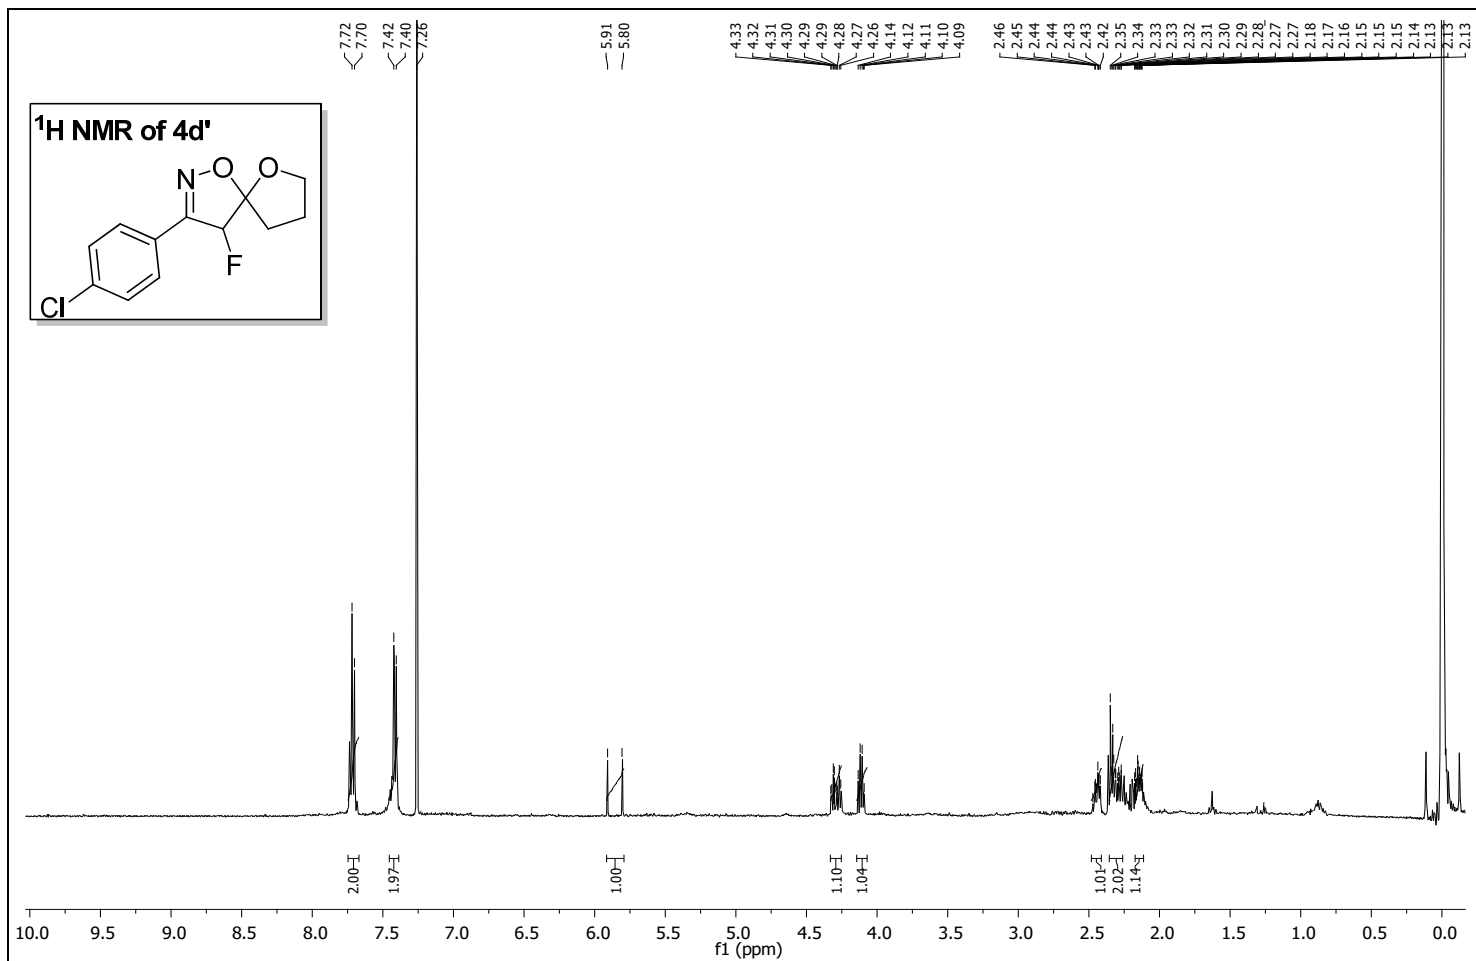

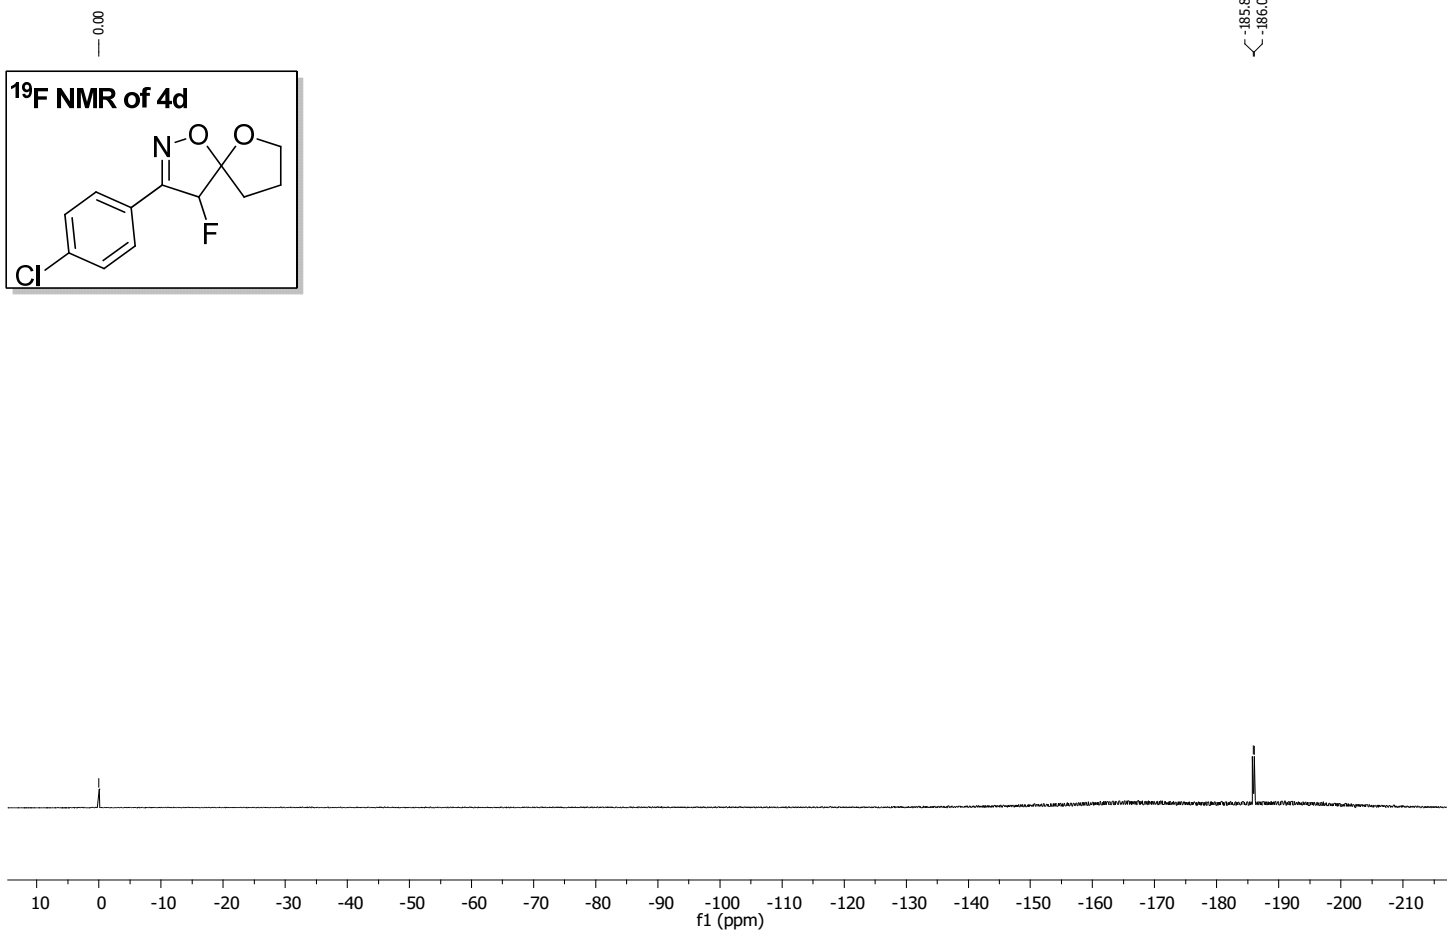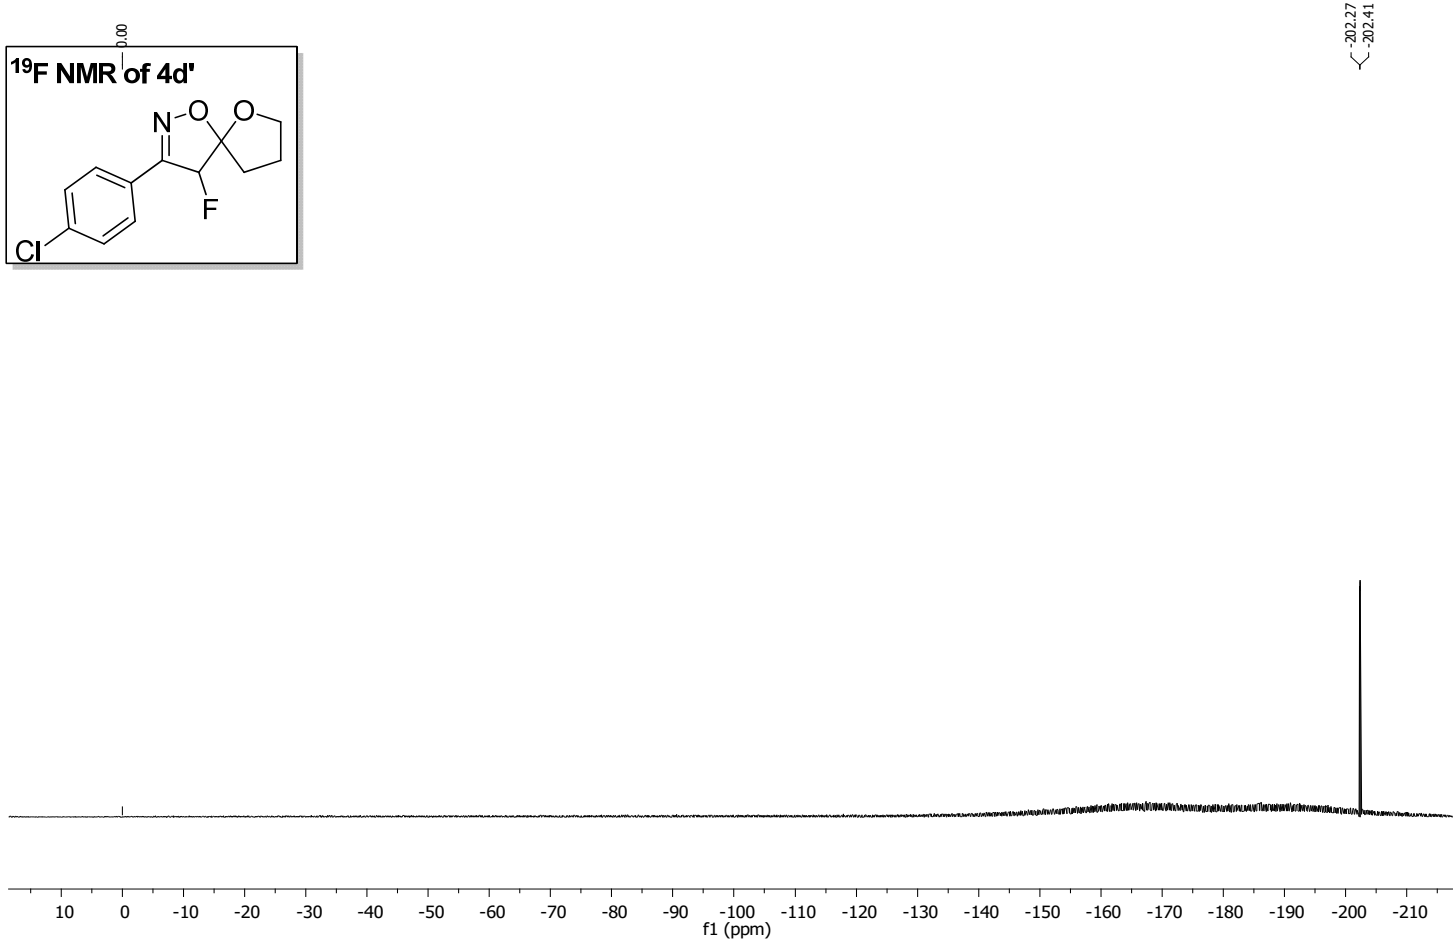

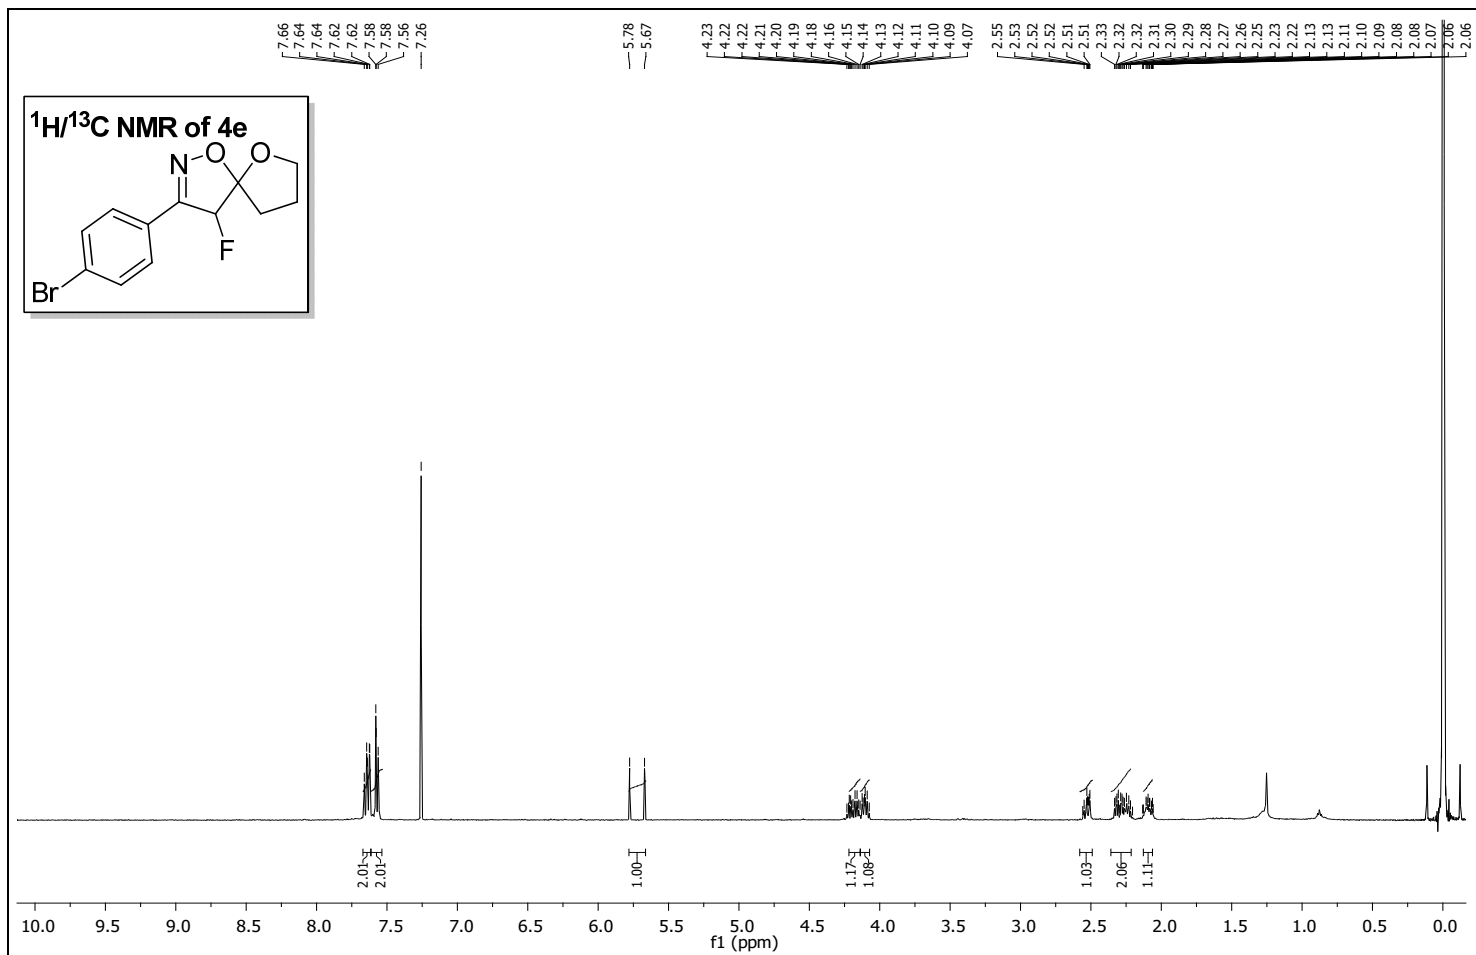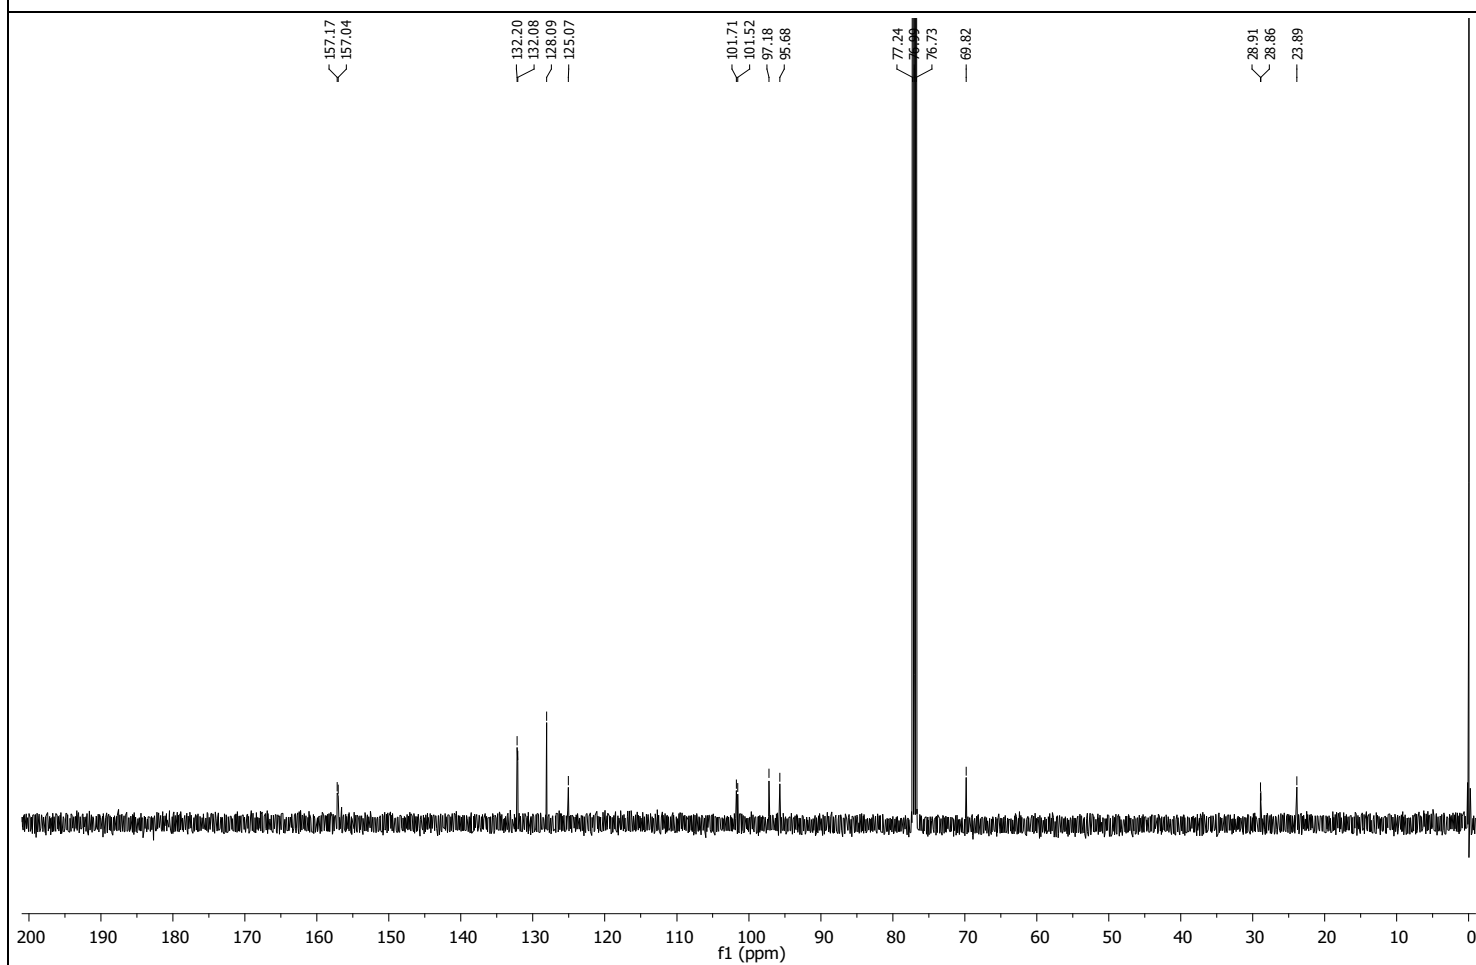

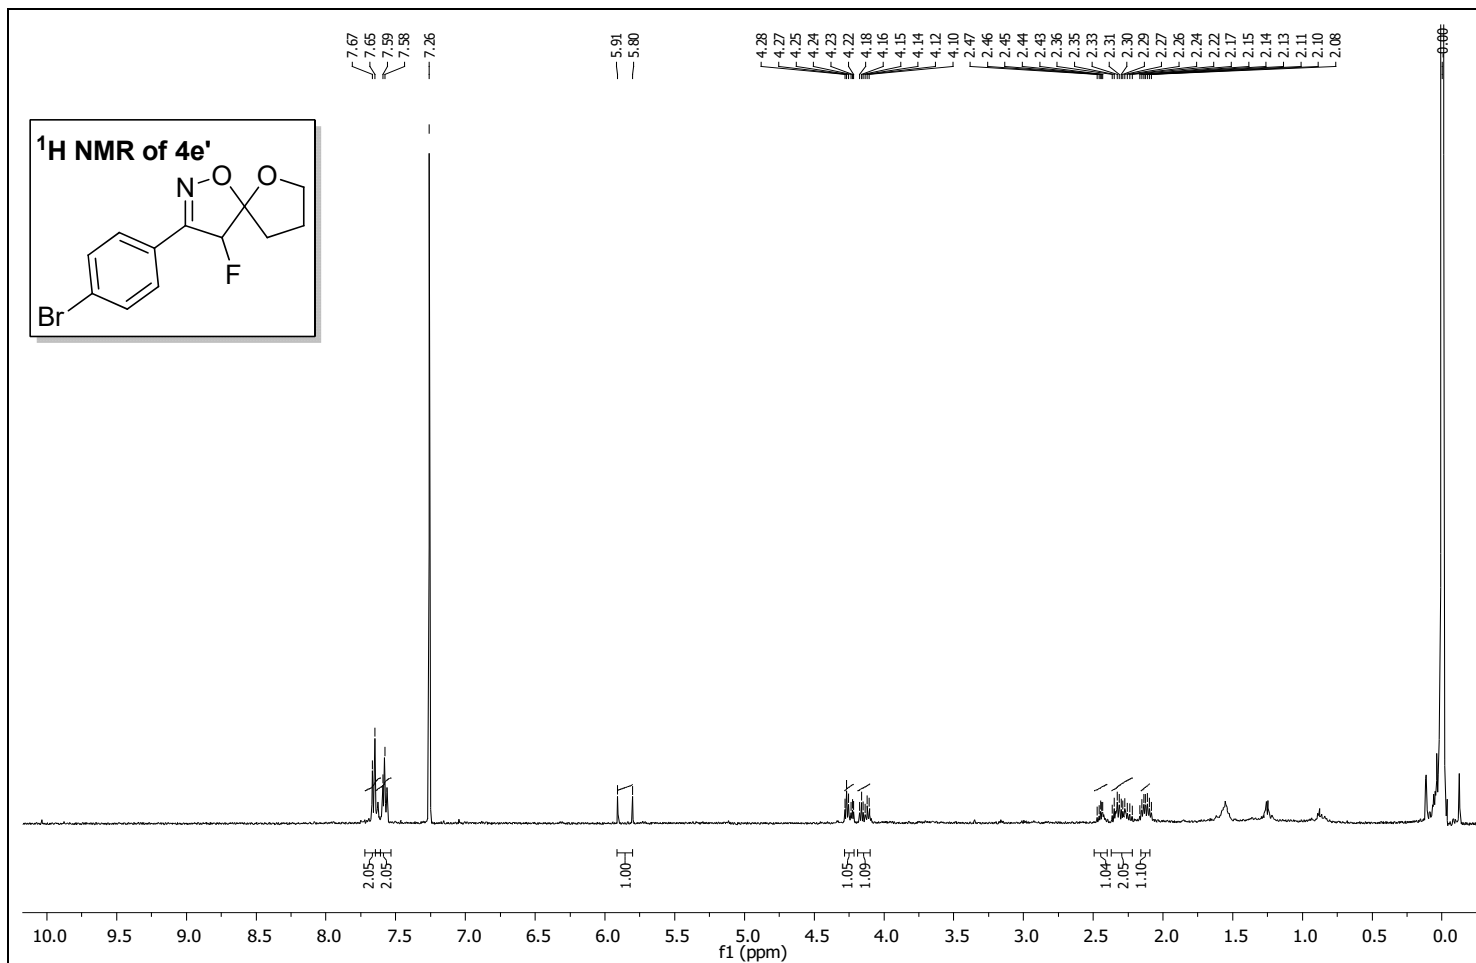

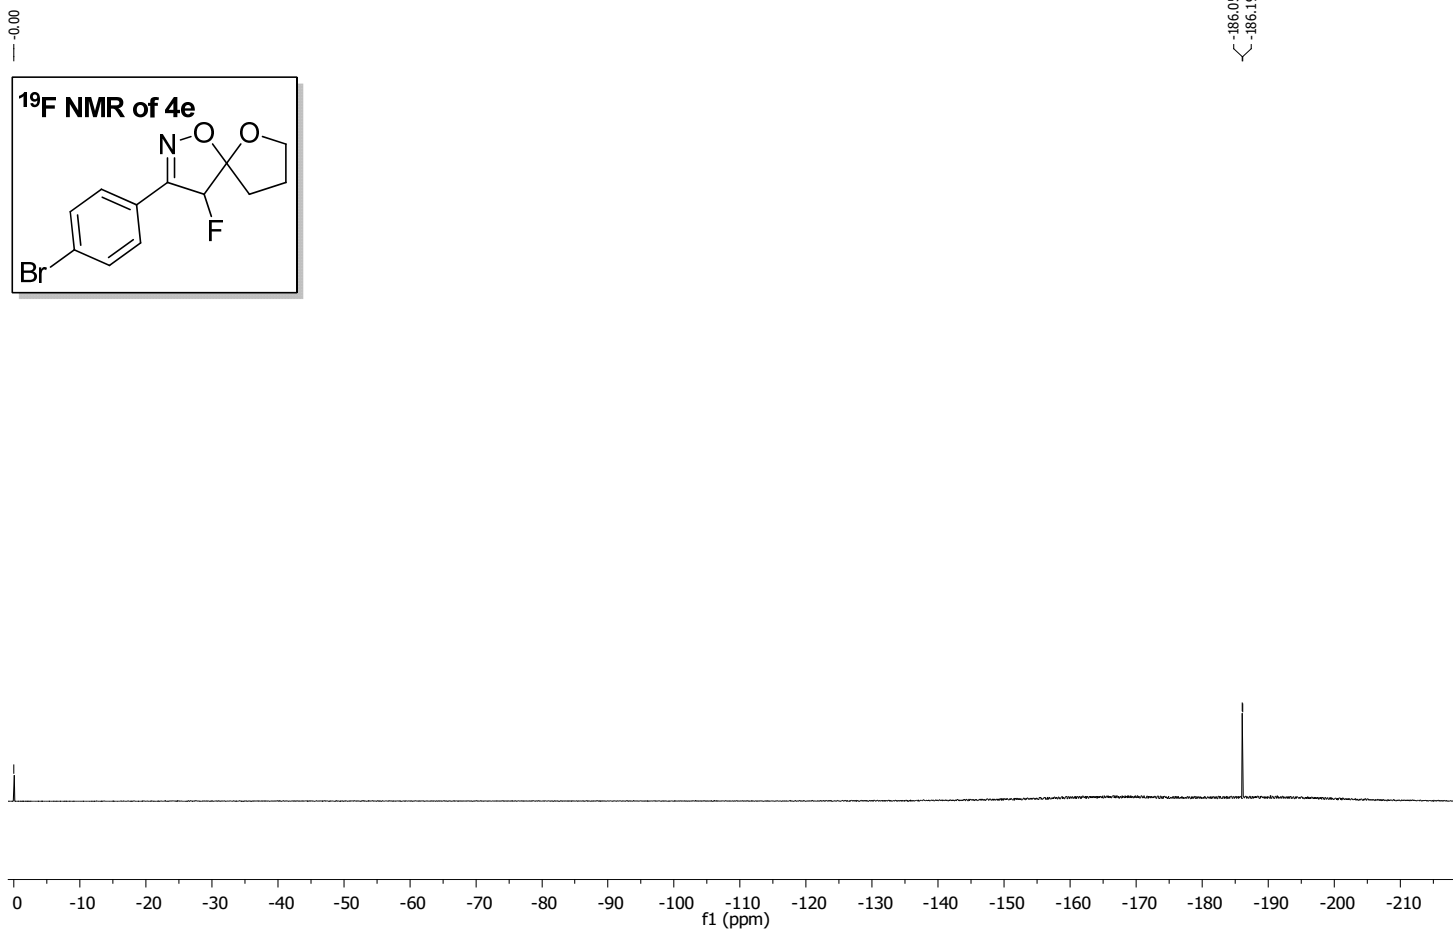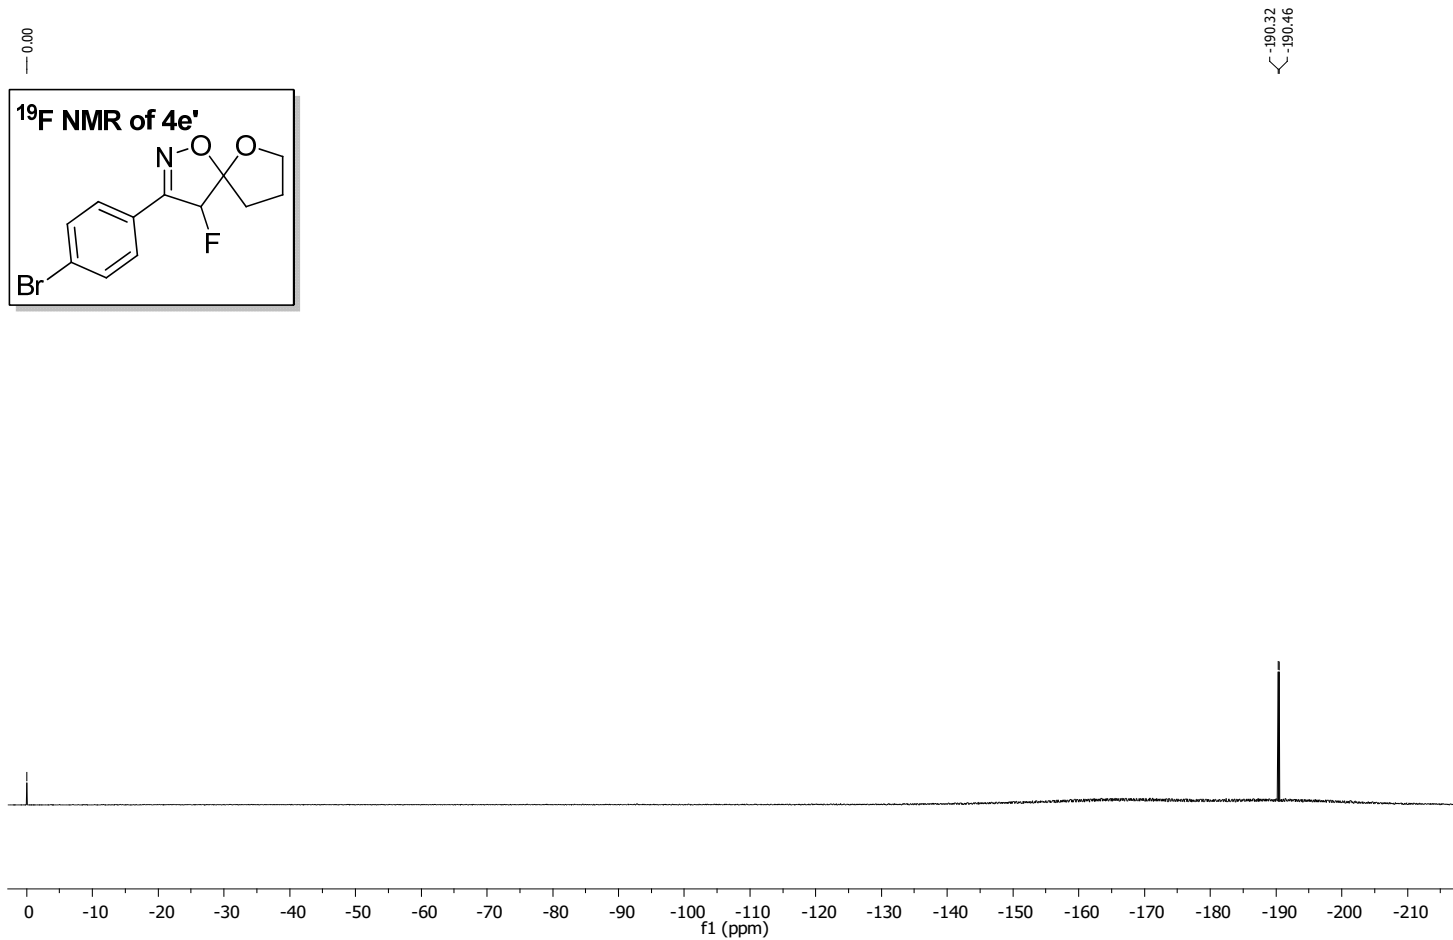

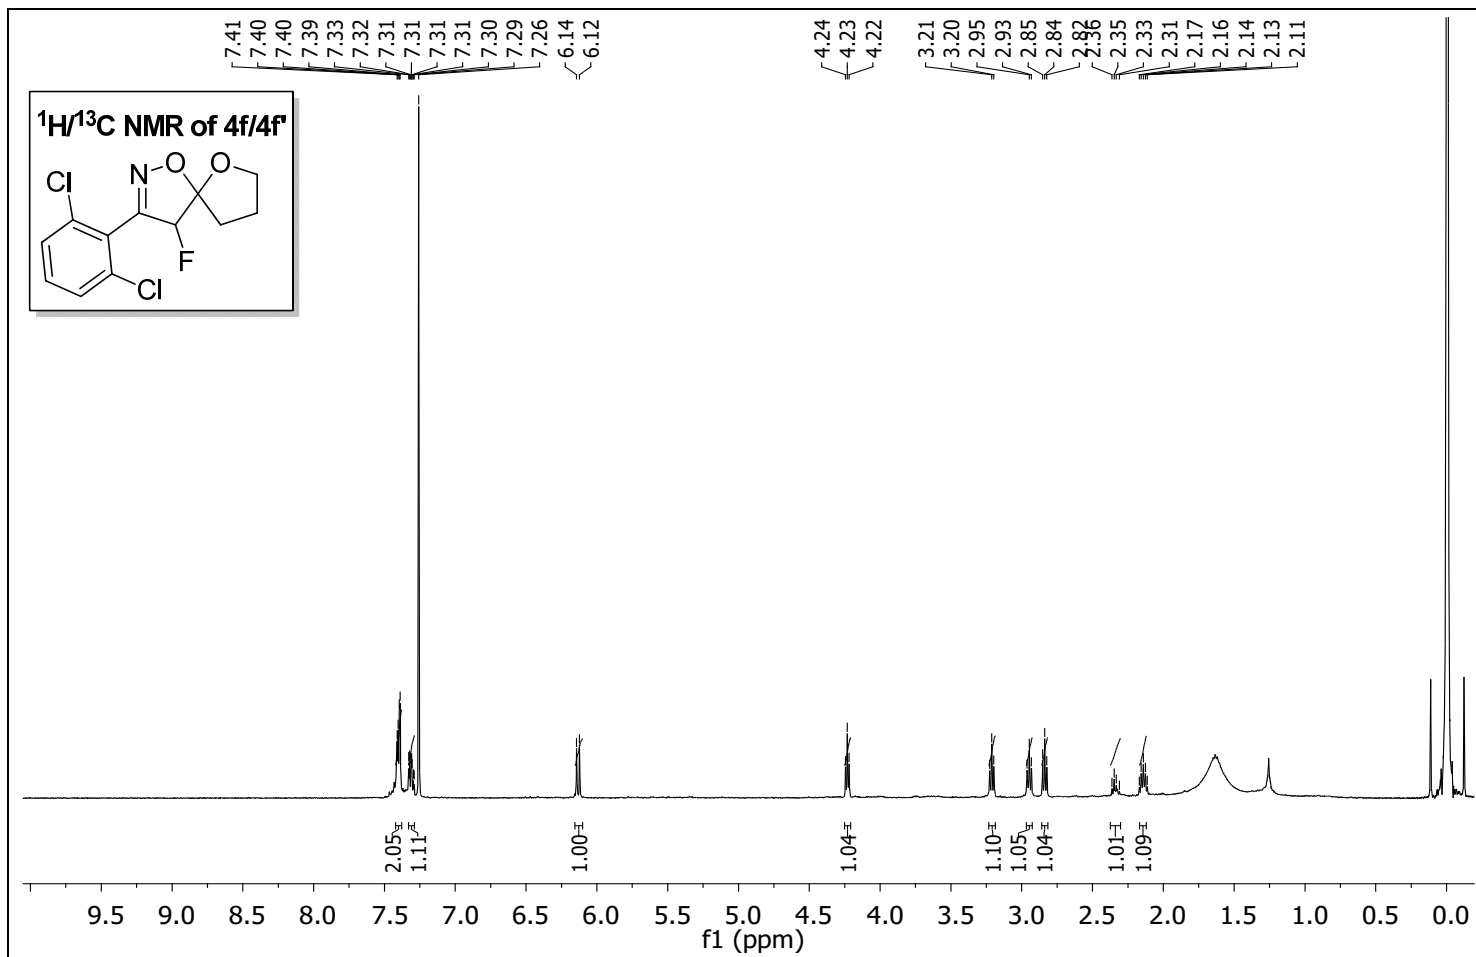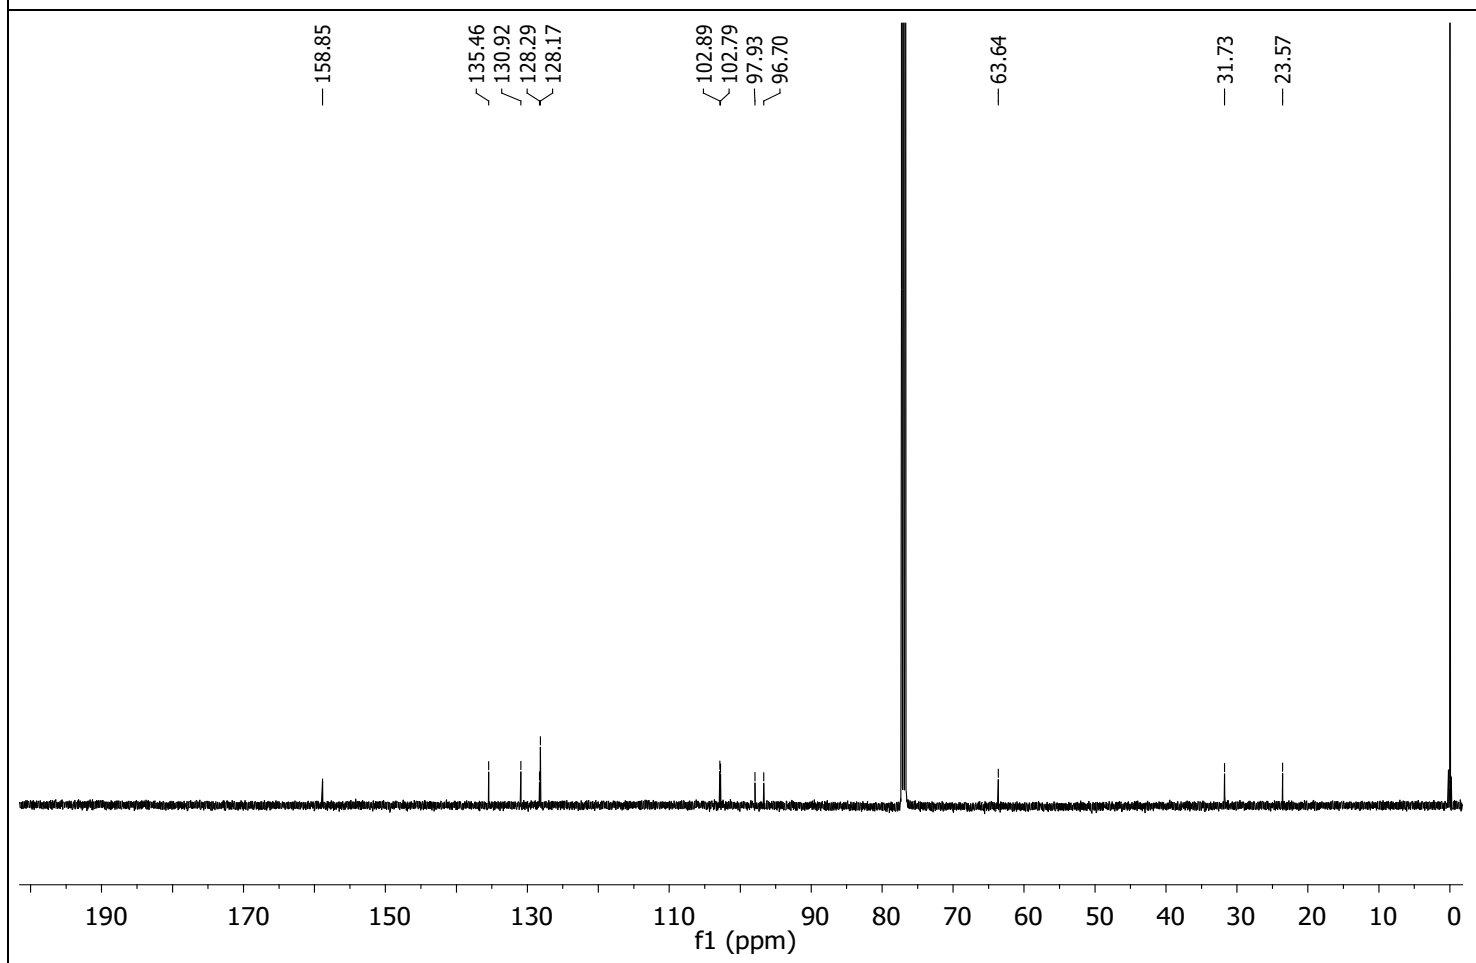

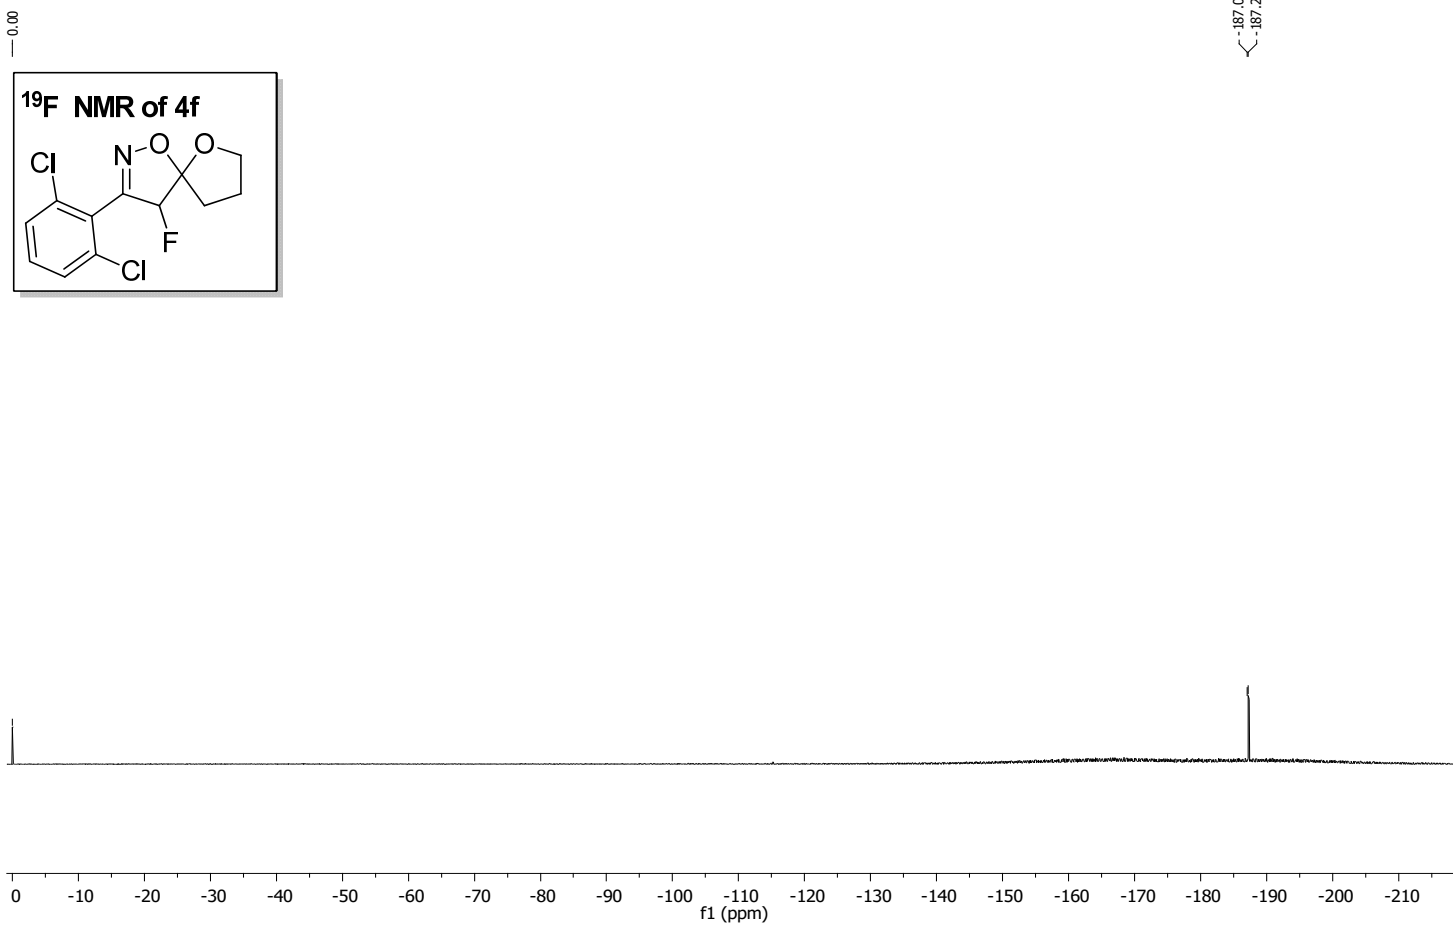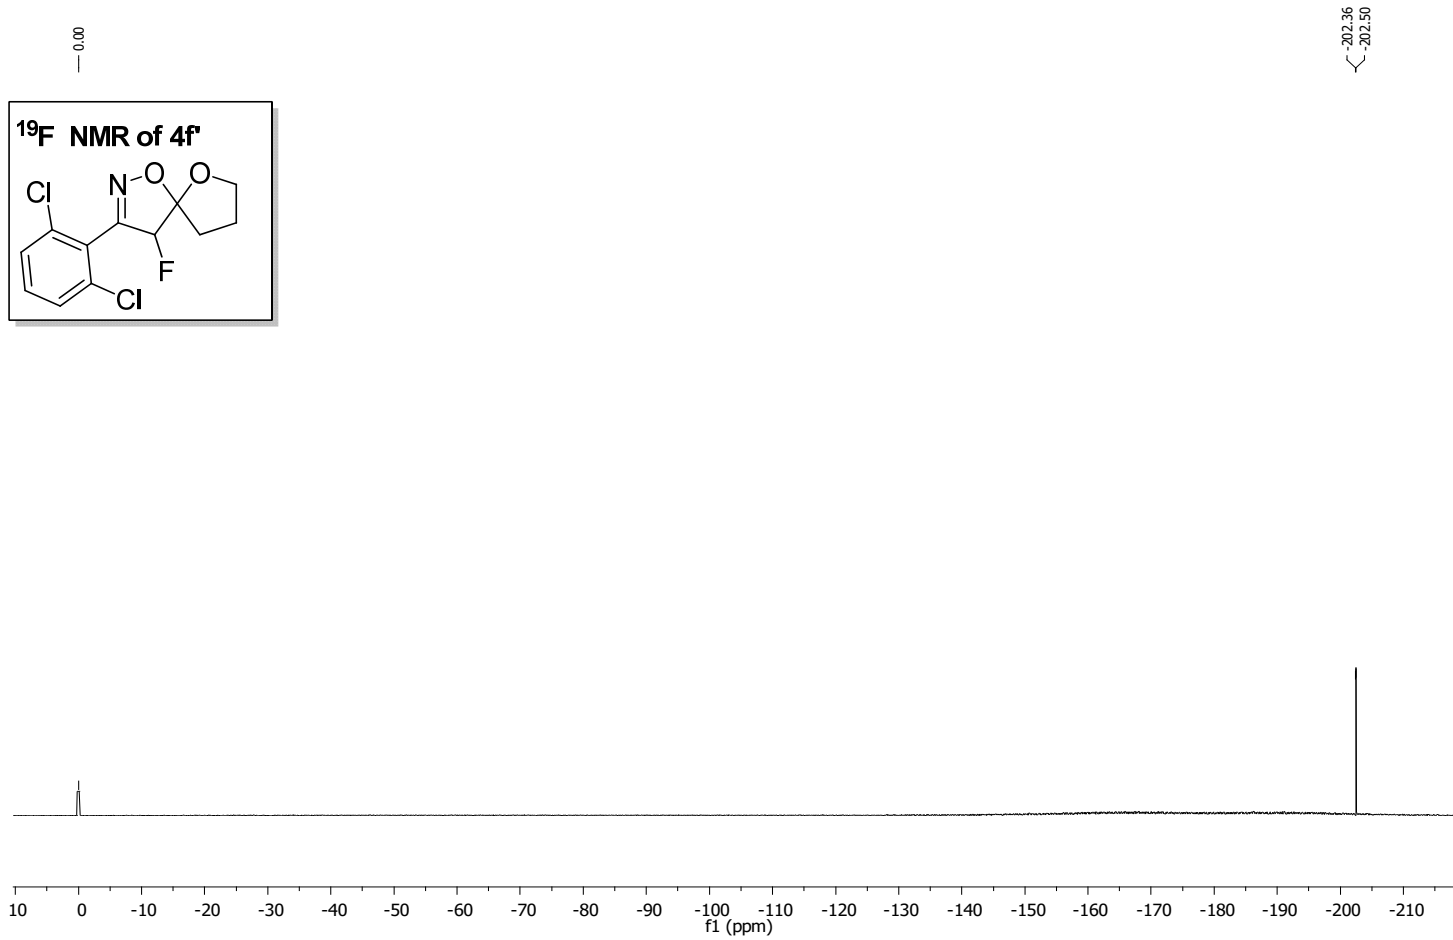

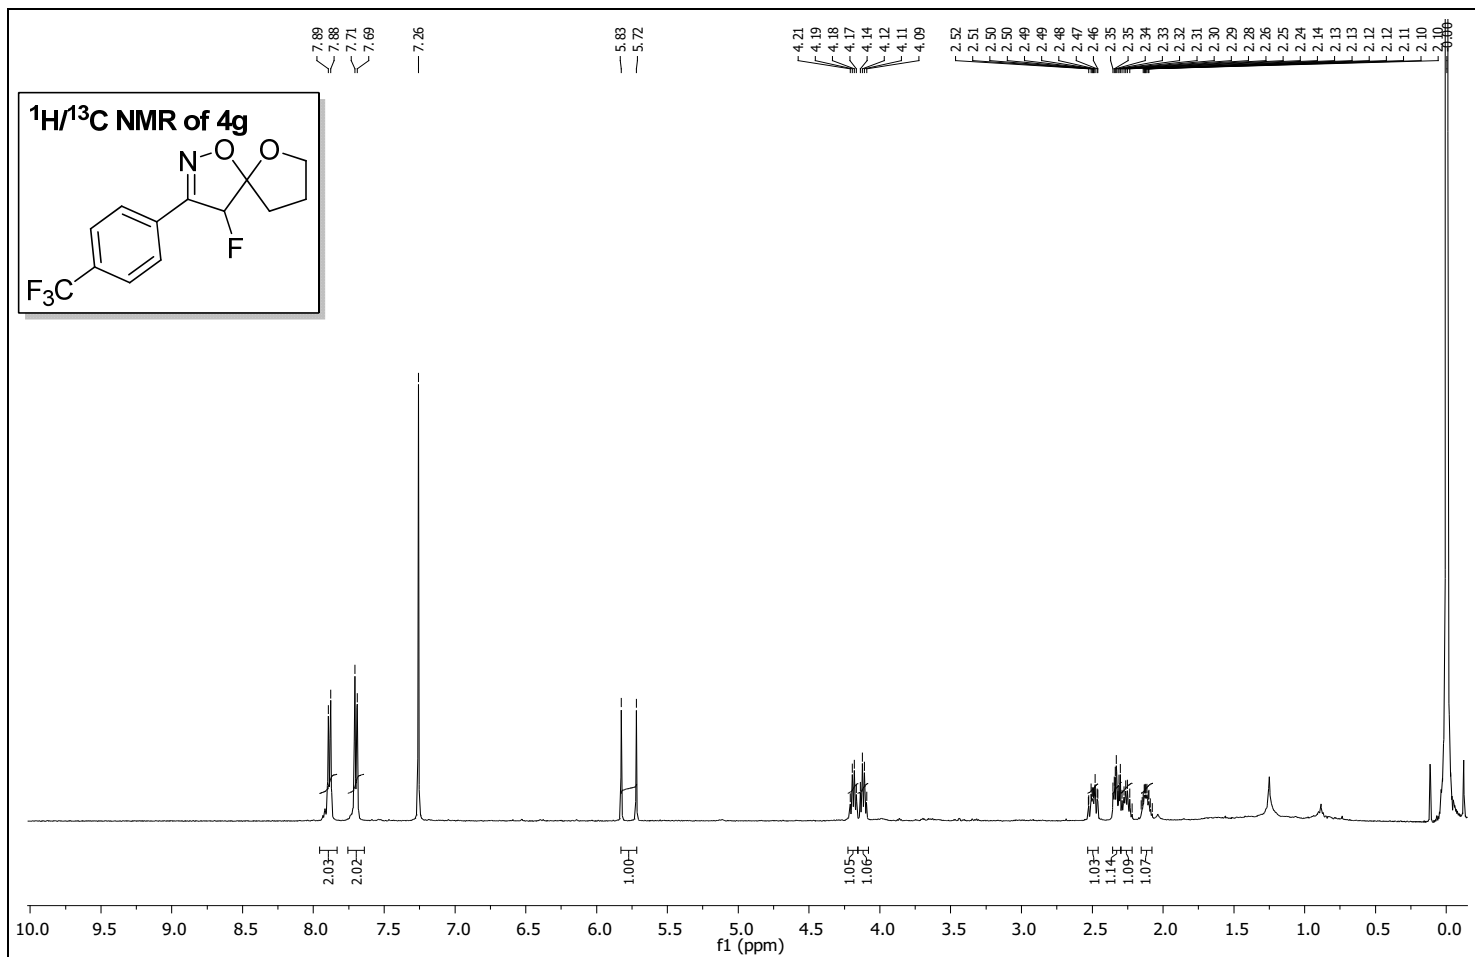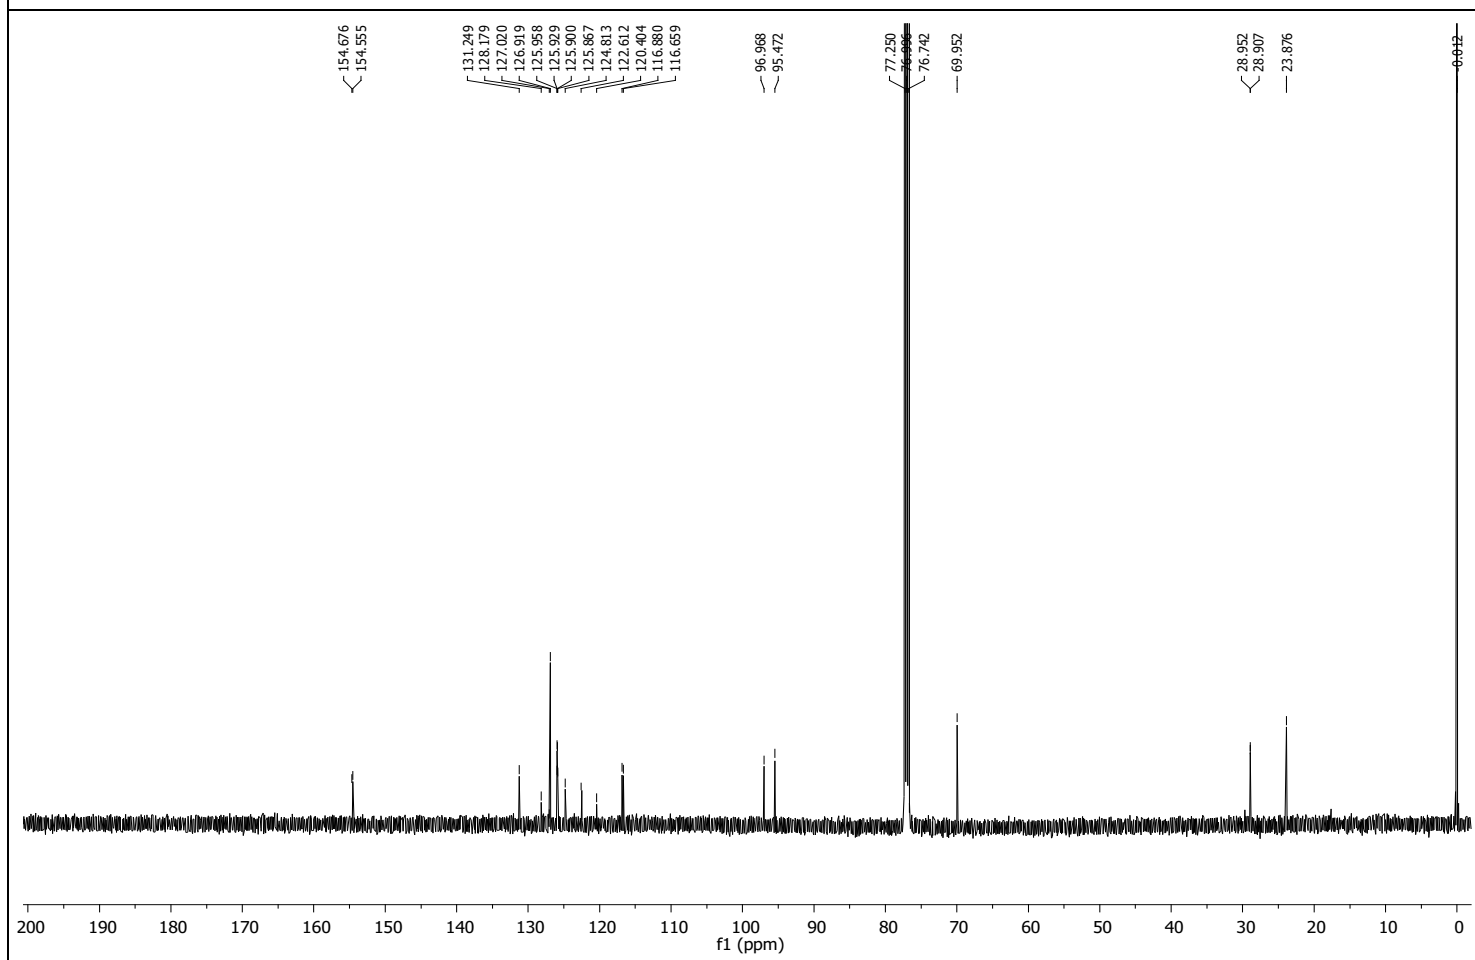



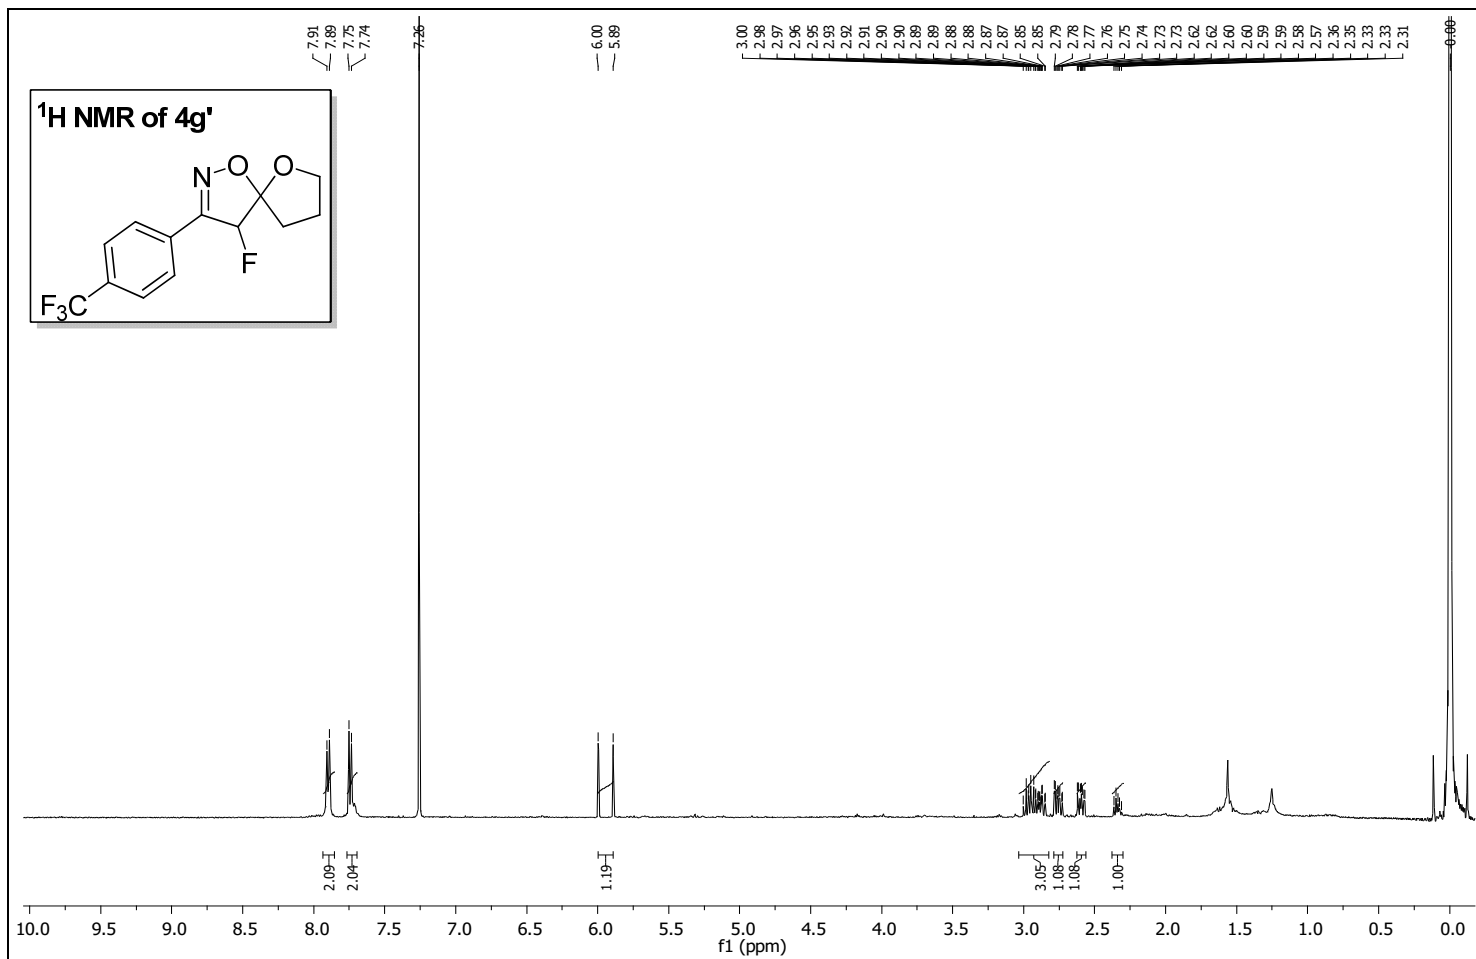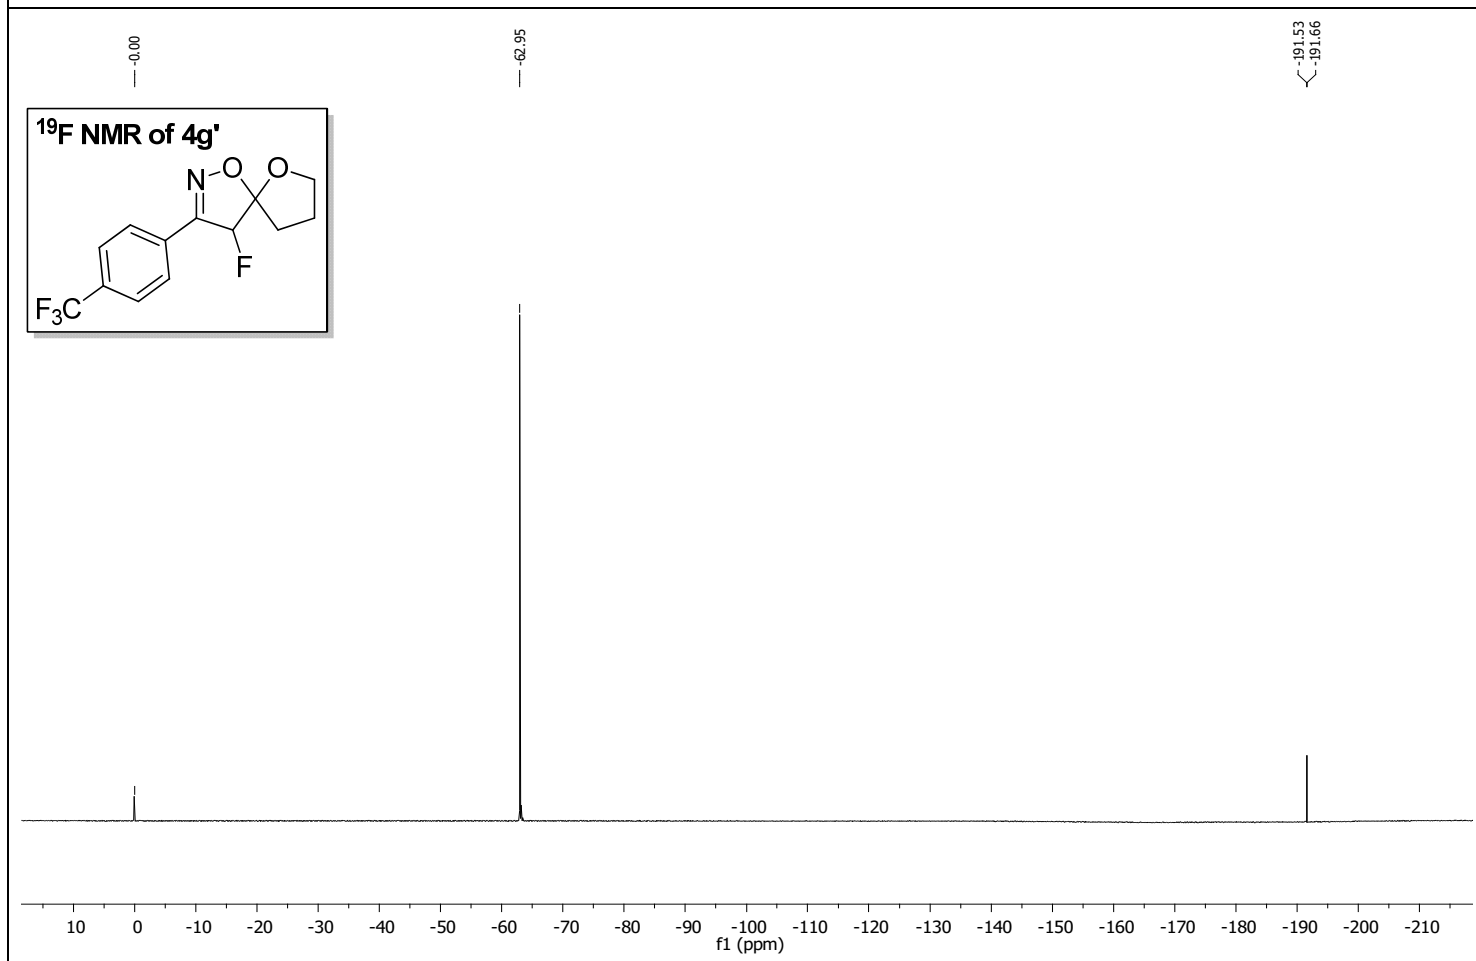



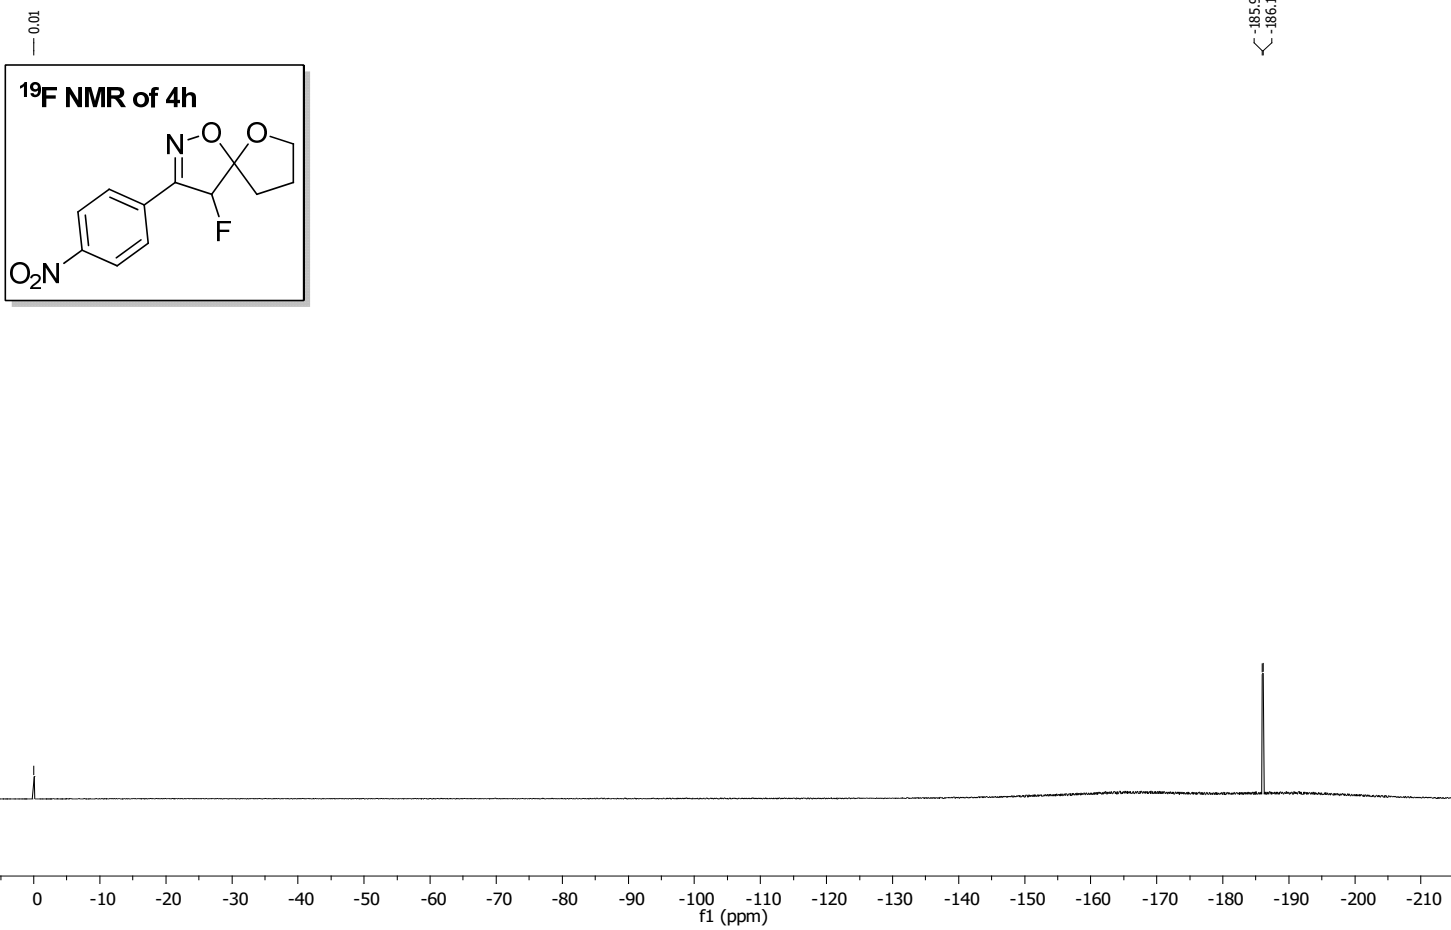

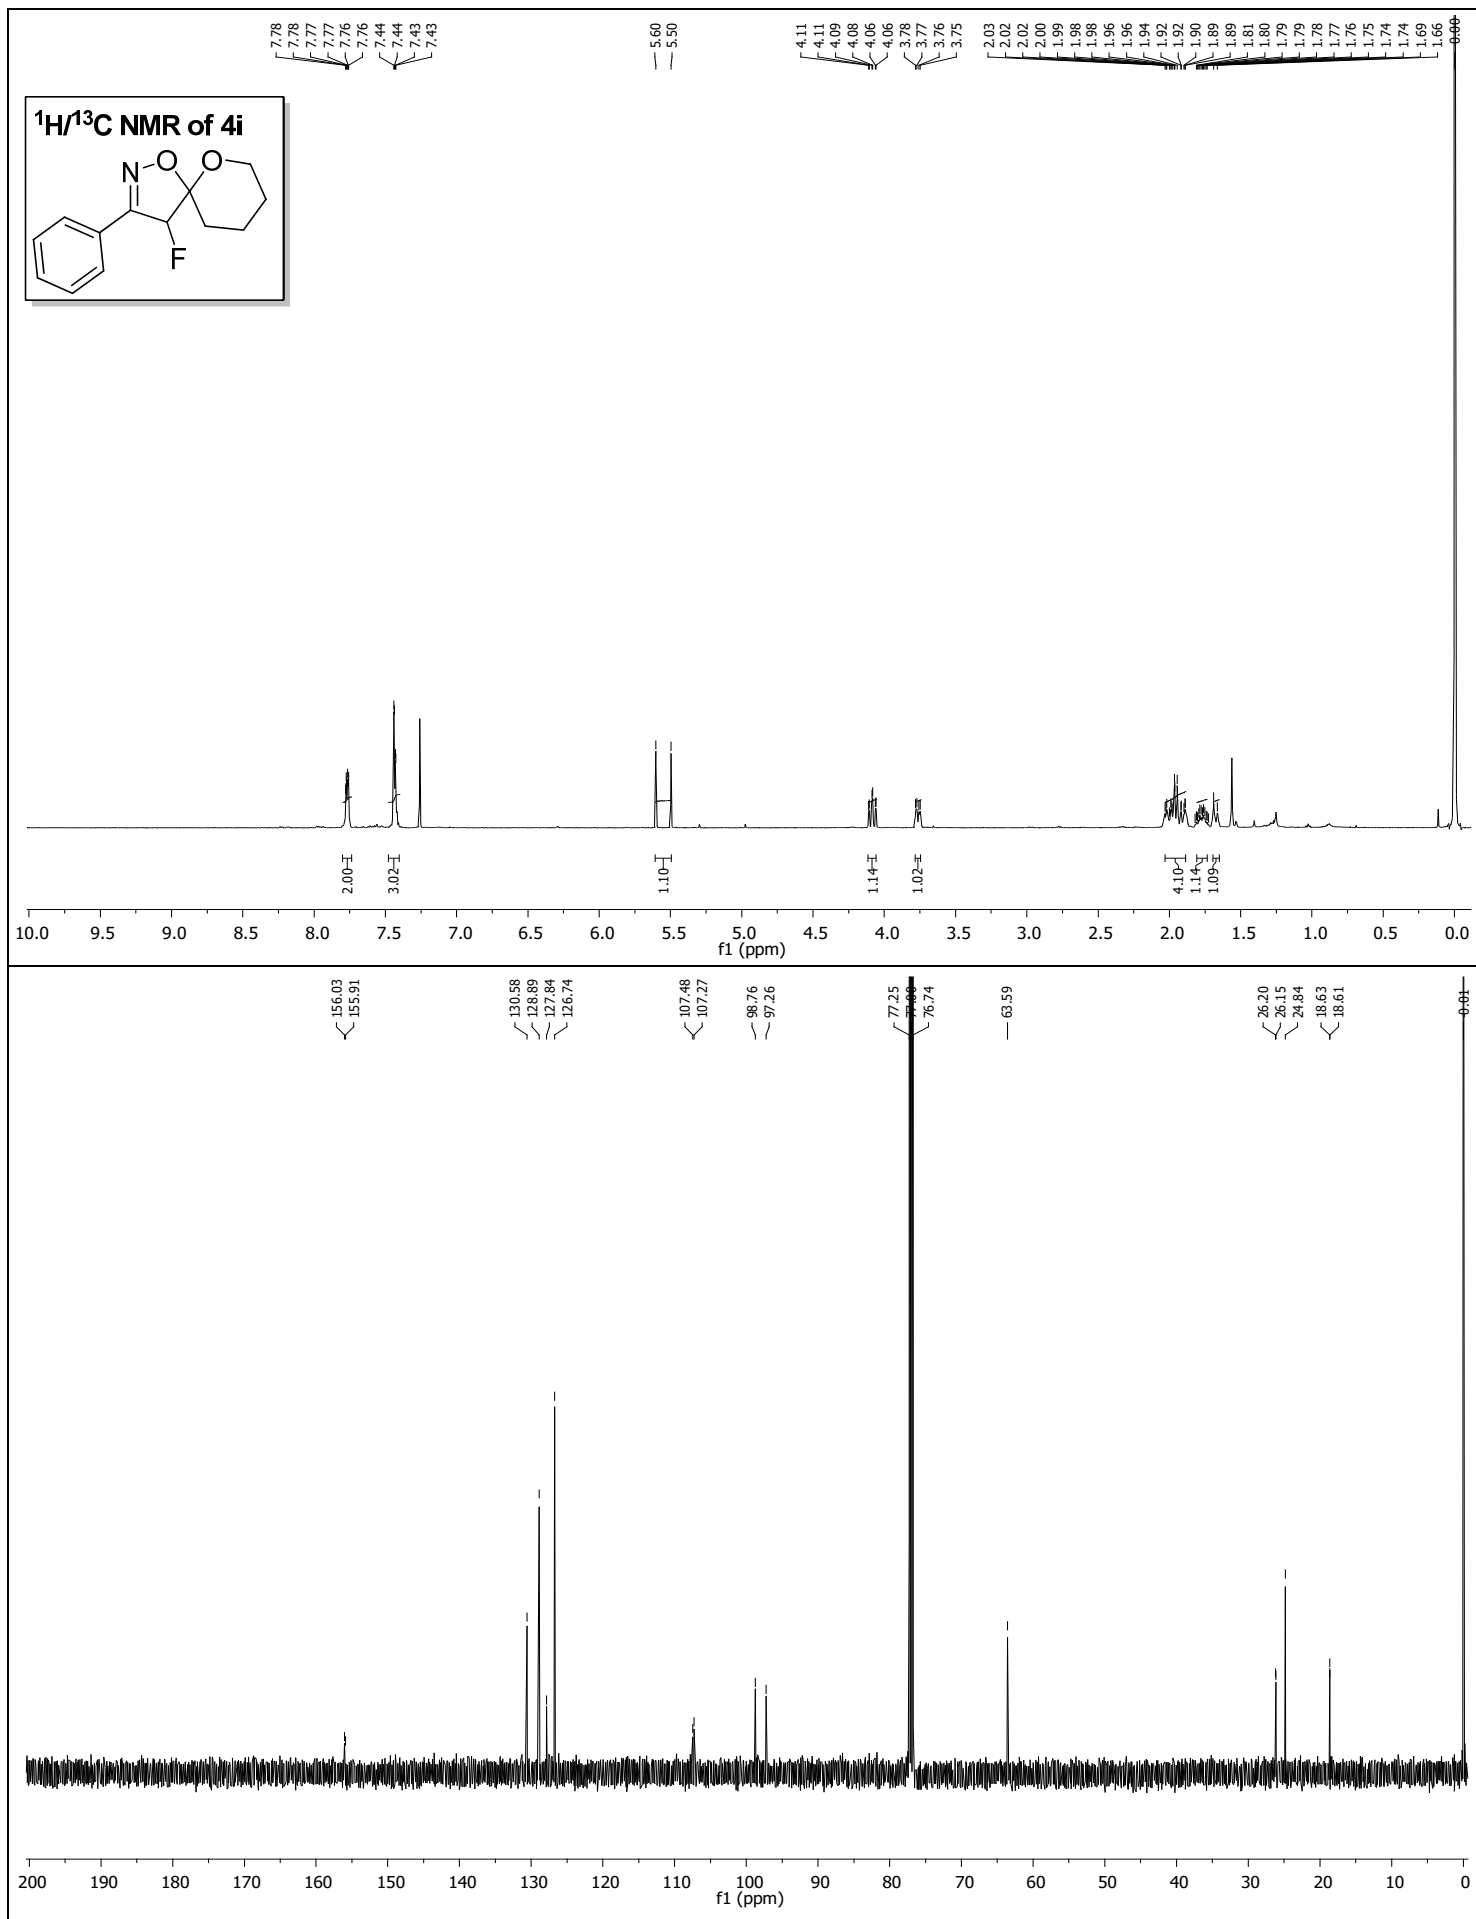

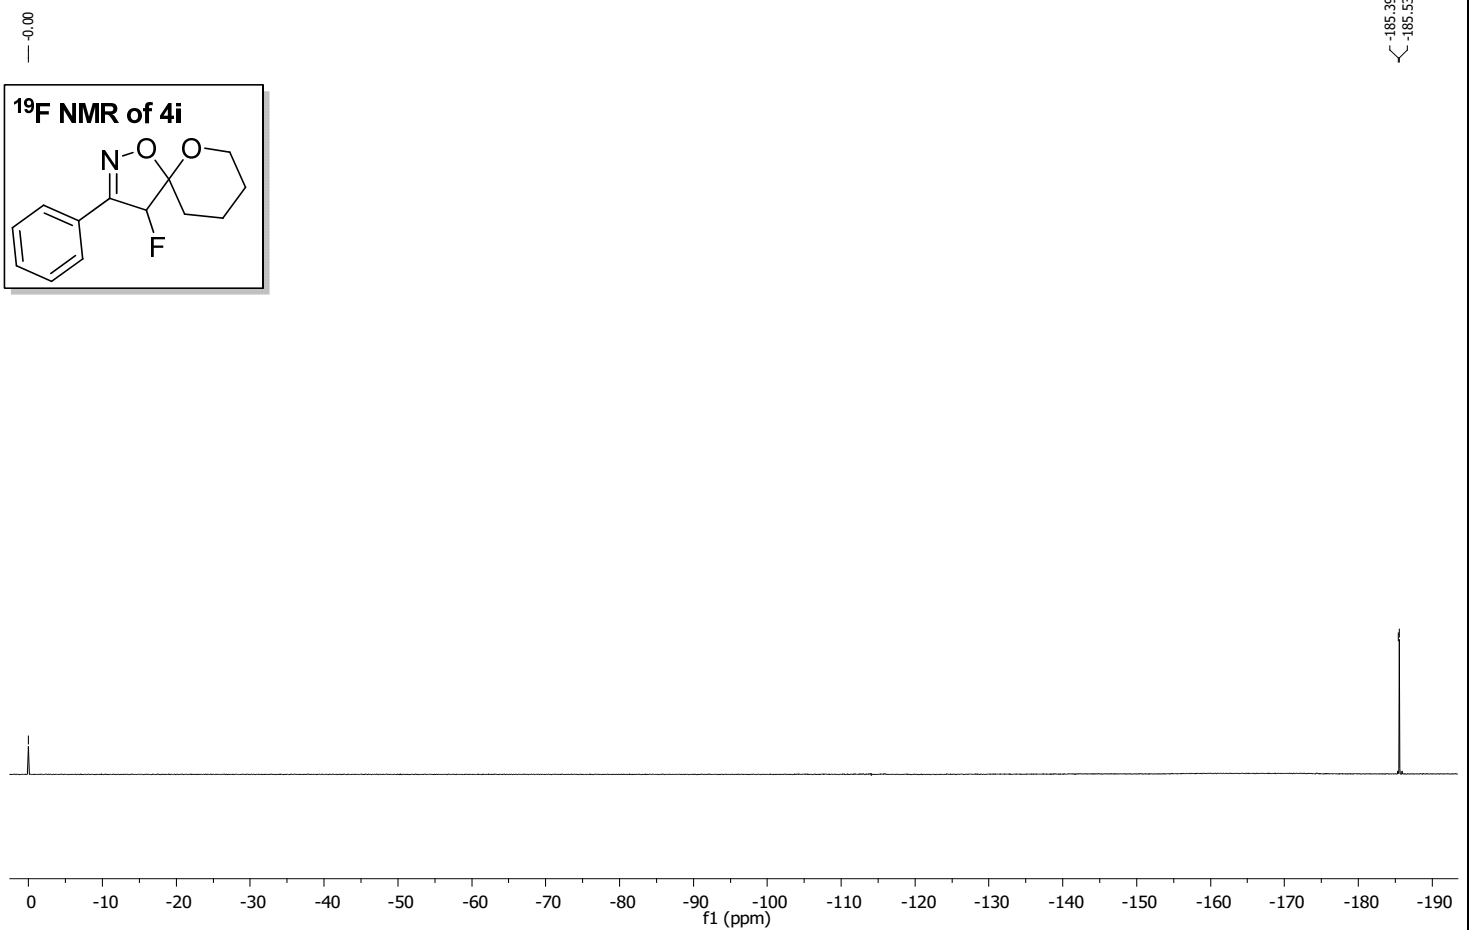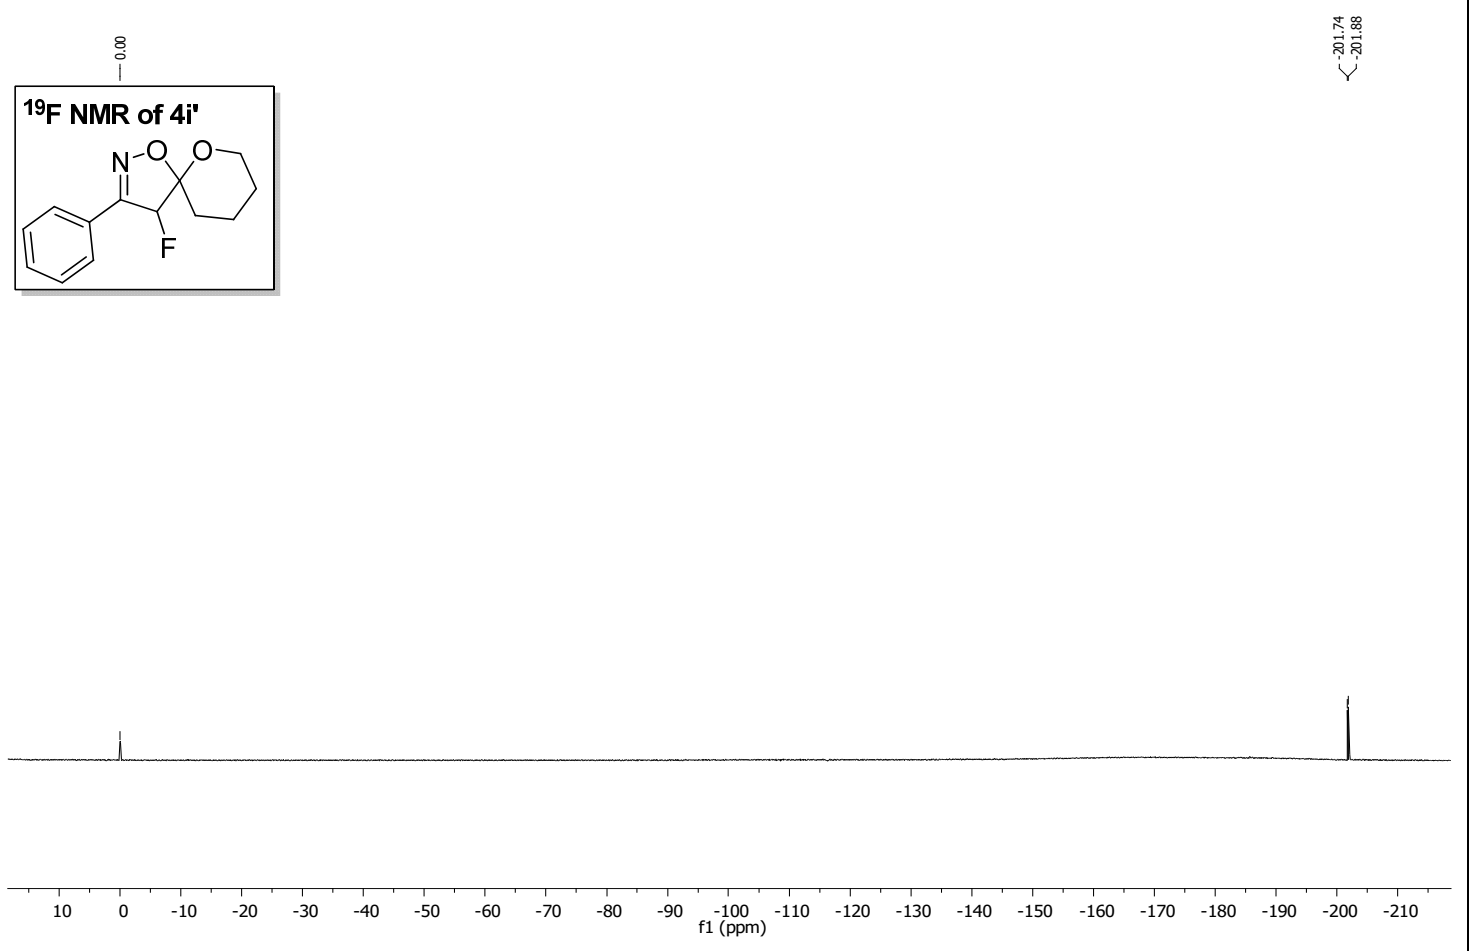

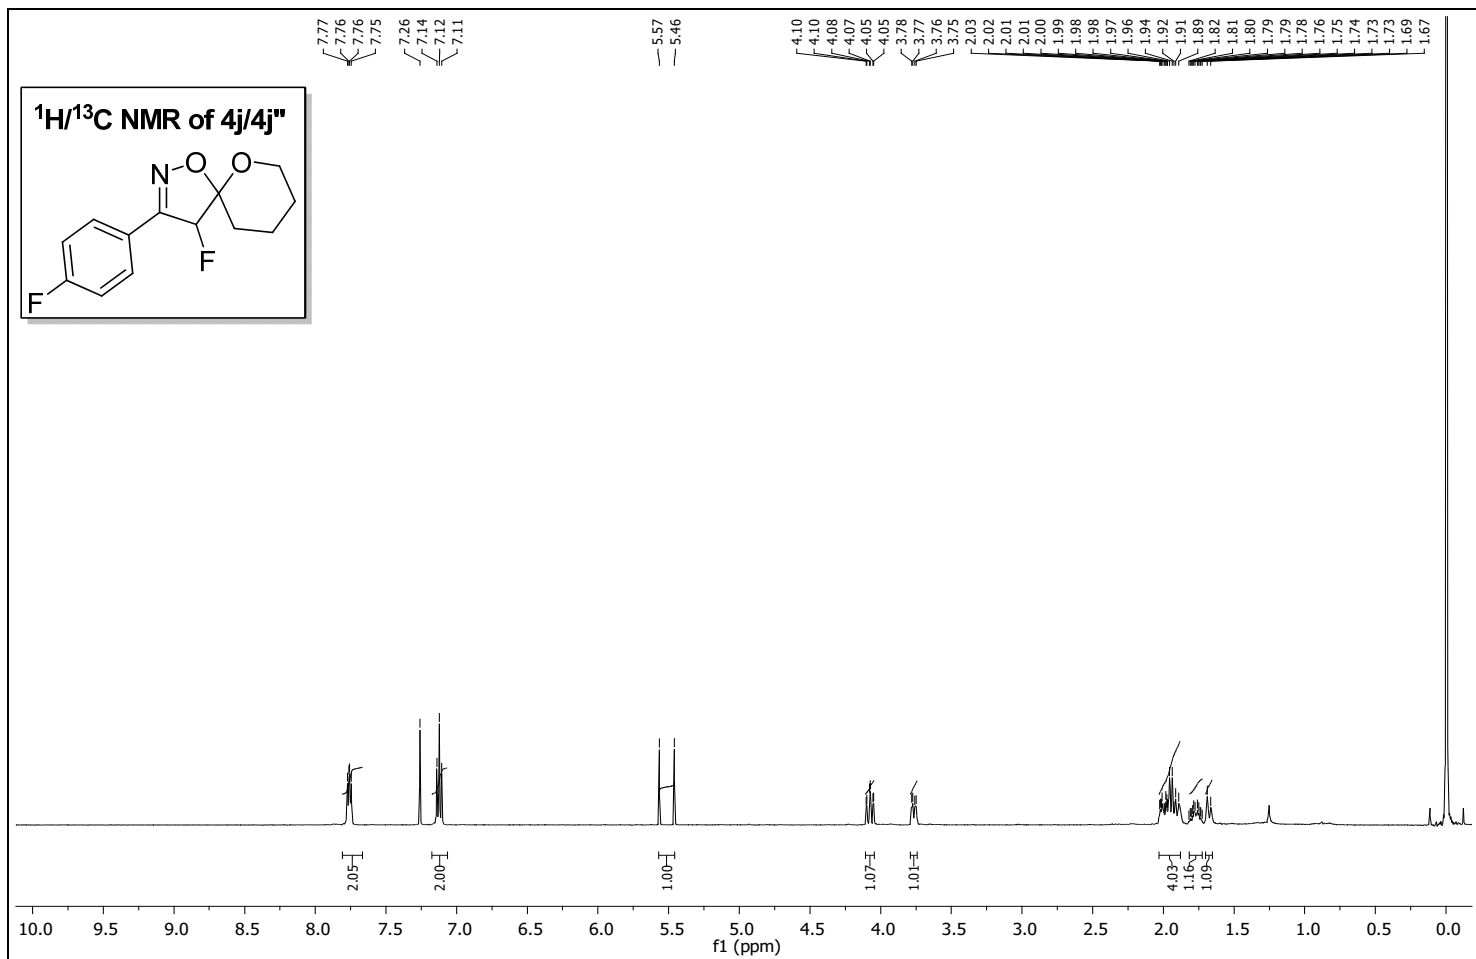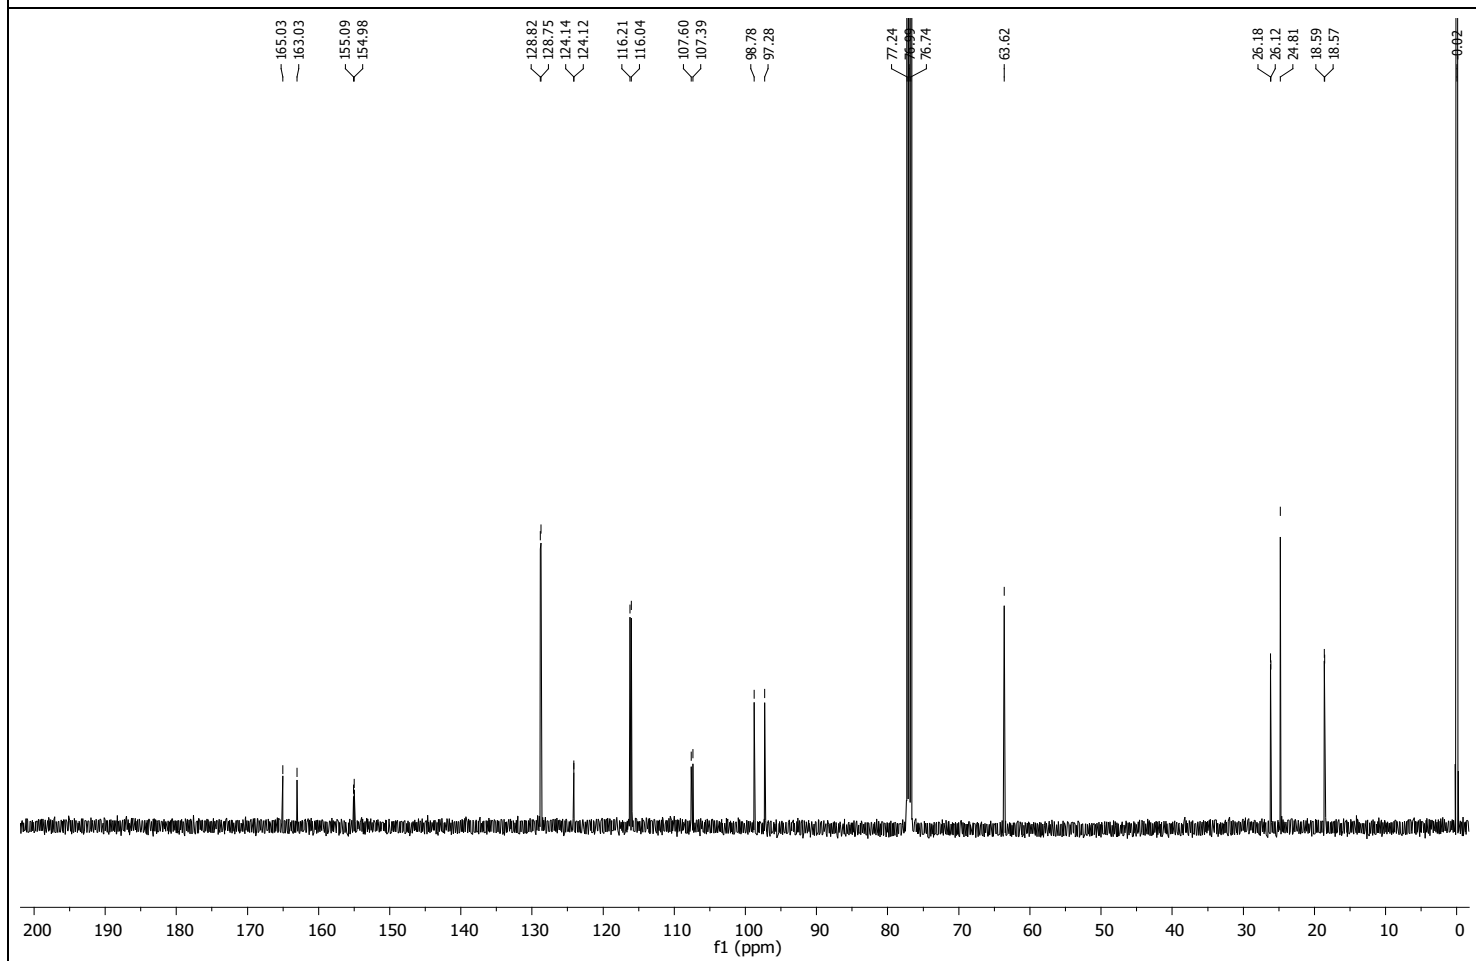

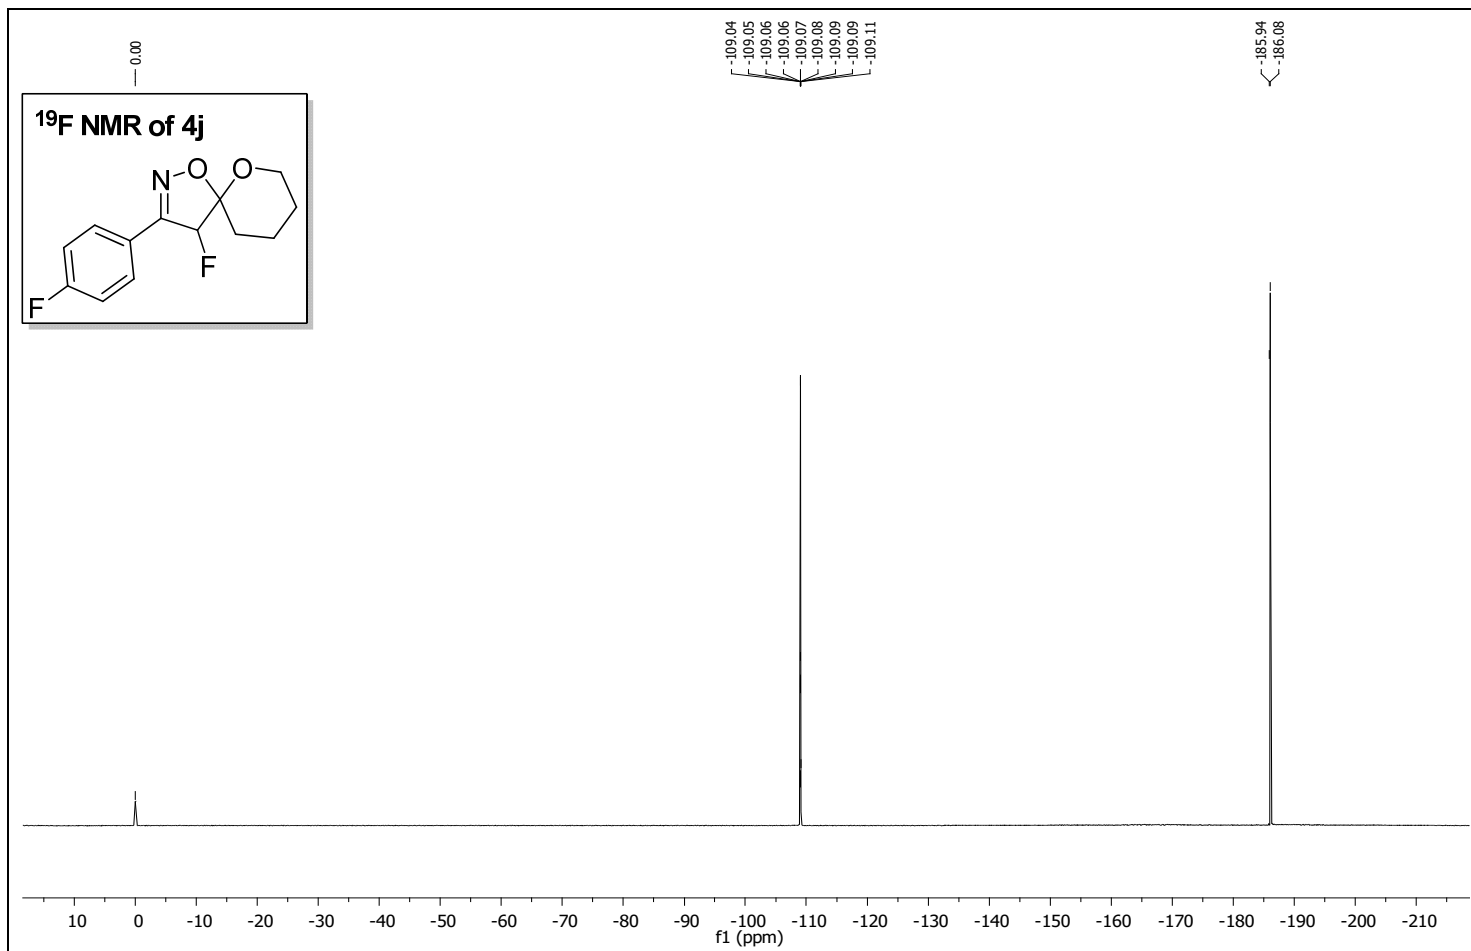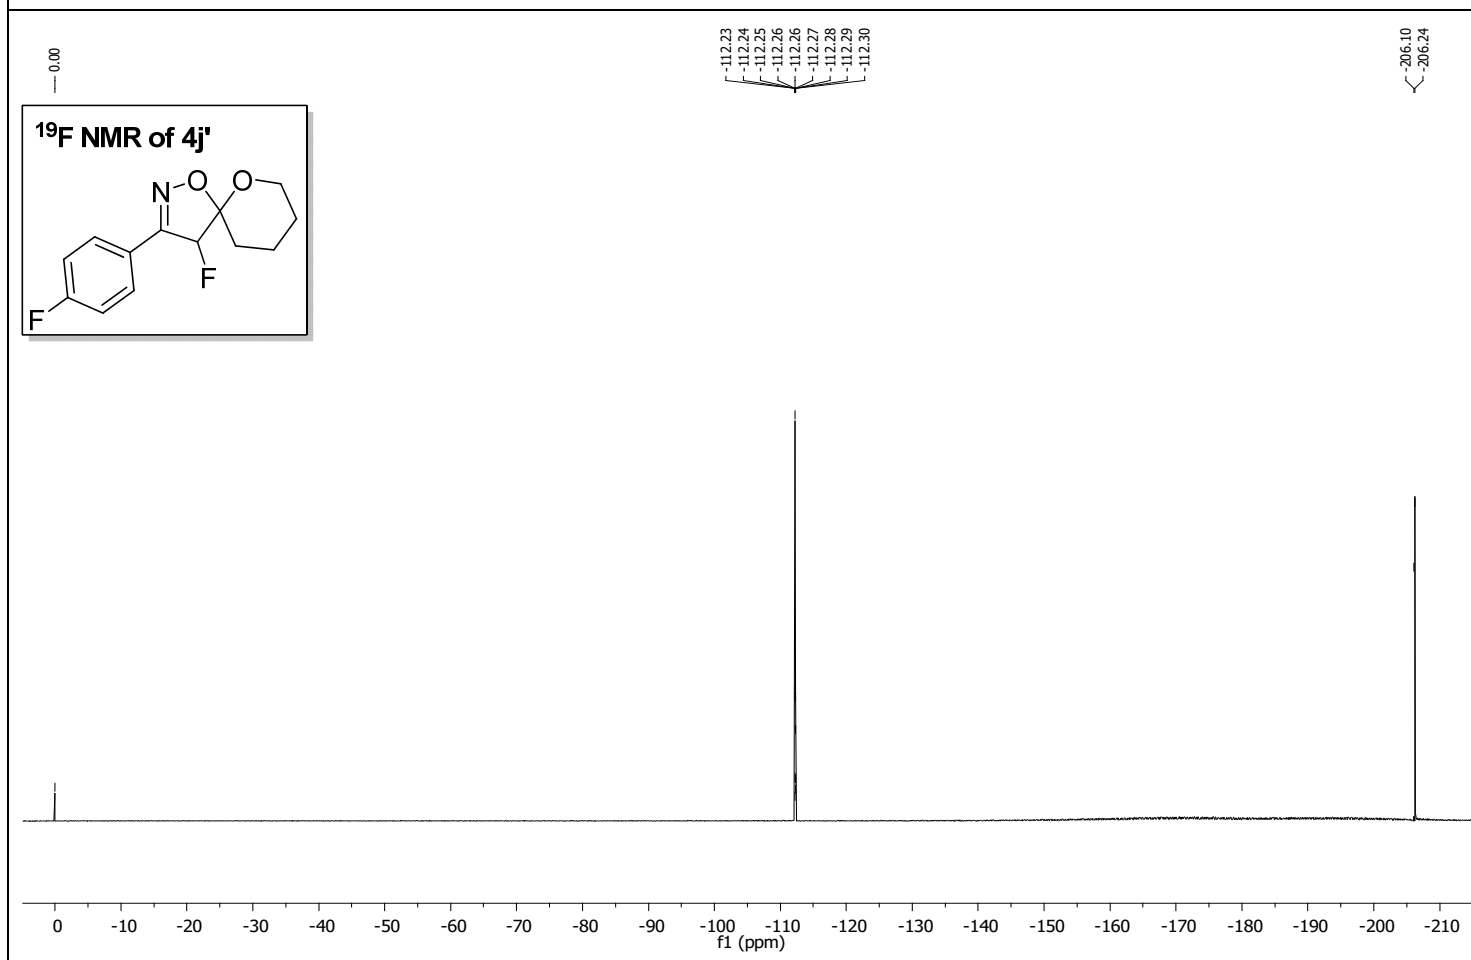

**<sup>1</sup>H/<sup>13</sup>C NMR of 4k/4k'**

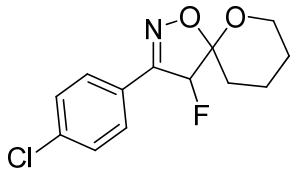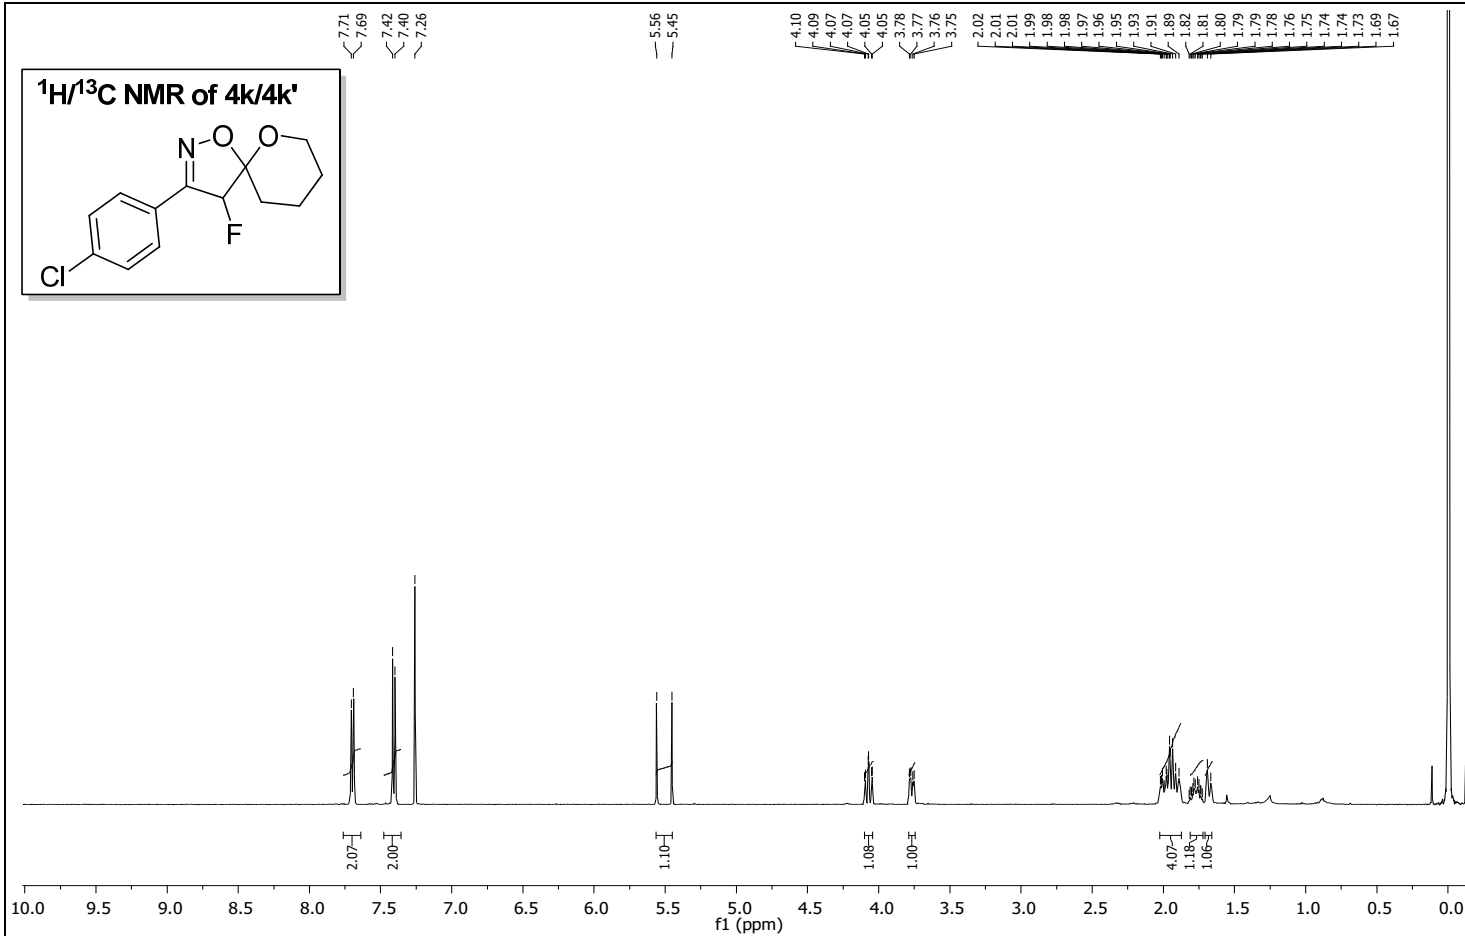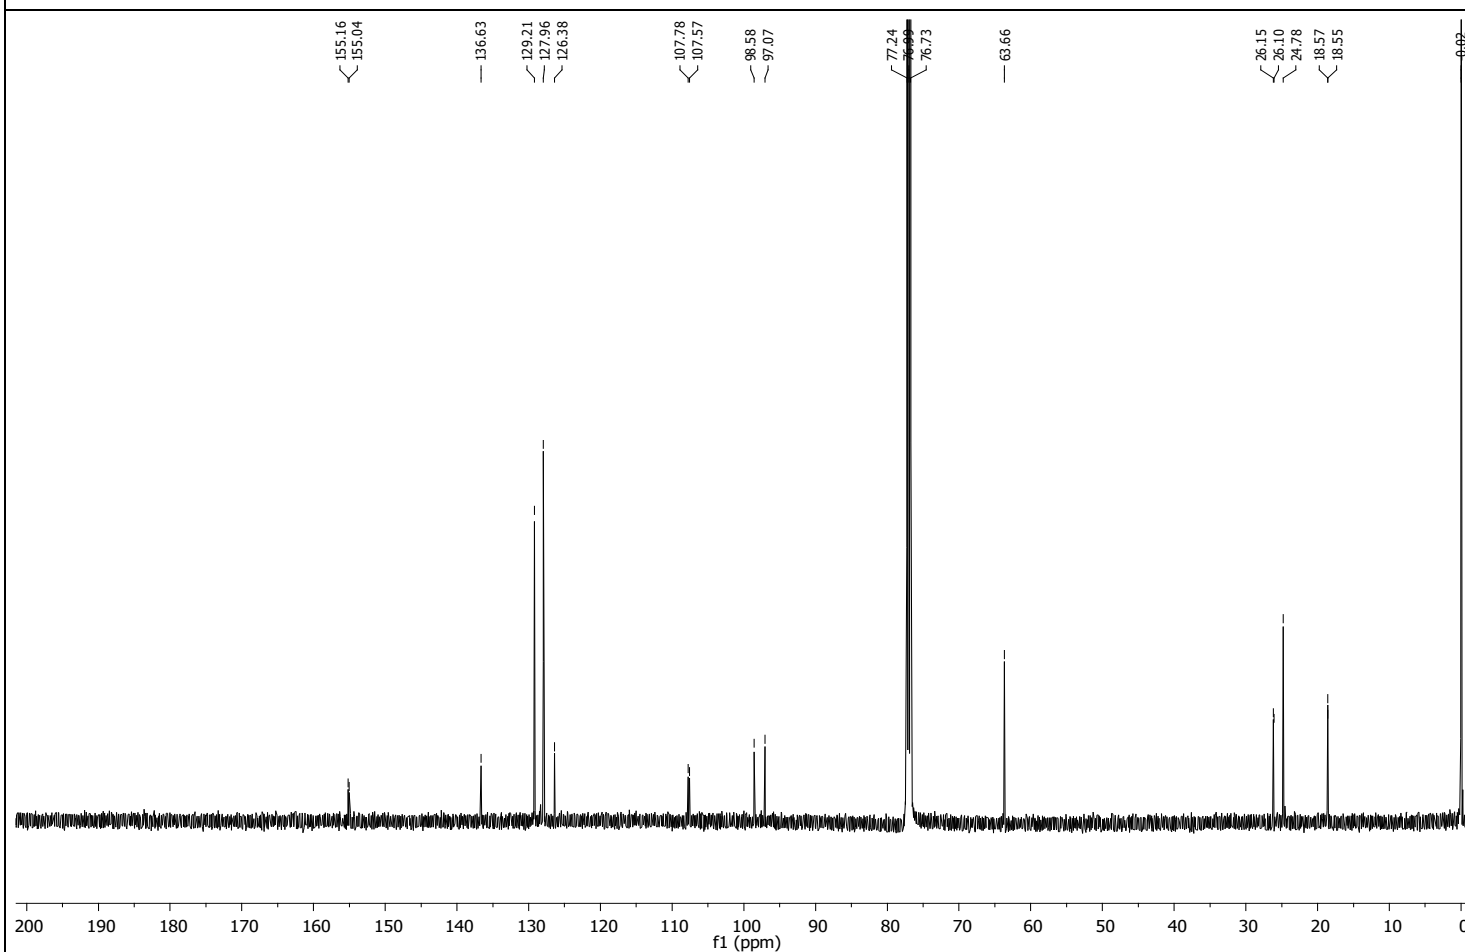



-0.01

**<sup>19</sup>F NMR of 4k**

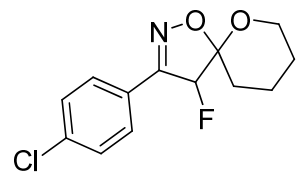

-185.77  
-185.91

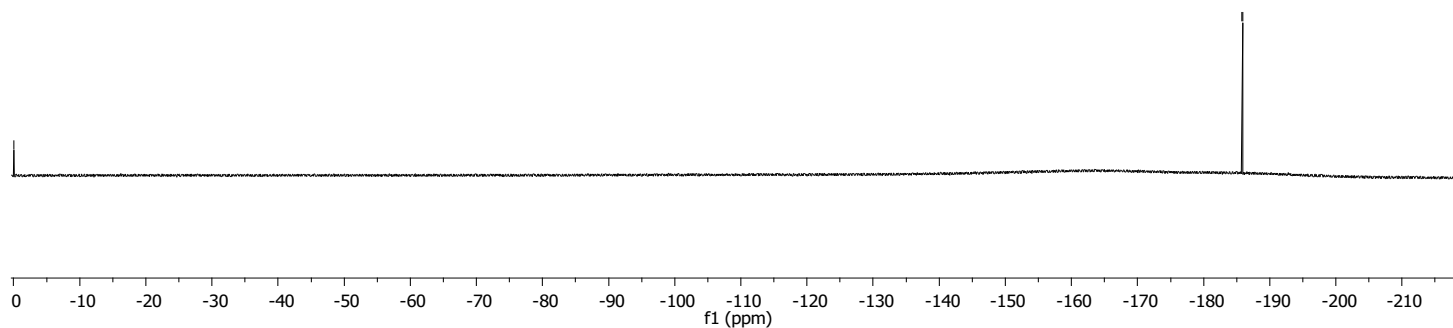

-0.00

**<sup>19</sup>F NMR of 4k'**

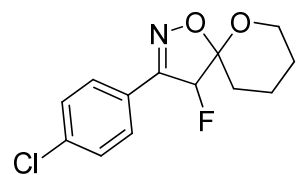

-192.68  
-192.82

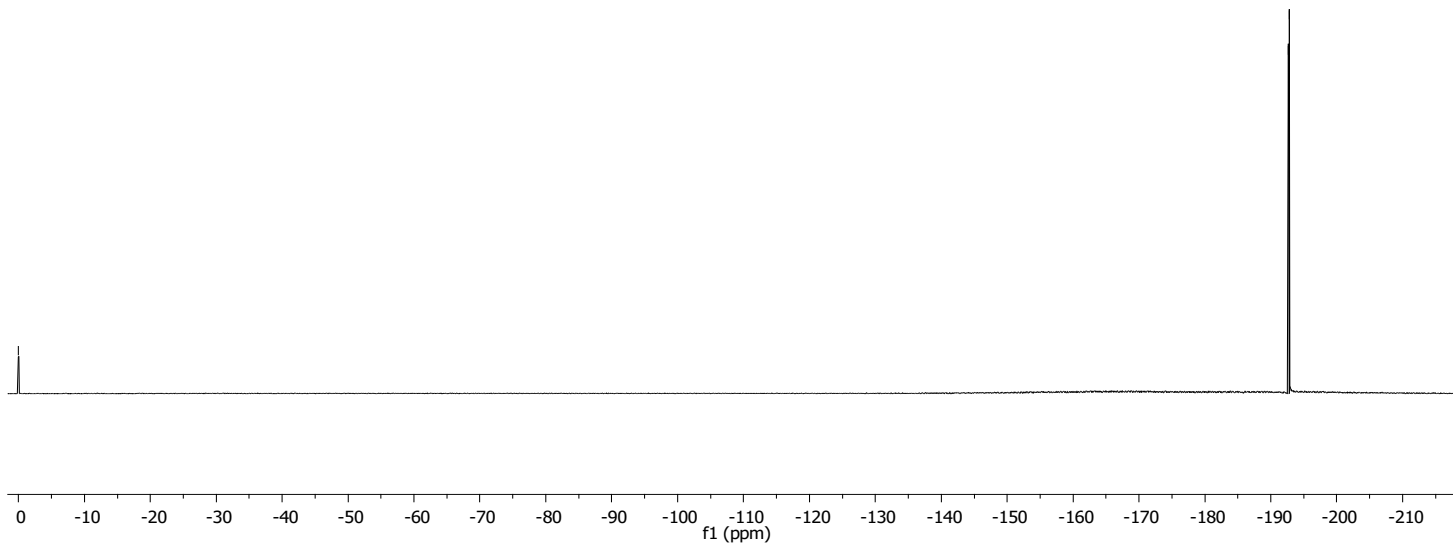

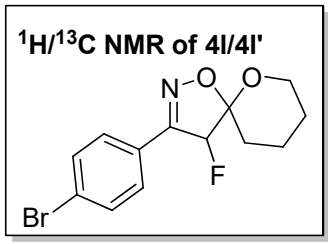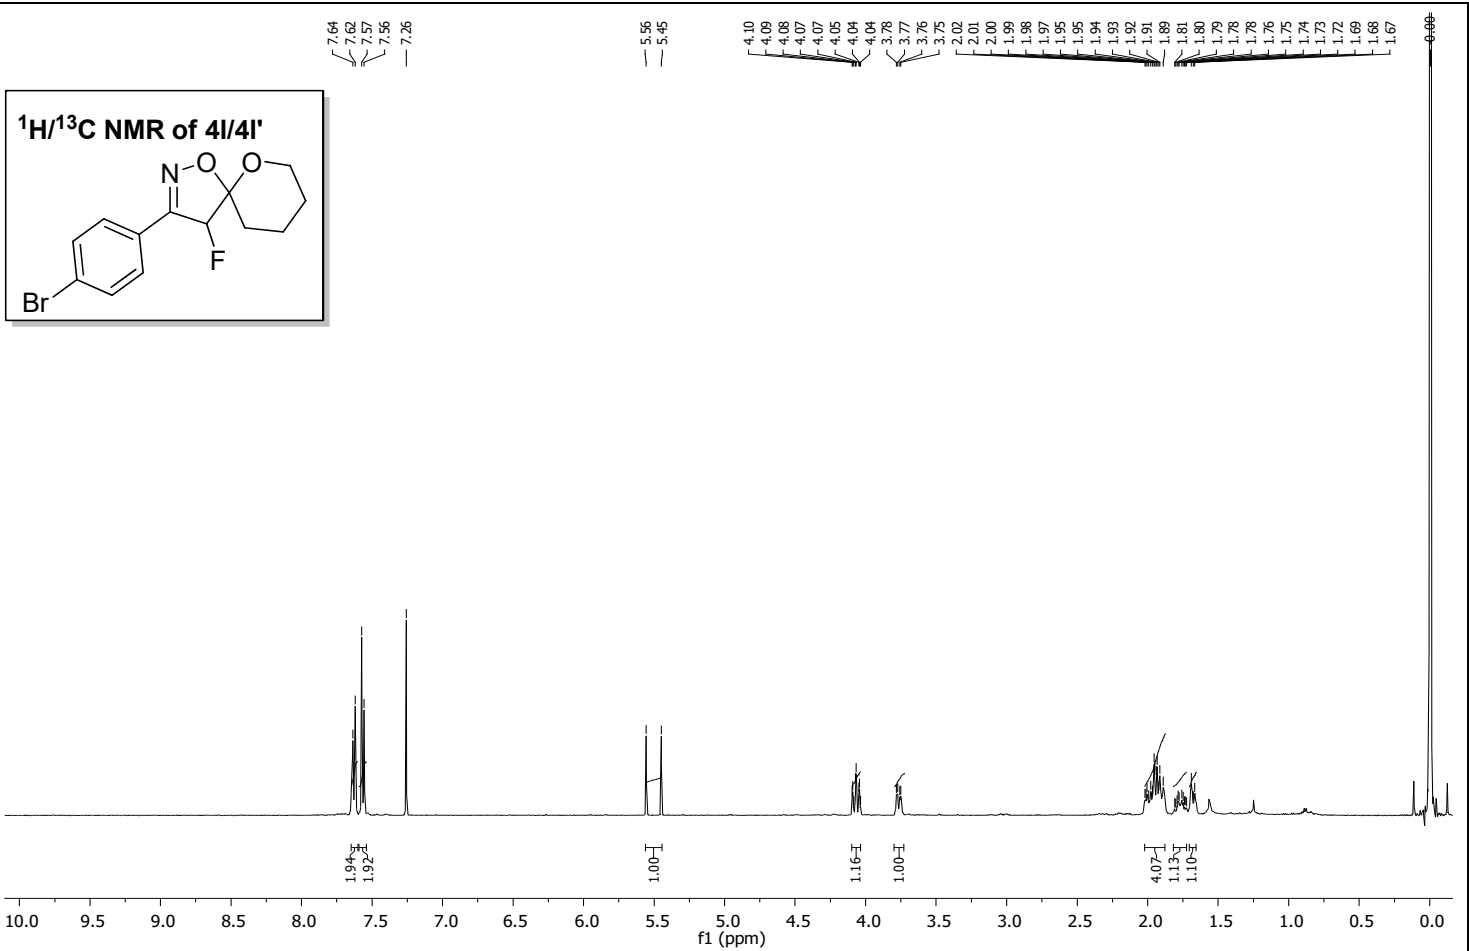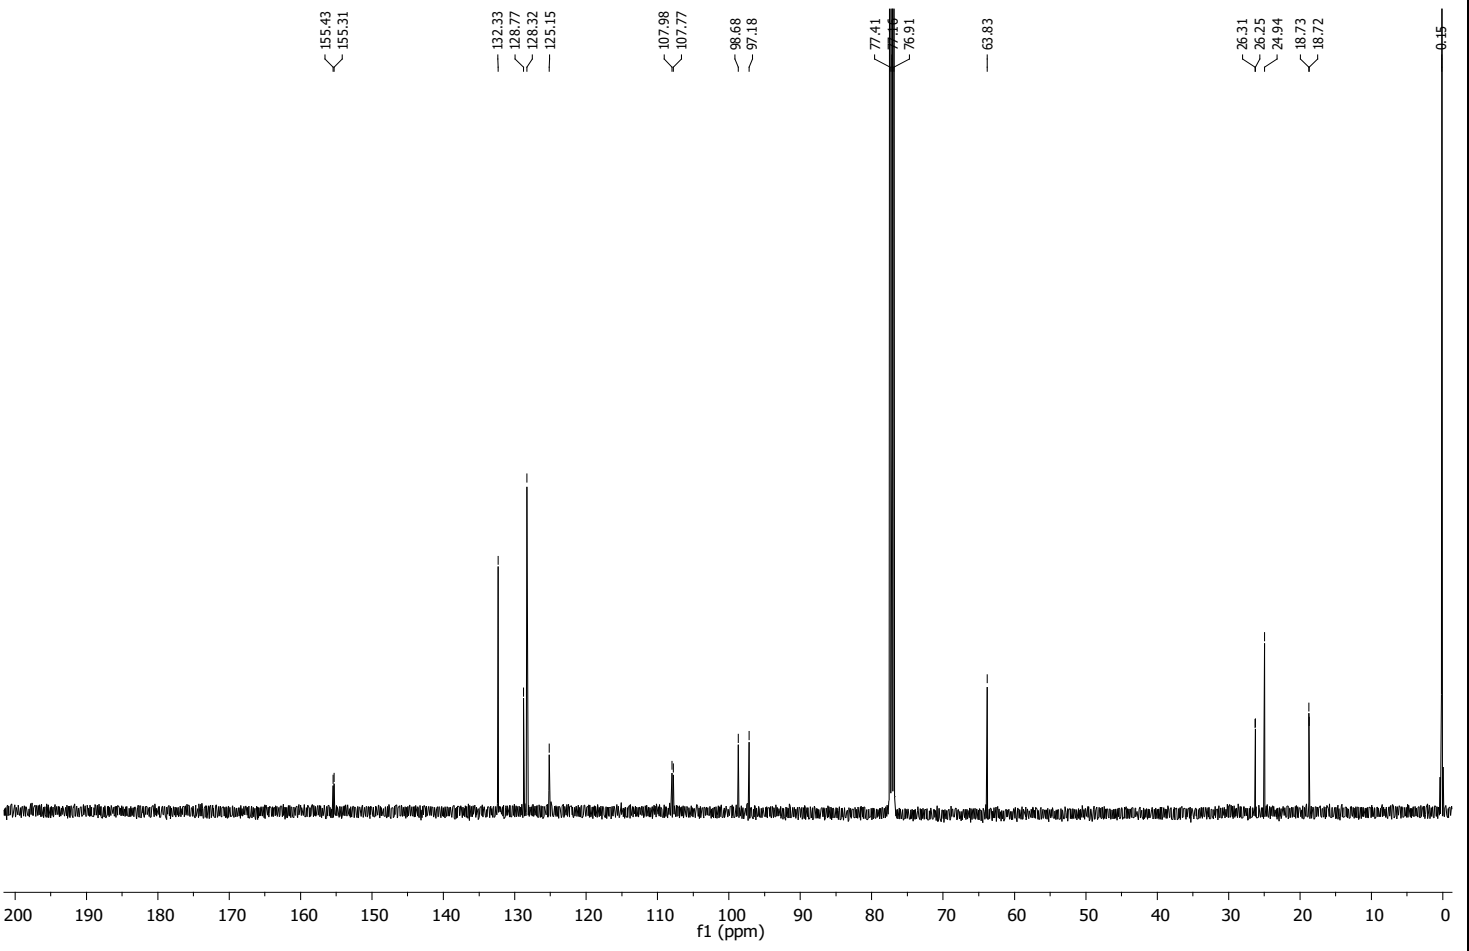

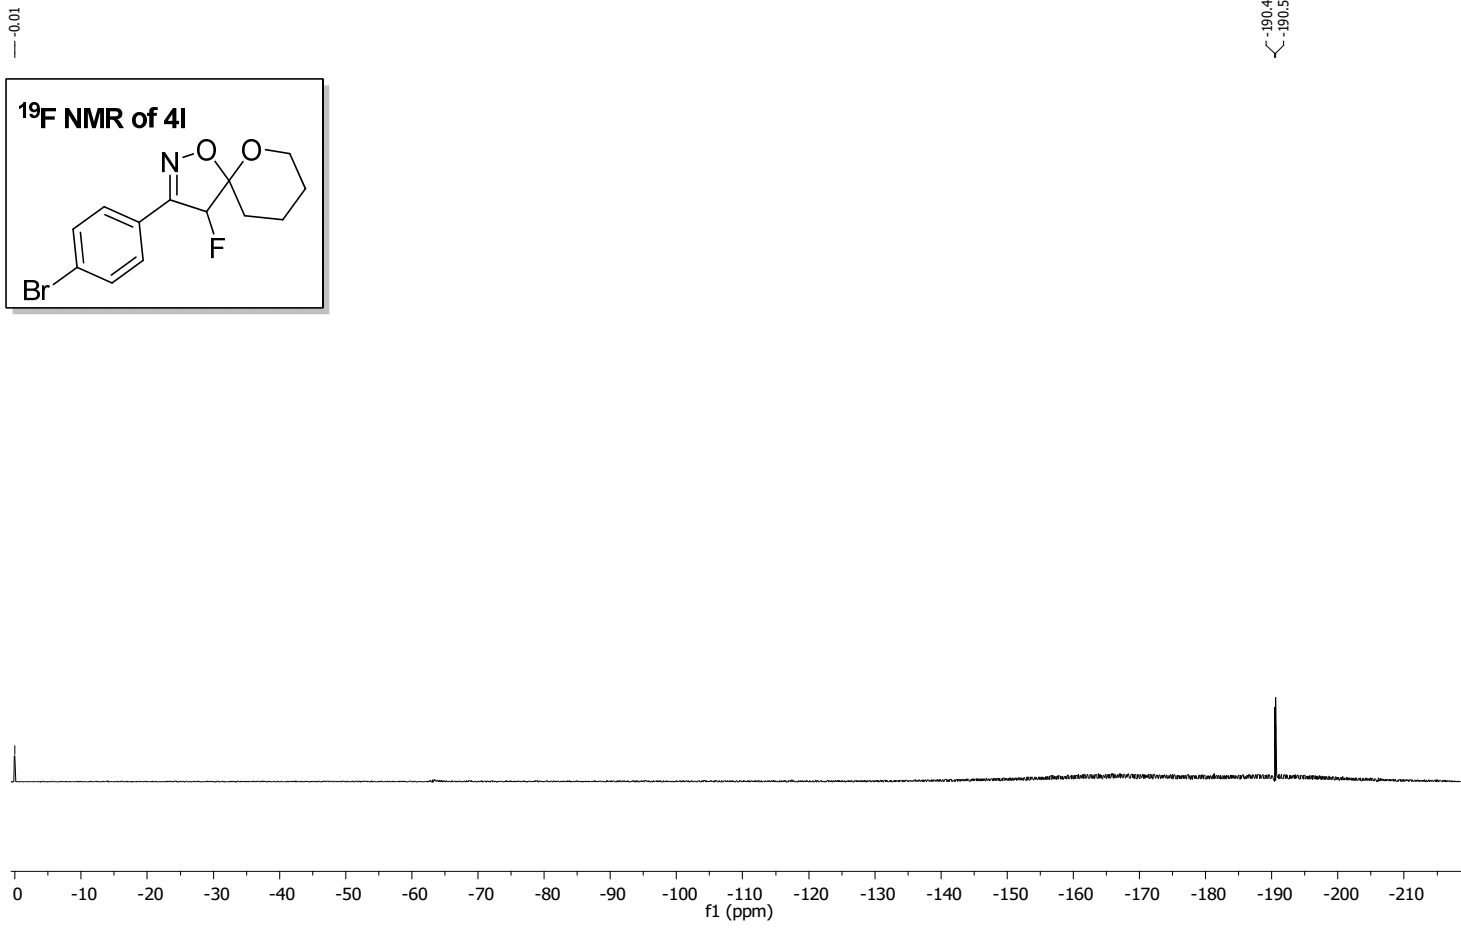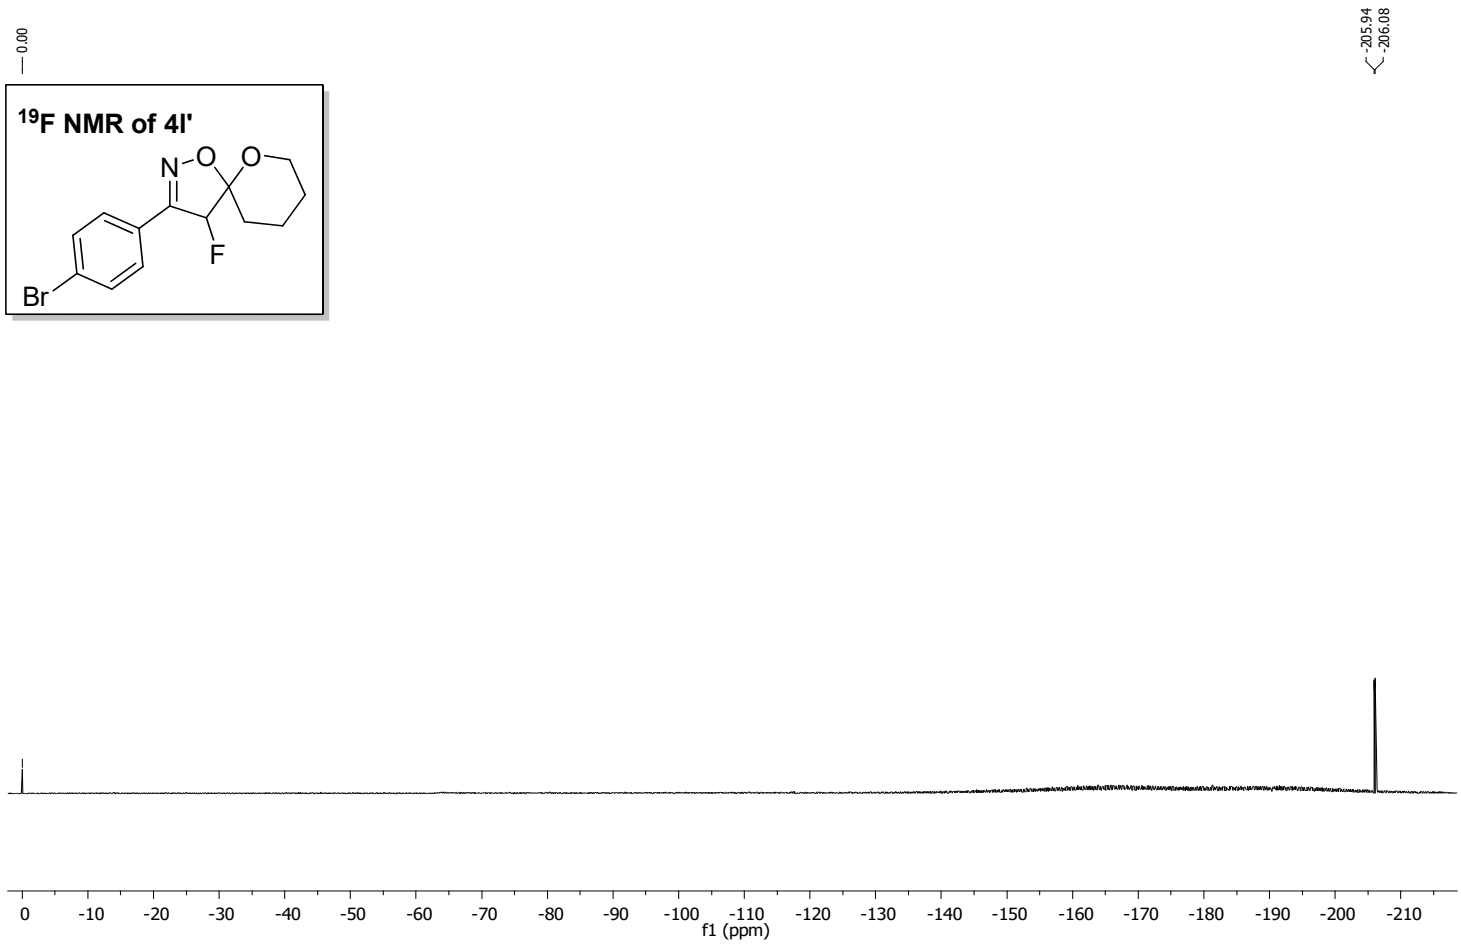

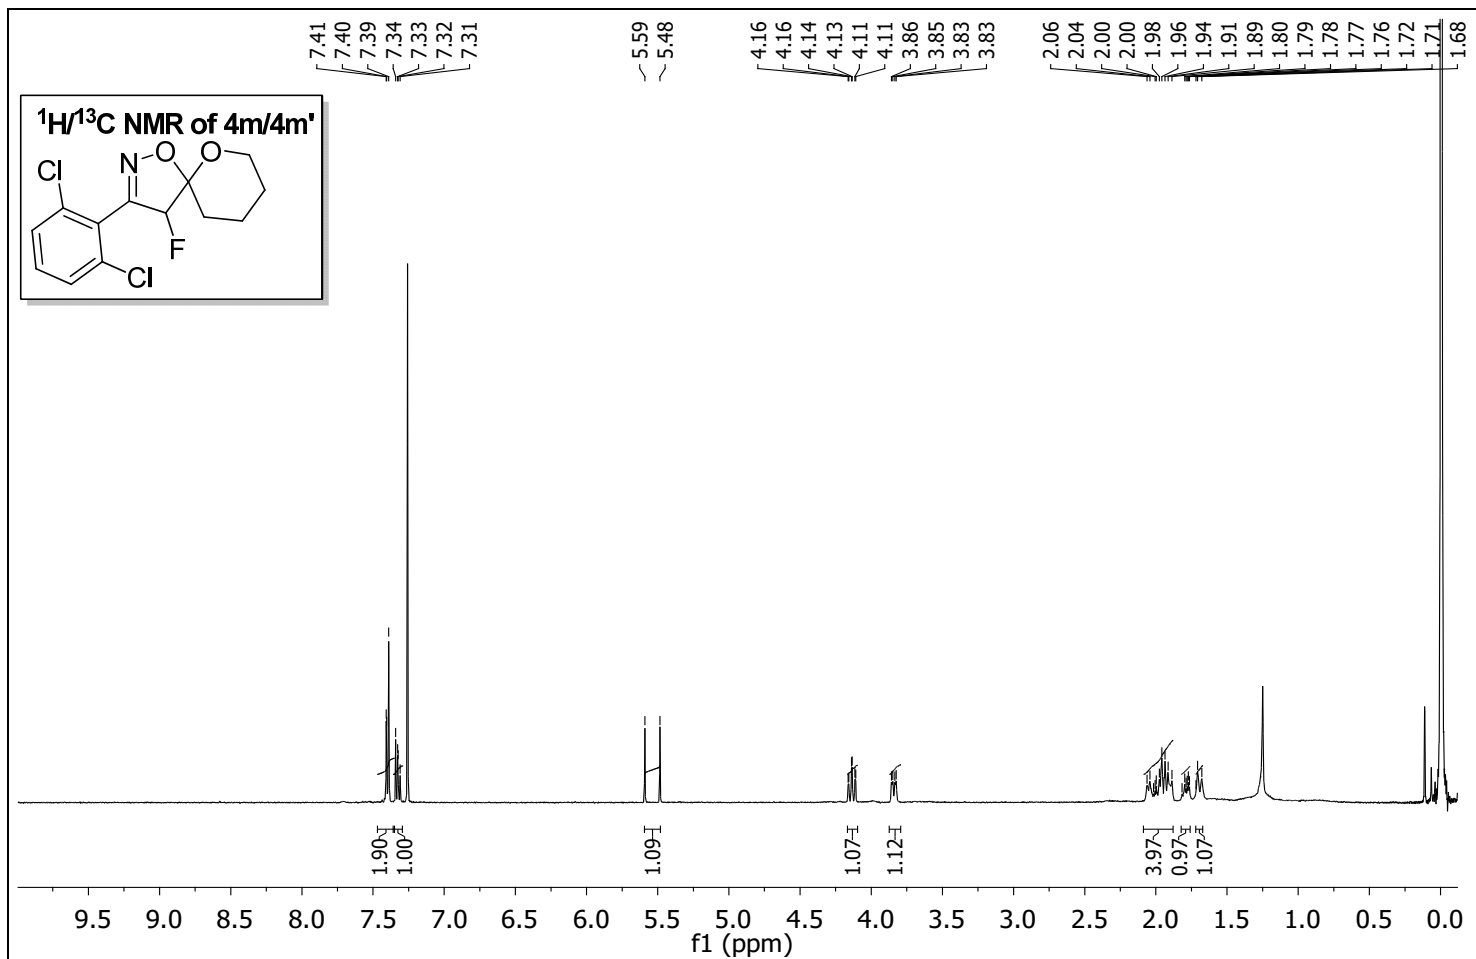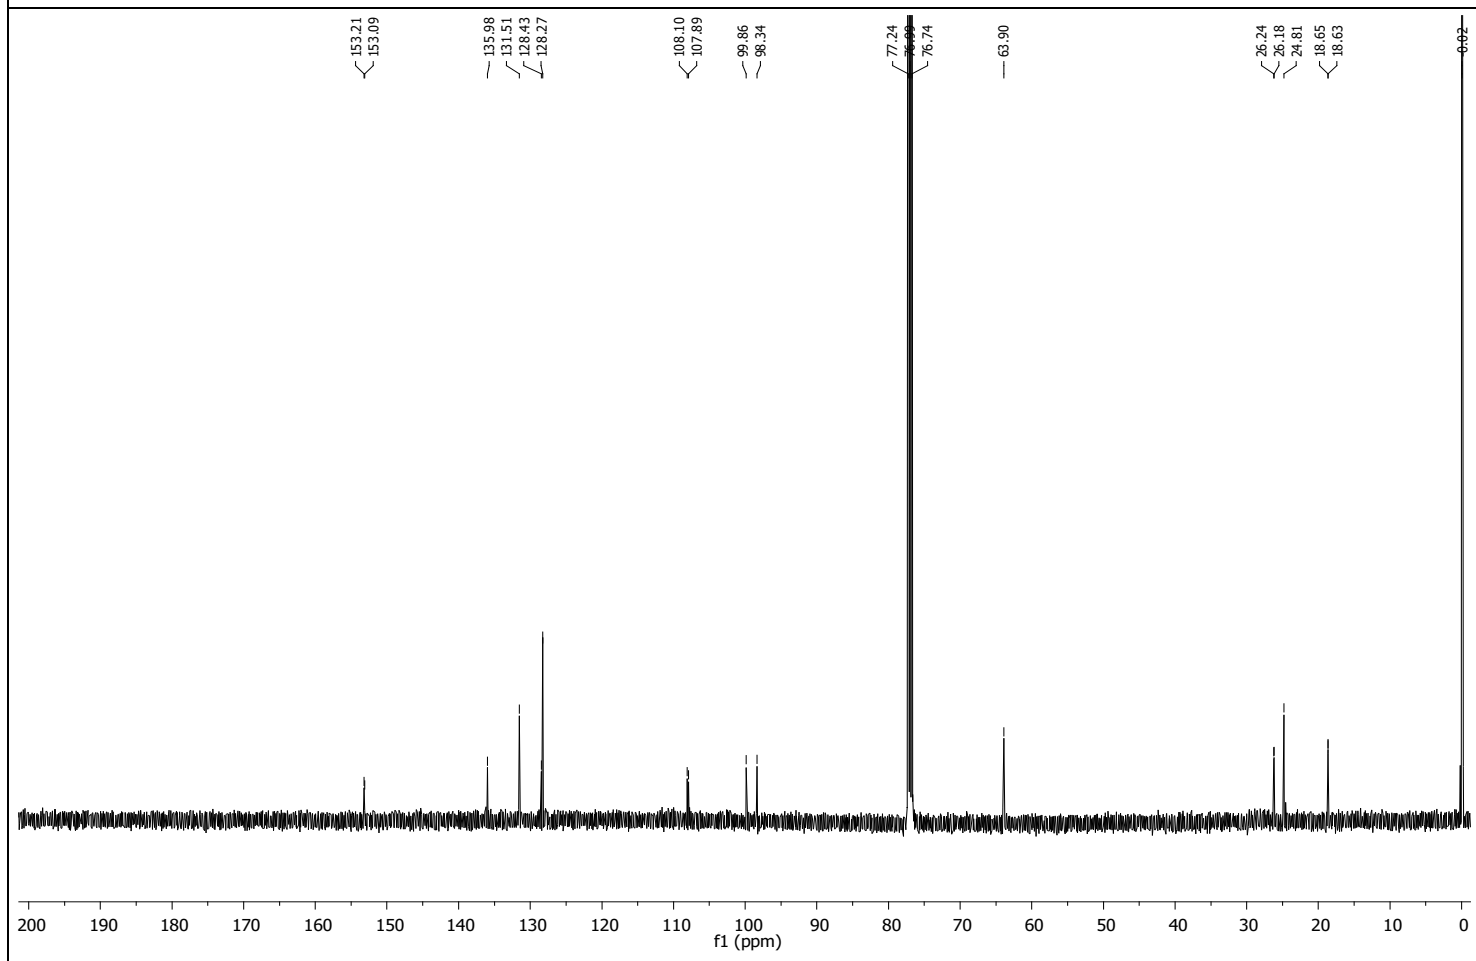

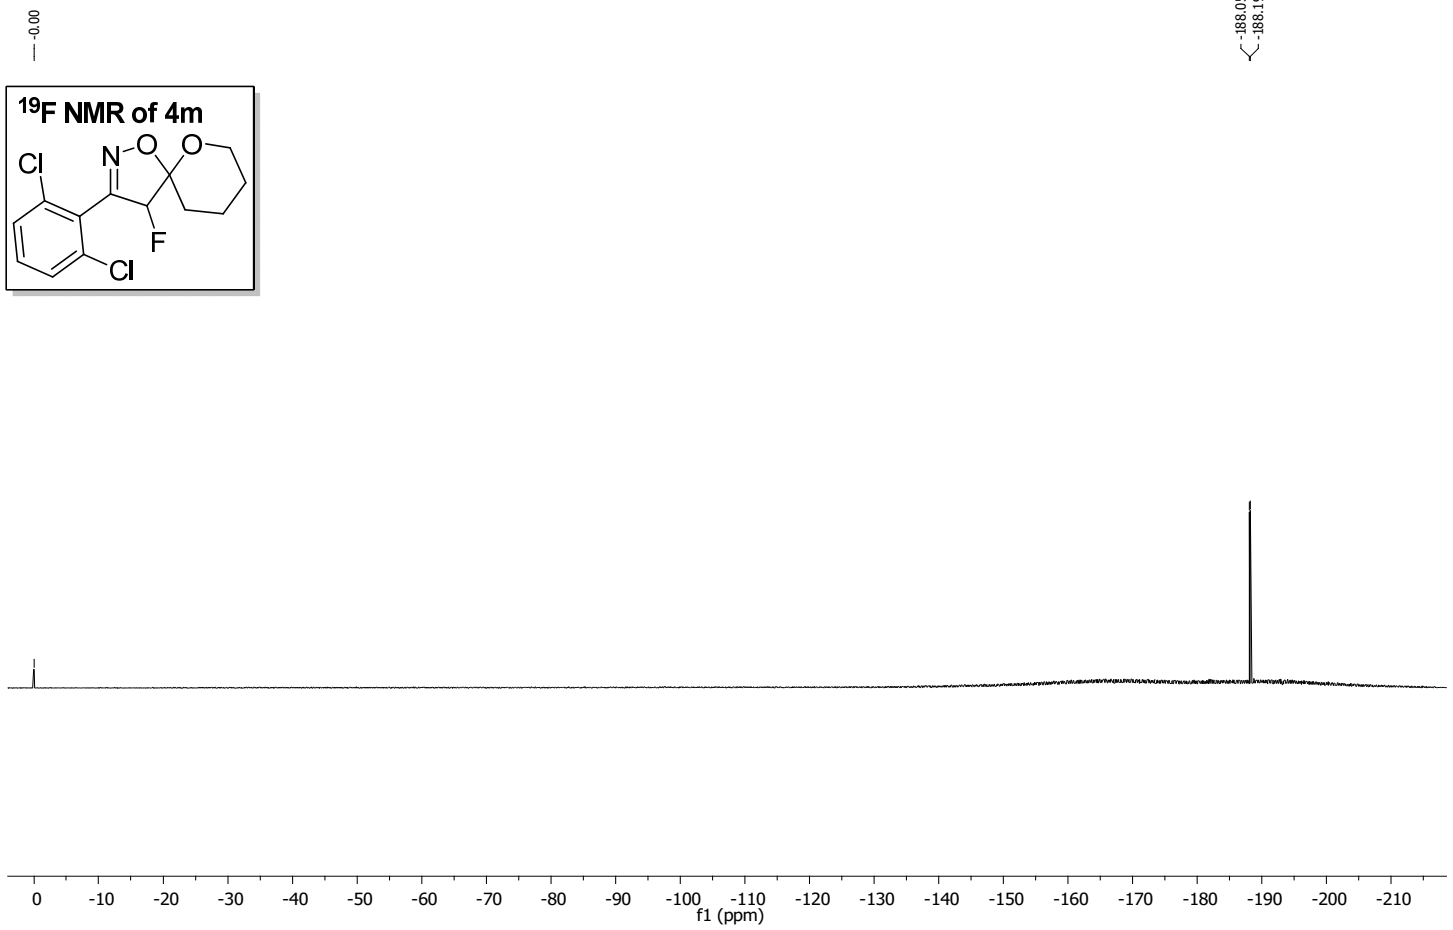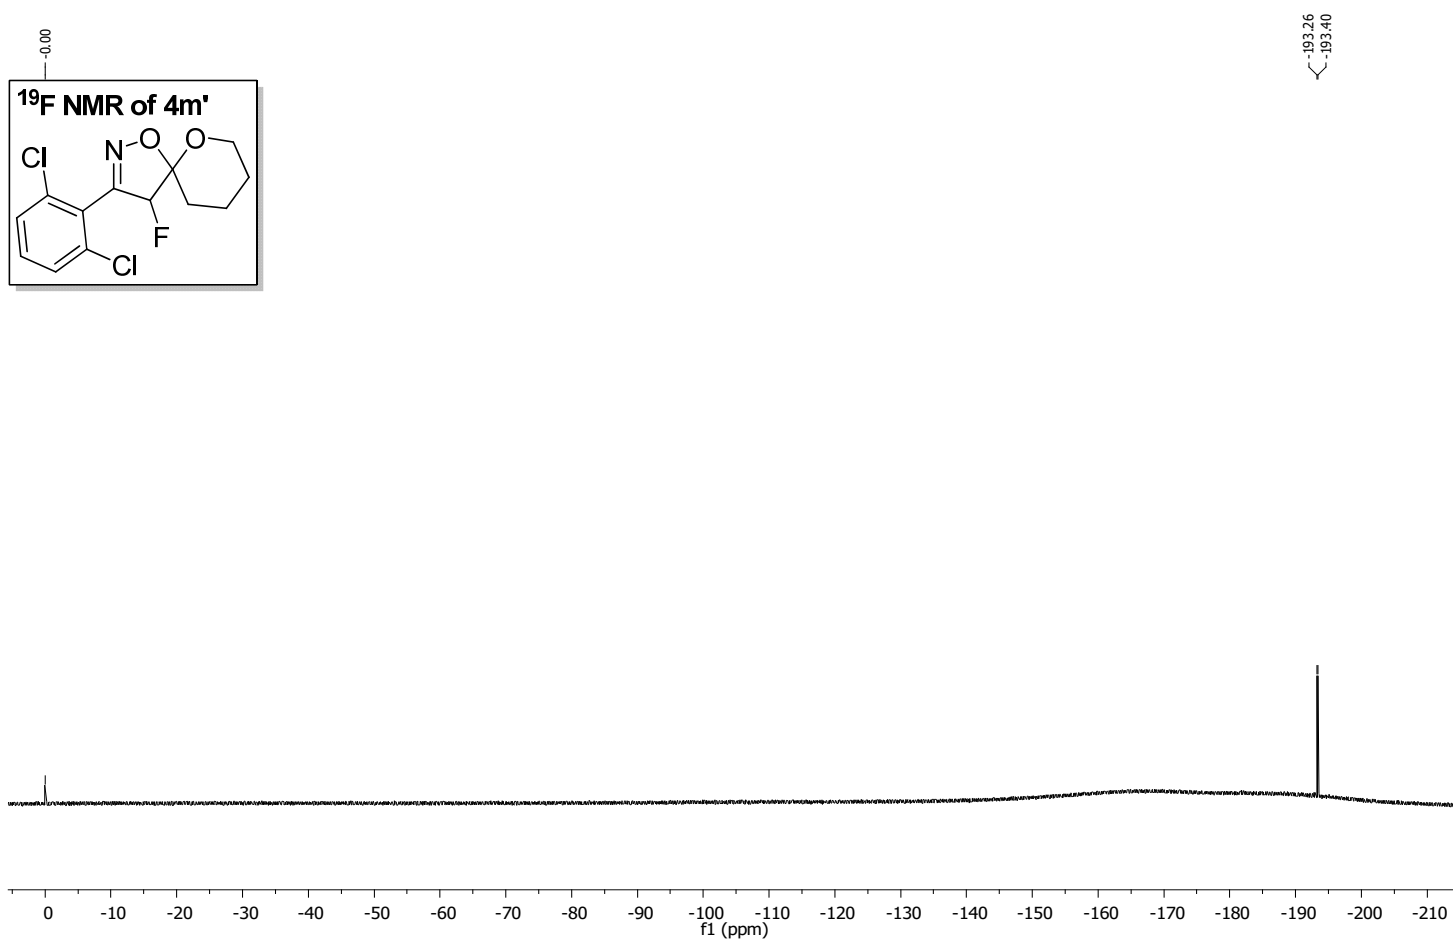

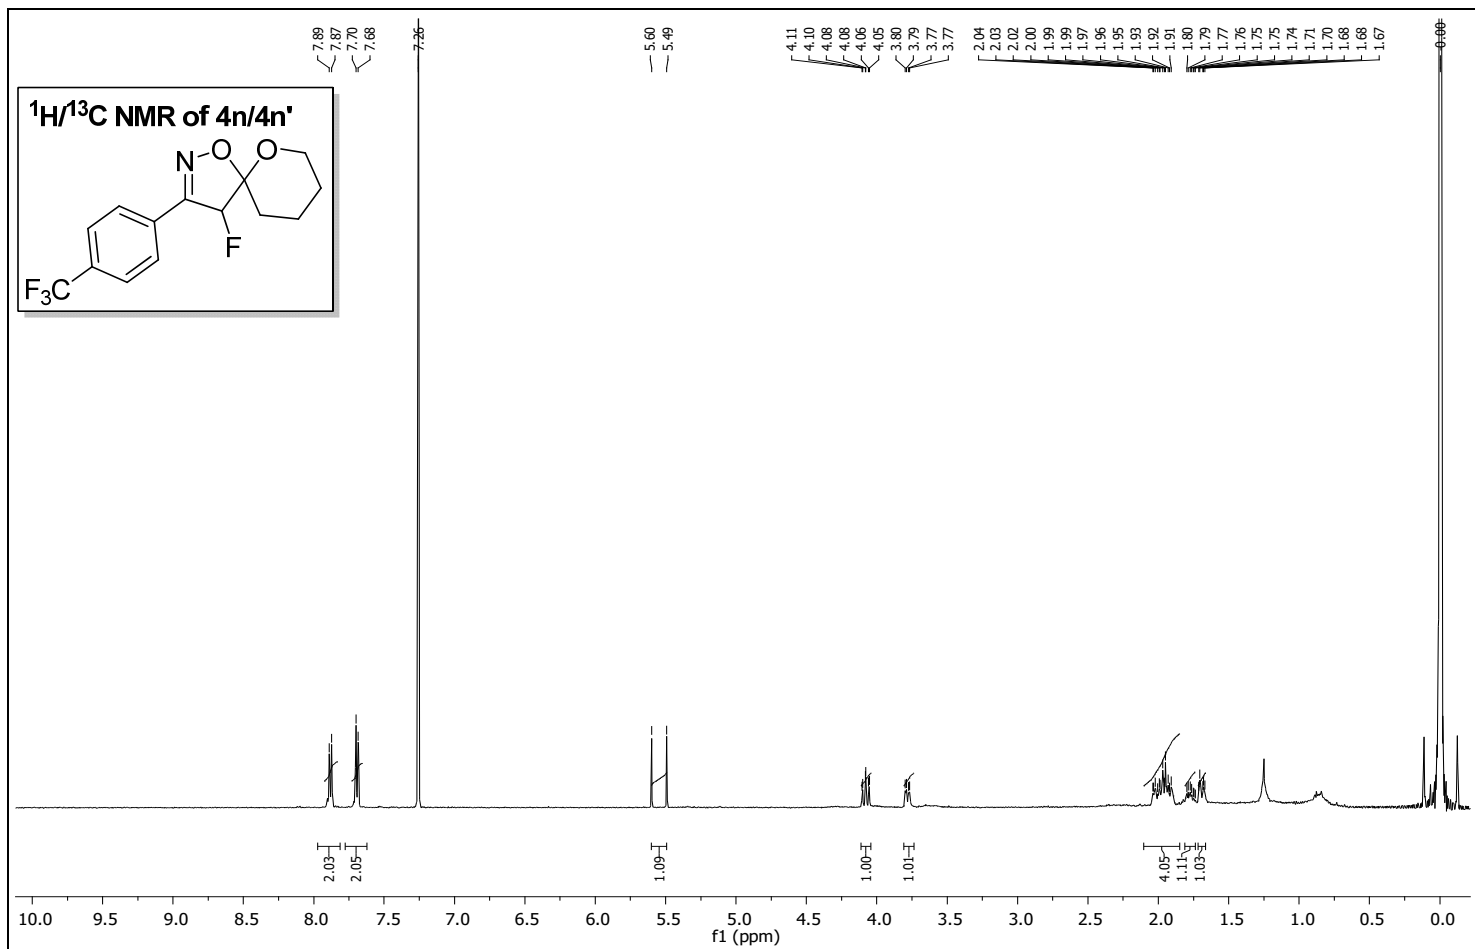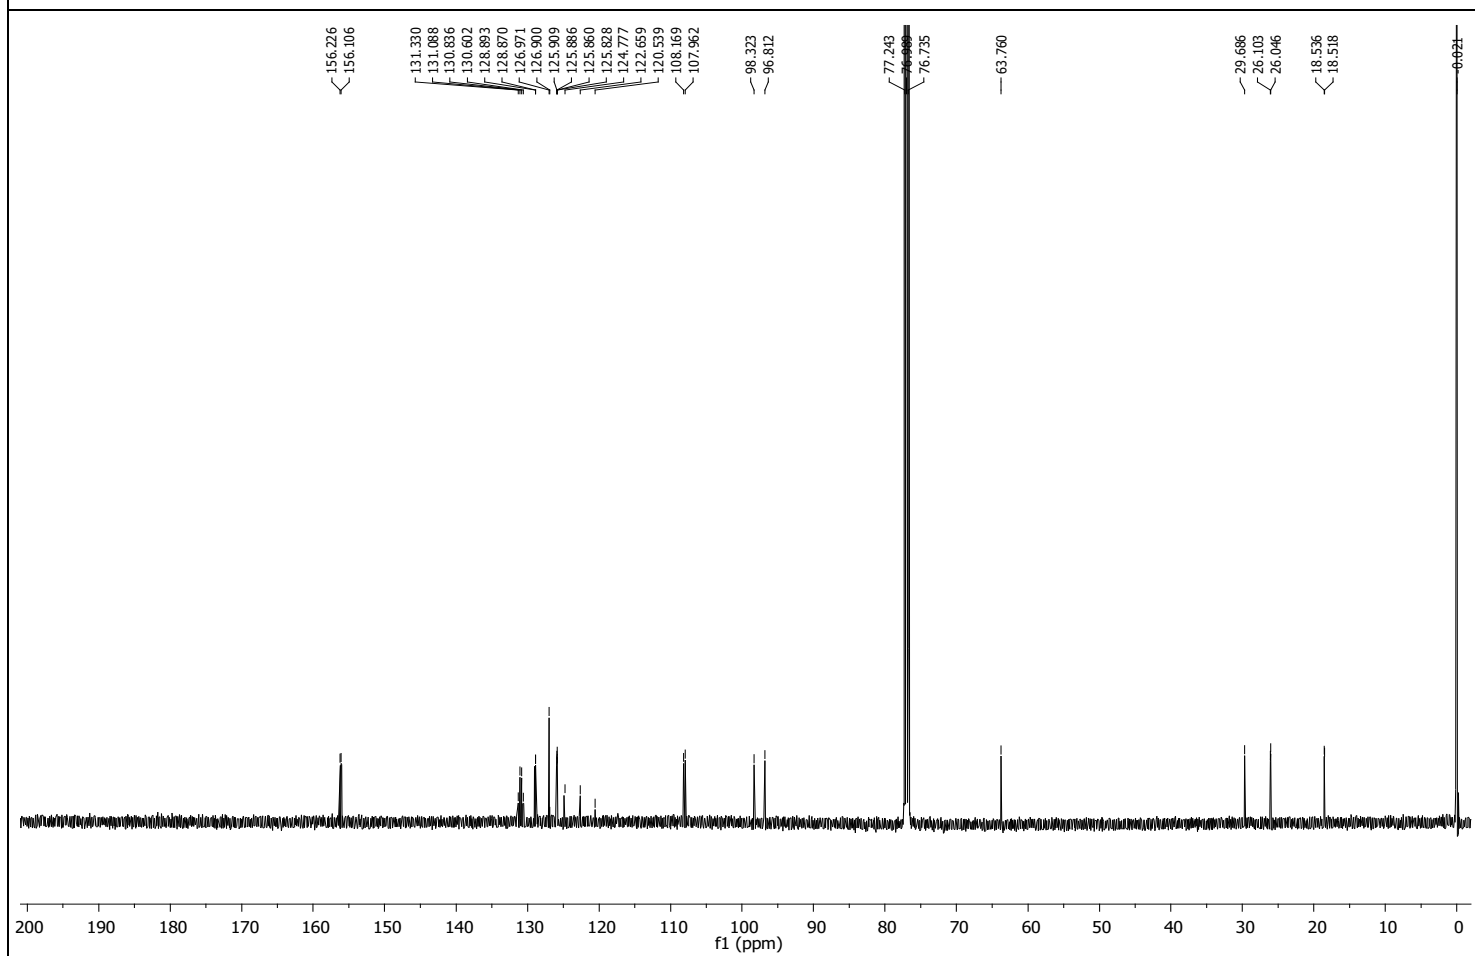

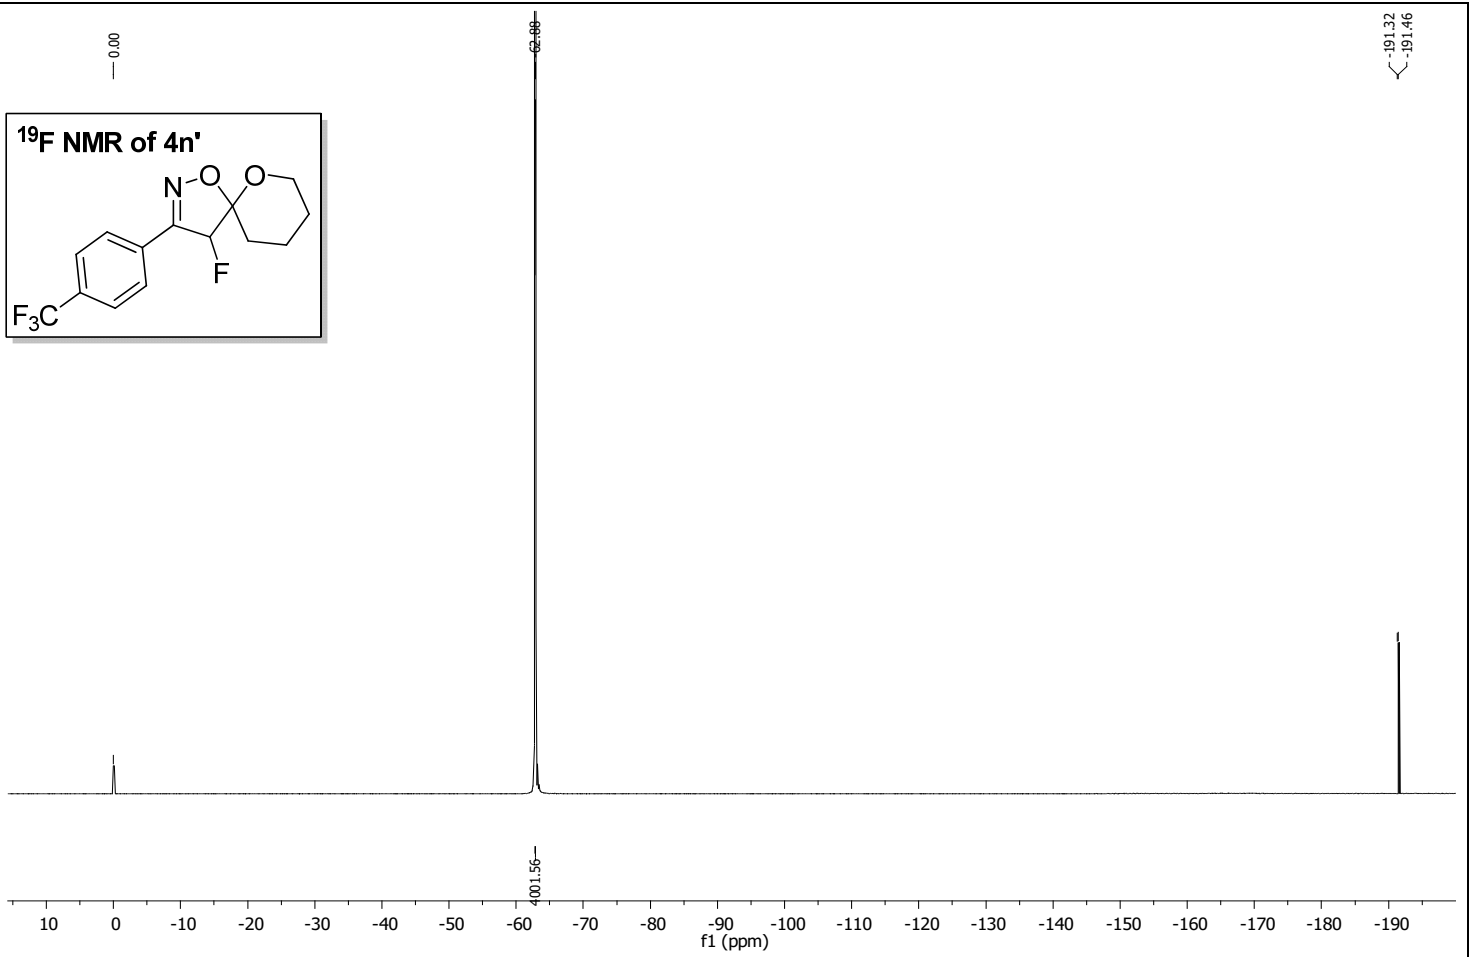

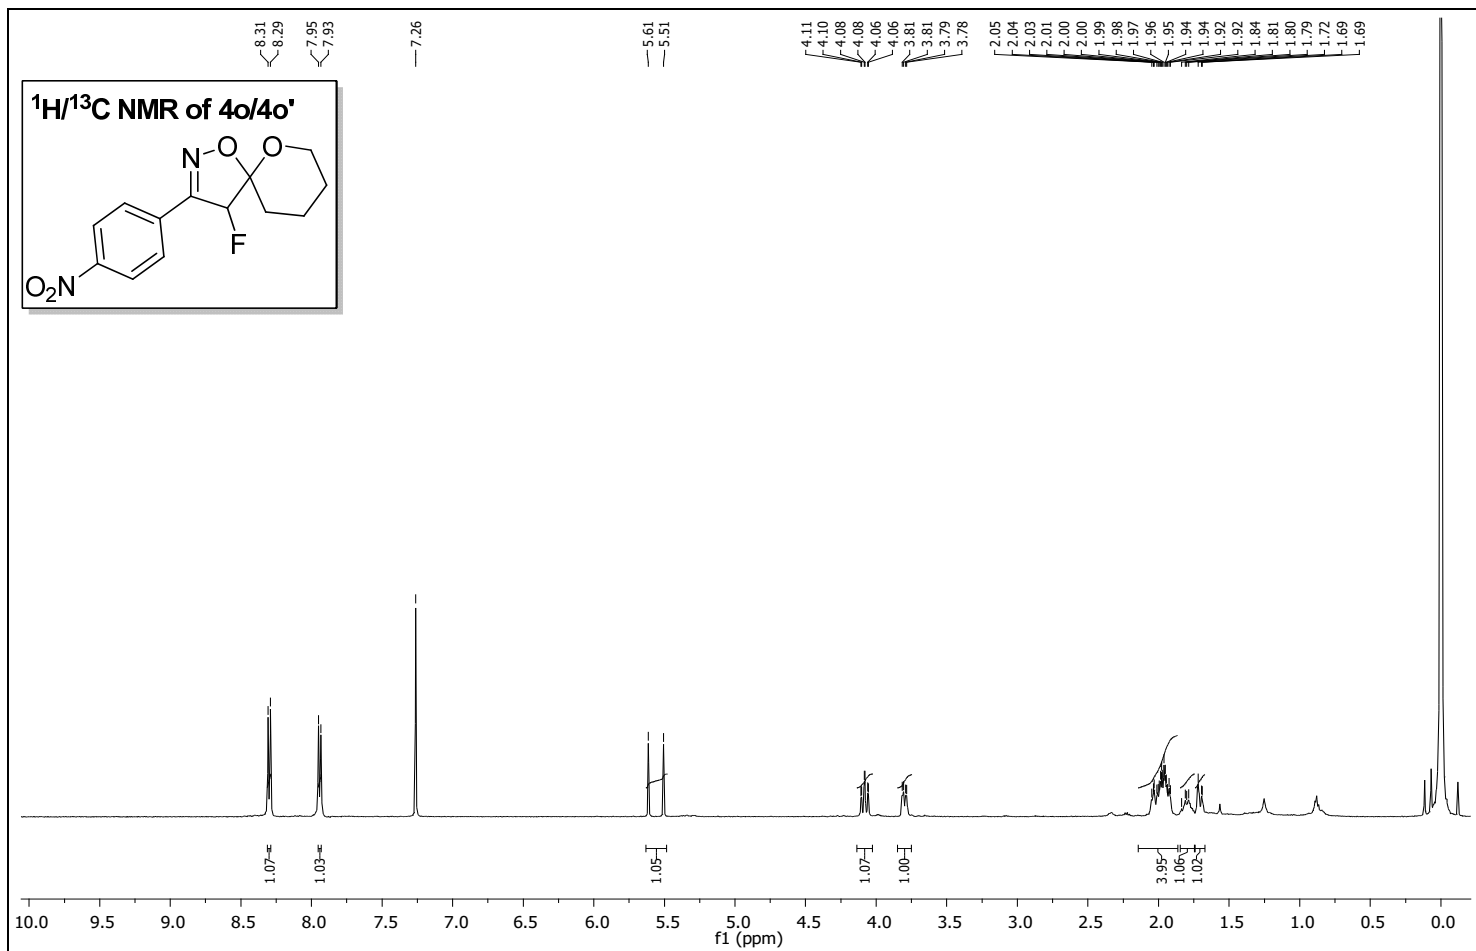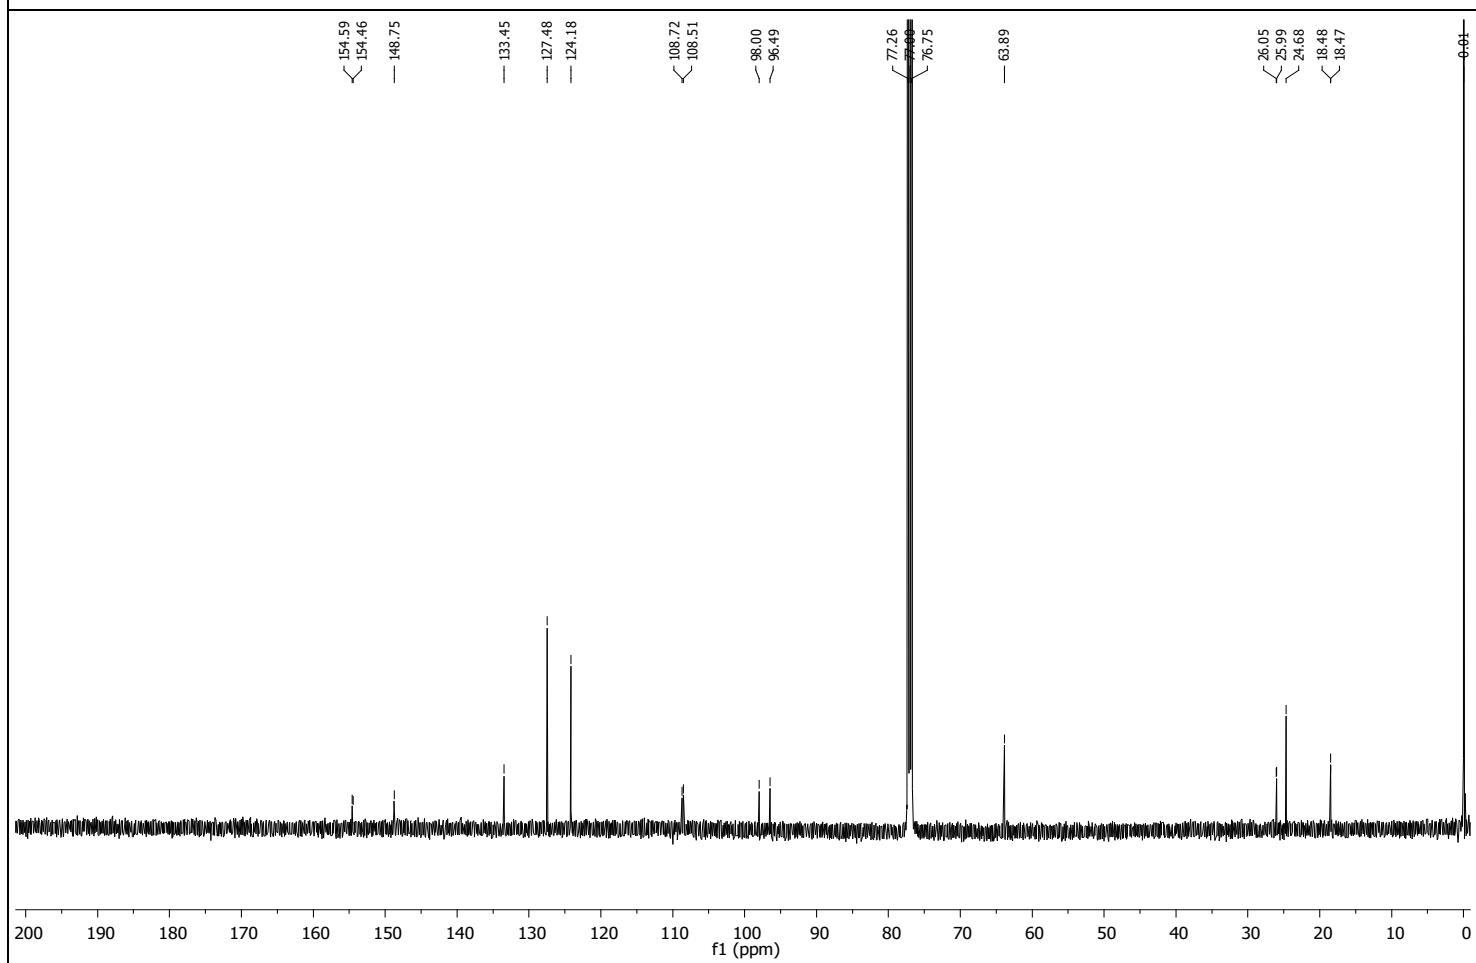



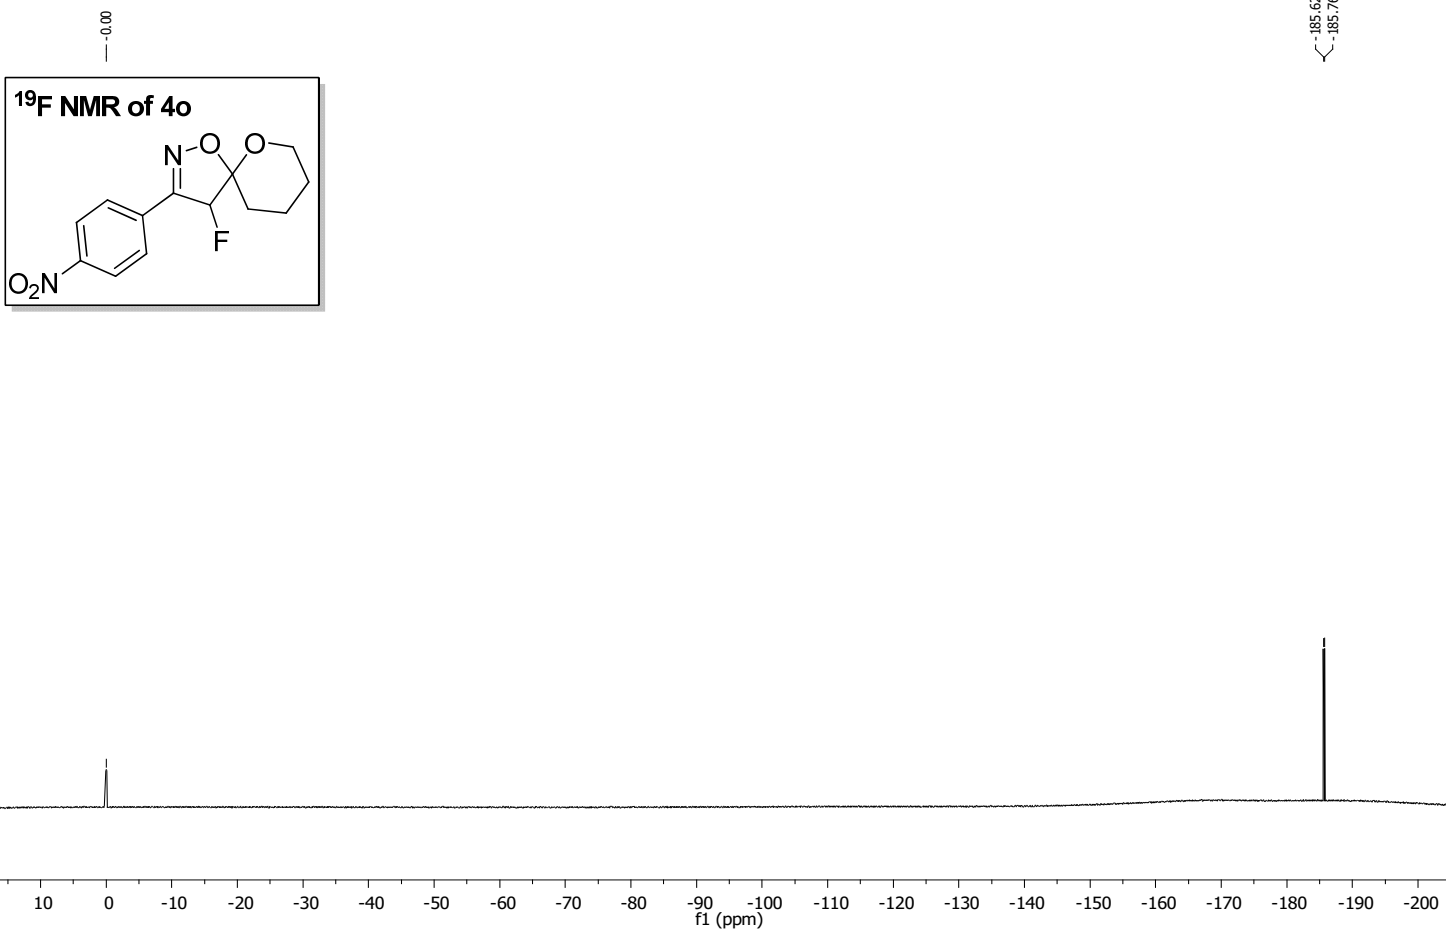

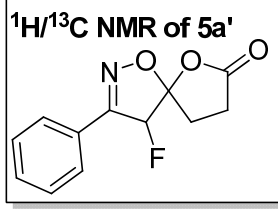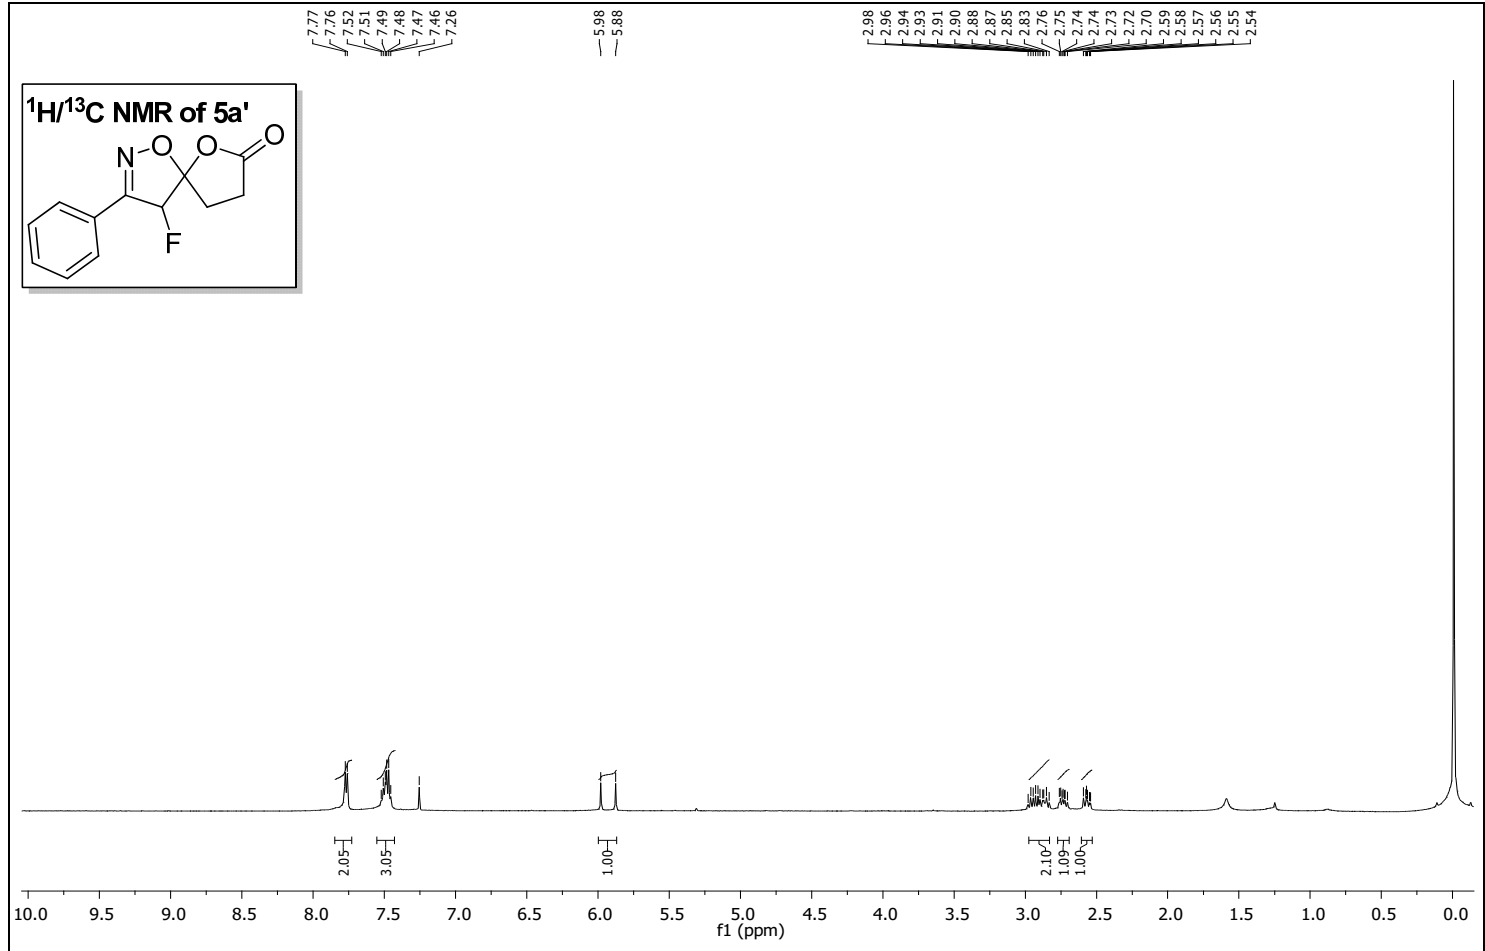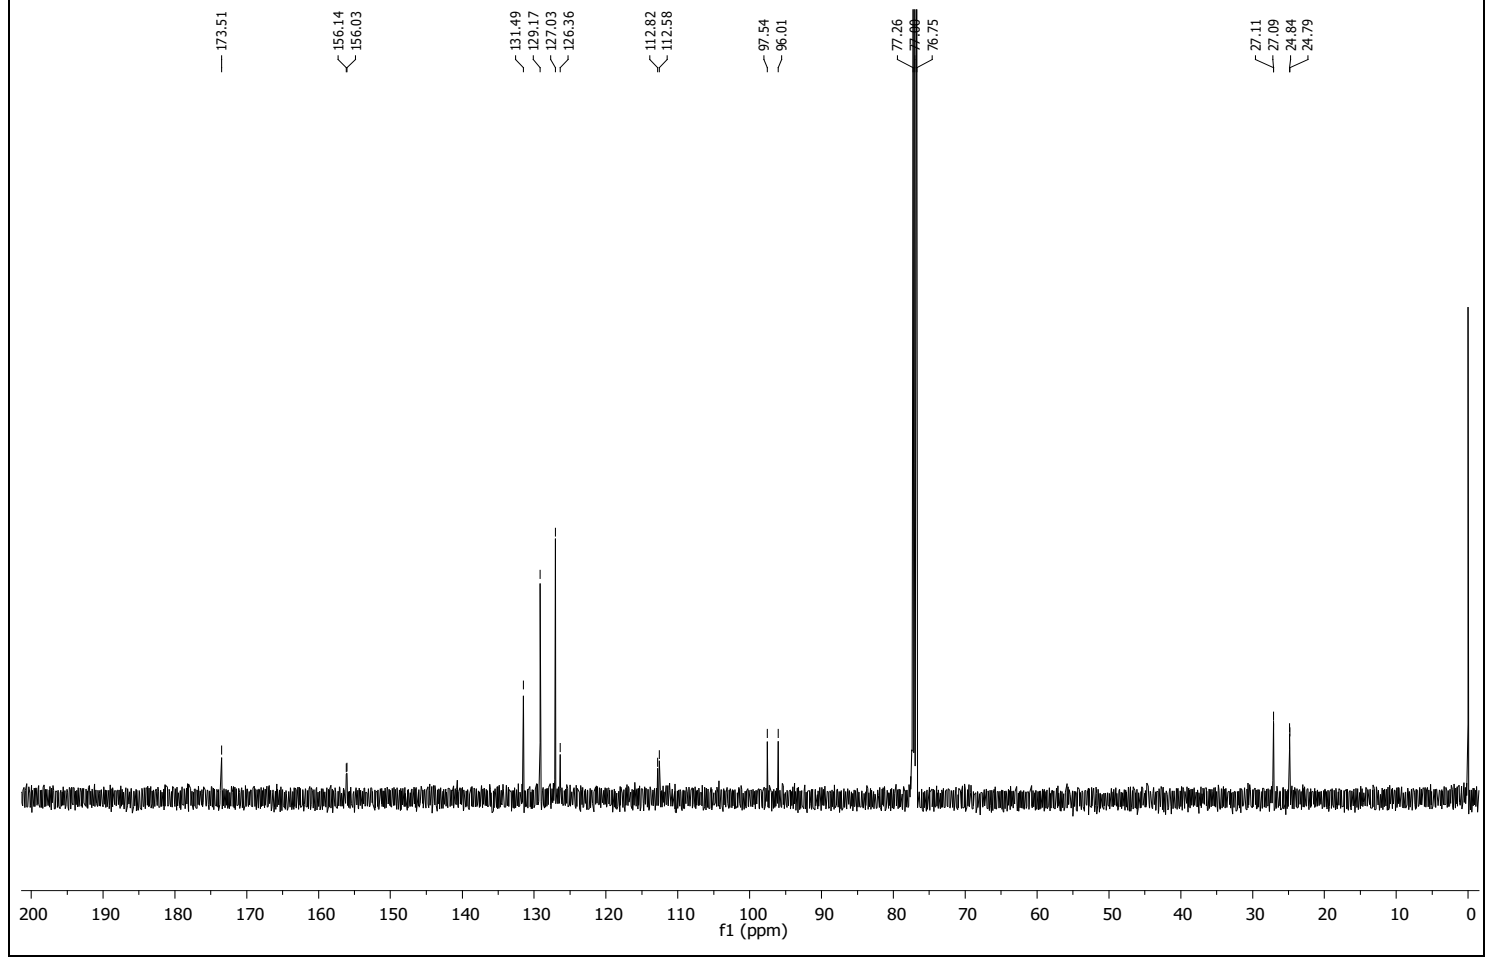

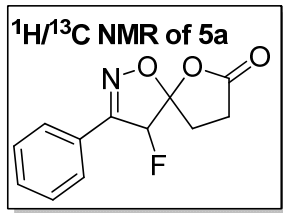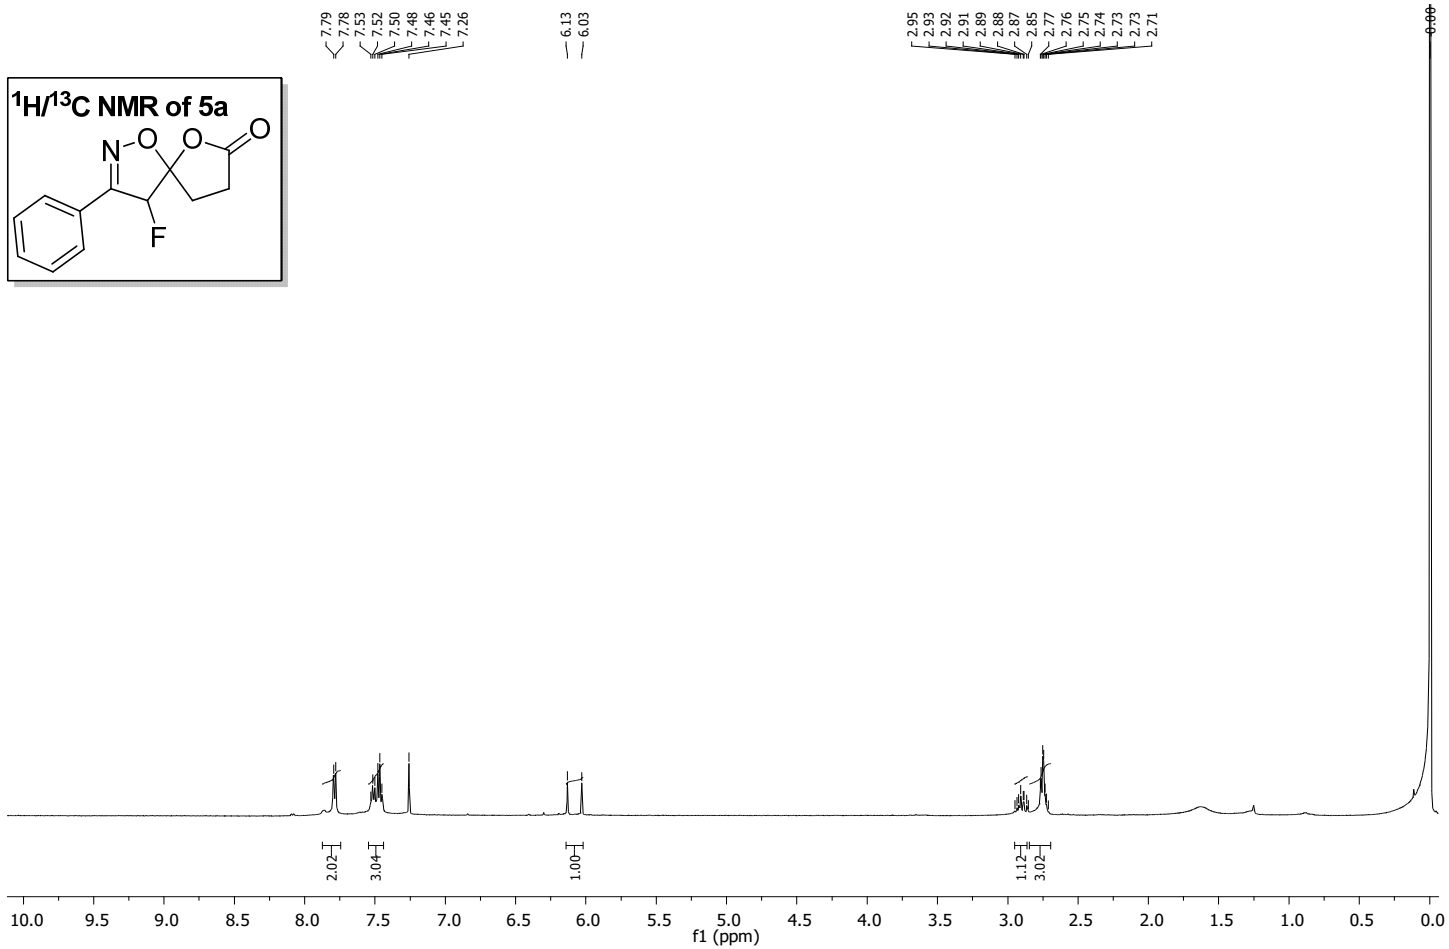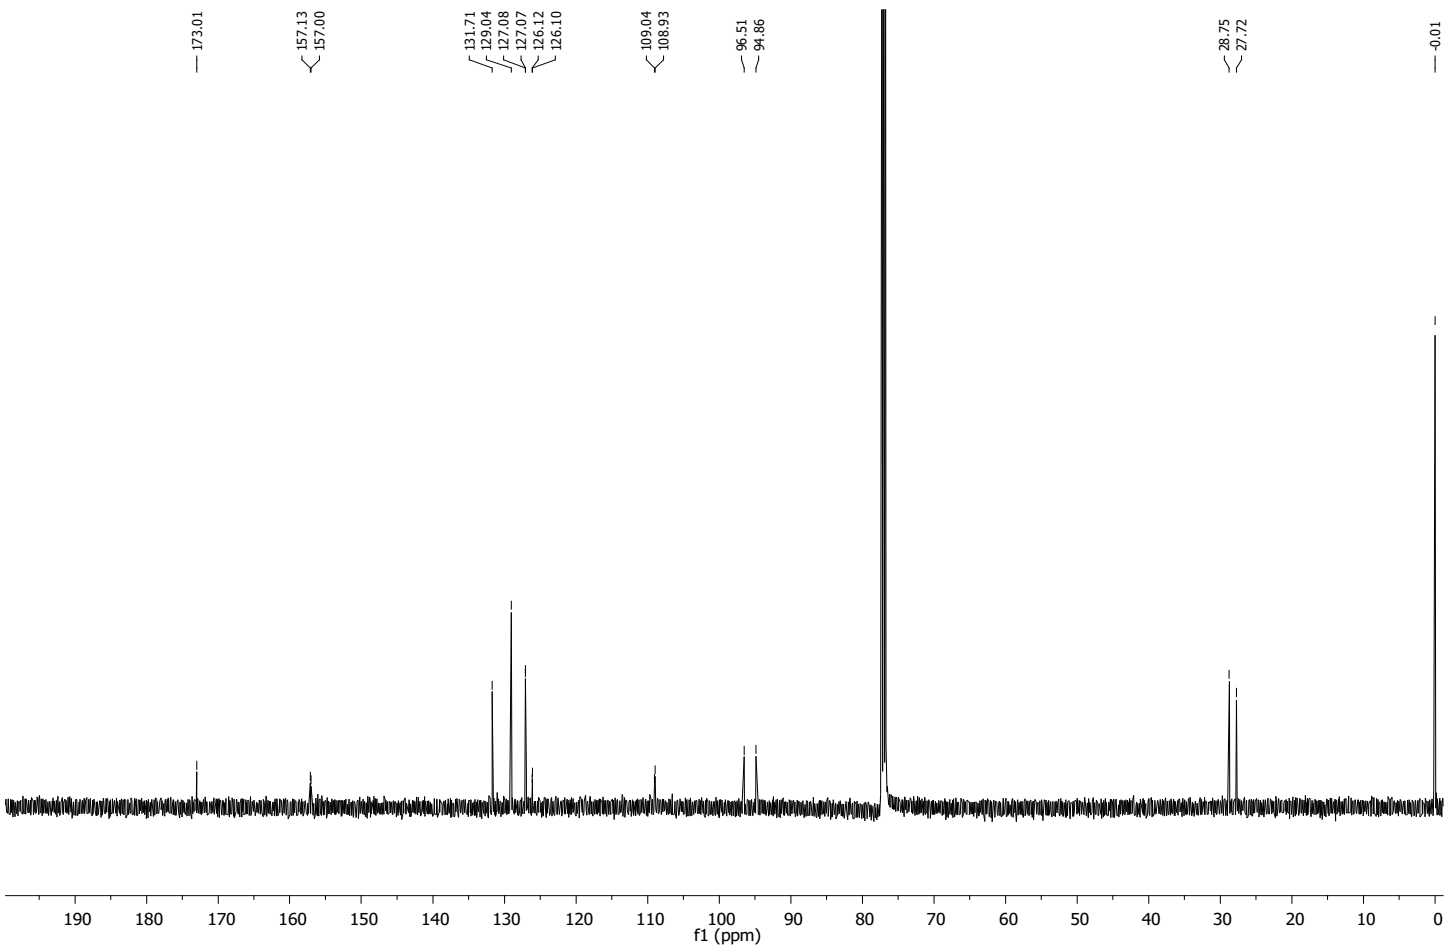

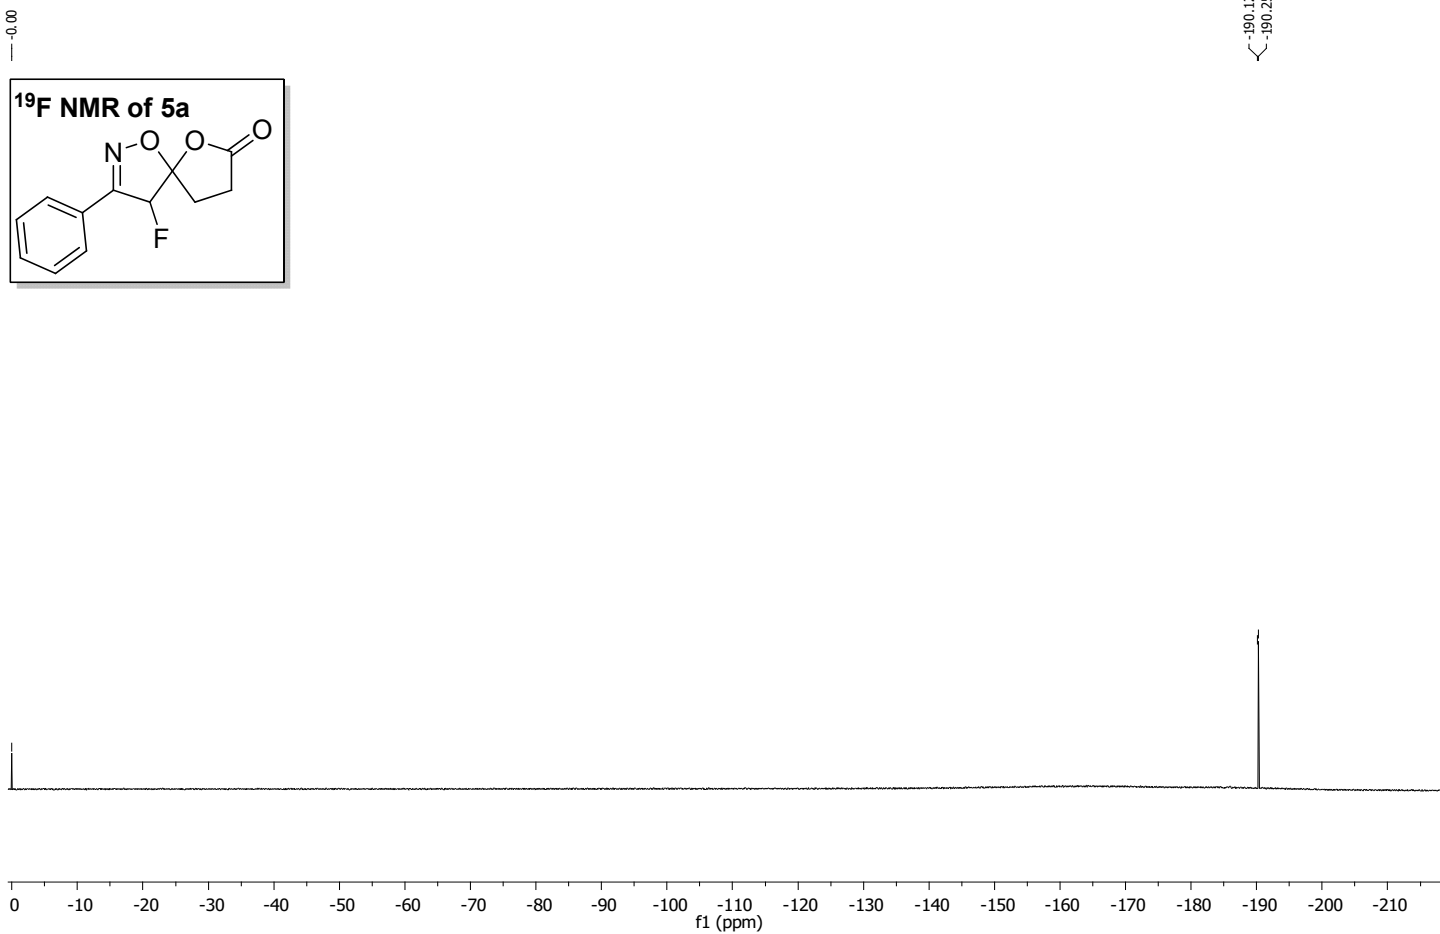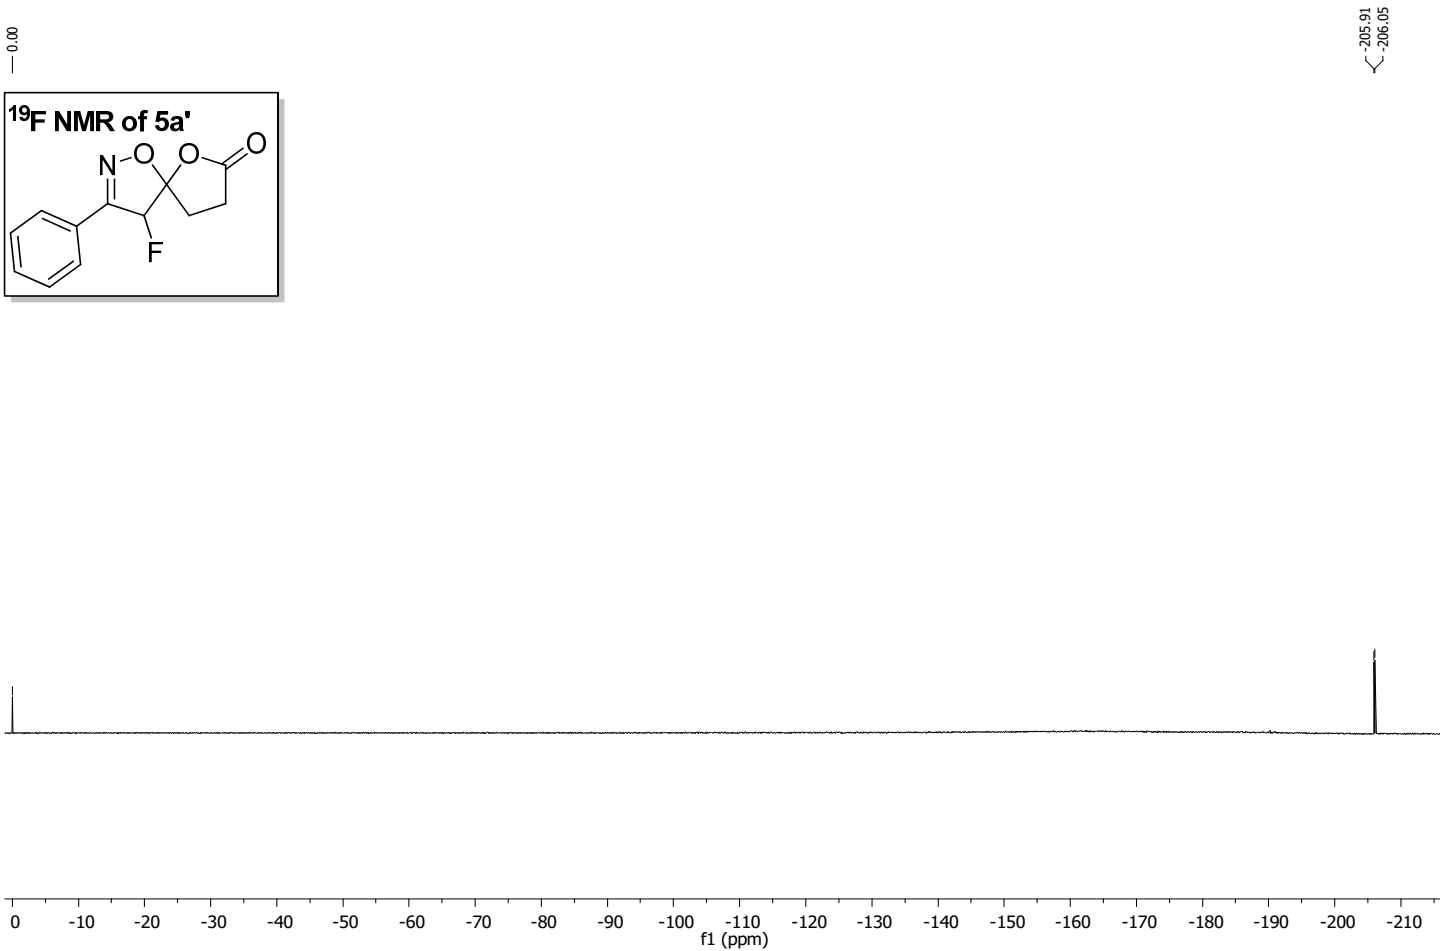

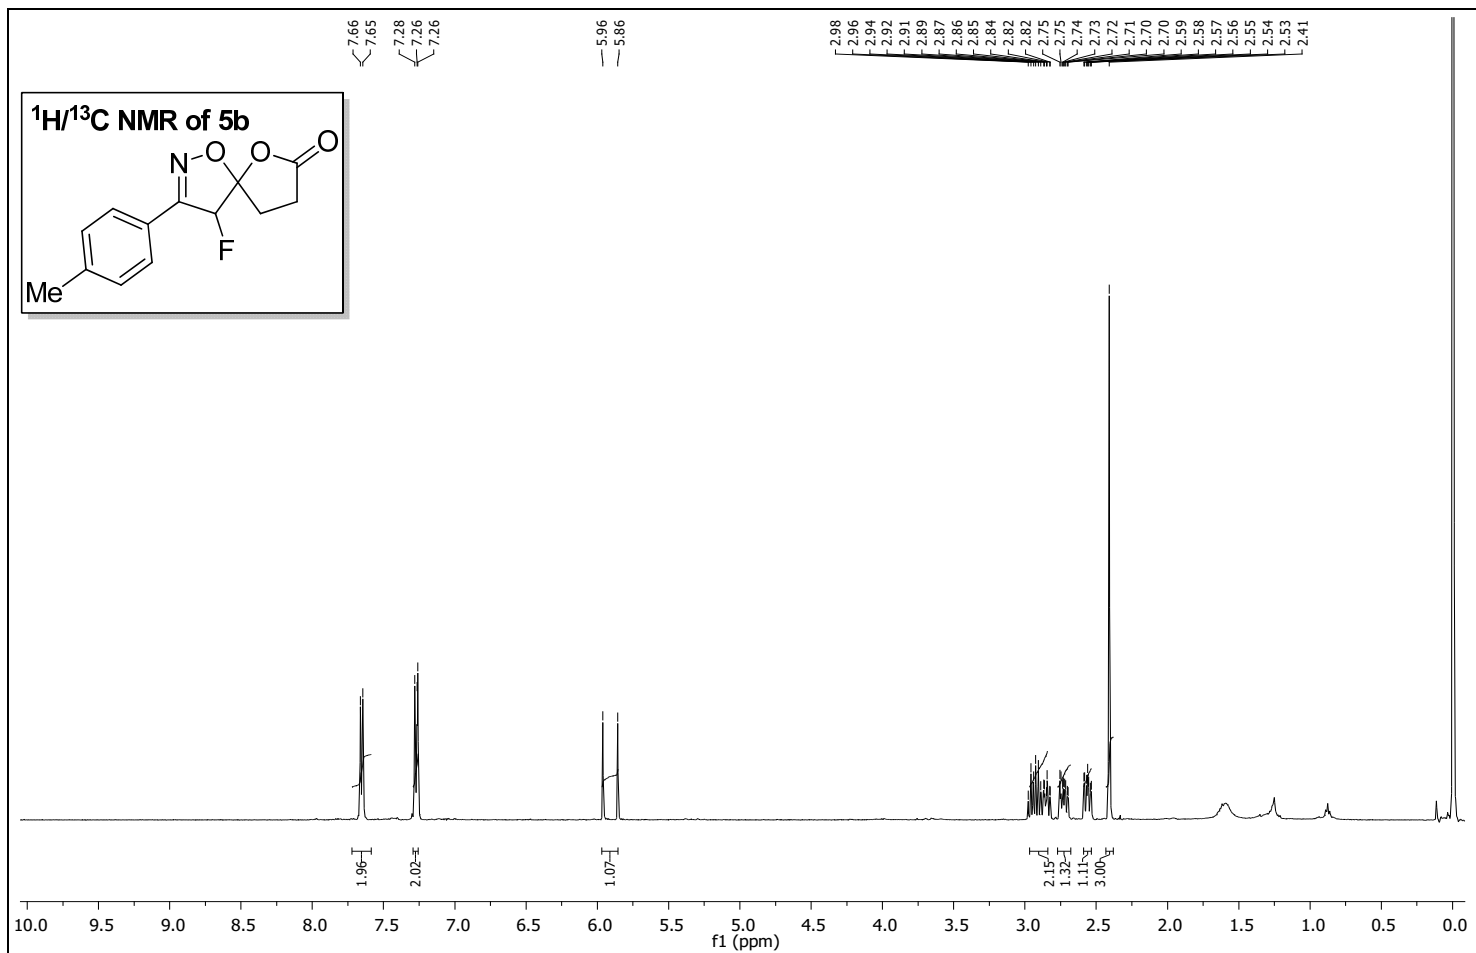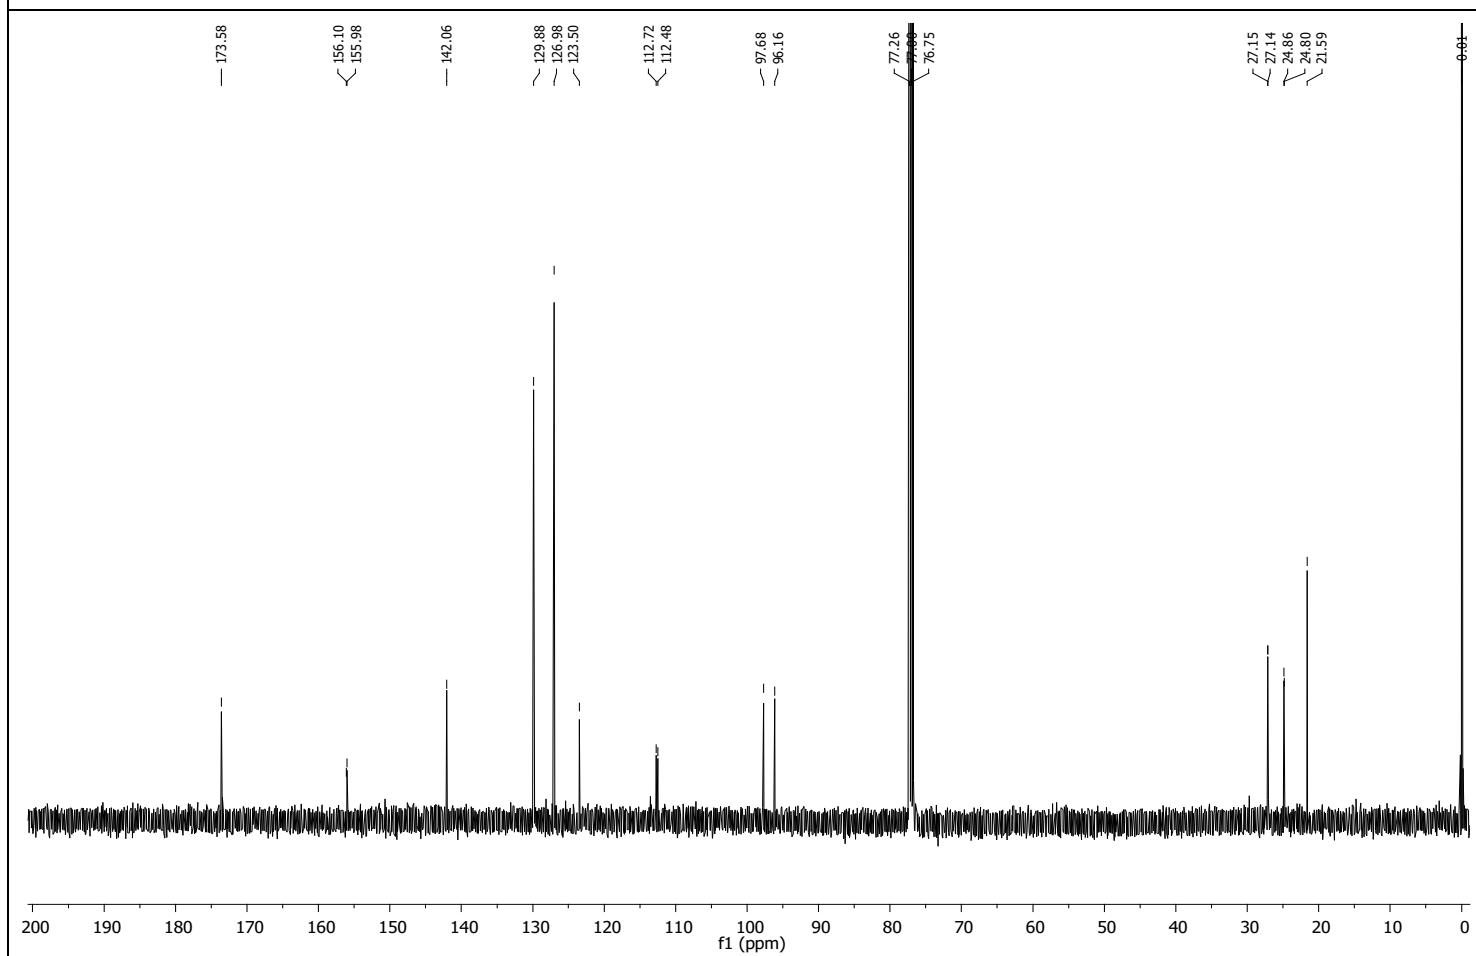

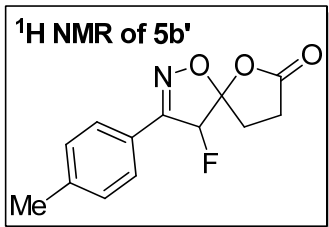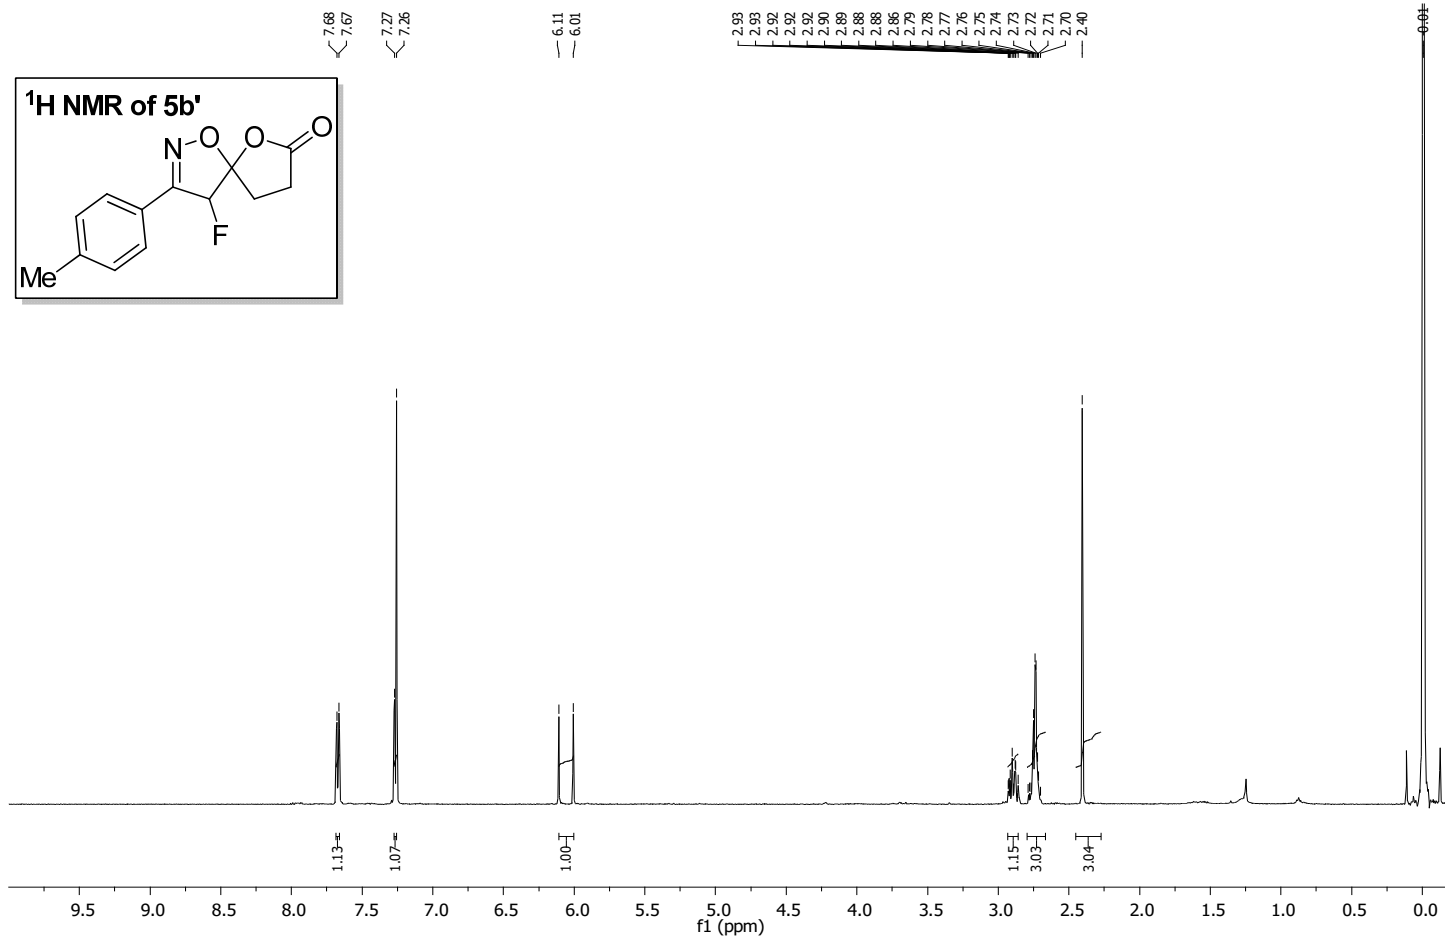

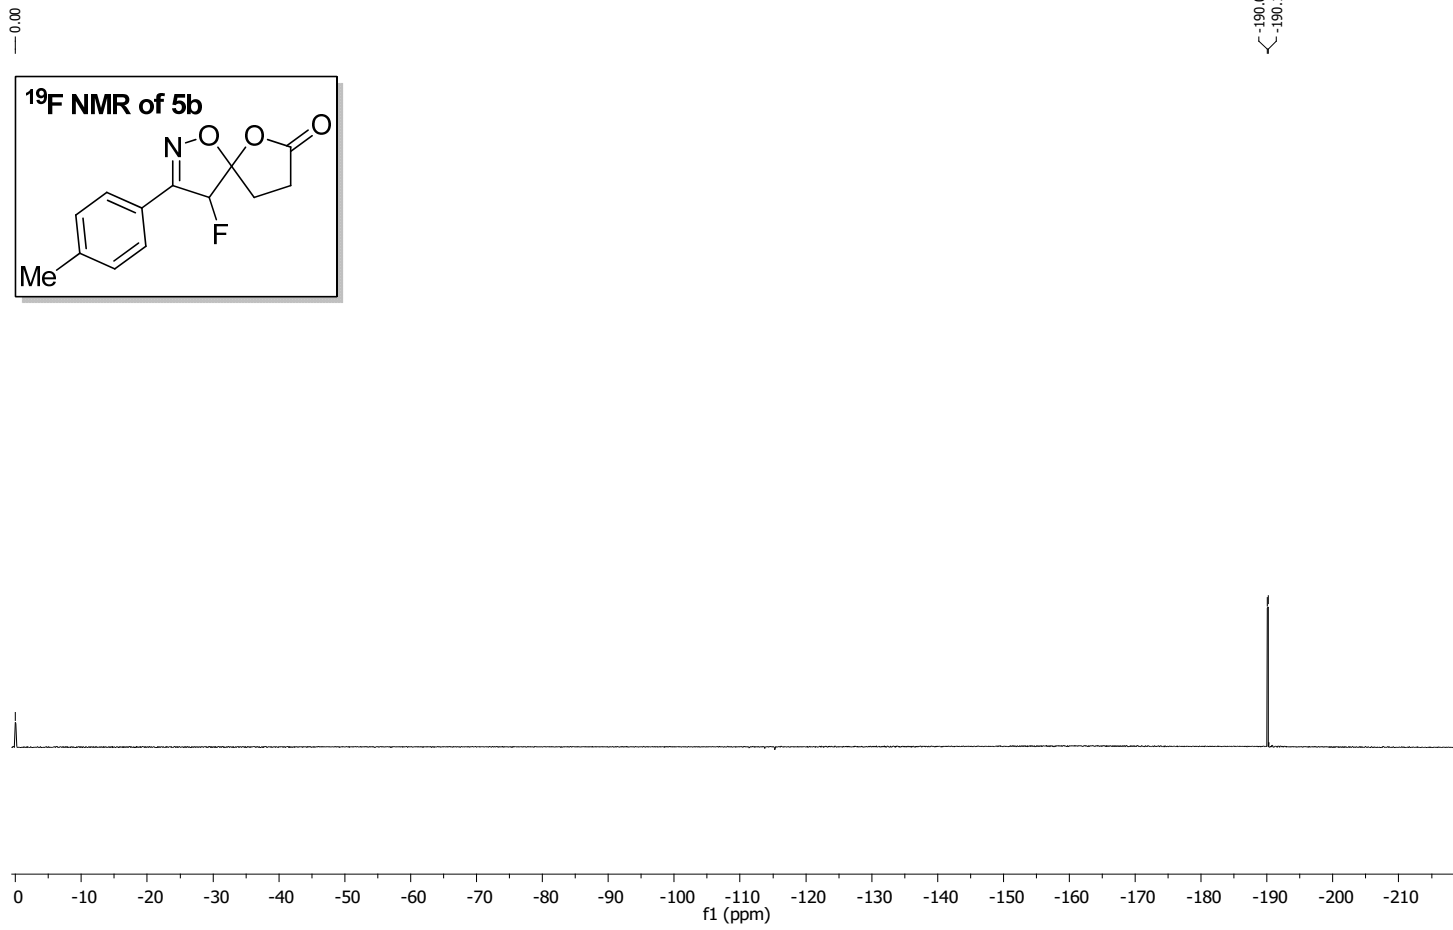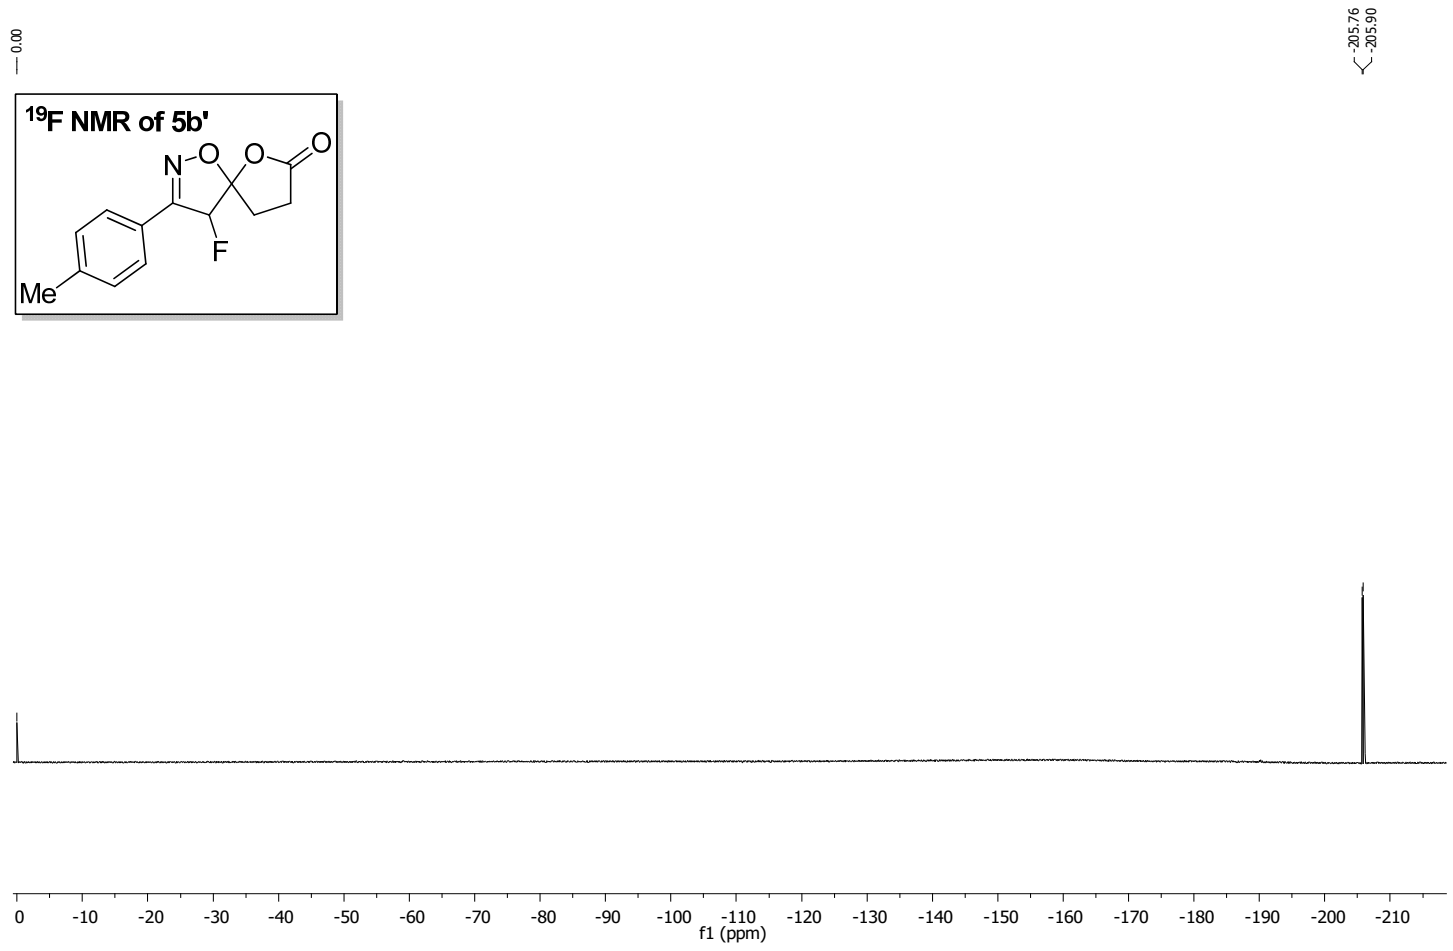

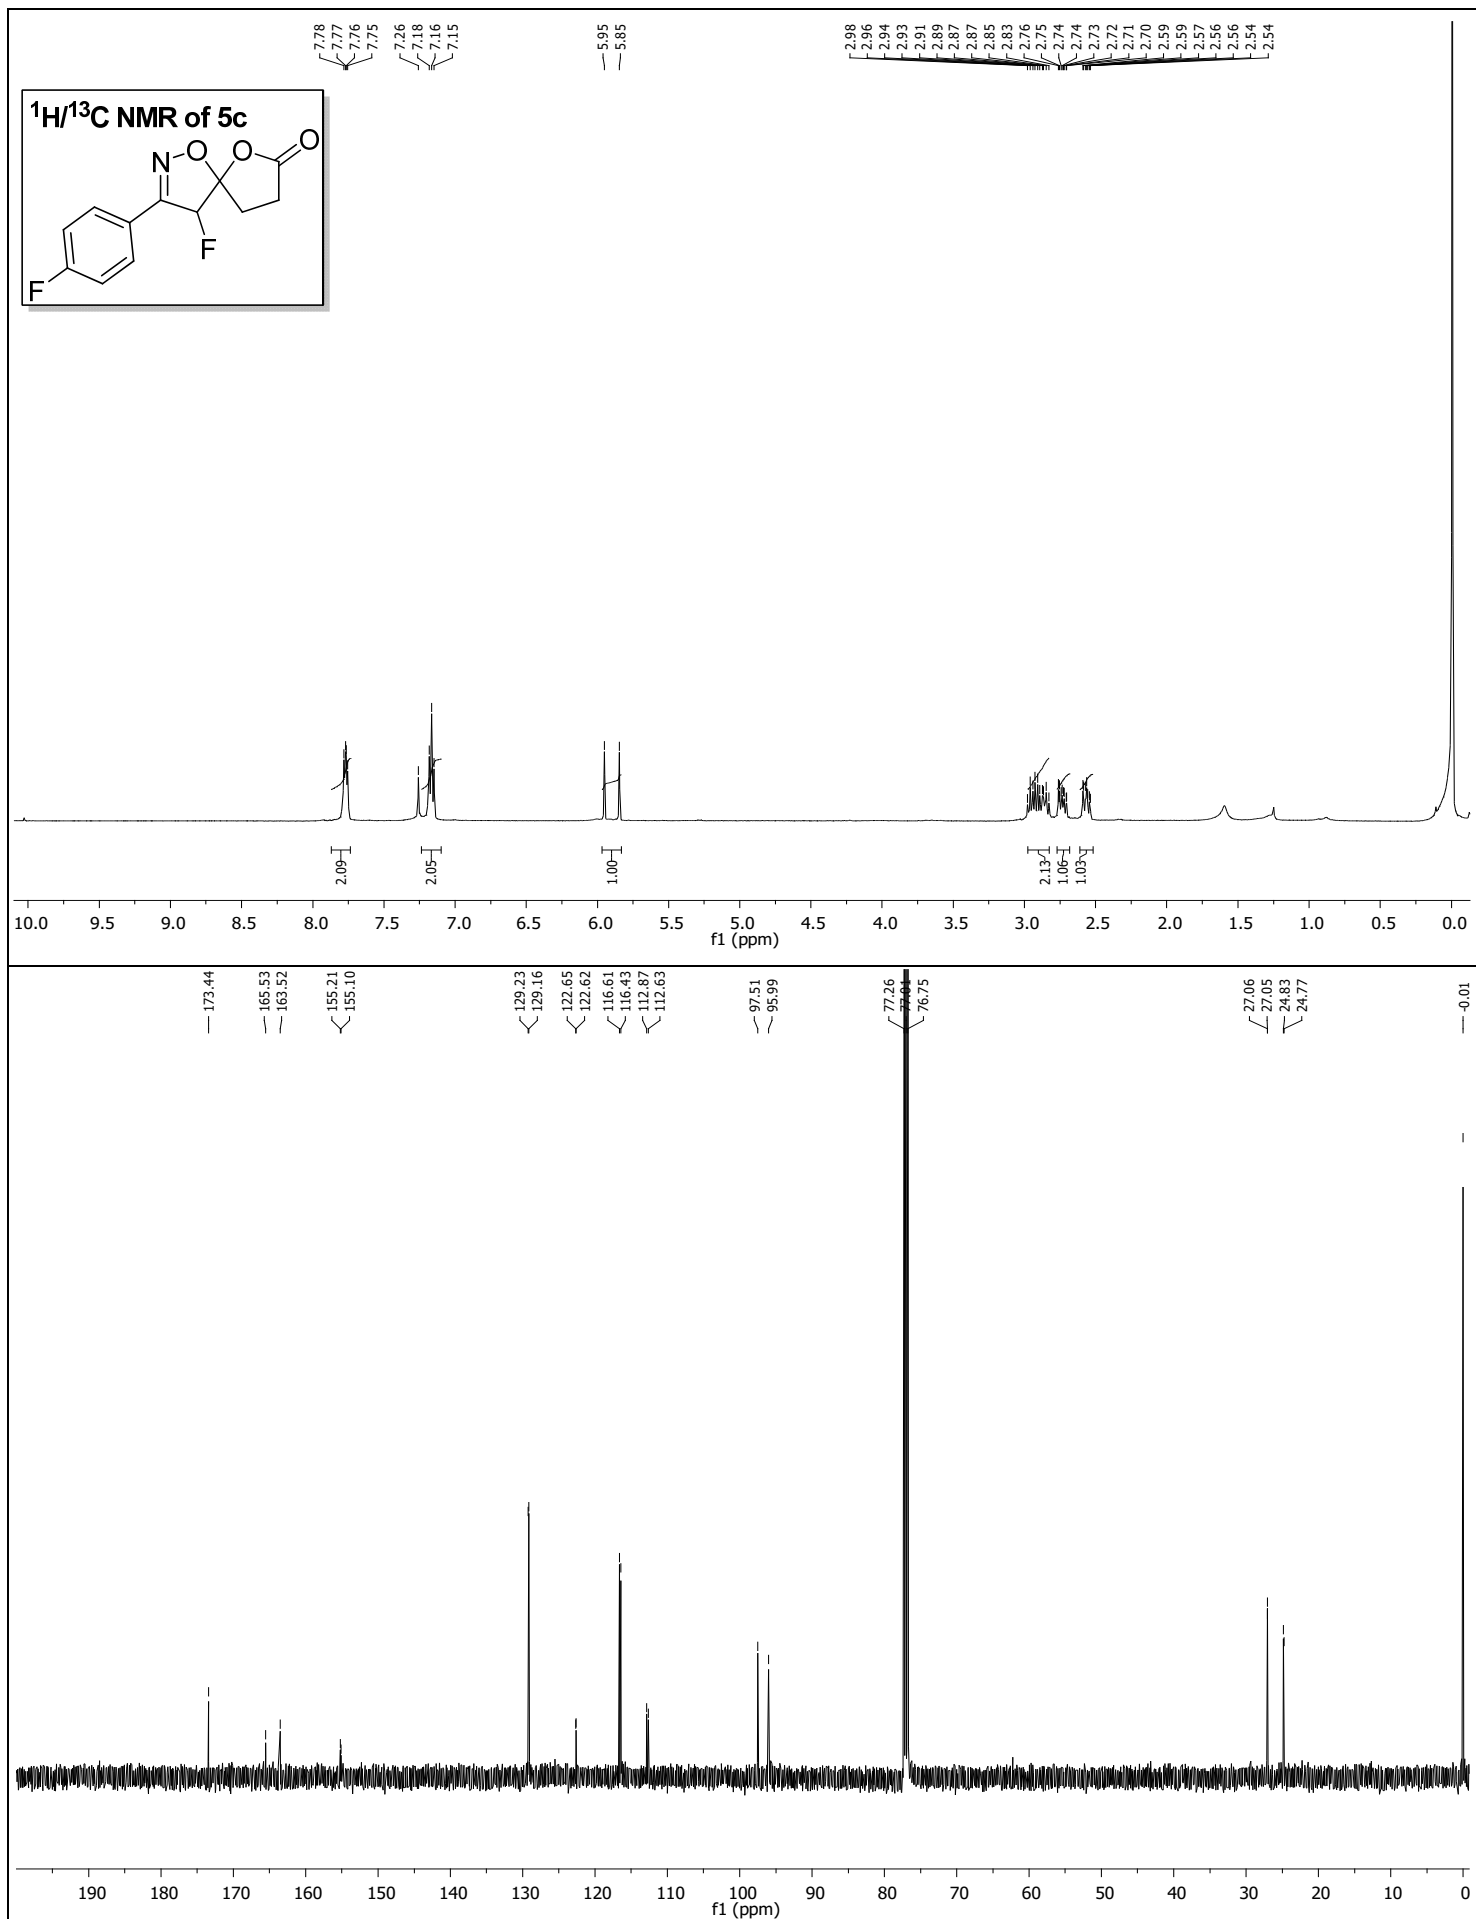



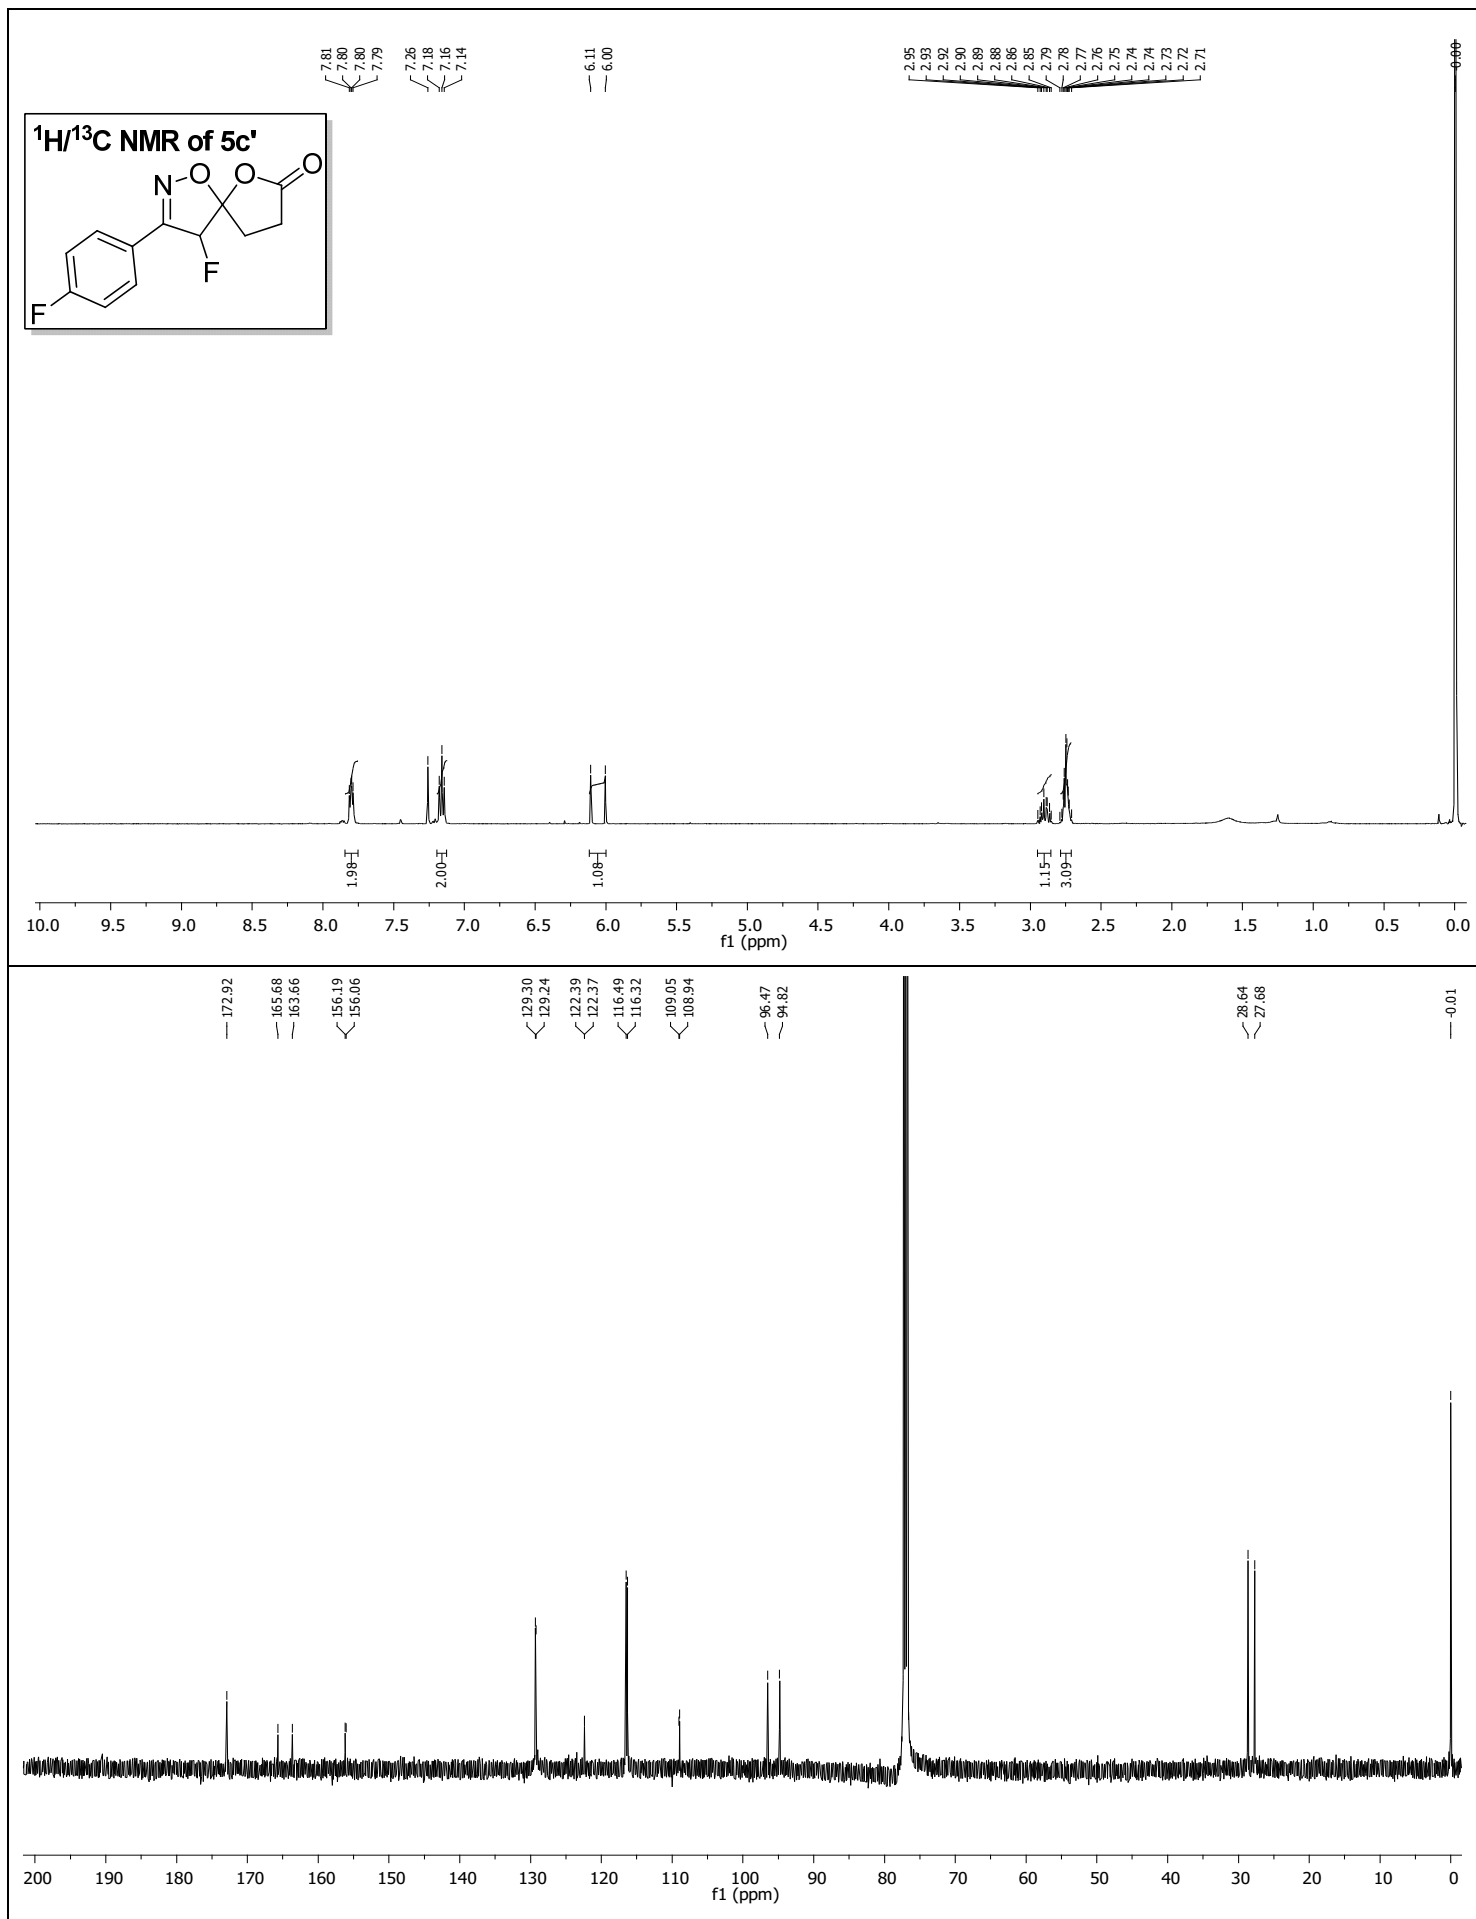

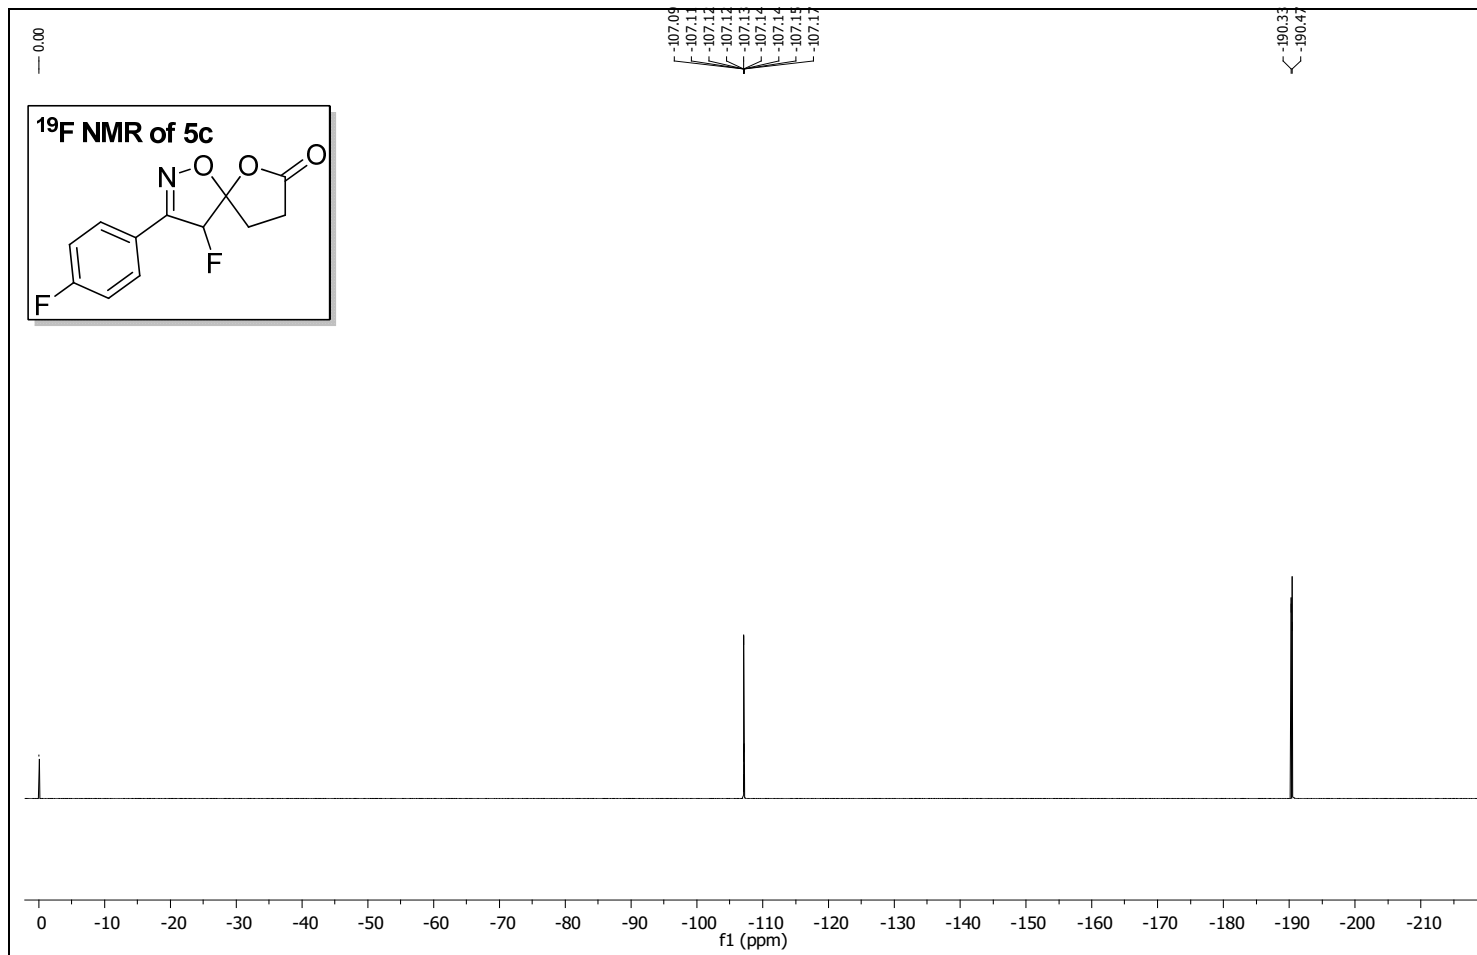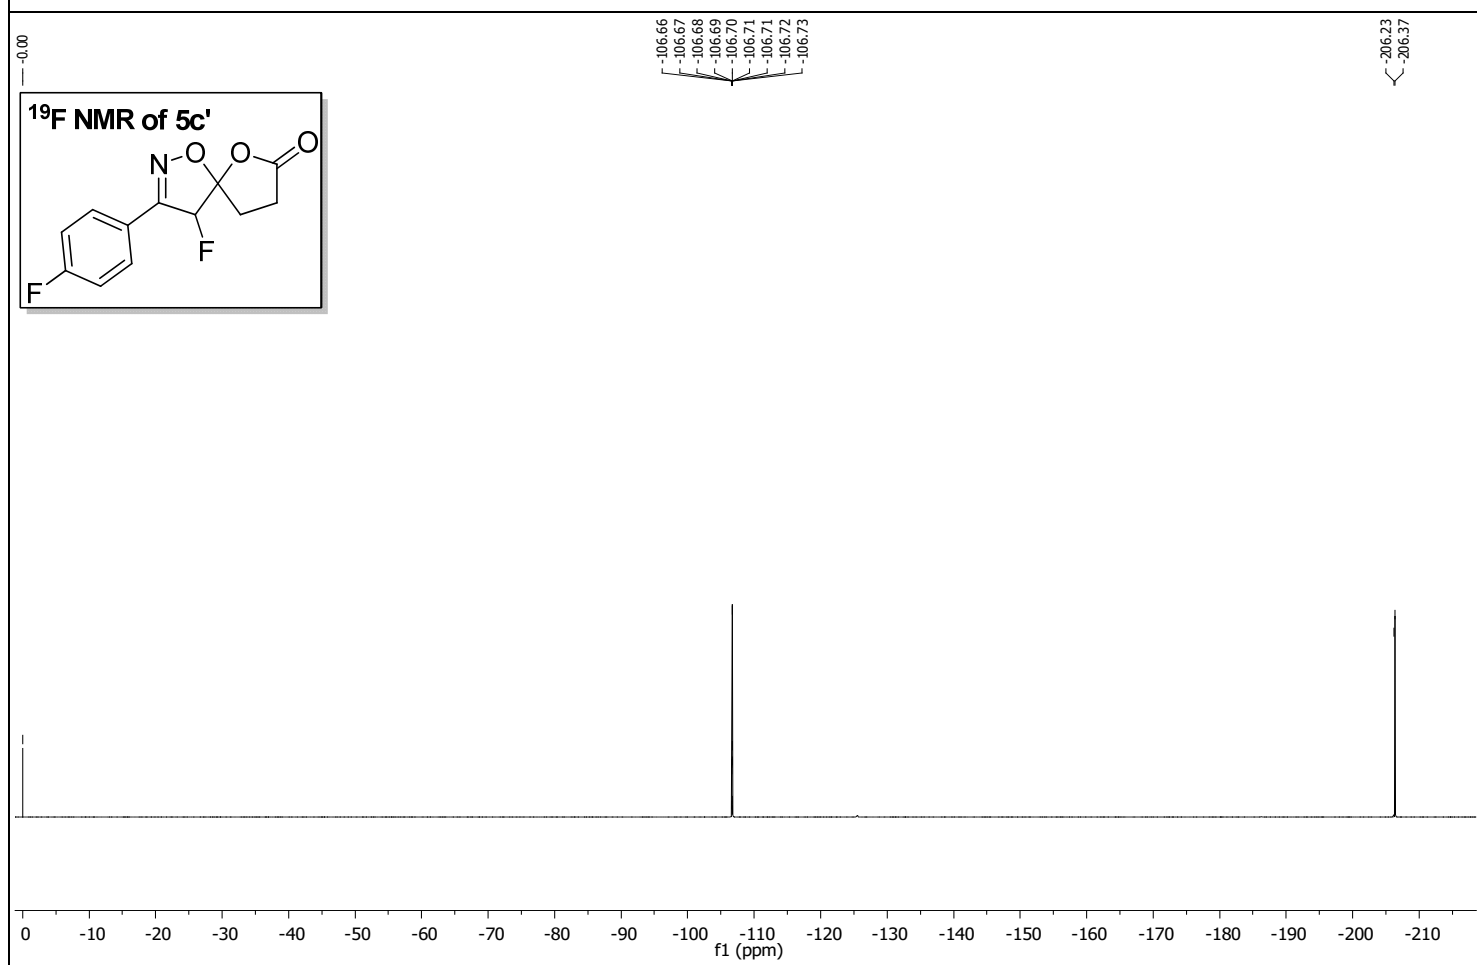

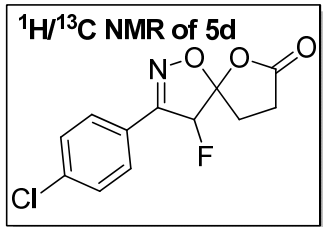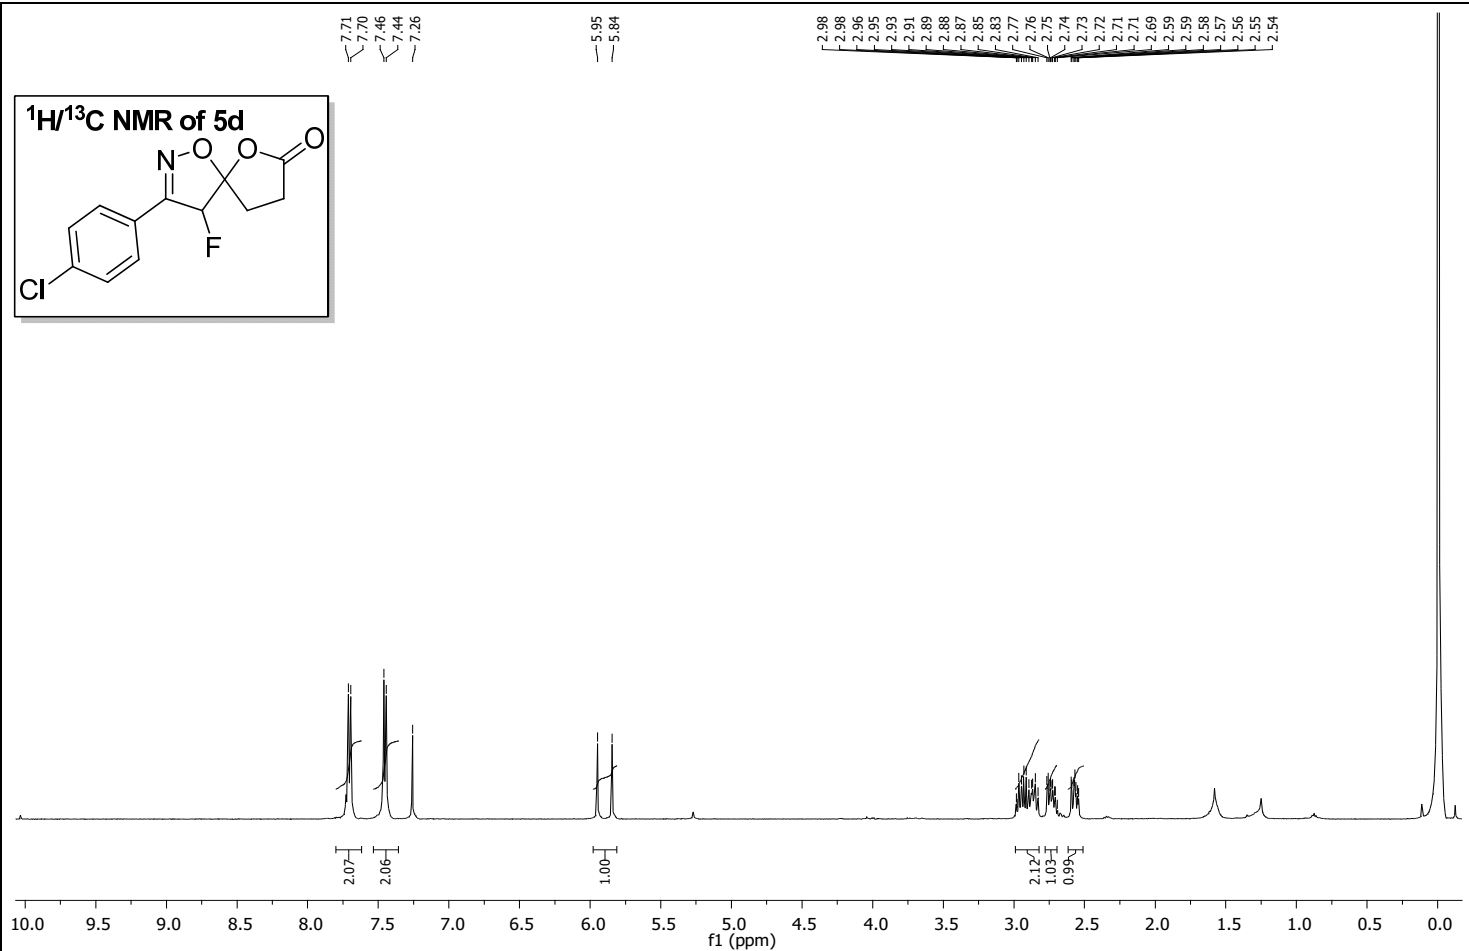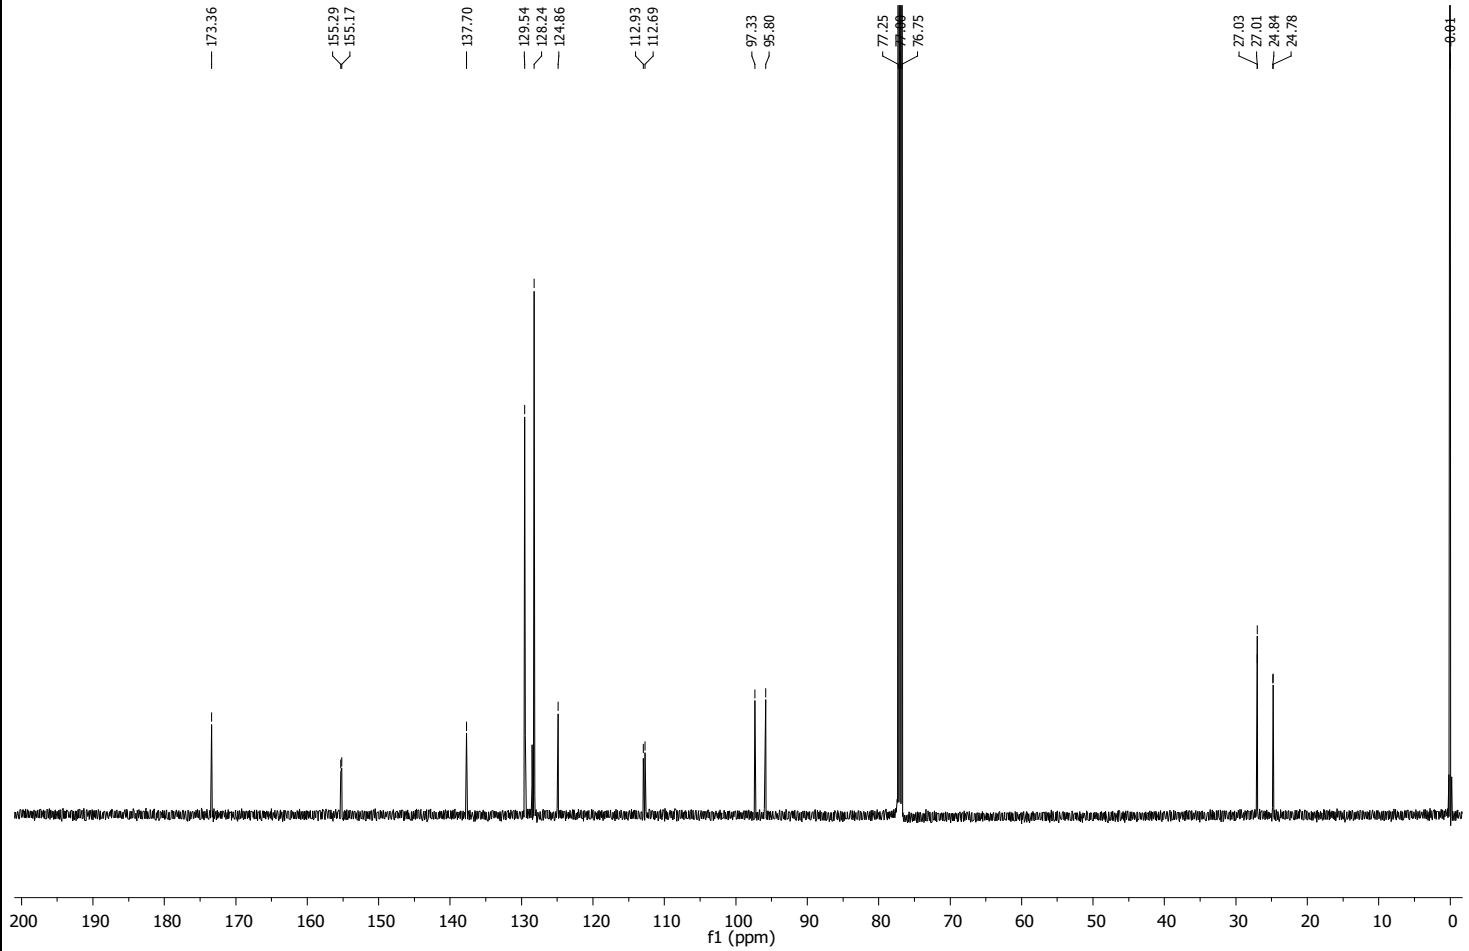

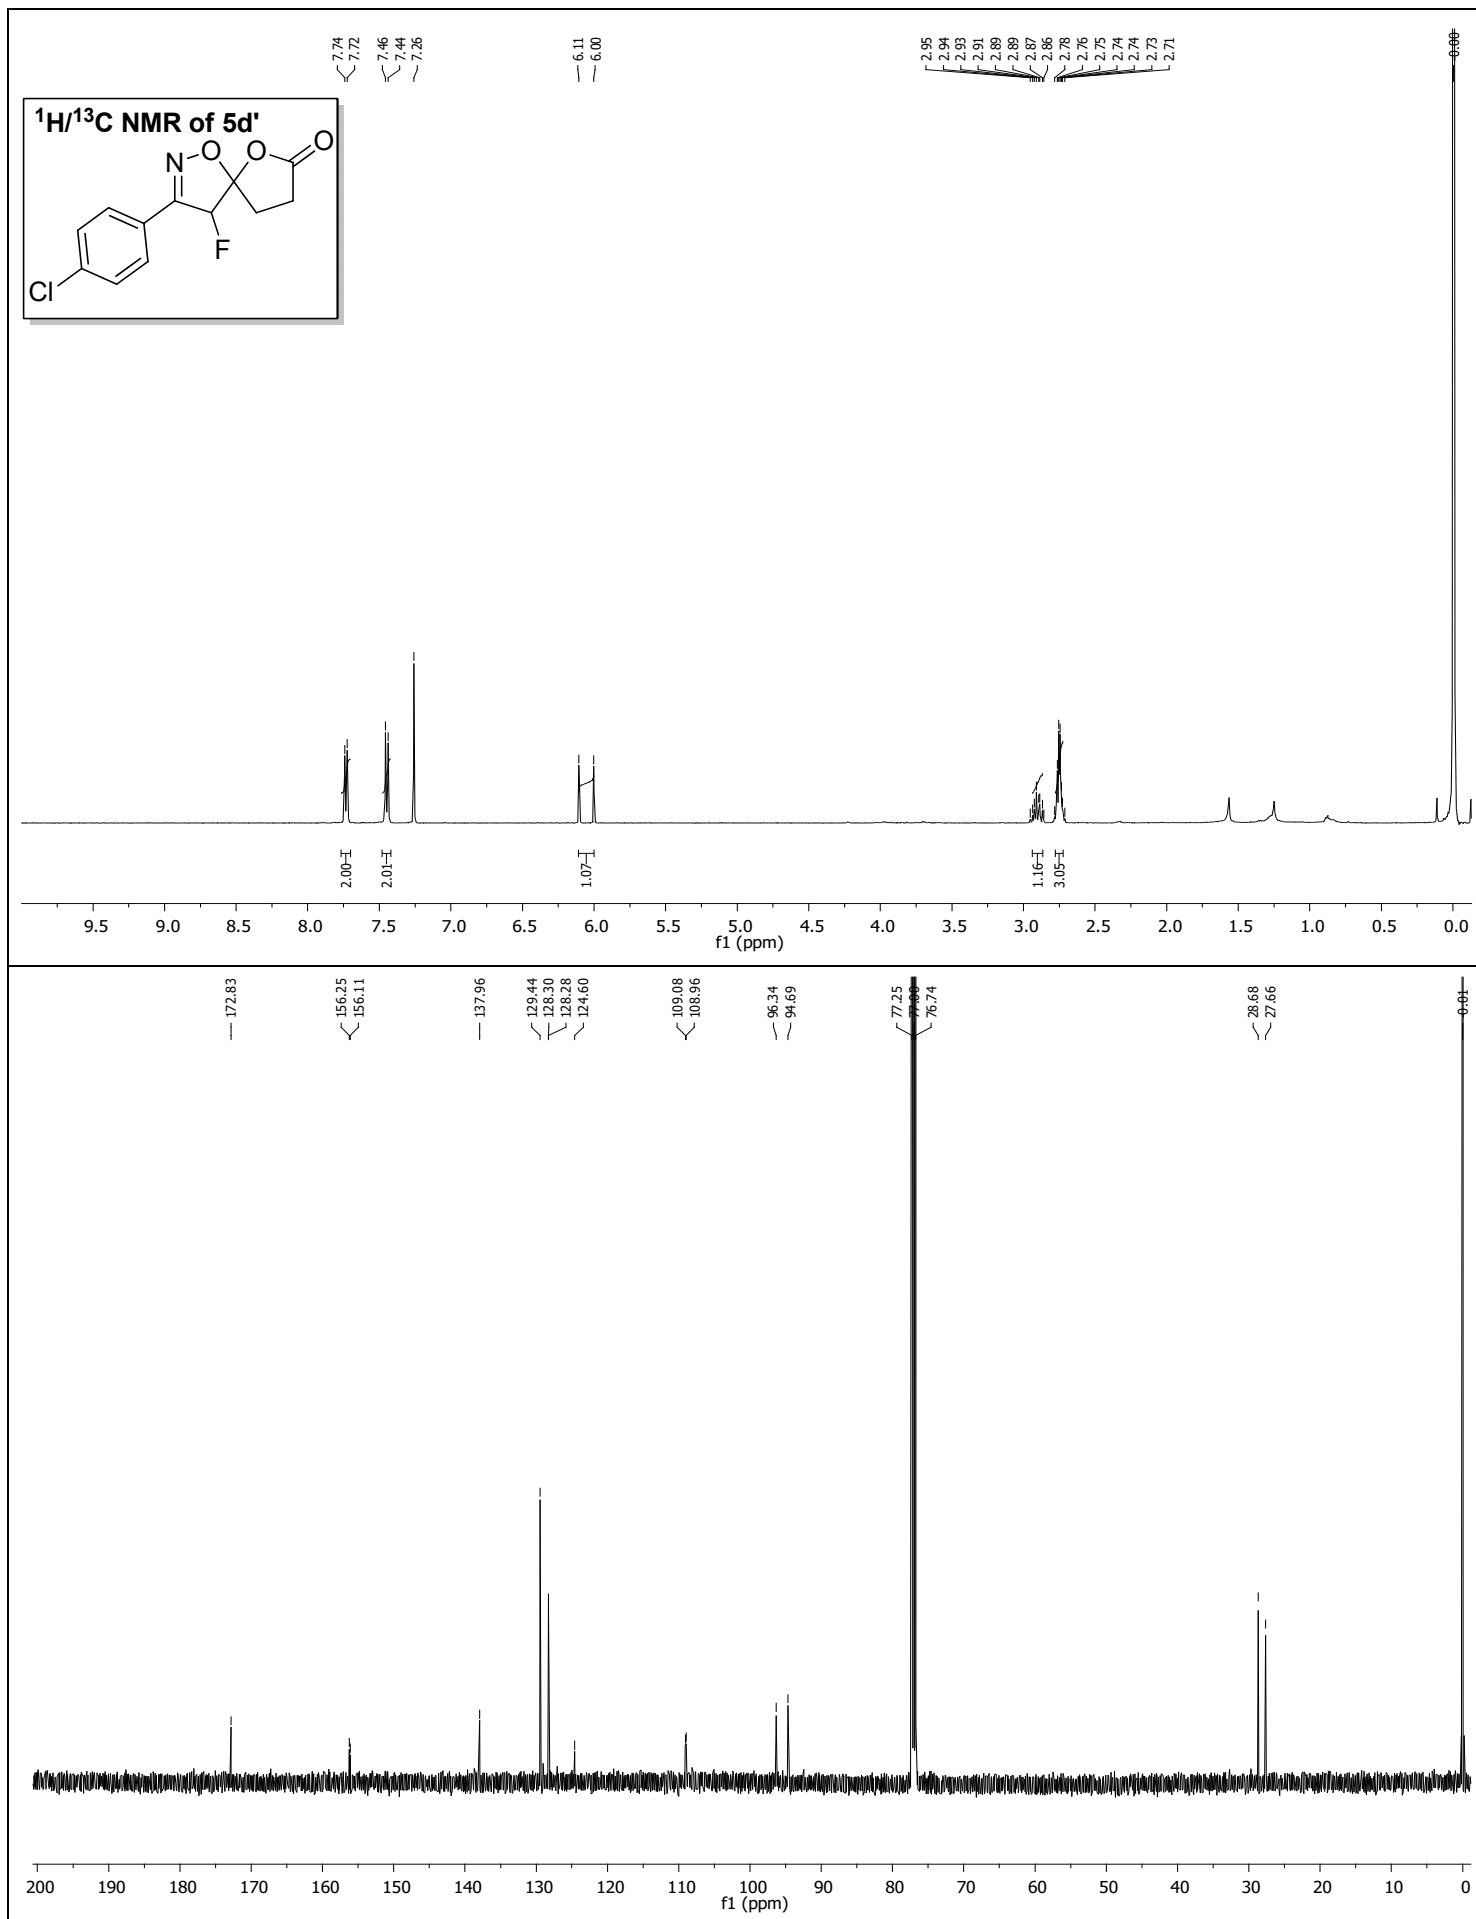

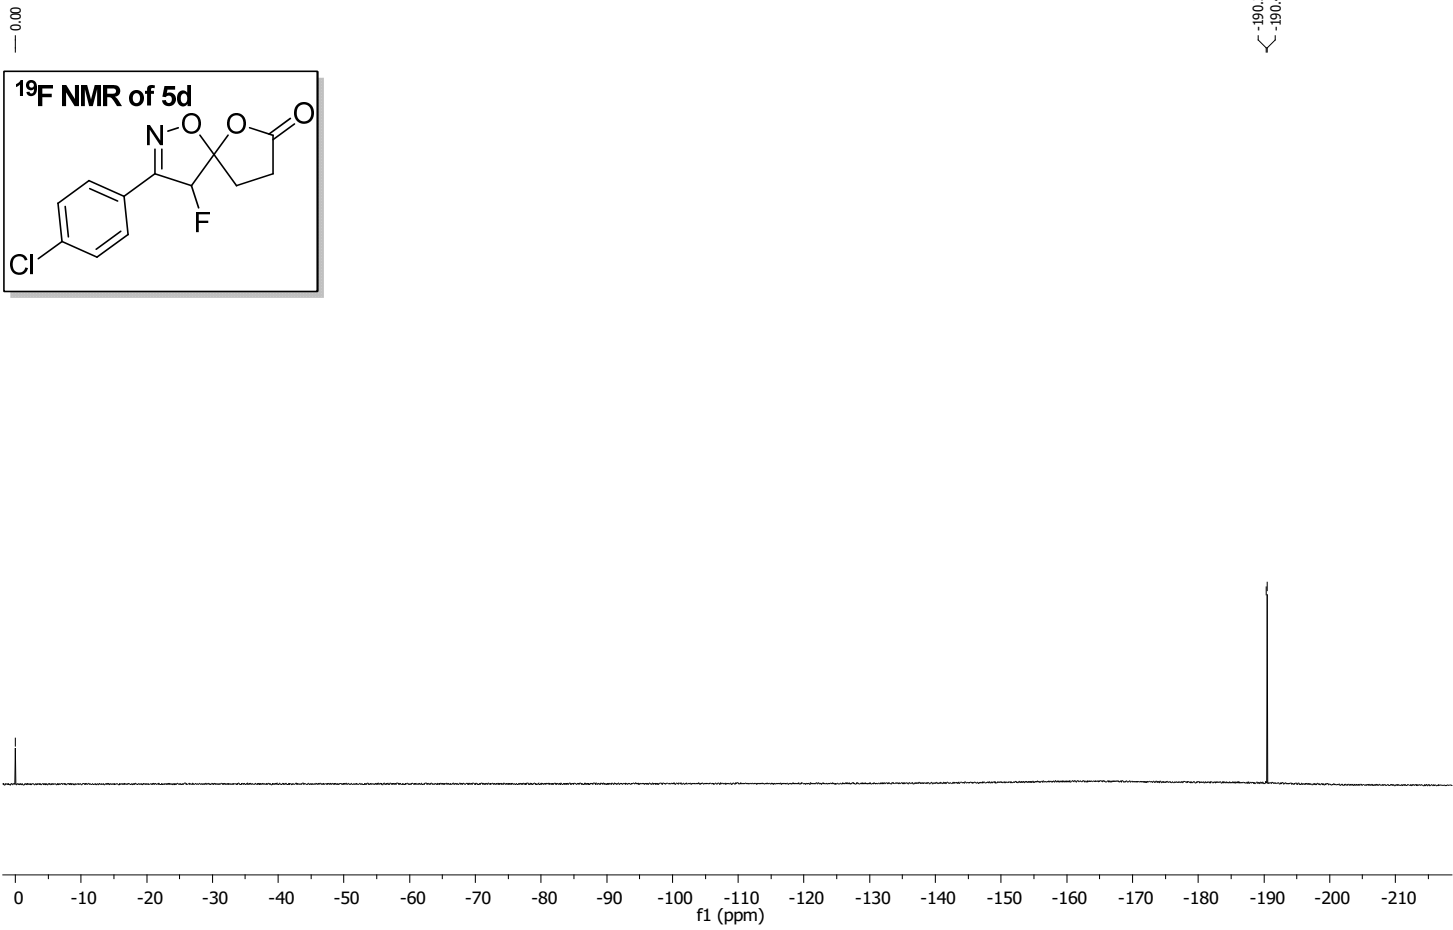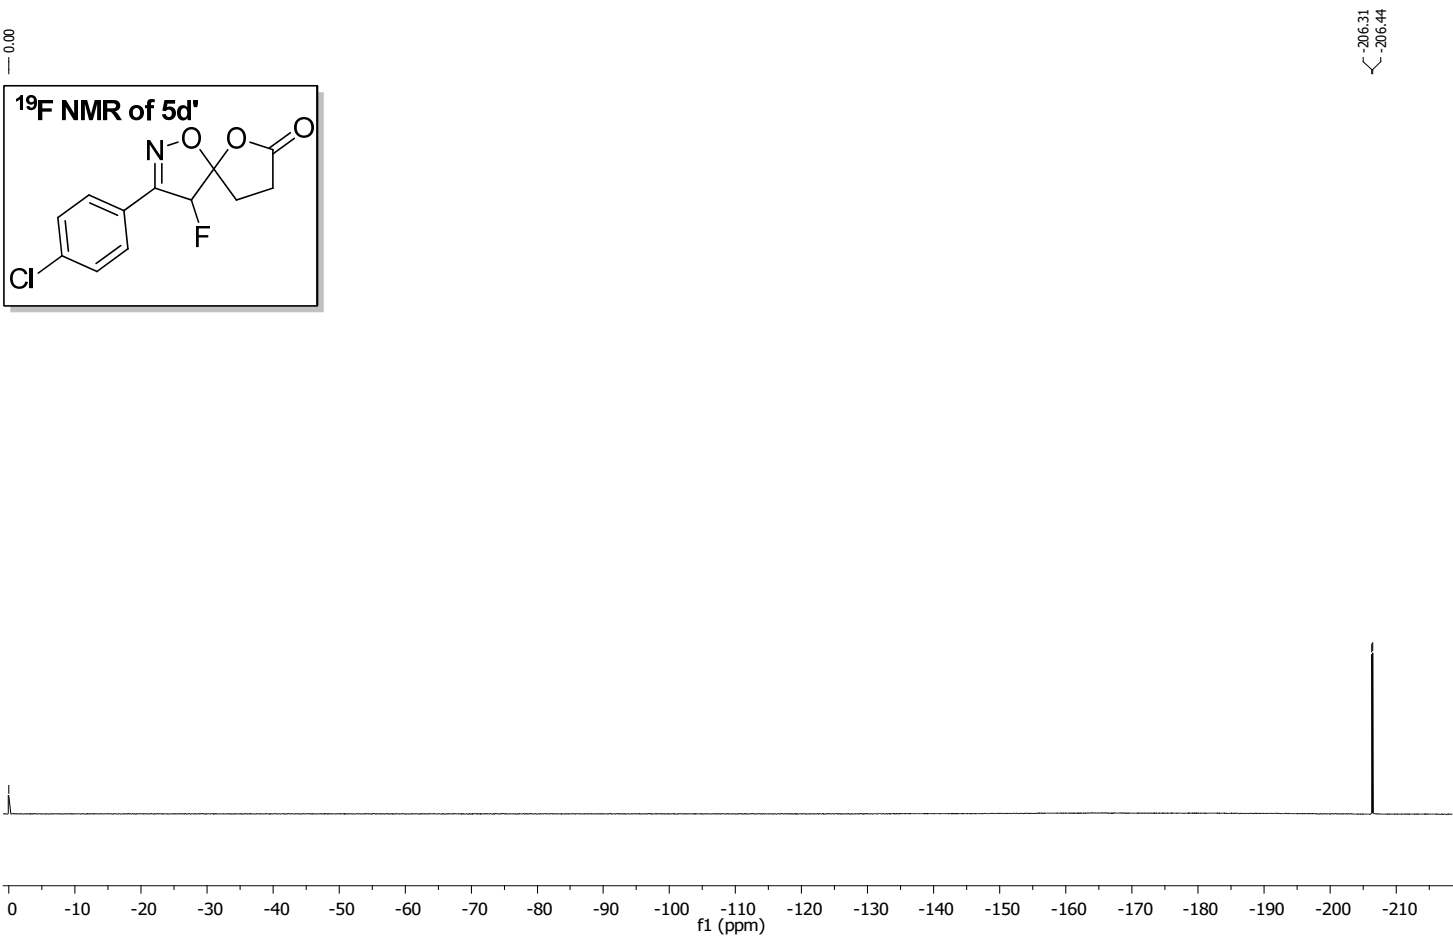

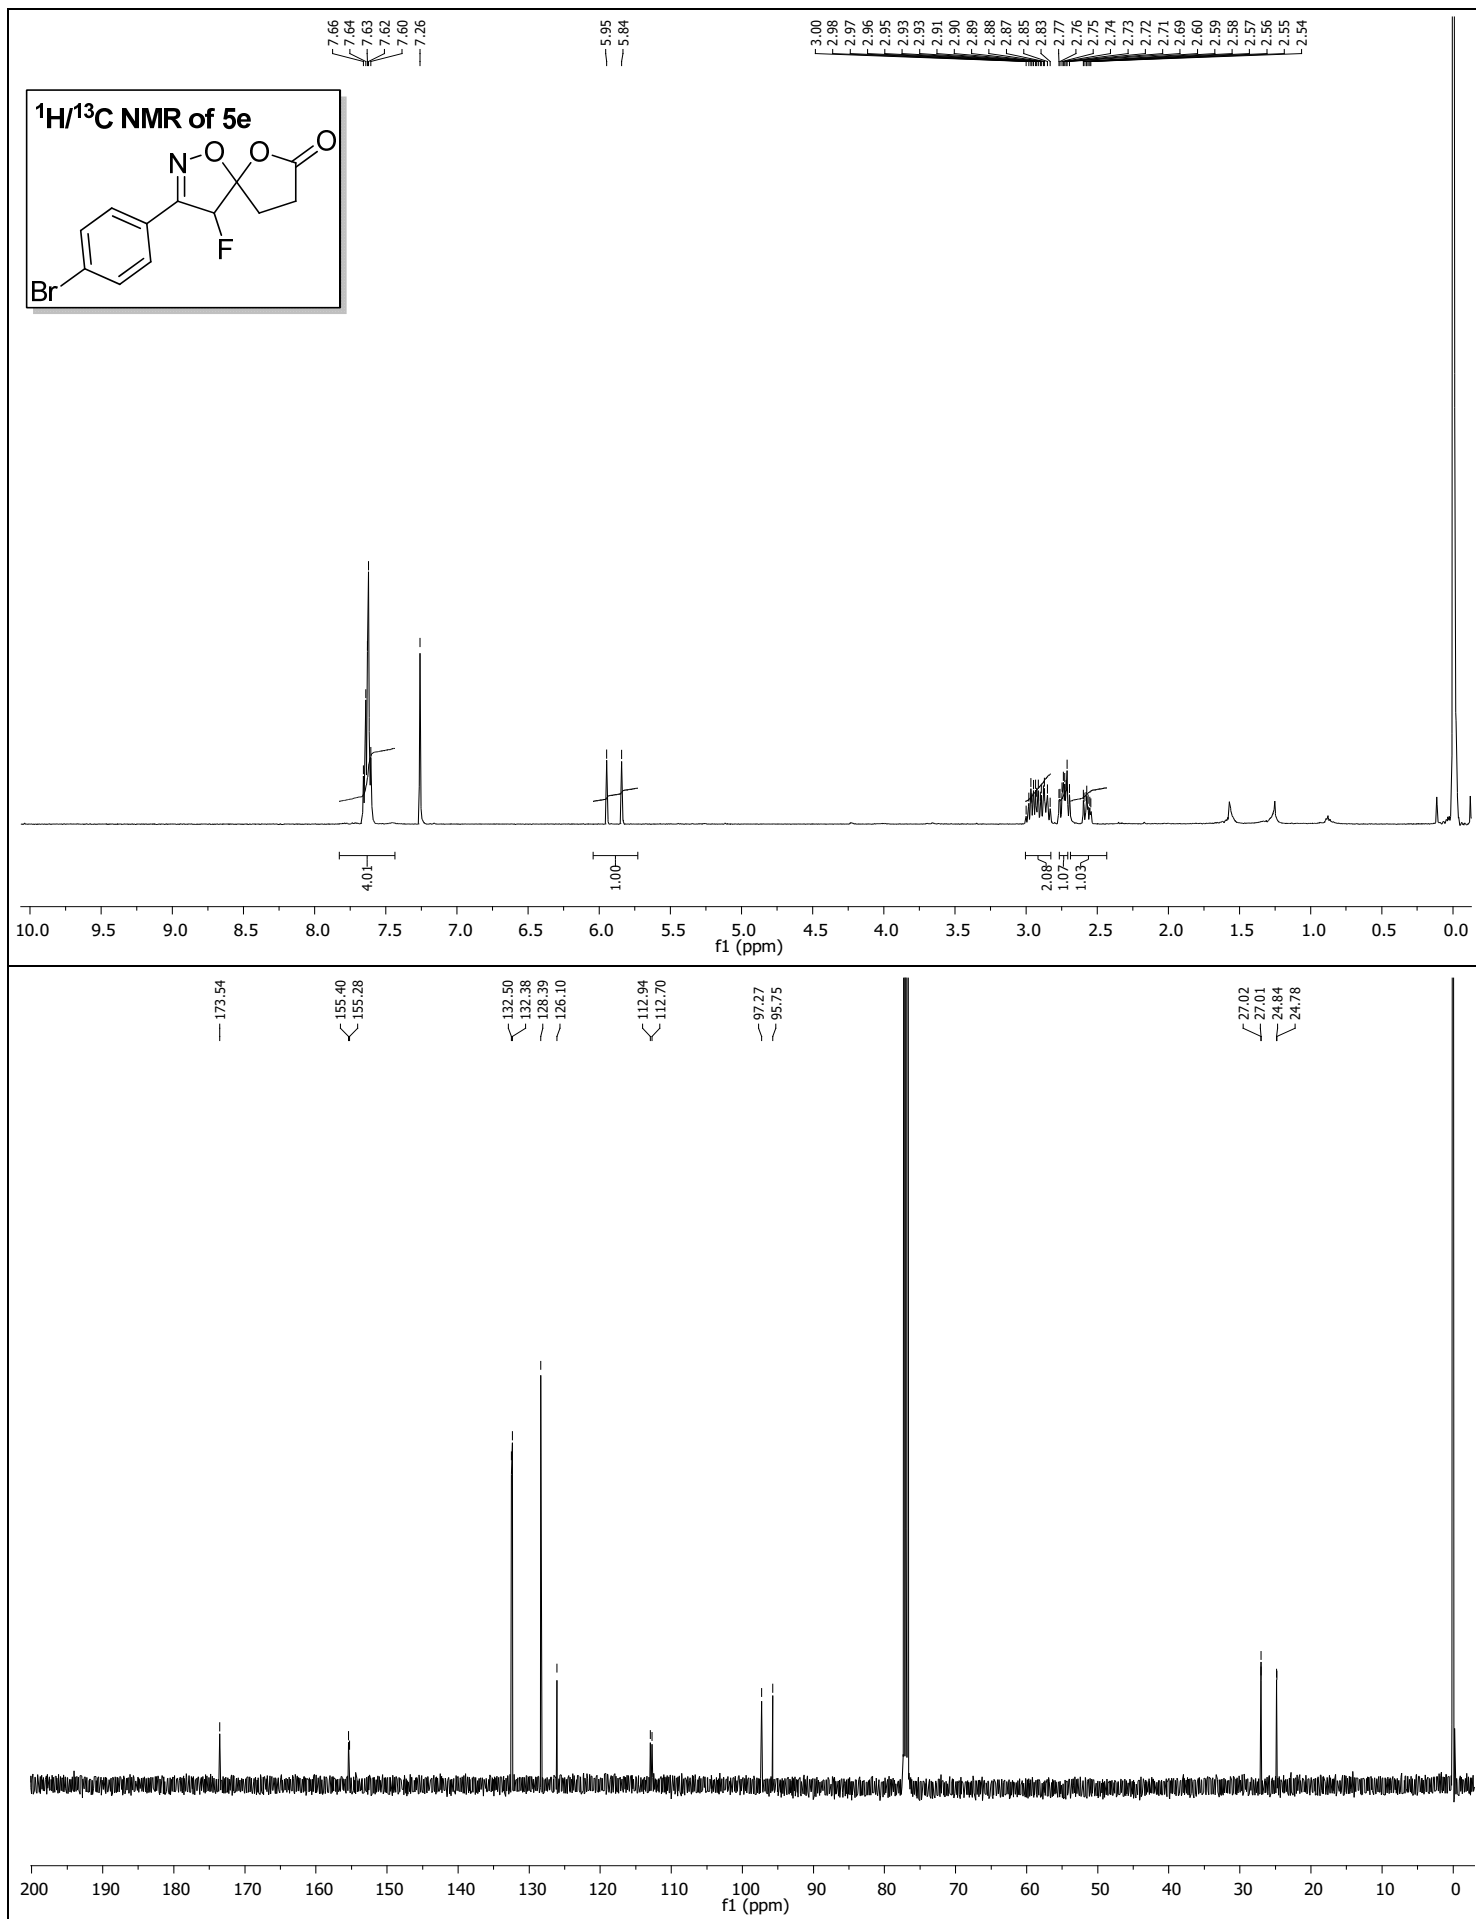

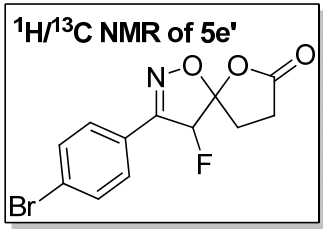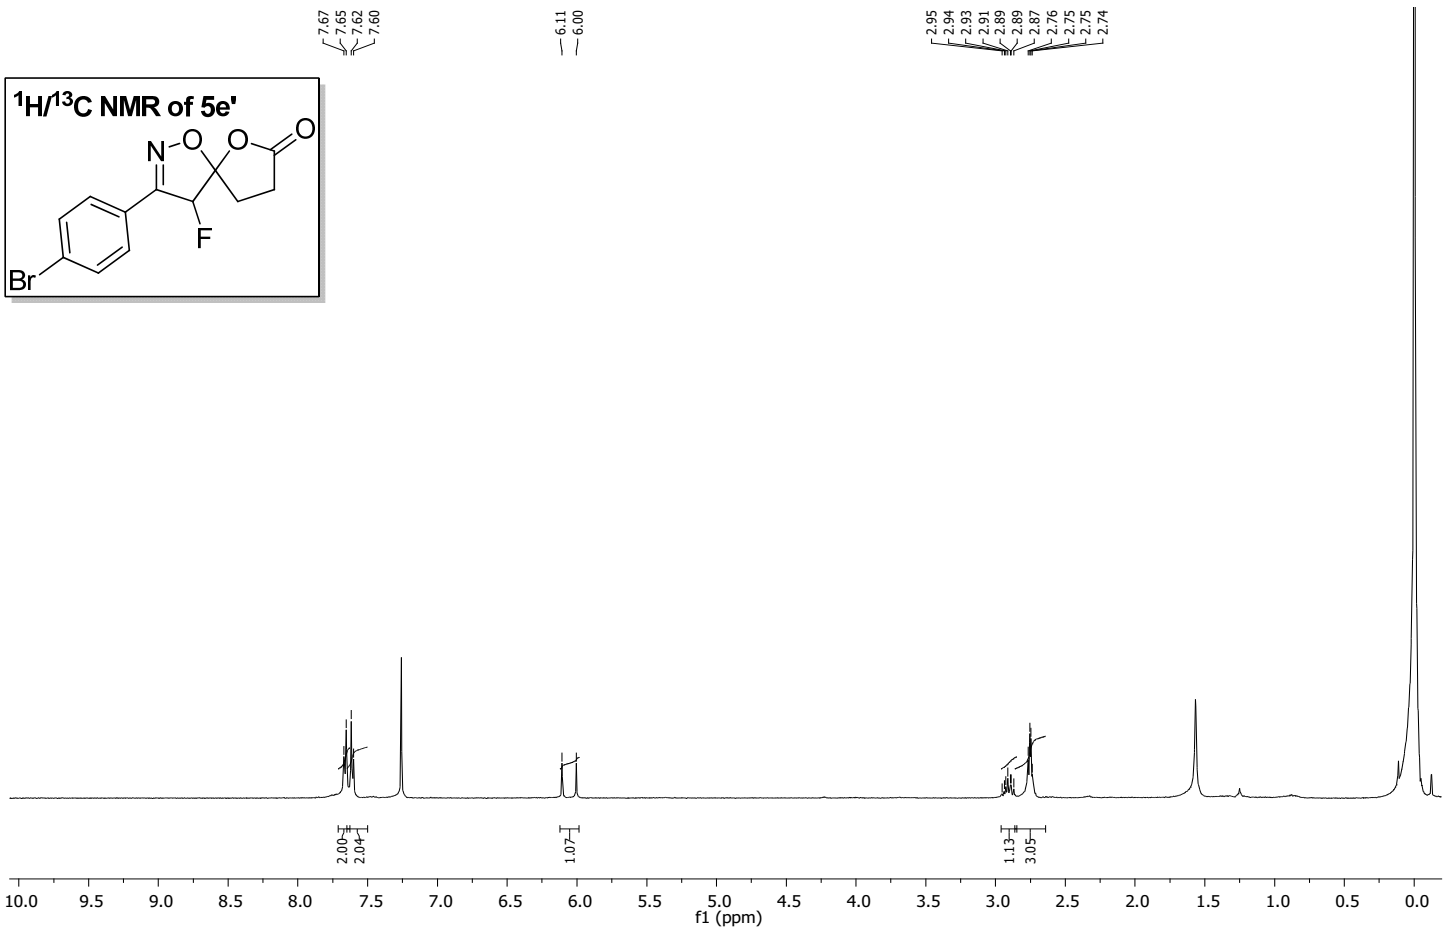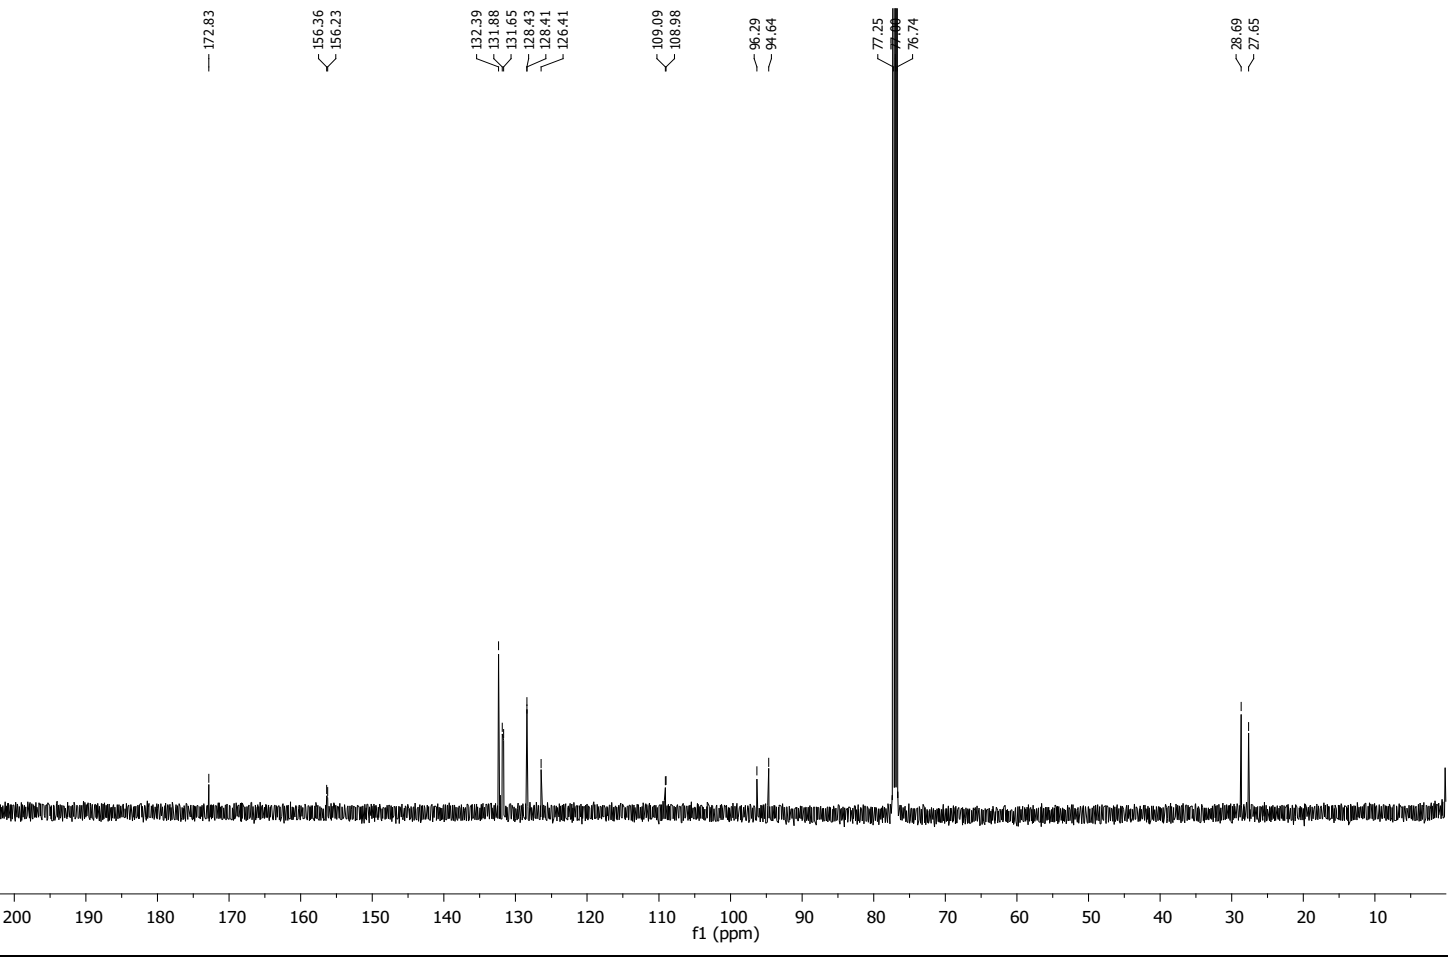

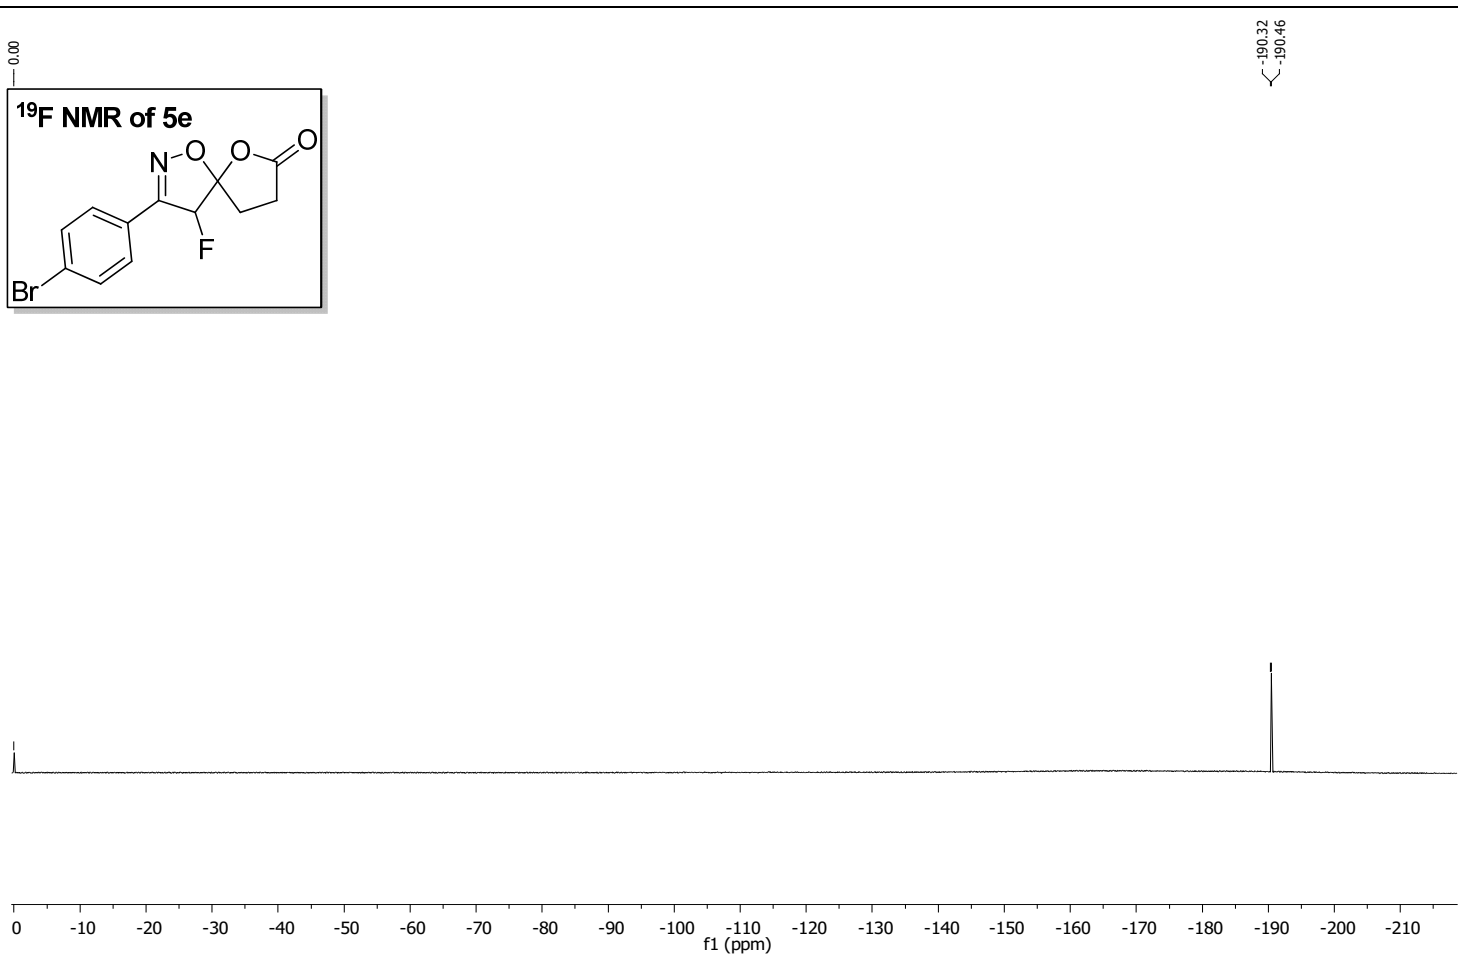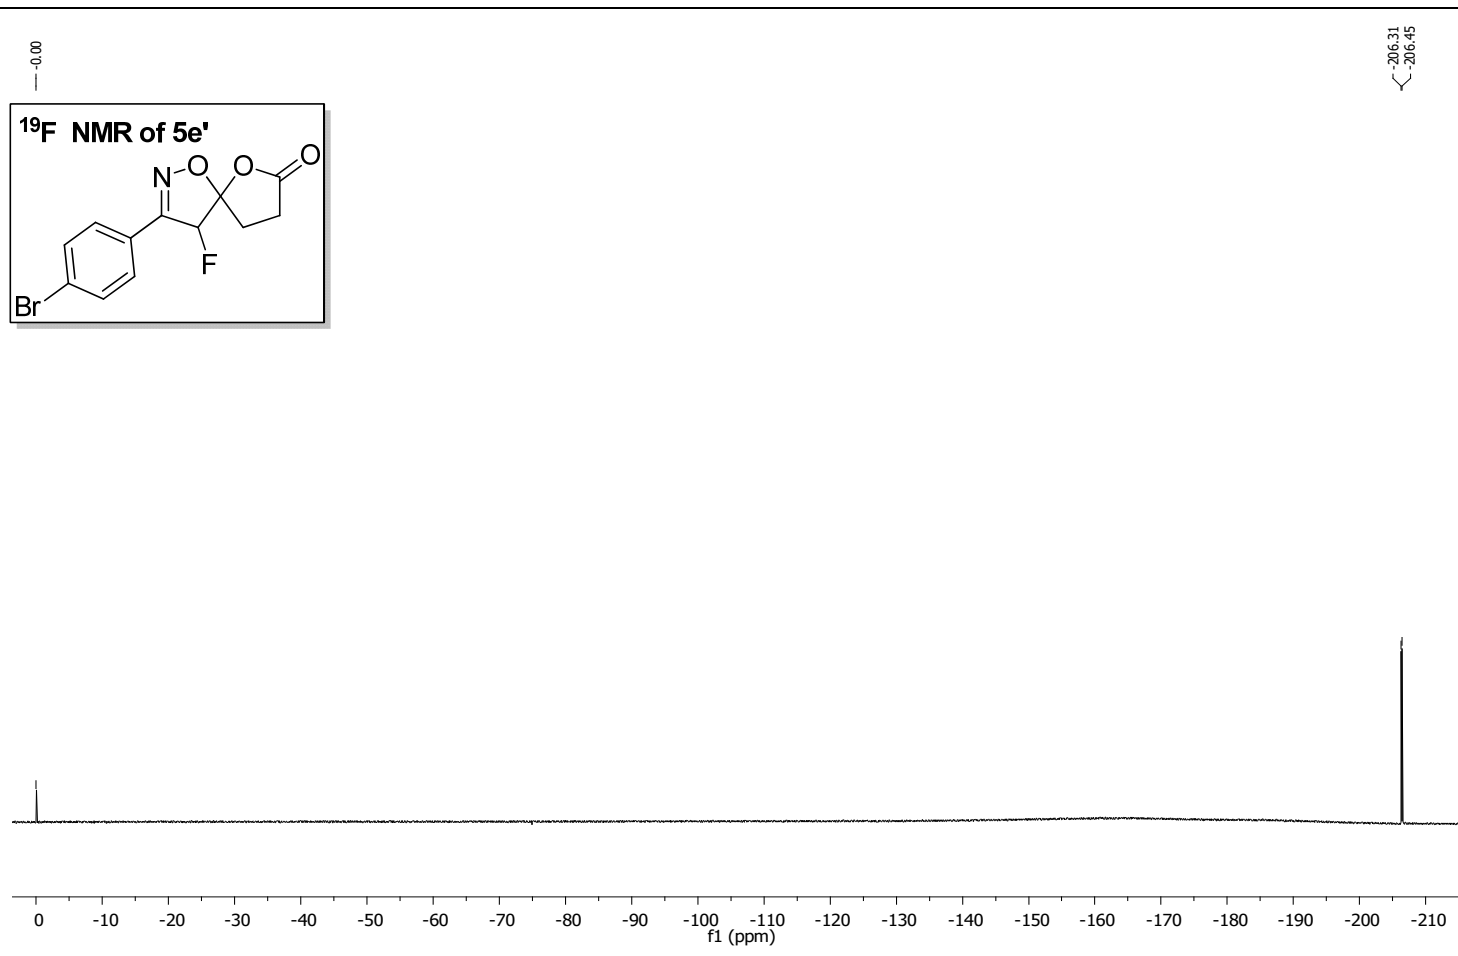



**$^1\text{H}/^{13}\text{C}$  NMR of 5f**

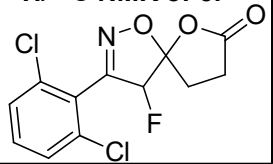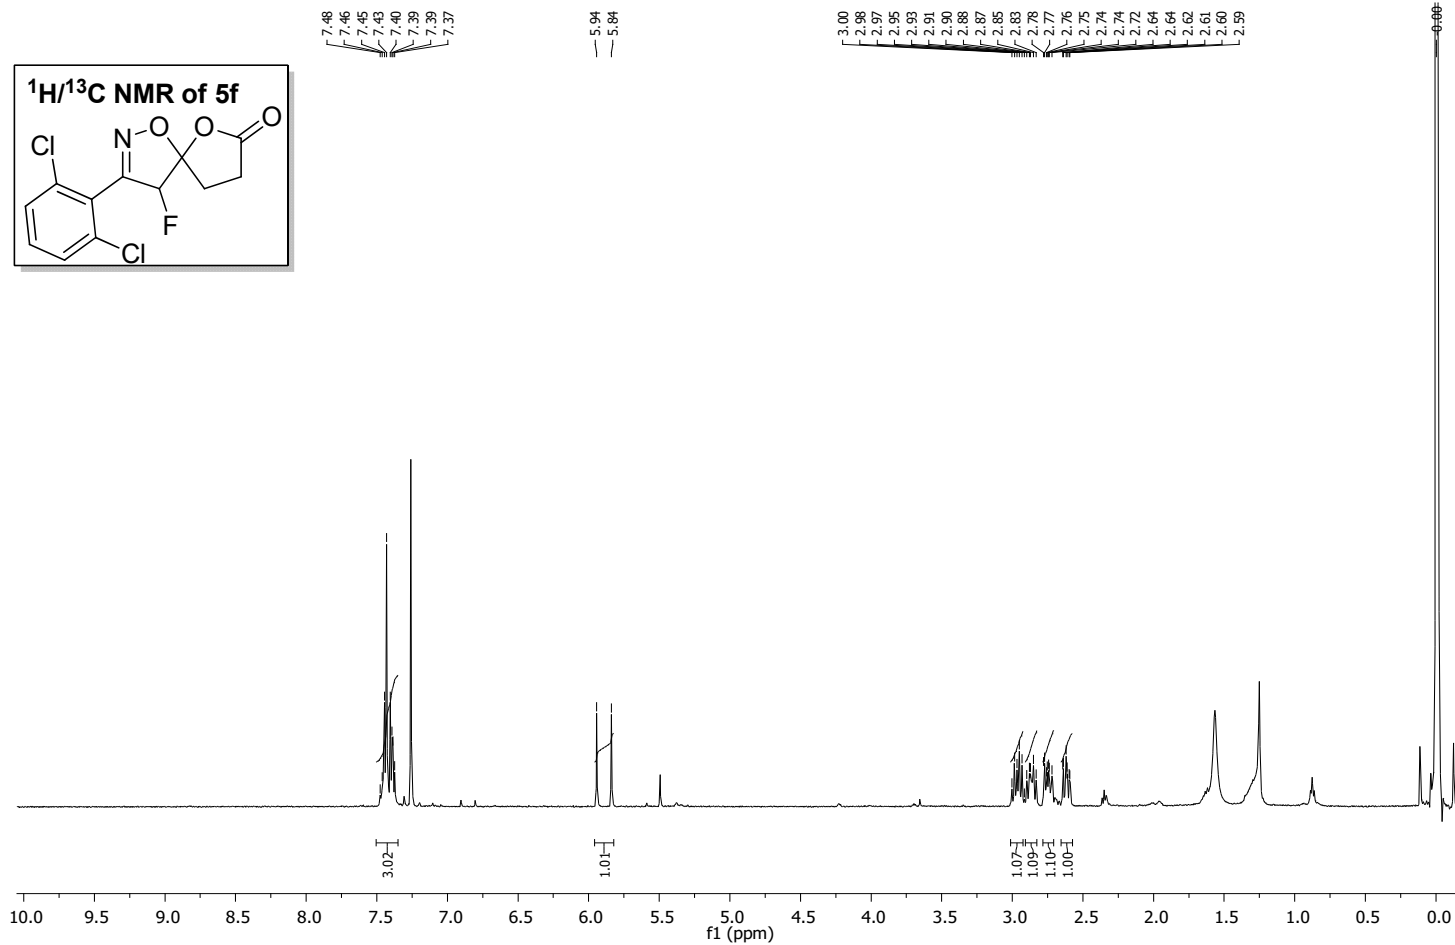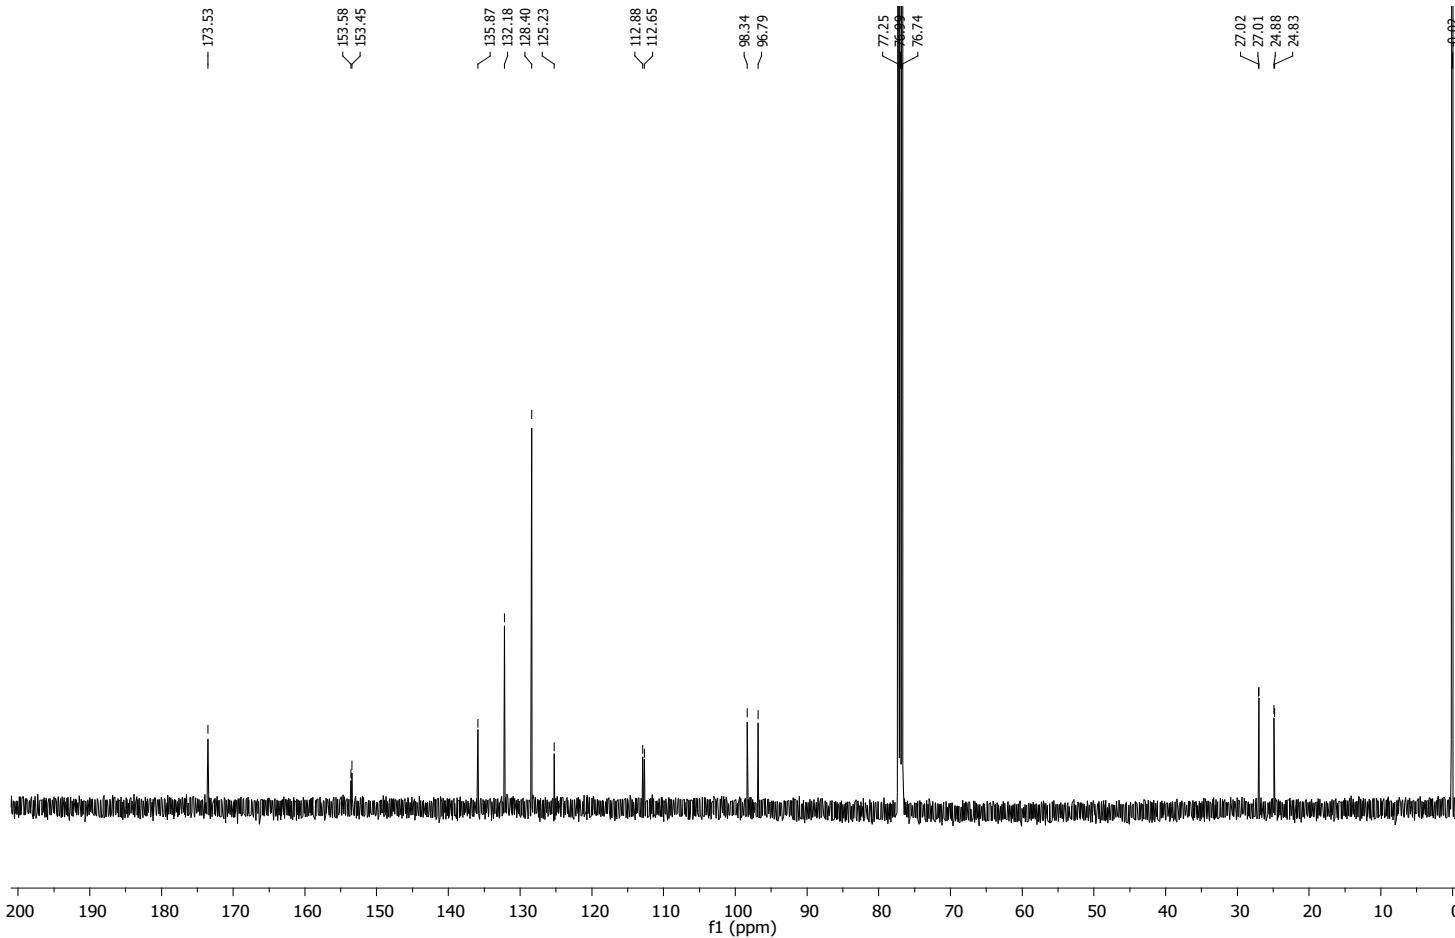

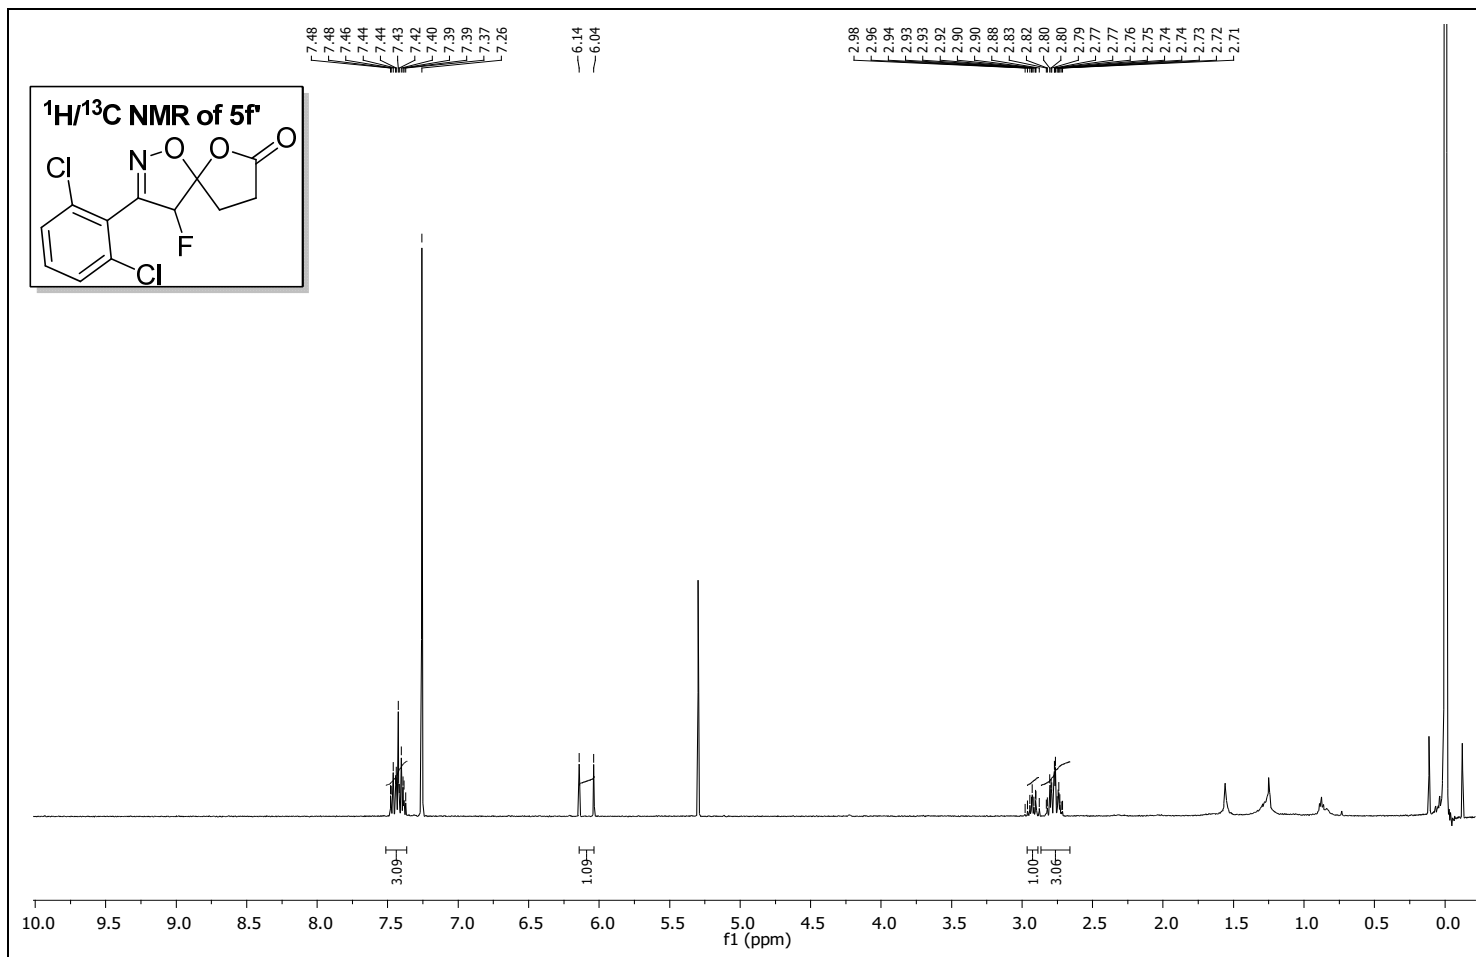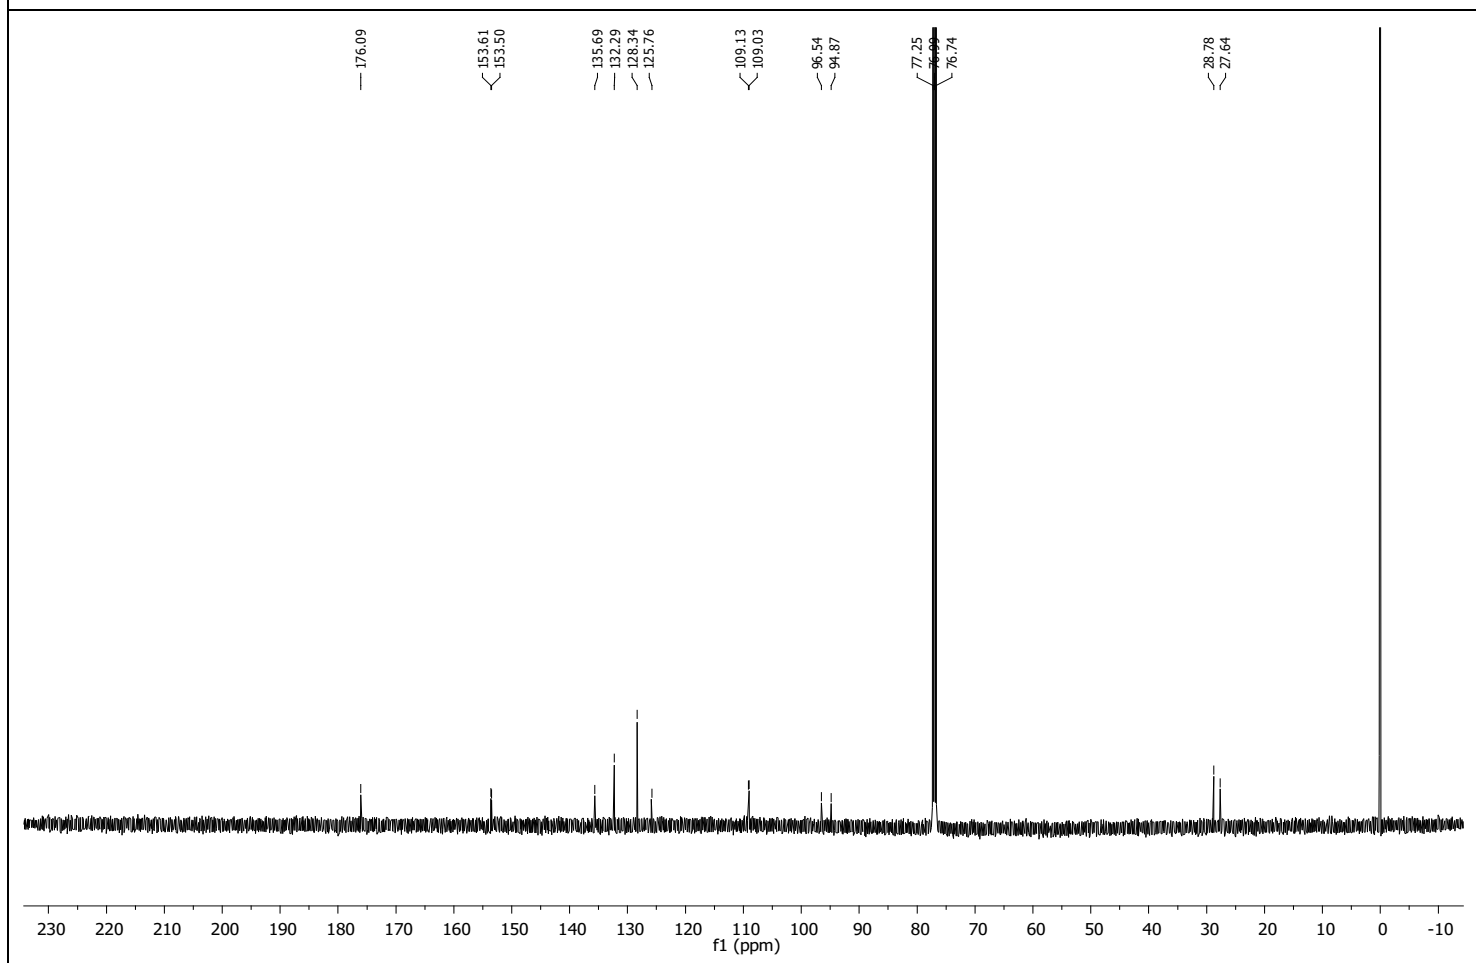

0.003

-187.590  
-187.724

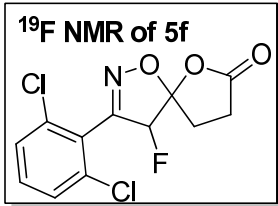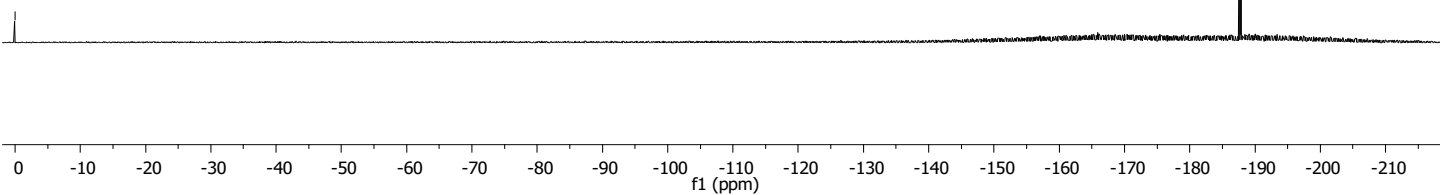

0.00

-191.39  
-191.53

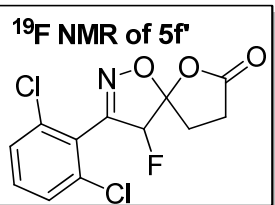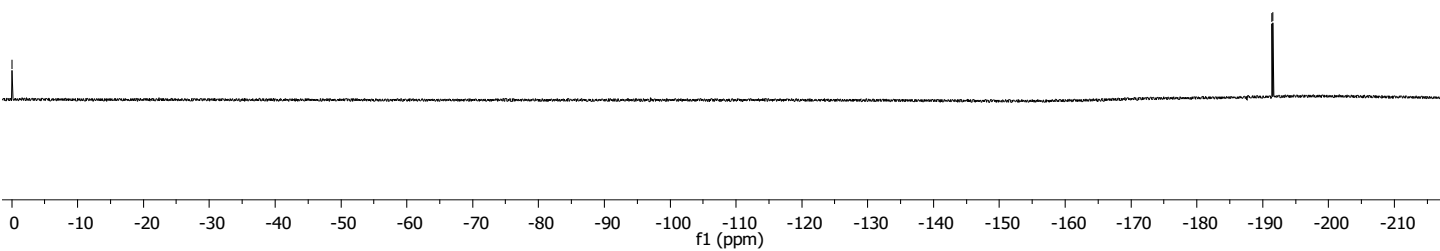

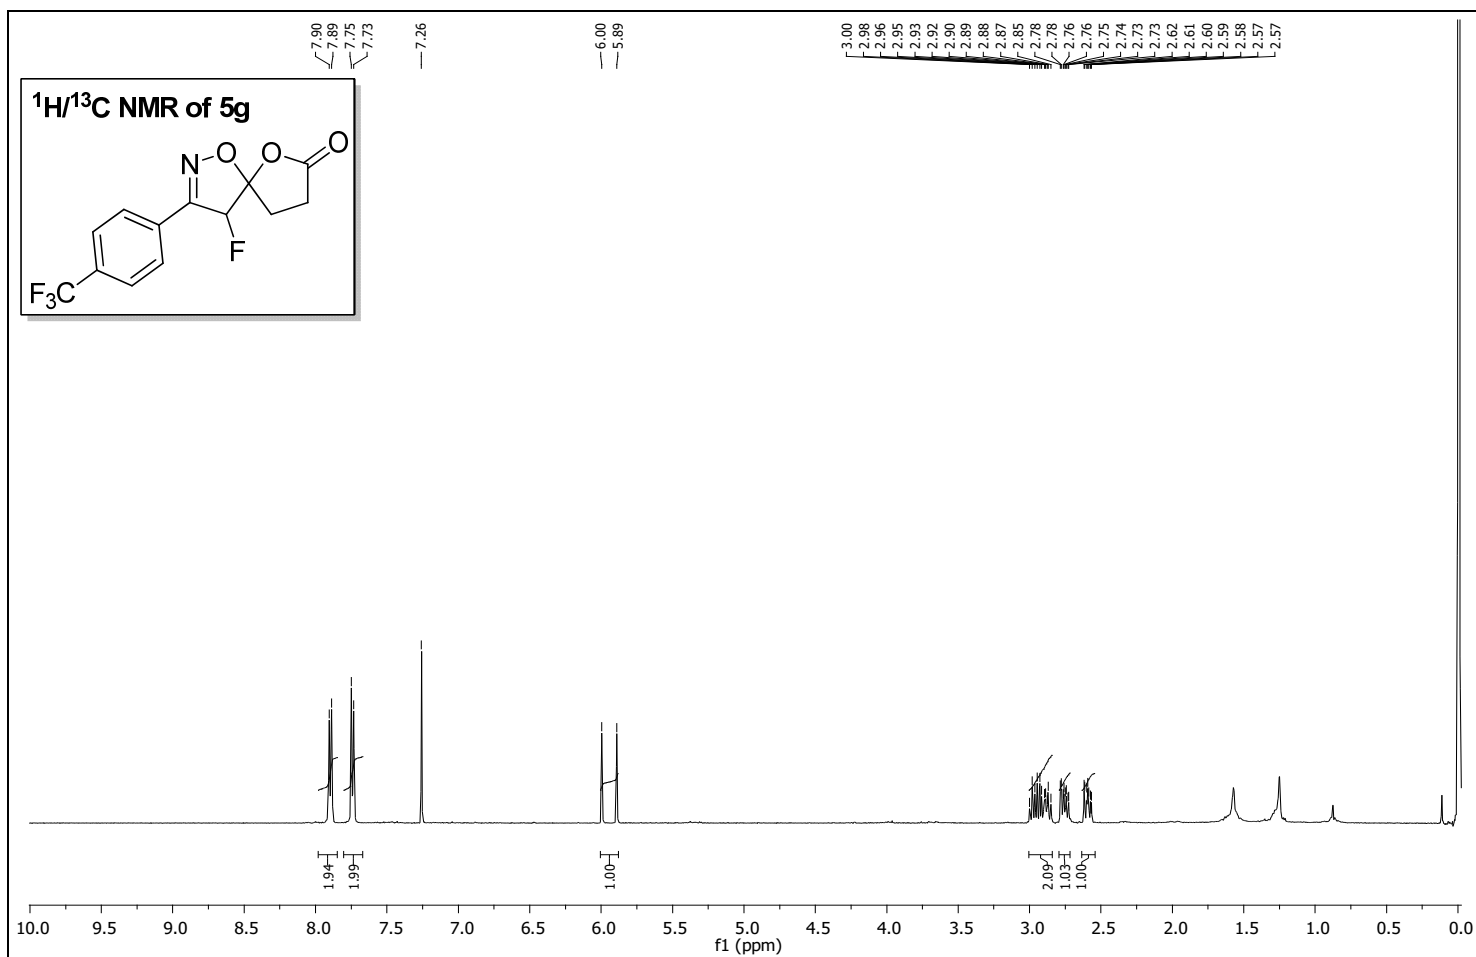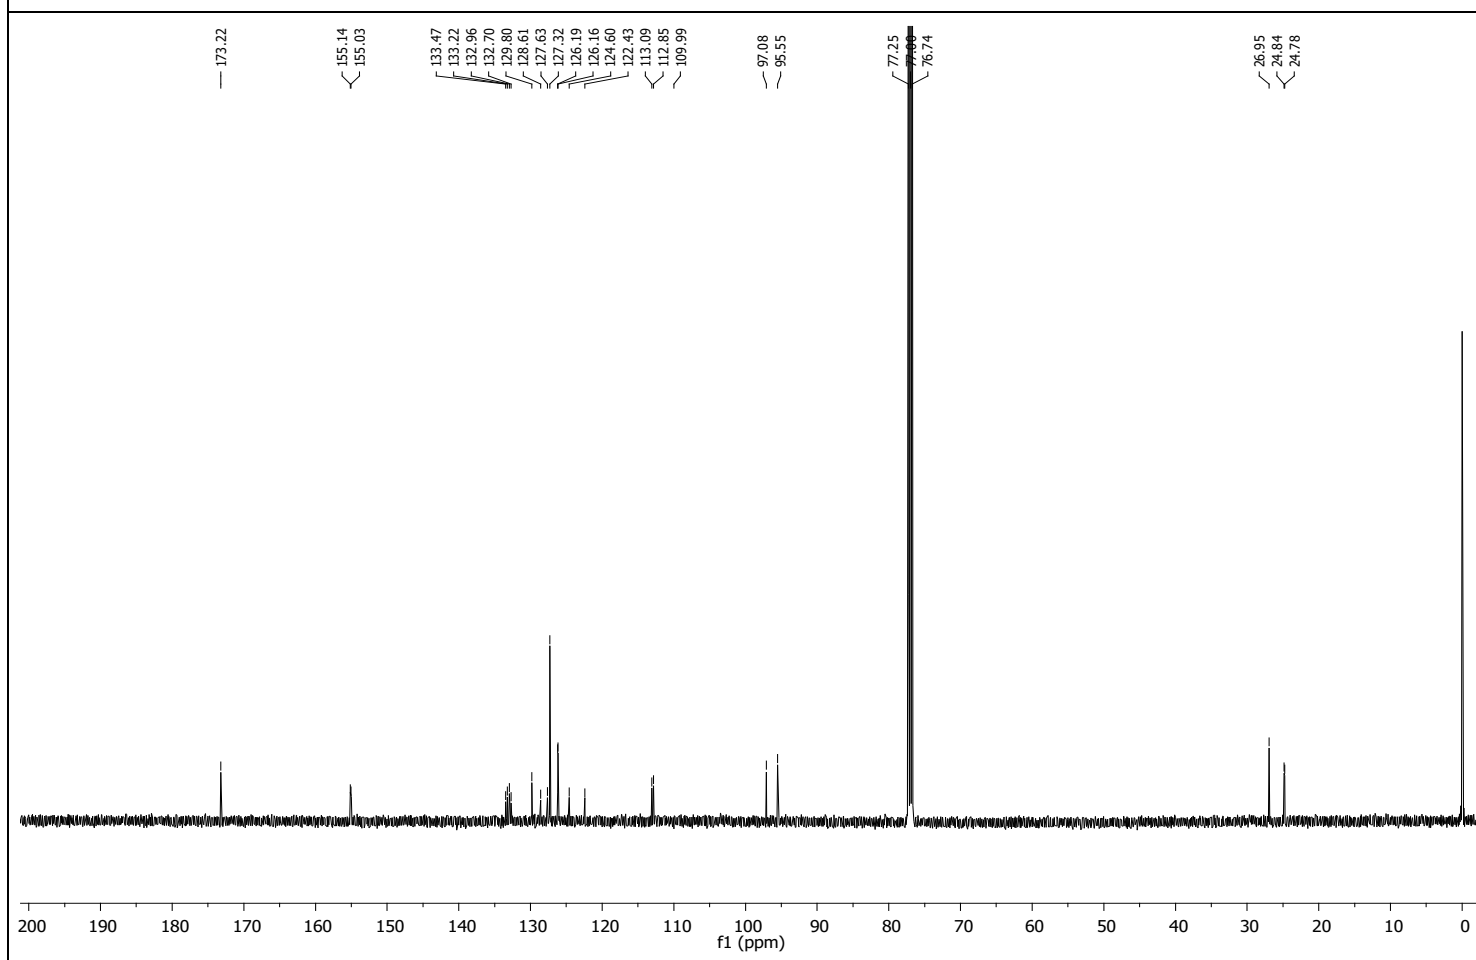

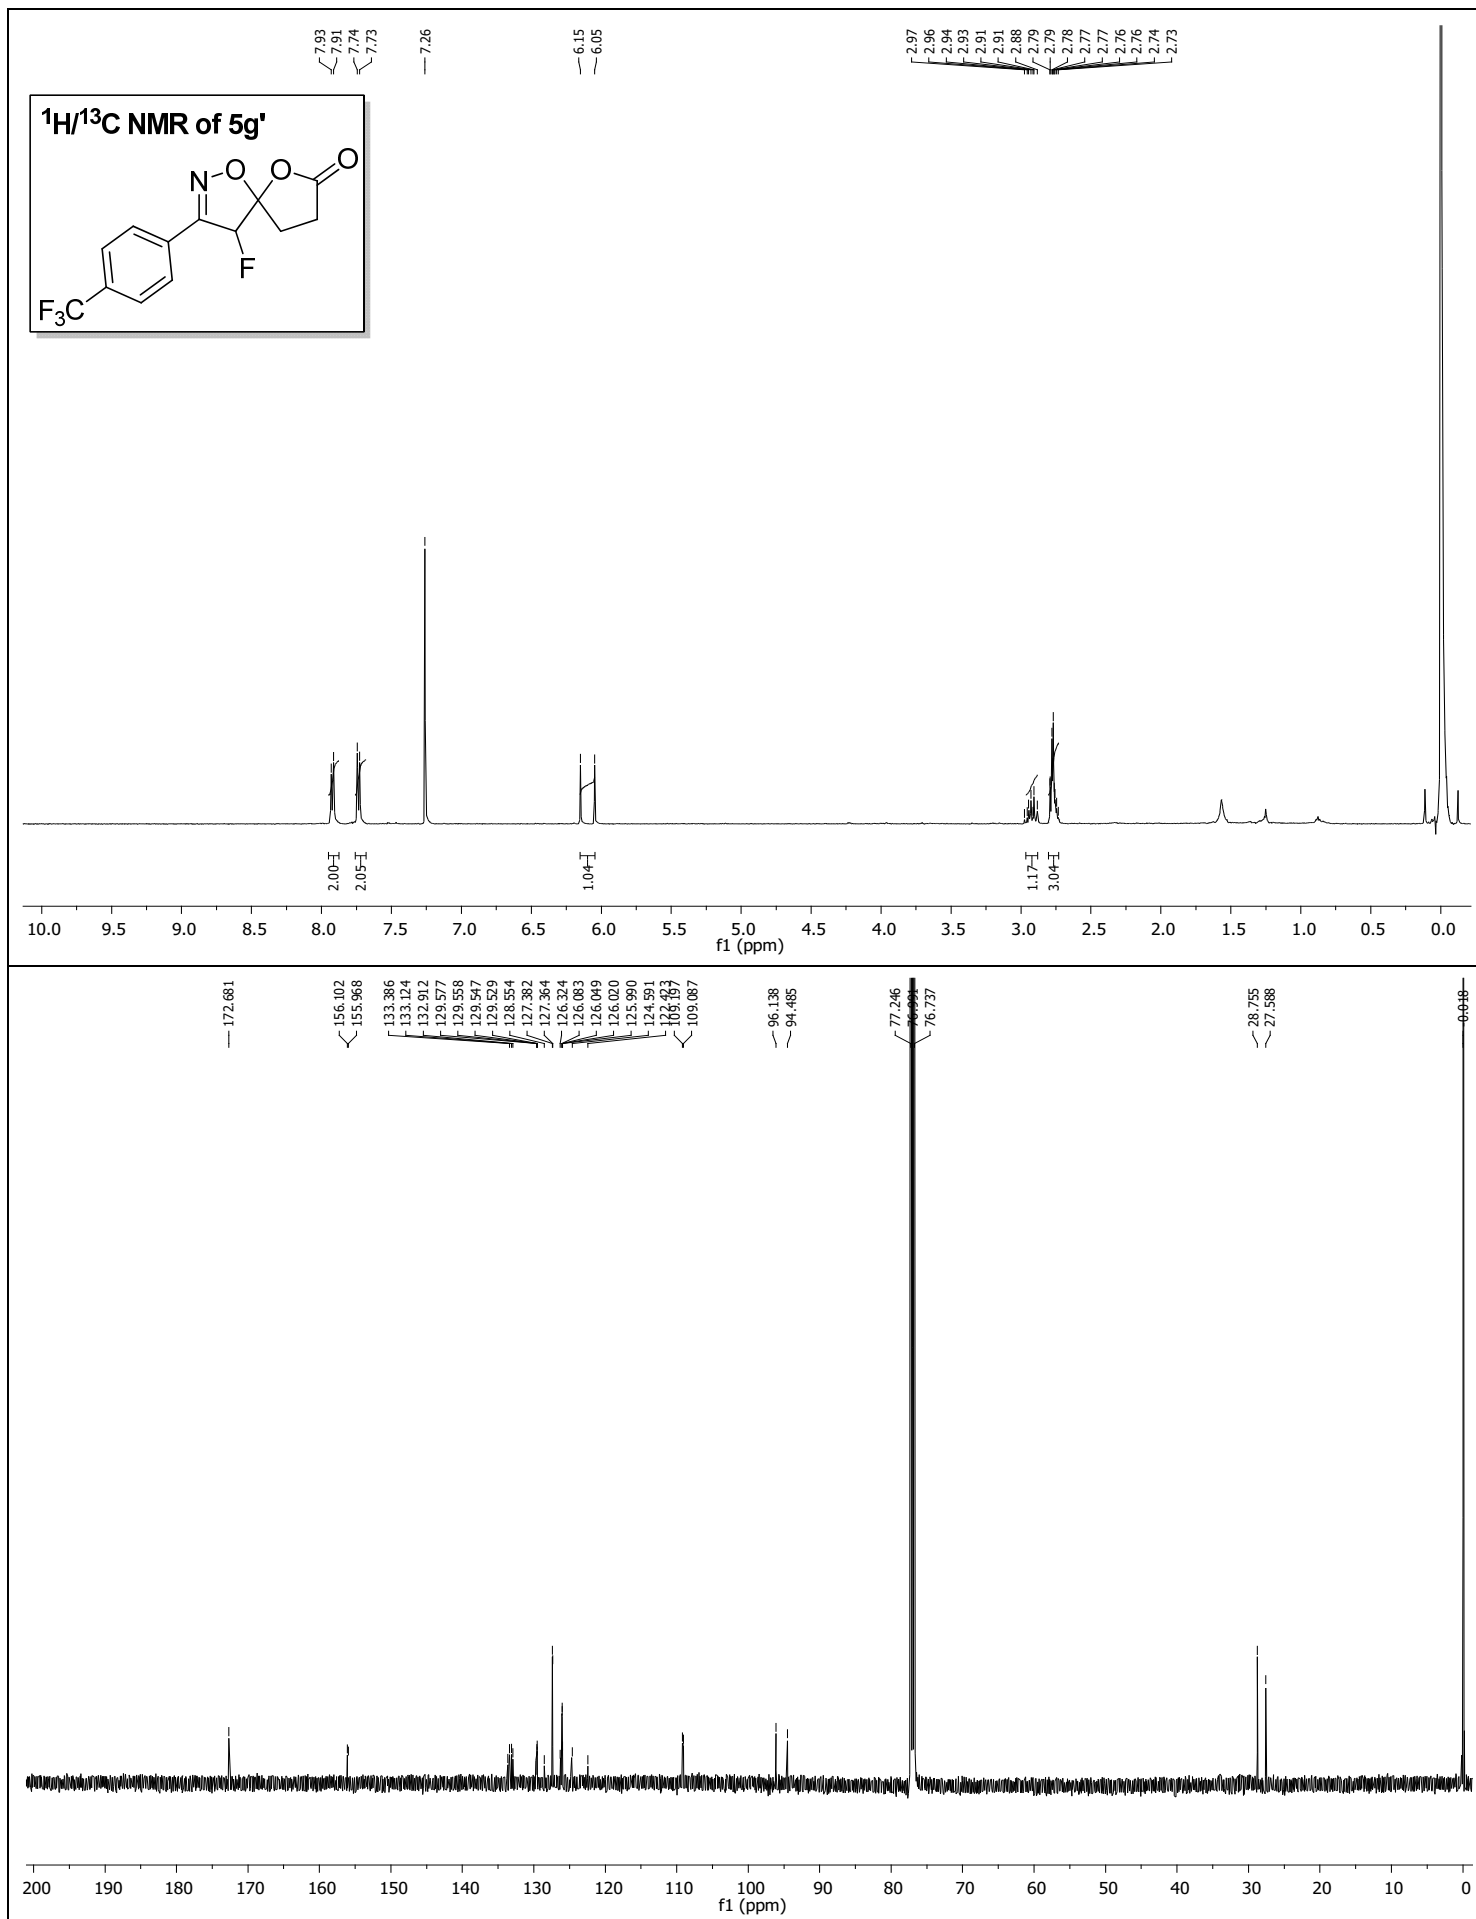

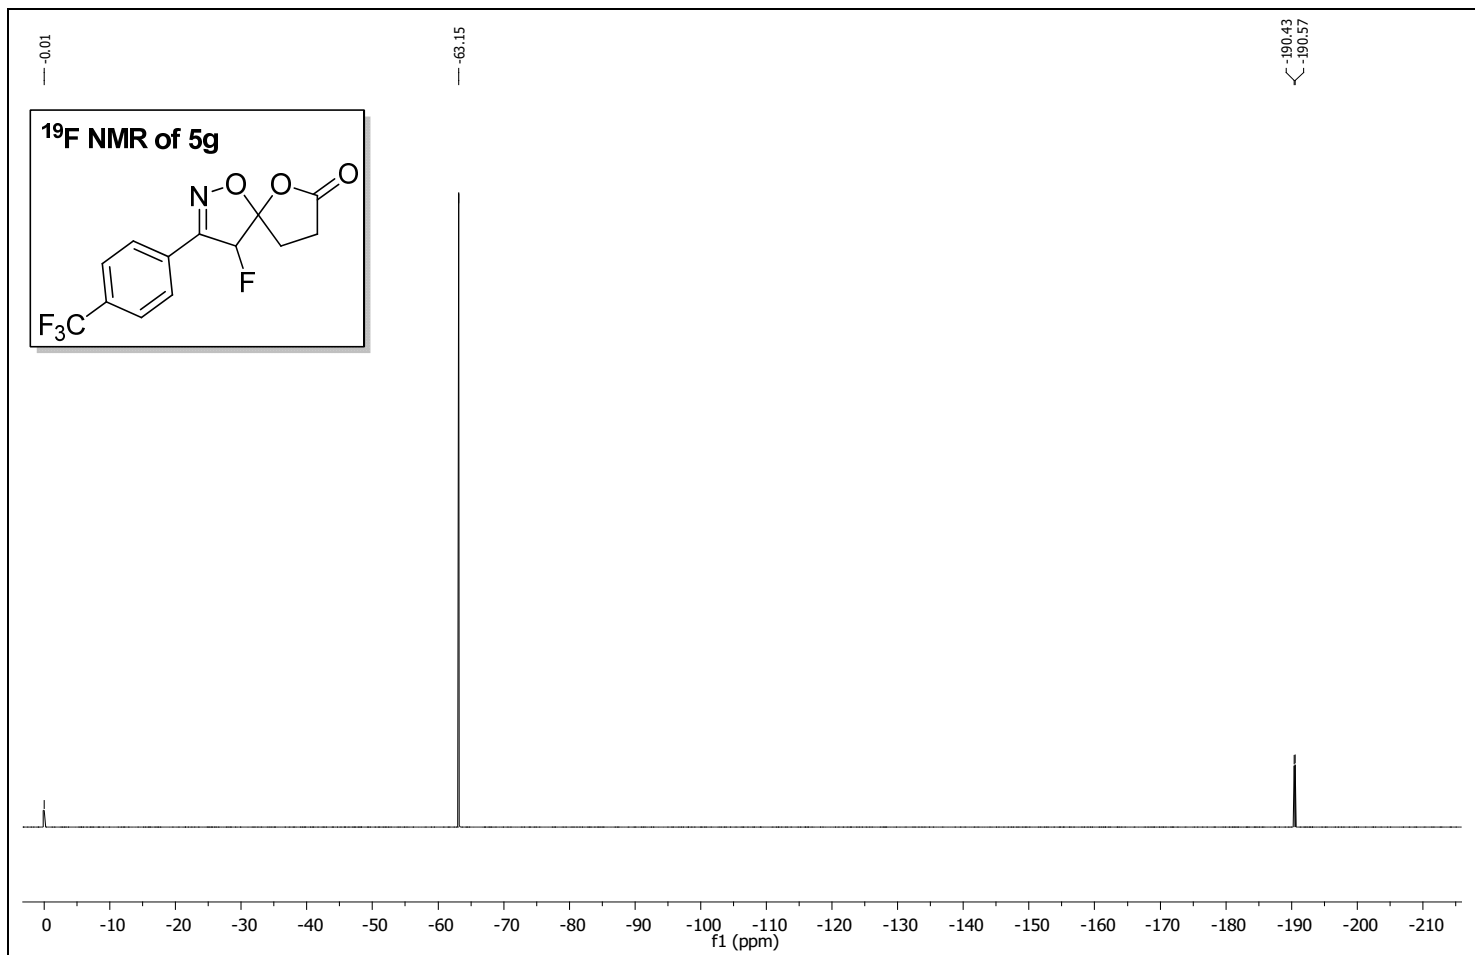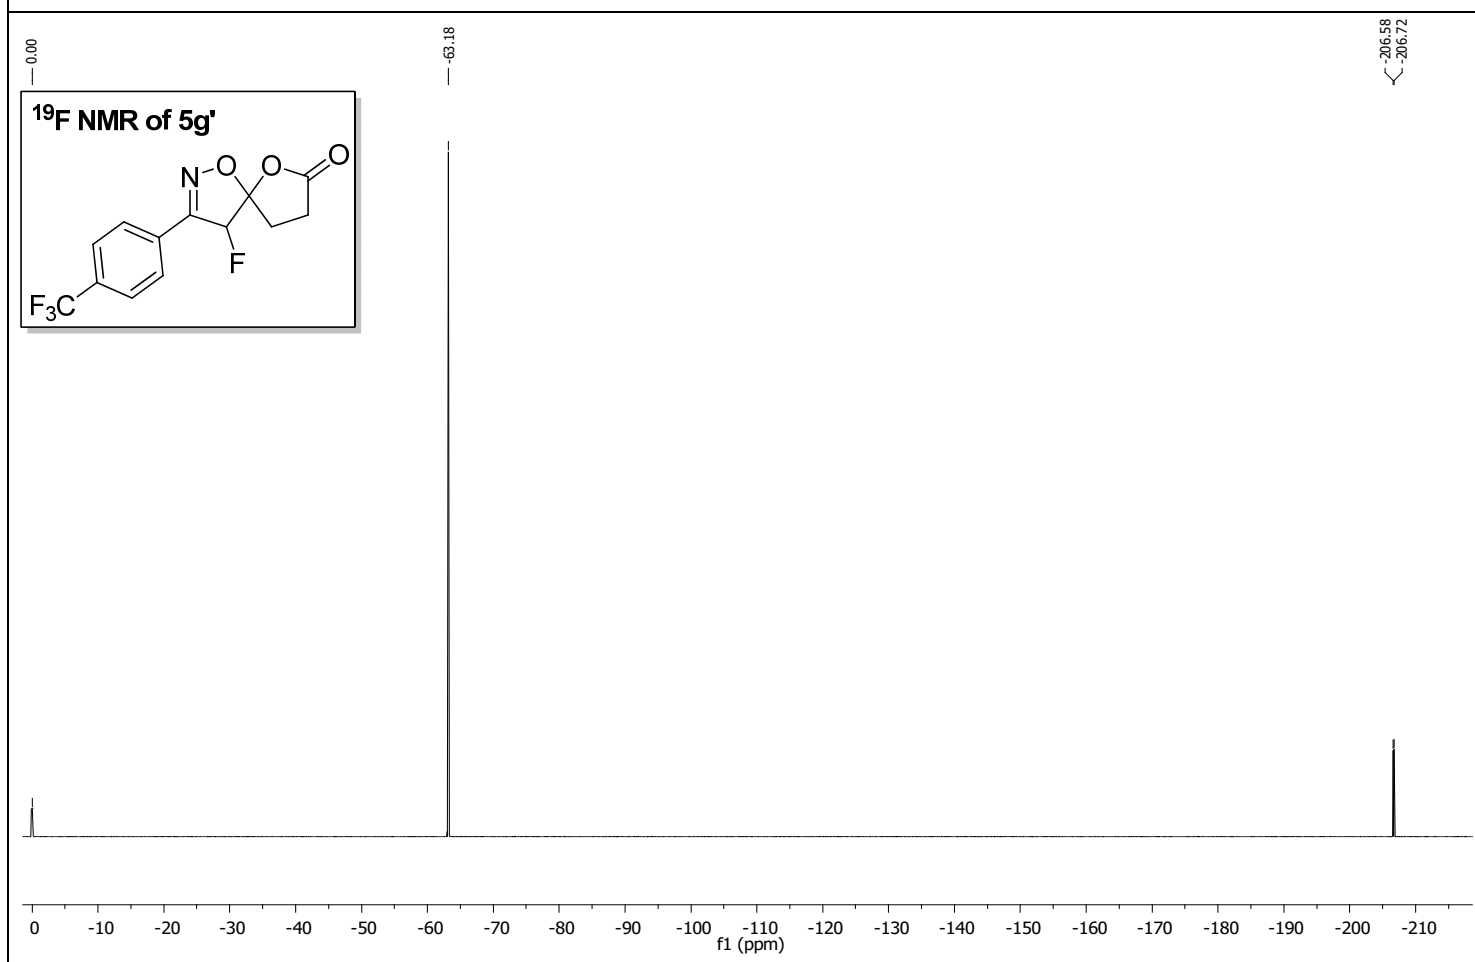

**$^1\text{H}/^{13}\text{C}$  NMR of 5h**

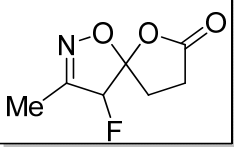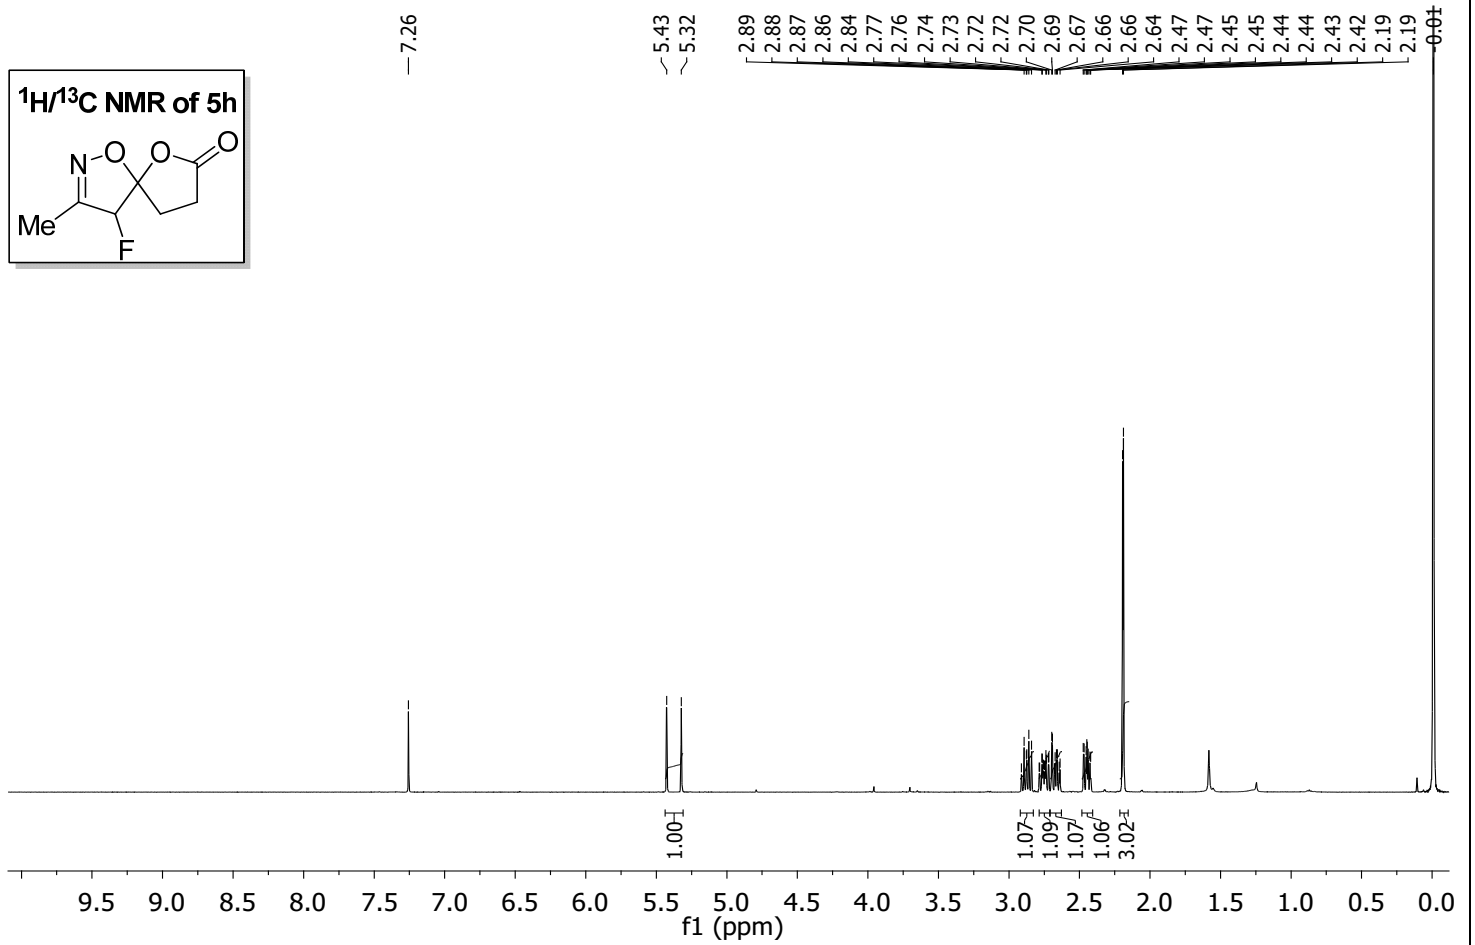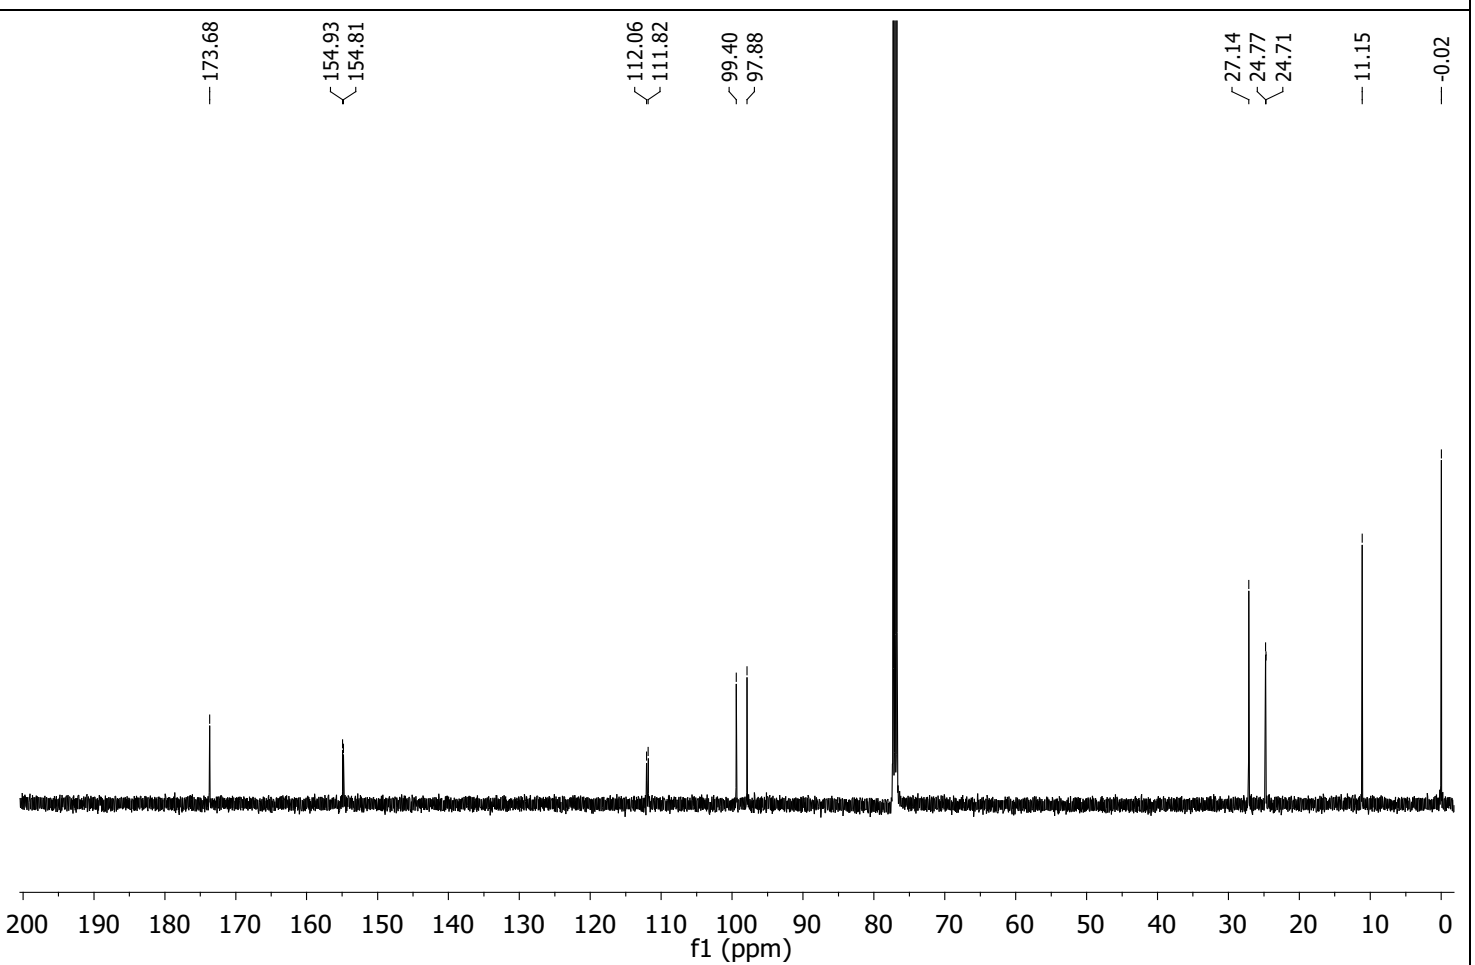

**$^1\text{H}/^{13}\text{C}$  NMR of 5h**

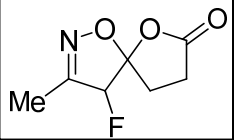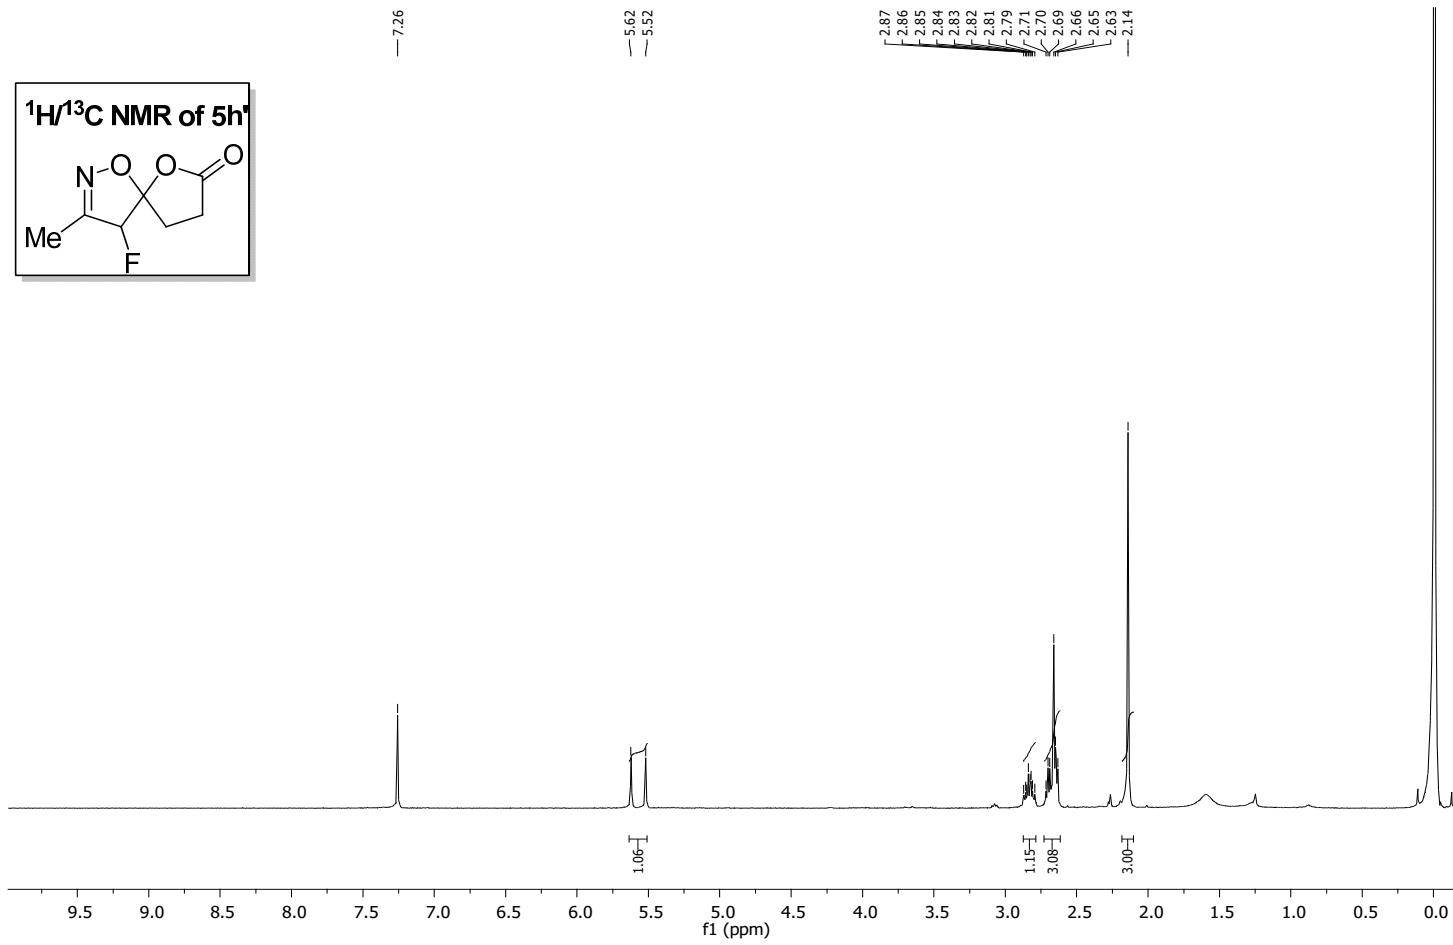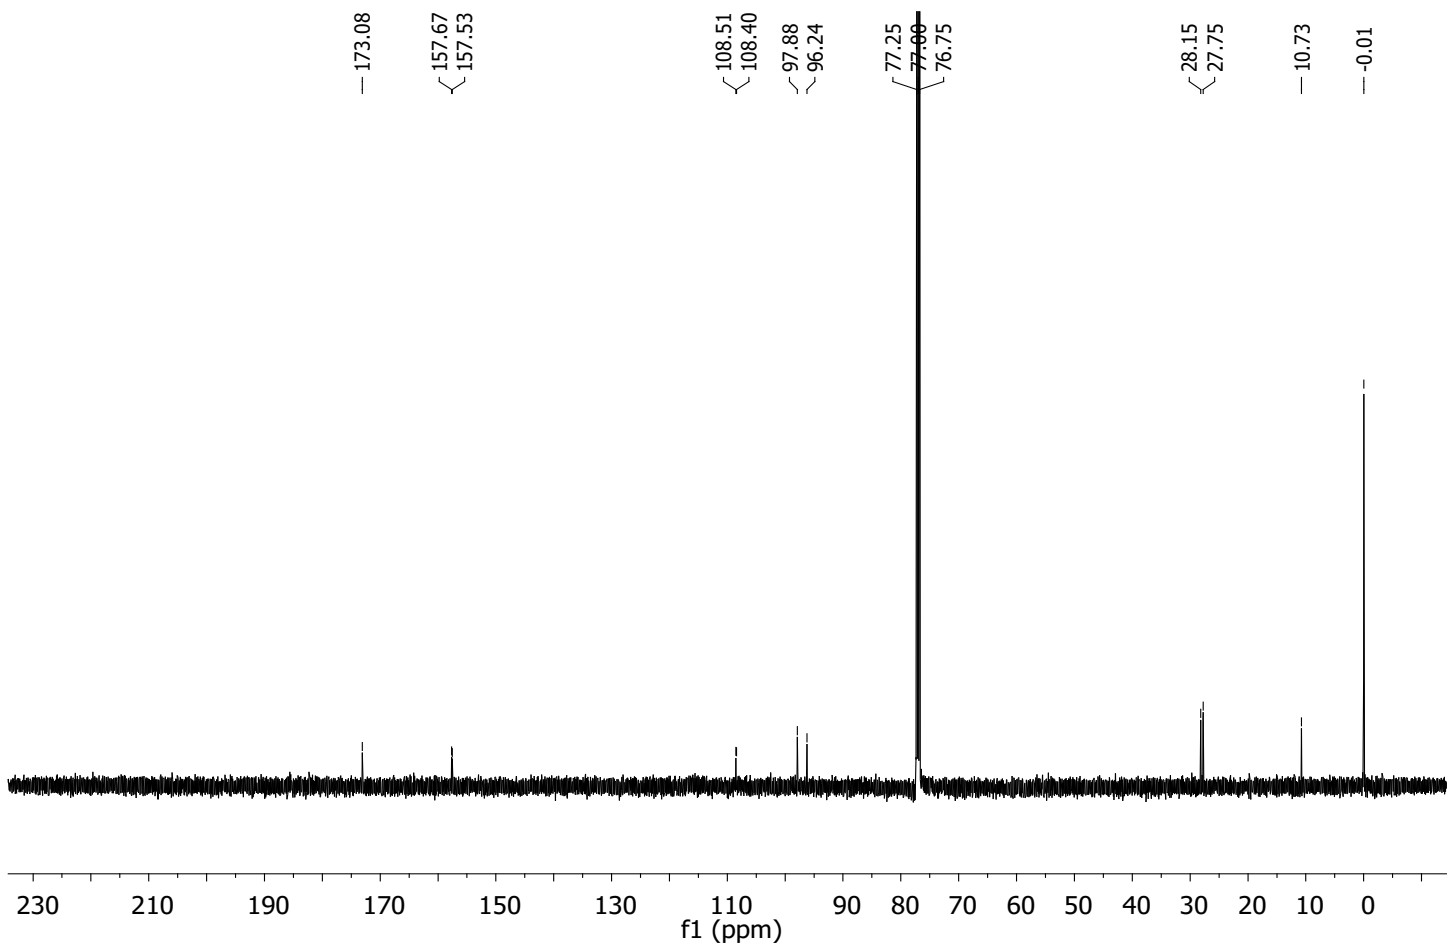



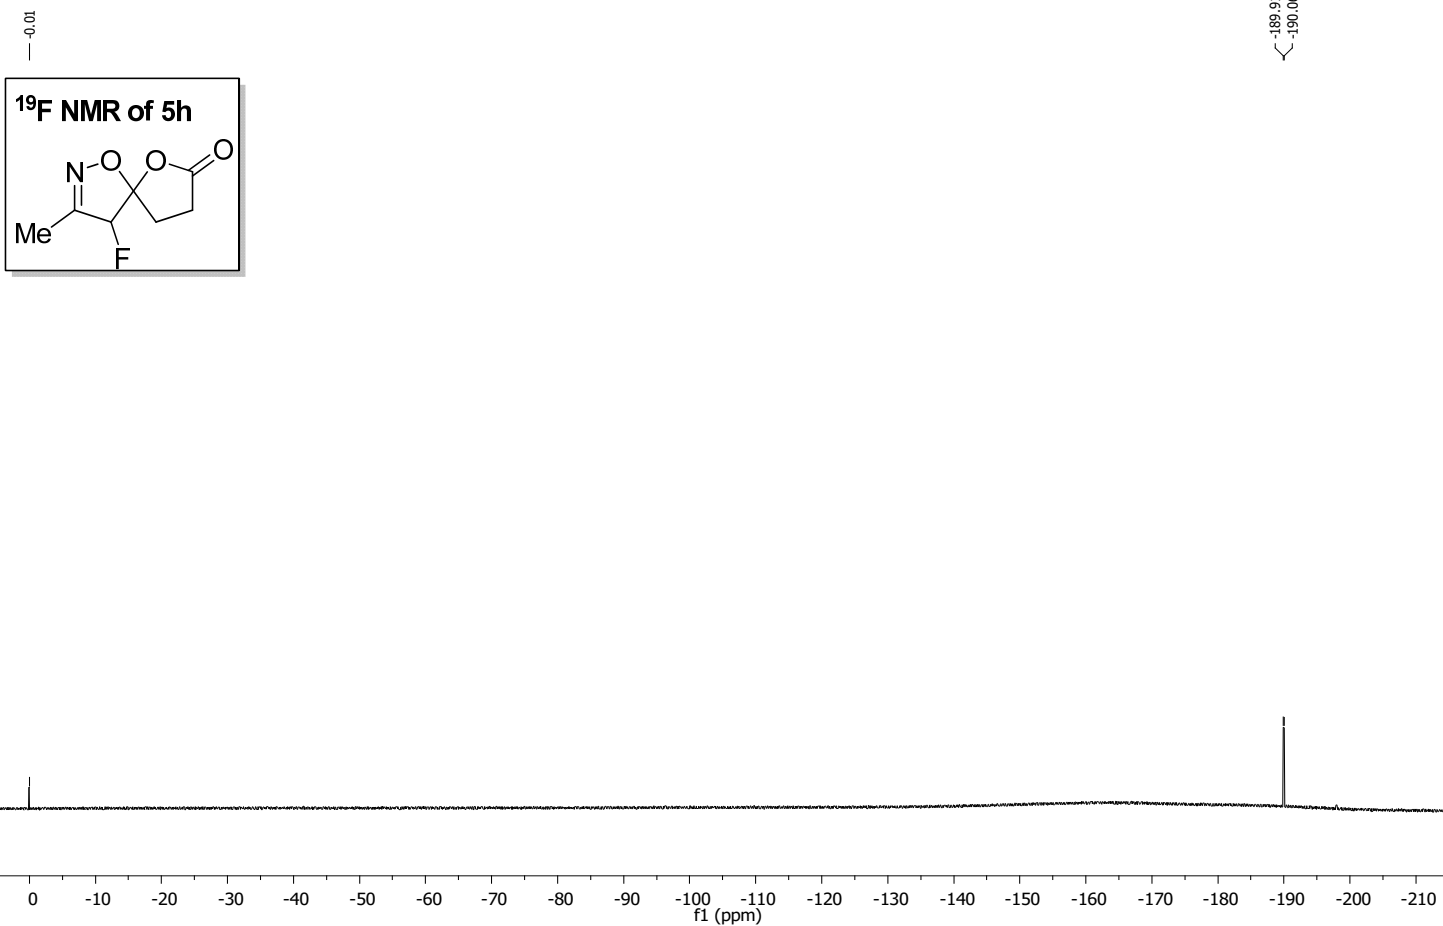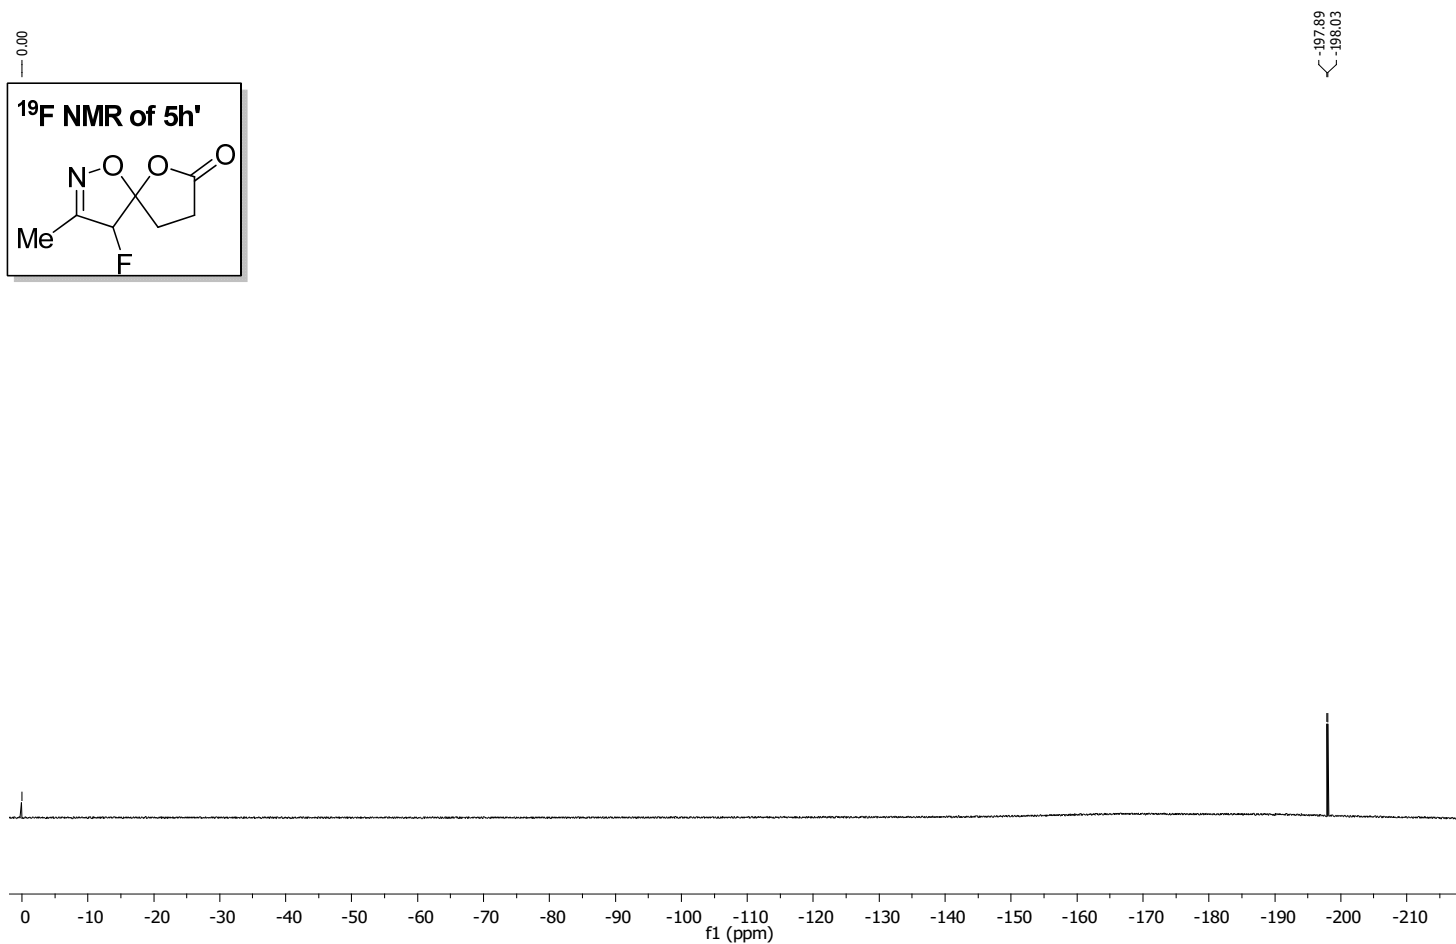

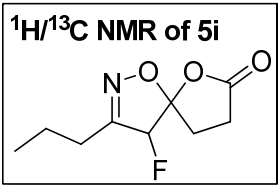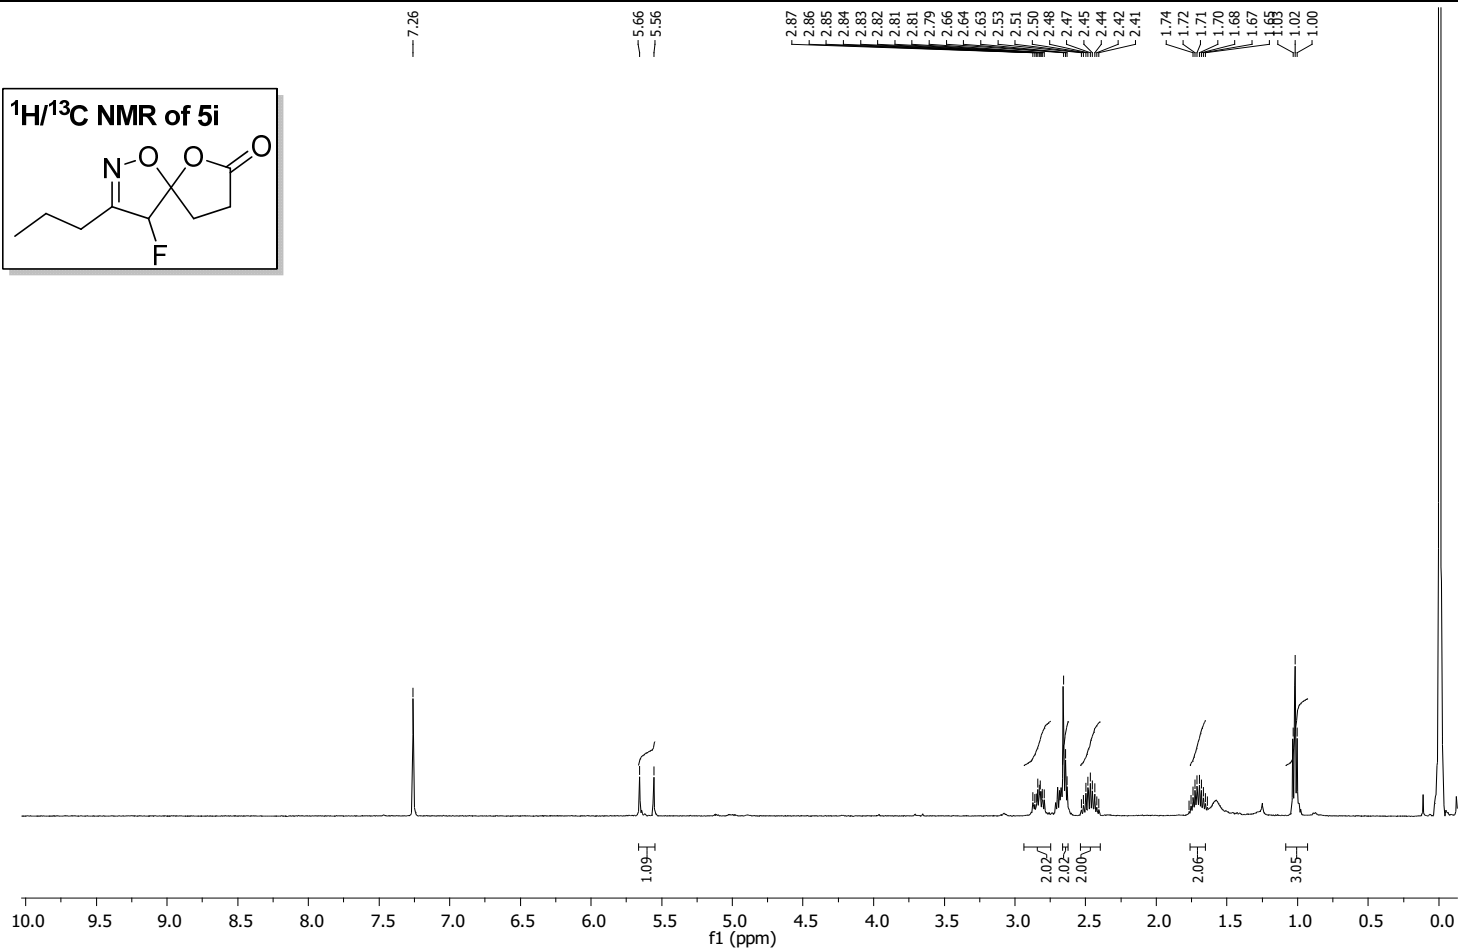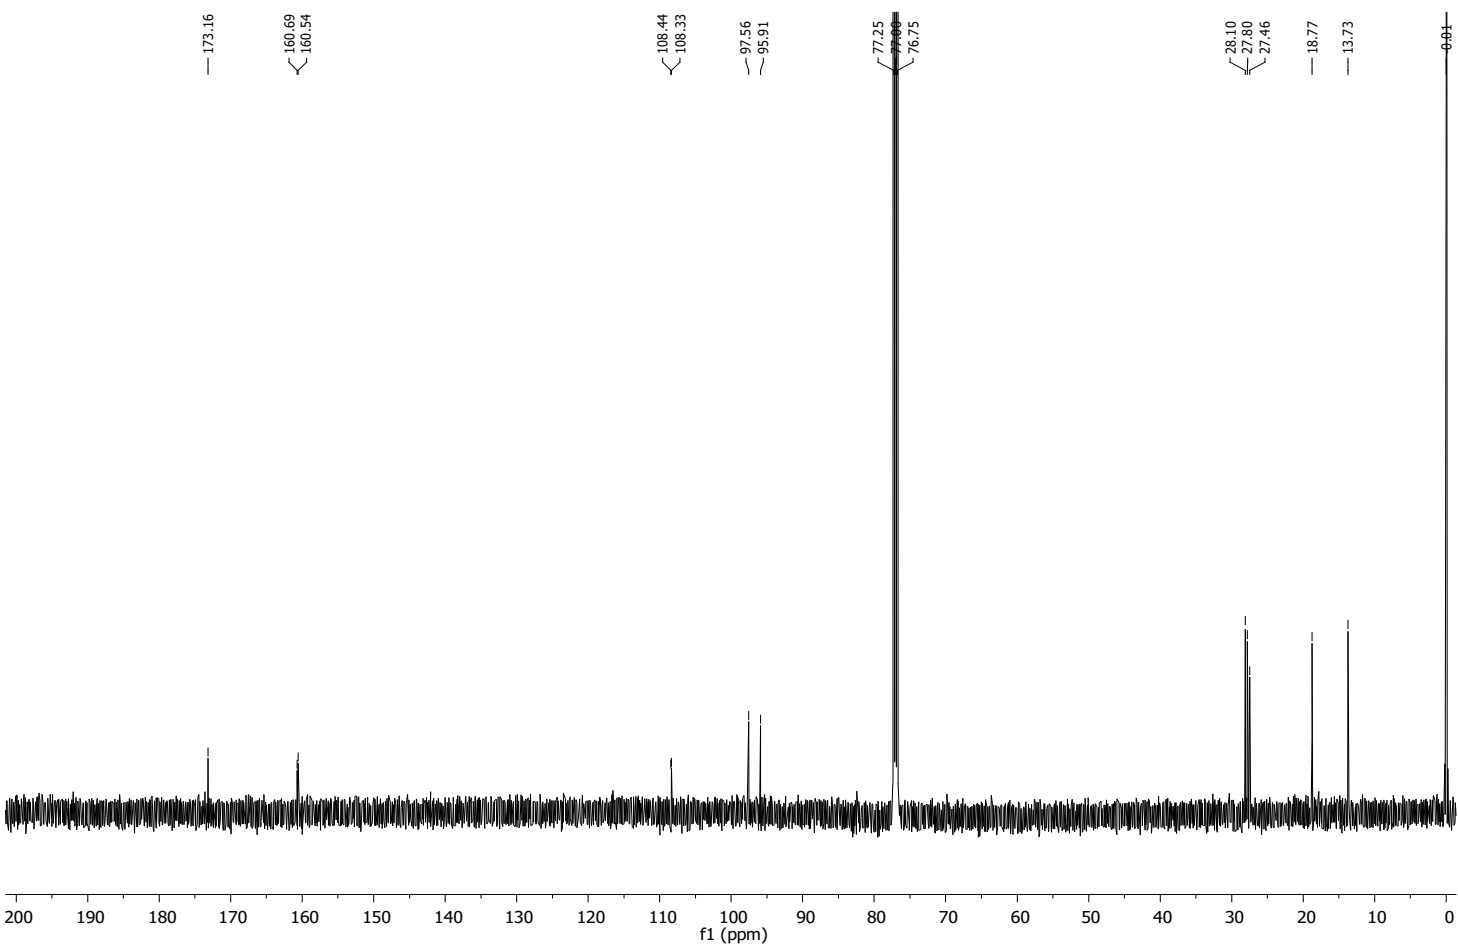

**<sup>1</sup>H NMR of 5i'**

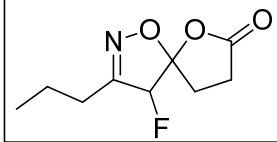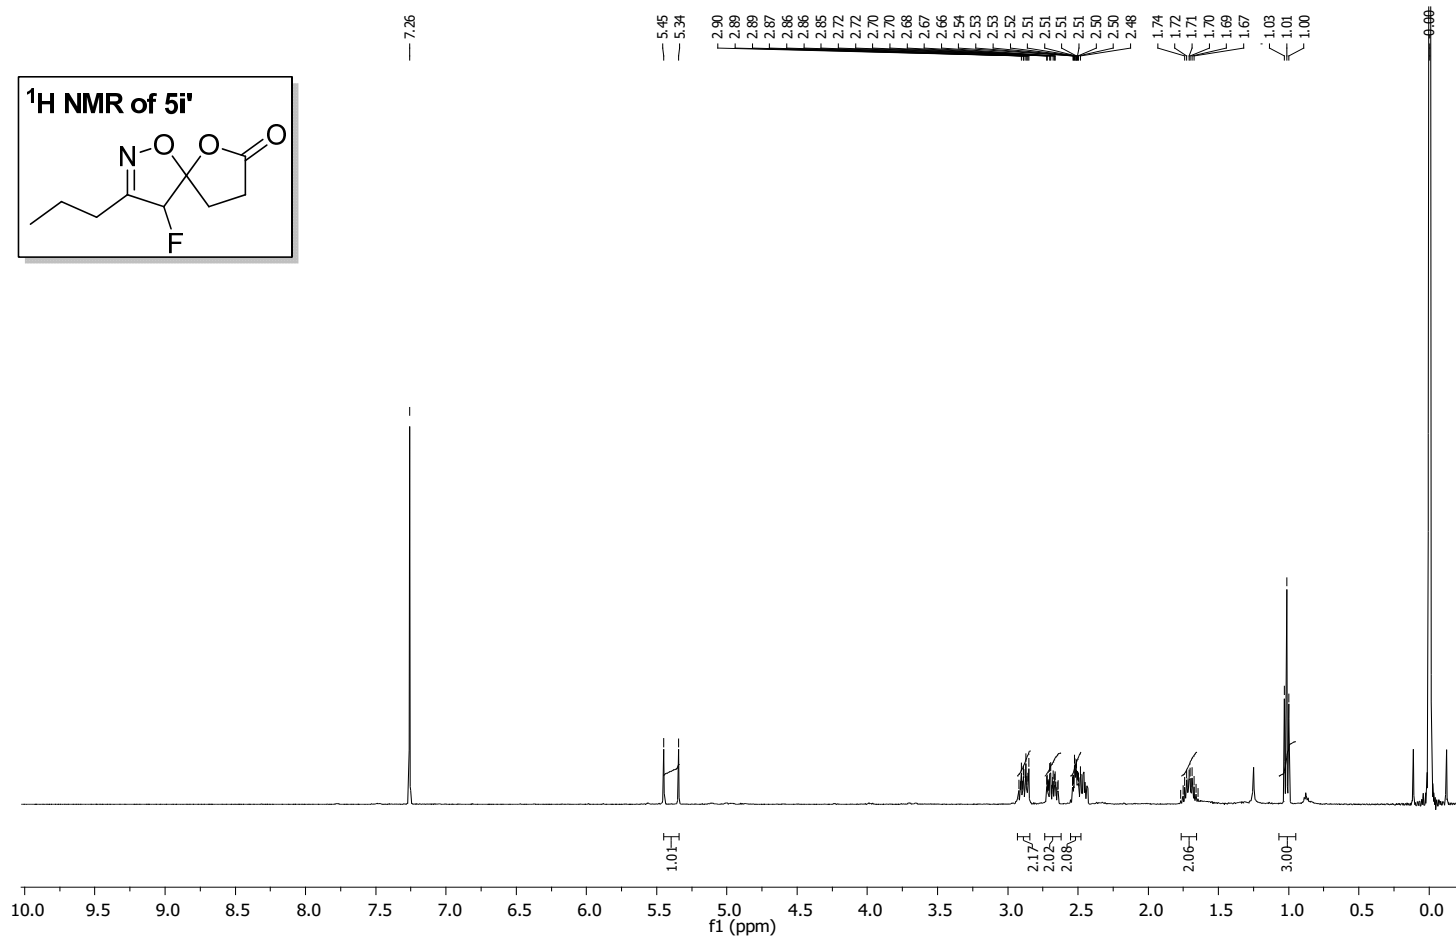

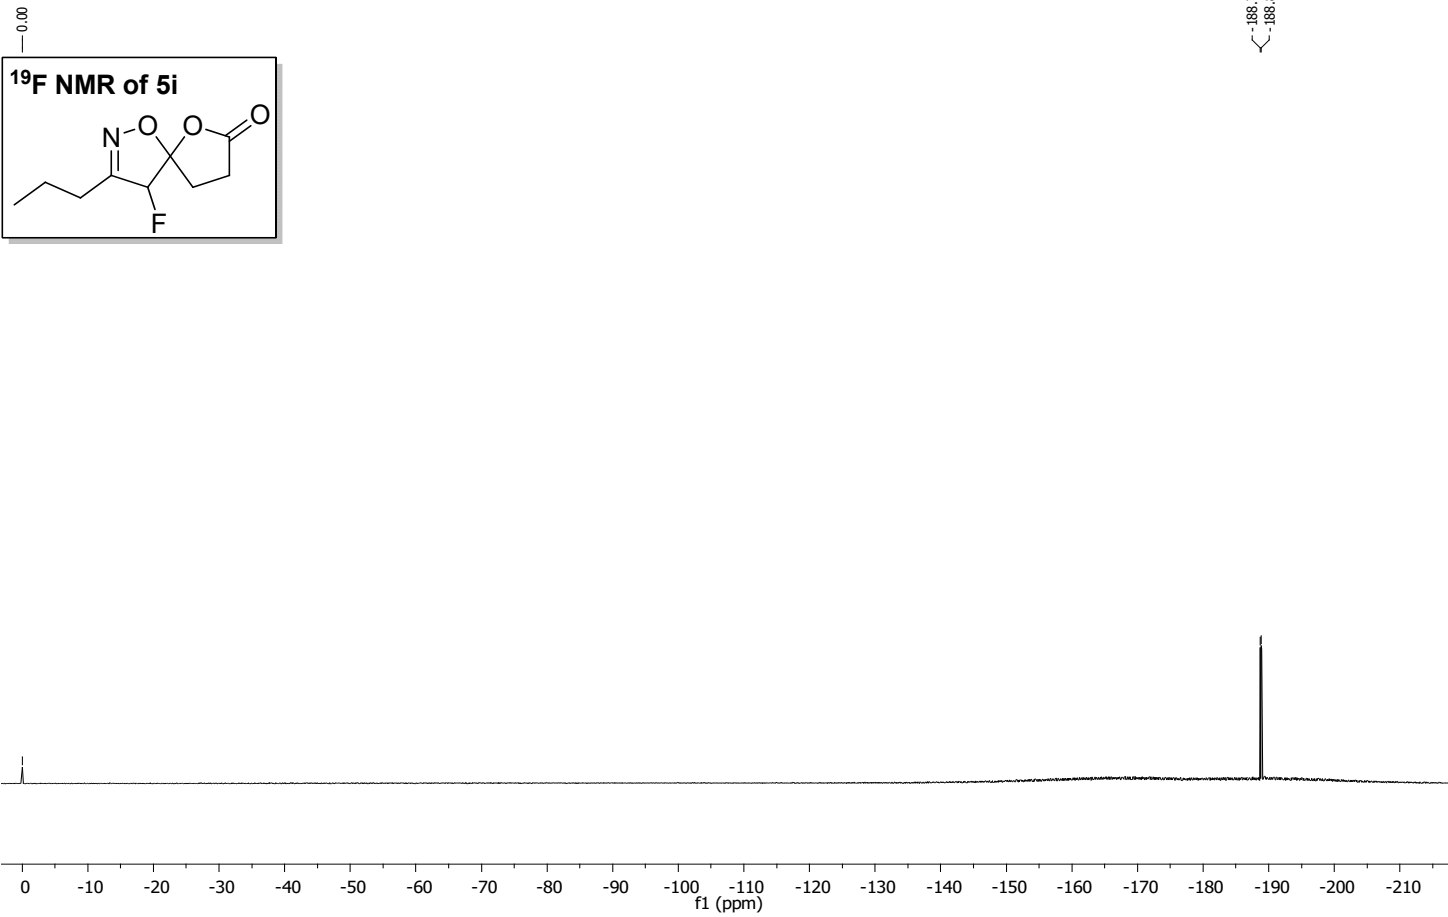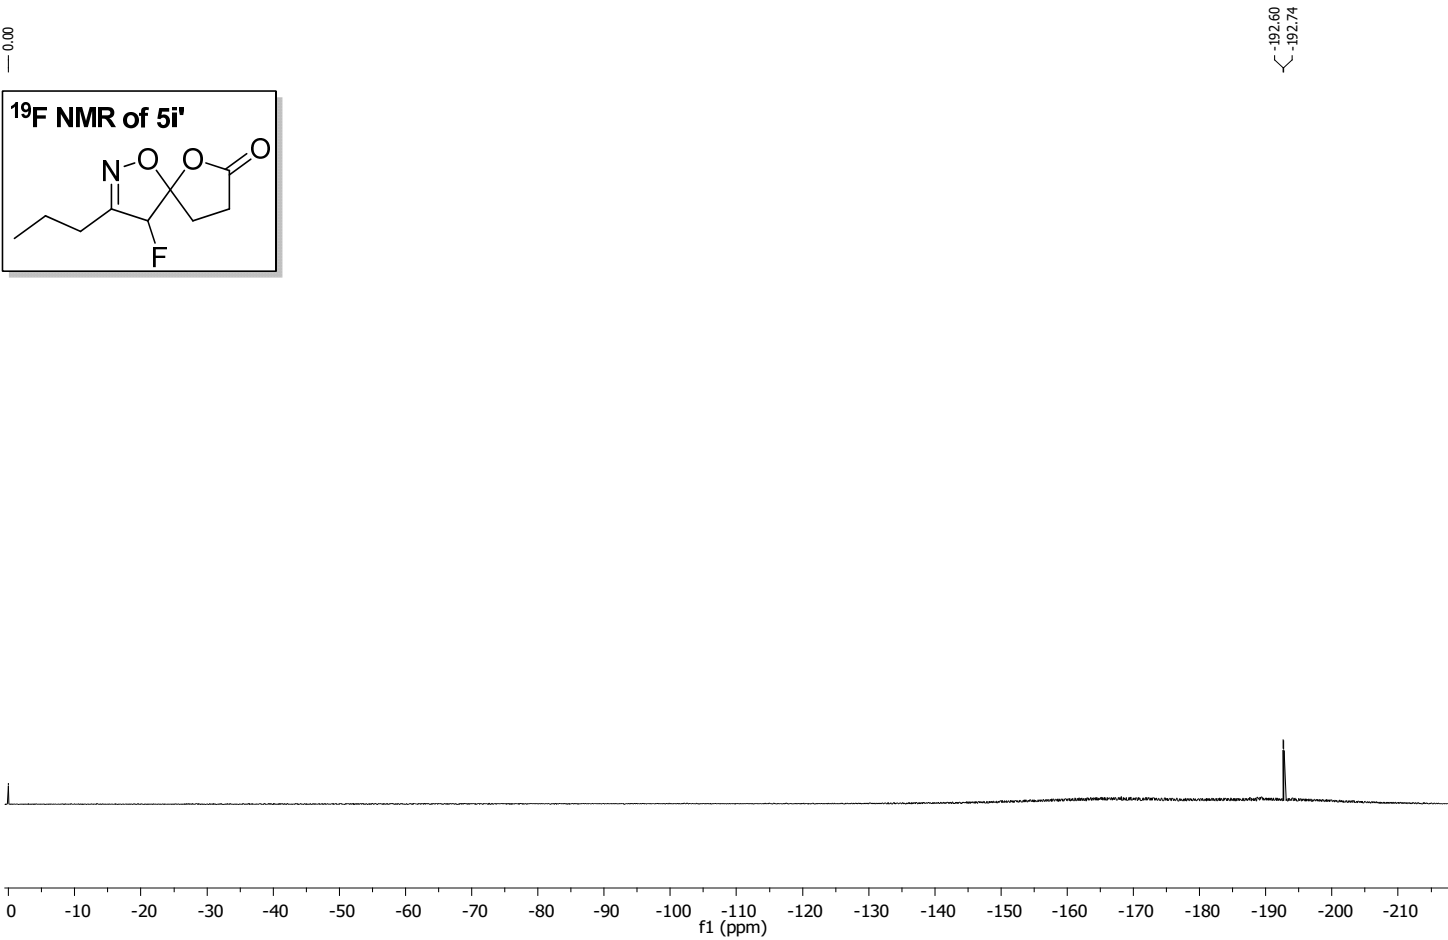

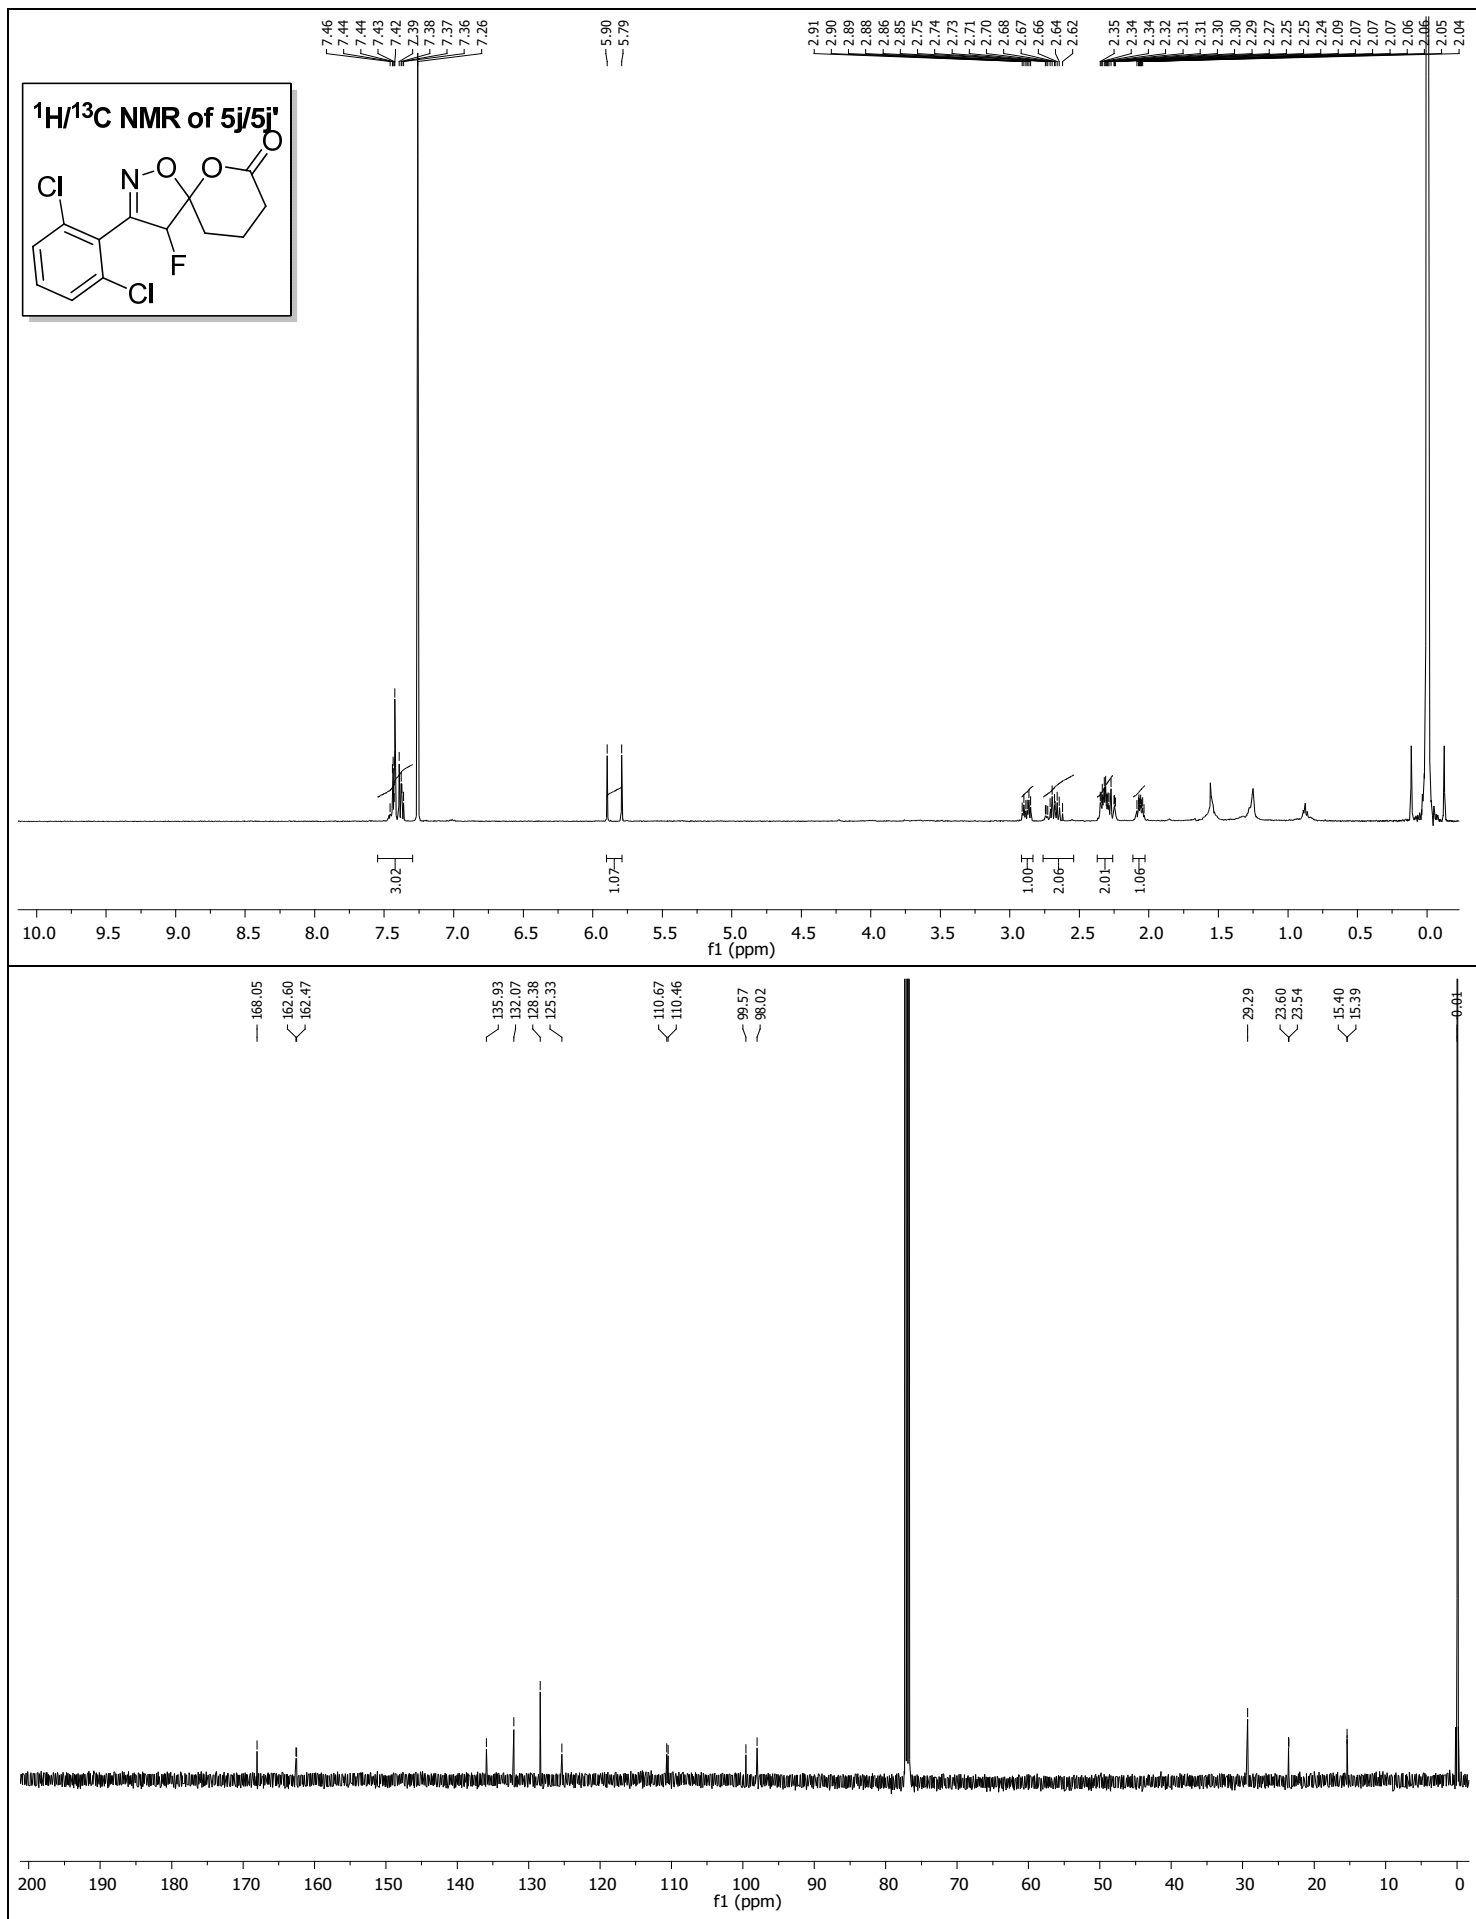

-0.00

-187.63  
-187.77

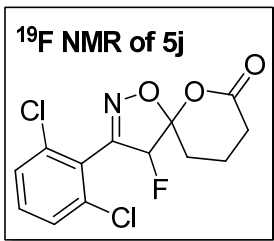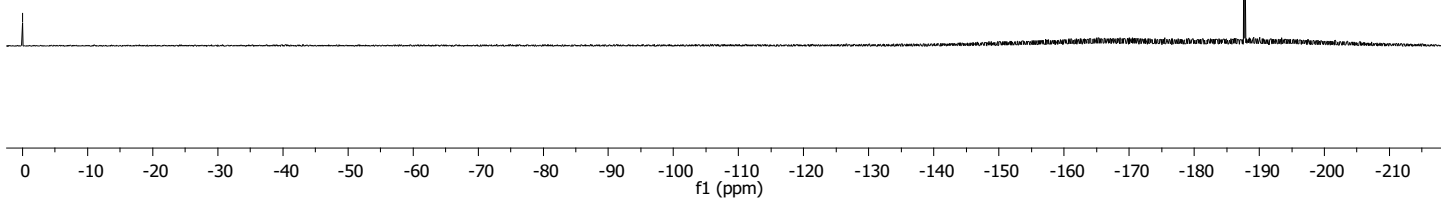

-0.00

-191.44  
-191.58

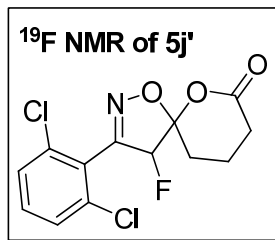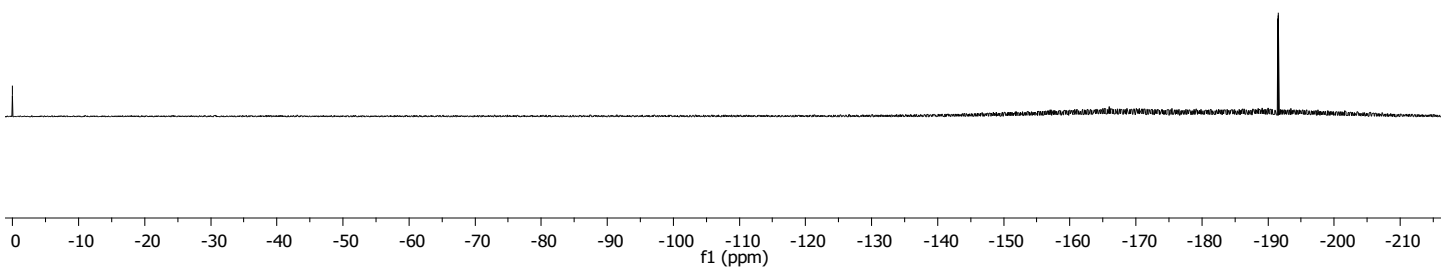

**$^1\text{H}/^{13}\text{C}$  NMR of 5k/5k'**

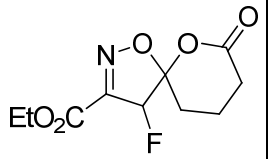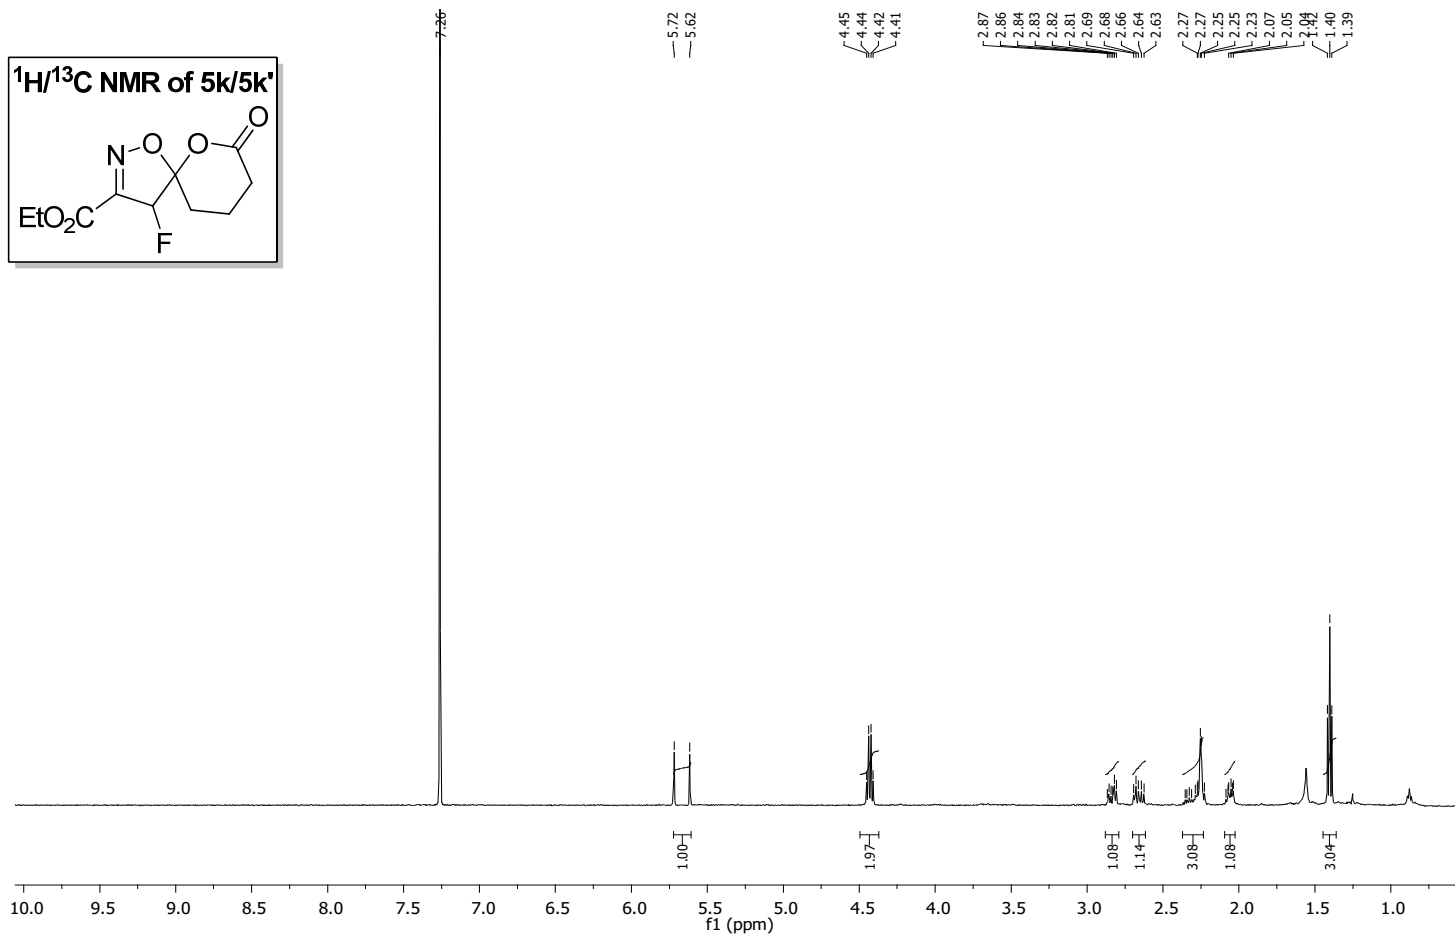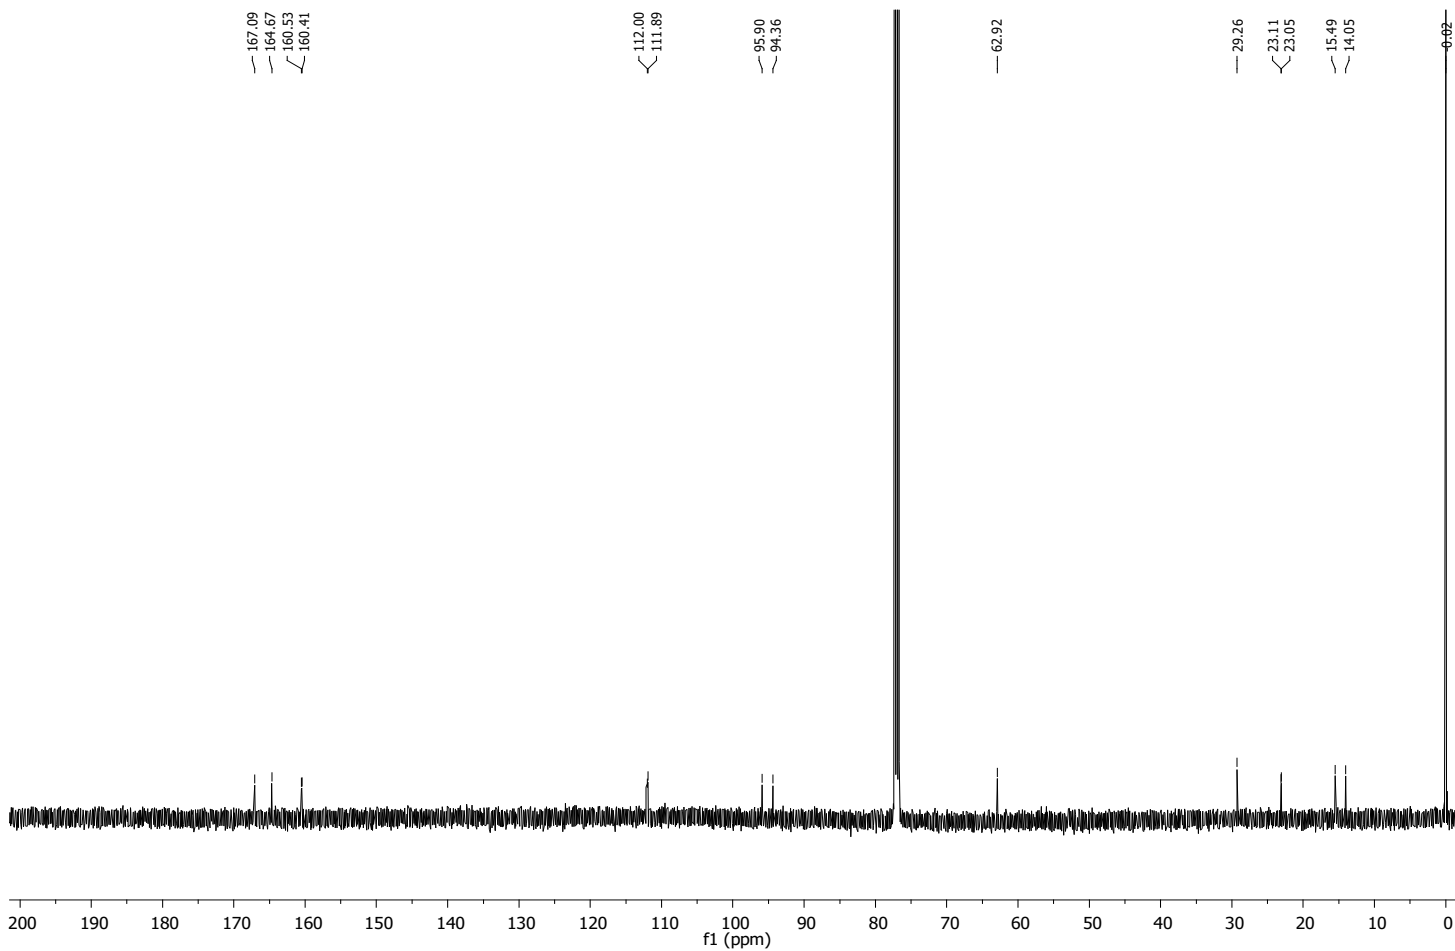

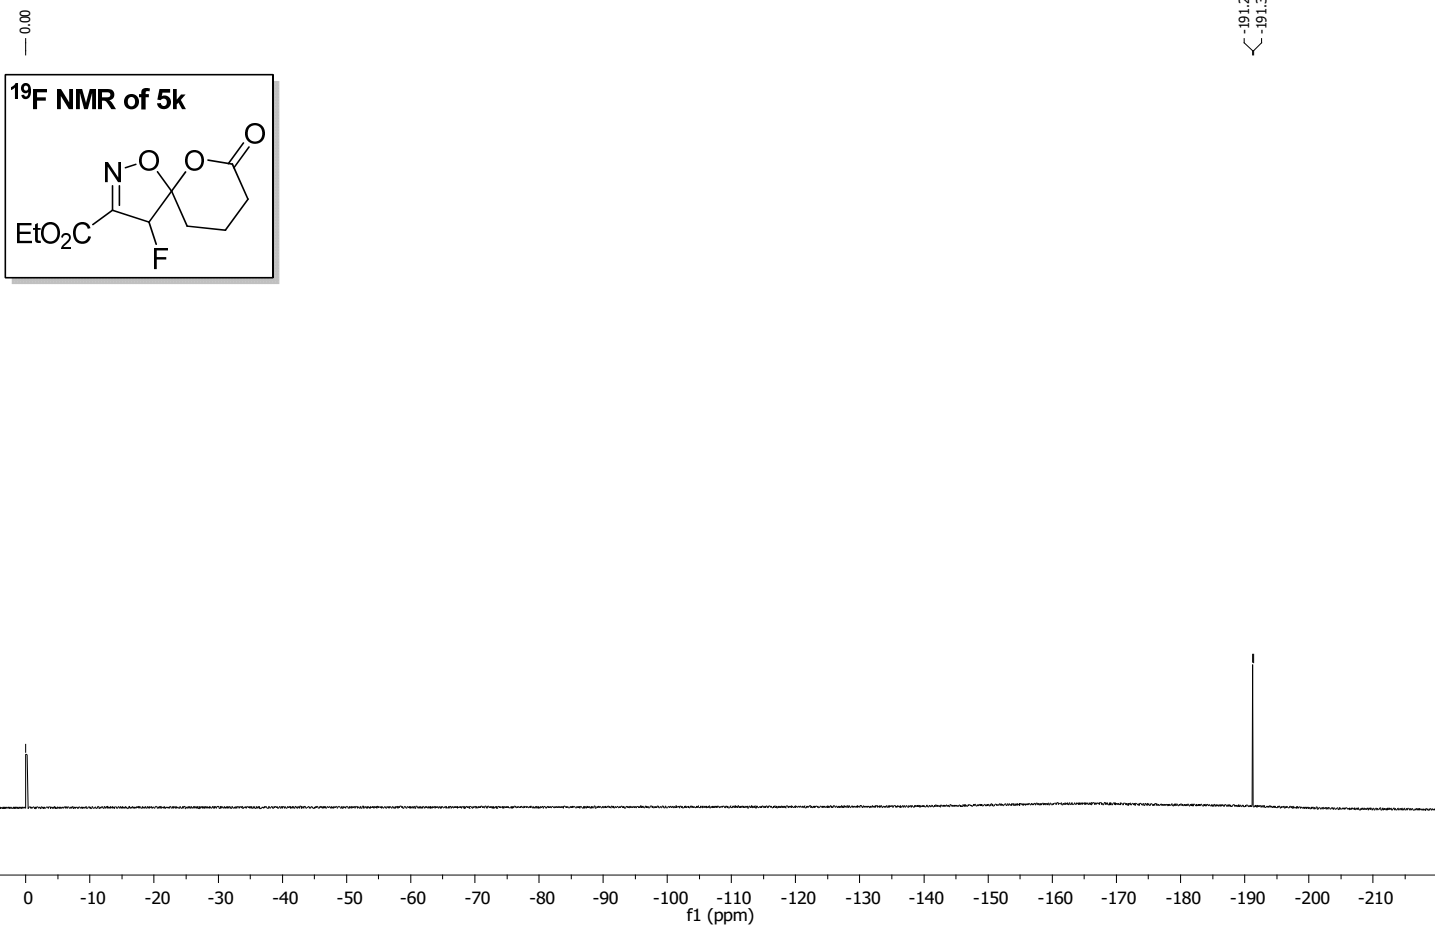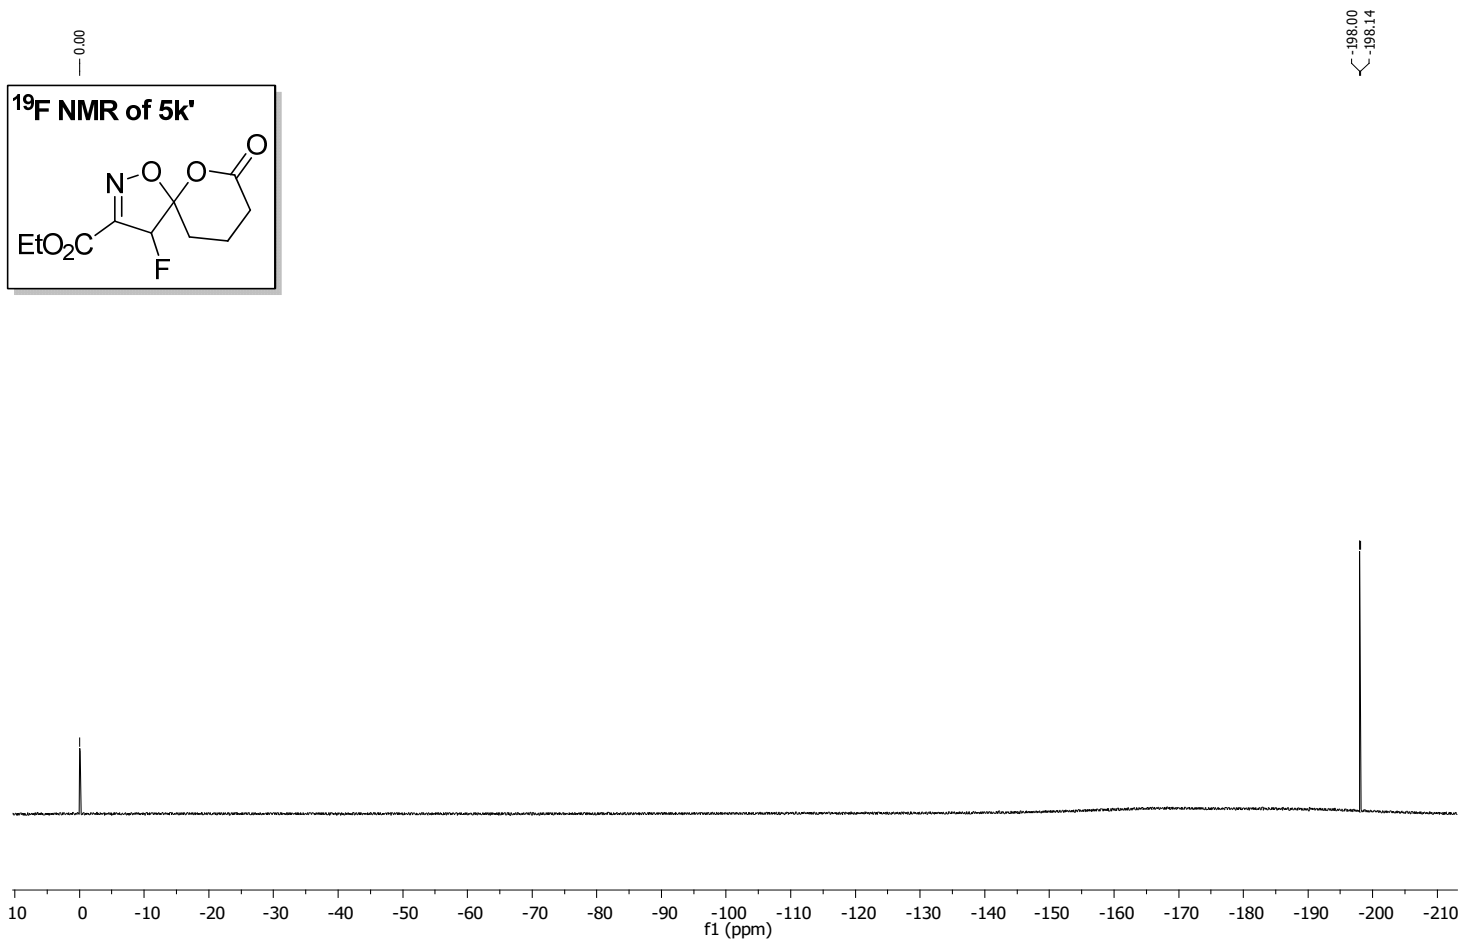

Supplement: d0ra06148d1.pdf [file d0ra06148d1.pdf]
